# Supplementary material
Source: PubMed Central journal article supplement (PMC9012891)
Supplement: mmc1.pdf [file mmc1.pdf]

# THE LANCET

## Supplementary appendix

This appendix formed part of the original submission and has been peer reviewed. We post it as supplied by the authors.

Supplement to: COVID-19 Excess Mortality Collaborators. Estimating excess mortality due to the COVID-19 pandemic: a systematic analysis of COVID-19-related mortality, 2020–21. *Lancet* 2022; published online March 10. [https://doi.org/10.1016/S0140-6736\(21\)02796-3](https://doi.org/10.1016/S0140-6736(21)02796-3).

# Appendix to “Estimating excess mortality due to SARS-CoV-2 pandemic: a systematic analysis of COVID-19 mortality, 2020–2021.”

## Table of contents

|                                                                                                                                                                                                |    |
|------------------------------------------------------------------------------------------------------------------------------------------------------------------------------------------------|----|
| Section 1. Overview .....                                                                                                                                                                      | 3  |
| Section 2. GATHER checklist .....                                                                                                                                                              | 3  |
| Table S1. Checklist for compliance with the Guidelines for Accurate and Transparent Health Estimates Reporting (GATHER) .....                                                                  | 3  |
| Section 3. Input Data.....                                                                                                                                                                     | 4  |
| Table S2. Locations for which input data were available, including data source, whether input is weekly or monthly, and dates covered by the data.....                                         | 4  |
| Table S3. Sources used for reported COVID-19 mortality.....                                                                                                                                    | 8  |
| Section 4. Methods.....                                                                                                                                                                        | 38 |
| Section 4.1 Estimating expected mortality .....                                                                                                                                                | 38 |
| Section 4.1.1 REGMOD .....                                                                                                                                                                     | 38 |
| Section 4.1.2 Poisson regression.....                                                                                                                                                          | 39 |
| Section 4.1.3 Last-year .....                                                                                                                                                                  | 39 |
| Section 4.1.4 Ensemble.....                                                                                                                                                                    | 39 |
| Table S4. Root Mean Squared Error and weights for models used in the Ensemble modelling process.....                                                                                           | 40 |
| Section 4.2 Predicting excess mortality for all locations.....                                                                                                                                 | 40 |
| Section 4.2.1 Compiling a database on excess mortality rate and its relevant covariates for various time period by location after accounting for late registration and under registration..... | 40 |
| Section 4.2.2 A statistical model for predicting excess mortality rate .....                                                                                                                   | 41 |
| Table S5. Covariates selected for use in the final model with direction of influence.....                                                                                                      | 41 |
| Table S6. List of covariates assessed for use in the model.....                                                                                                                                | 42 |
| Section 4.2.3. Predict excess mortality rate for the cumulative period of January 1 2020 and December, 31 2021 .....                                                                           | 43 |
| Section 5. References.....                                                                                                                                                                     | 43 |
| Section 6. Author contributions .....                                                                                                                                                          | 45 |
| Managing the estimation or publication process .....                                                                                                                                           | 45 |
| Writing the first draft of the manuscript.....                                                                                                                                                 | 45 |
| Primary responsibility for applying analytical methods to produce estimates .....                                                                                                              | 45 |
| Primary responsibility for seeking, cataloguing, extracting, or cleaning data; designing or coding figures and tables.....                                                                     | 45 |
| Providing data or critical feedback on data sources.....                                                                                                                                       | 45 |
| Developing methods or computational machinery .....                                                                                                                                            | 45 |
| Providing critical feedback on methods or results.....                                                                                                                                         | 45 |
| Drafting the work or revising it critically for important intellectual content.....                                                                                                            | 45 |

|                                                                                                                                                                                                                 |           |
|-----------------------------------------------------------------------------------------------------------------------------------------------------------------------------------------------------------------|-----------|
| Managing the overall research enterprise .....                                                                                                                                                                  | 46        |
| <b>Section 7. Supplemental Tables and Figures .....</b>                                                                                                                                                         | <b>47</b> |
| Figure S1. Map of all cause data availability.....                                                                                                                                                              | 47        |
| Figure S2. Map of reported Covid19 mortality data availability .....                                                                                                                                            | 47        |
| Figure S3. Estimating expected mortality based on seasonality and secular trends .....                                                                                                                          | 48        |
| Figure S4. (a) The distribution of RMSE by location for each of six models included in the ensemble model, and (b) the estimated excess mortality for Spain for each component model and for the ensemble. .... | 49        |
| Figure S5. Comparison to <i>The Economist</i> excess mortality estimates.....                                                                                                                                   | 50        |
| Figure S6. Late registration in all-cause deaths by countries and territories .....                                                                                                                             | 51        |

## Section 1. Overview

This Appendix accompanies the paper “Estimating excess mortality due to SARS-CoV-2 pandemic: a systematic analysis of COVID-19 mortality, 2020–2021.”

The aim of this paper is to use a novel method to estimate total excess deaths attributable to the COVID-19 pandemic from (a) weekly and monthly all-cause death counts for before and during the pandemic, and (b) official reported counts of COVID-19 deaths. We compile all-cause mortality data from 74 countries and territories and use our model to make estimates of excess mortality for a total of 191 countries and territories.

In the Appendix we describe, in detail, the input data and methods, and include supplemental results. We also include a checklist to demonstrate compliance with the Guidelines for Accurate and Transparent Health Estimates Reporting (GATHER).<sup>1</sup>

## Section 2. GATHER checklist

**Table S1. Checklist for compliance with the Guidelines for Accurate and Transparent Health Estimates Reporting (GATHER)**

| Item #                                                                                                | Checklist item                                                                                                                                                                                                                                                                                                                                                                            | Reported on page #                                                                                                                                                                                                     |
|-------------------------------------------------------------------------------------------------------|-------------------------------------------------------------------------------------------------------------------------------------------------------------------------------------------------------------------------------------------------------------------------------------------------------------------------------------------------------------------------------------------|------------------------------------------------------------------------------------------------------------------------------------------------------------------------------------------------------------------------|
| <b>Objectives and funding</b>                                                                         |                                                                                                                                                                                                                                                                                                                                                                                           |                                                                                                                                                                                                                        |
| 1                                                                                                     | Define the indicator(s), populations (including age, sex, and geographic entities), and time period(s) for which estimates were made.                                                                                                                                                                                                                                                     | Main text: Methods (Overview)                                                                                                                                                                                          |
| 2                                                                                                     | List the funding sources for the work.                                                                                                                                                                                                                                                                                                                                                    | Main text (summary and acknowledgments)                                                                                                                                                                                |
| <b>Data Inputs</b>                                                                                    |                                                                                                                                                                                                                                                                                                                                                                                           |                                                                                                                                                                                                                        |
| <i>For all data inputs from multiple sources that are synthesized as part of the study:</i>           |                                                                                                                                                                                                                                                                                                                                                                                           |                                                                                                                                                                                                                        |
| 3                                                                                                     | Describe how the data were identified and how the data were accessed.                                                                                                                                                                                                                                                                                                                     | Main text (Methods) and appendix (section 3)                                                                                                                                                                           |
| 4                                                                                                     | Specify the inclusion and exclusion criteria. Identify all ad-hoc exclusions.                                                                                                                                                                                                                                                                                                             | Main text (Methods) and appendix (section 3)                                                                                                                                                                           |
| 5                                                                                                     | Provide information on all included data sources and their main characteristics. For each data source used, report reference information or contact name/institution, population represented, data collection method, year(s) of data collection, sex and age range, diagnostic criteria or measurement method, and sample size, as relevant.                                             | Methods appendix (section 3), online data citation tools:<br><a href="http://ghdx.healthdata.org/record/ihme-data/covid_19_excess_mortality">http://ghdx.healthdata.org/record/ihme-data/covid_19_excess_mortality</a> |
| 6                                                                                                     | Identify and describe any categories of input data that have potentially important biases (e.g., based on characteristics listed in item 5).                                                                                                                                                                                                                                              | Main text (Methods) and appendix (section 3)                                                                                                                                                                           |
| <i>For data inputs that contribute to the analysis but were not synthesized as part of the study:</i> |                                                                                                                                                                                                                                                                                                                                                                                           |                                                                                                                                                                                                                        |
| 7                                                                                                     | Describe and give sources for any other data inputs.                                                                                                                                                                                                                                                                                                                                      | Online data citation tools:<br><a href="http://ghdx.healthdata.org/record/ihme-data/covid_19_excess_mortality">http://ghdx.healthdata.org/record/ihme-data/covid_19_excess_mortality</a>                               |
| <i>For all data inputs:</i>                                                                           |                                                                                                                                                                                                                                                                                                                                                                                           |                                                                                                                                                                                                                        |
| 8                                                                                                     | Provide all data inputs in a file format from which data can be efficiently extracted (e.g., a spreadsheet rather than a PDF), including all relevant meta-data listed in item 5. For any data inputs that cannot be shared because of ethical or legal reasons, such as third-party ownership, provide a contact name or the name of the institution that retains the right to the data. | Online data citation tools:<br><a href="http://ghdx.healthdata.org/record/ihme-data/covid_19_excess_mortality">http://ghdx.healthdata.org/record/ihme-data/covid_19_excess_mortality</a>                               |
| <b>Data analysis</b>                                                                                  |                                                                                                                                                                                                                                                                                                                                                                                           |                                                                                                                                                                                                                        |
| 9                                                                                                     | Provide a conceptual overview of the data analysis method. A diagram may be helpful.                                                                                                                                                                                                                                                                                                      | Main text (Methods) and appendix (section 4)                                                                                                                                                                           |
| 10                                                                                                    | Provide a detailed description of all steps of the analysis, including mathematical formulae. This description should cover, as relevant, data cleaning, data pre-processing, data adjustments and weighting of data sources, and mathematical or statistical model(s).                                                                                                                   | Main text (Methods) and appendix (section 4)                                                                                                                                                                           |
| 11                                                                                                    | Describe how candidate models were evaluated and how the final model(s) were selected.                                                                                                                                                                                                                                                                                                    | Appendix (section 4)                                                                                                                                                                                                   |
| 12                                                                                                    | Provide the results of an evaluation of model performance, if done, as well as the results of any relevant sensitivity analysis.                                                                                                                                                                                                                                                          | Appendix (section 4)                                                                                                                                                                                                   |
| 13                                                                                                    | Describe methods for calculating uncertainty of the estimates. State which sources of uncertainty were, and were not, accounted for in the uncertainty analysis.                                                                                                                                                                                                                          | Appendix (section 4)                                                                                                                                                                                                   |
| 14                                                                                                    | State how analytic or statistical source code used to generate estimates can be accessed.                                                                                                                                                                                                                                                                                                 | Github link: <a href="https://github.com/ihmeuw-demographics/publication_covid_em">https://github.com/ihmeuw-demographics/publication_covid_em</a>                                                                     |
| <b>Results and Discussion</b>                                                                         |                                                                                                                                                                                                                                                                                                                                                                                           |                                                                                                                                                                                                                        |

|    |                                                                                                                                                          |                                                                                                                                                                                                                                                                                                |
|----|----------------------------------------------------------------------------------------------------------------------------------------------------------|------------------------------------------------------------------------------------------------------------------------------------------------------------------------------------------------------------------------------------------------------------------------------------------------|
| 15 | Provide published estimates in a file format from which data can be efficiently extracted.                                                               | Online tools:<br><a href="http://ghdx.healthdata.org/record/ihme-data/covid_19_excess_mortality">http://ghdx.healthdata.org/record/ihme-data/covid_19_excess_mortality</a>                                                                                                                     |
| 16 | Report a quantitative measure of the uncertainty of the estimates (e.g. uncertainty intervals).                                                          | 95% UIs are given for all findings, including in the main text, methods appendix, and online tools (Online data citation tools:<br><a href="http://ghdx.healthdata.org/record/ihme-data/covid_19_excess_mortality">http://ghdx.healthdata.org/record/ihme-data/covid_19_excess_mortality</a> ) |
| 17 | Interpret results in light of existing evidence. If updating a previous set of estimates, describe the reasons for changes in estimates.                 | Discussion; appendix figure S5; description for updates available at:<br><a href="https://www.healthdata.org/covid/updates">https://www.healthdata.org/covid/updates</a>                                                                                                                       |
| 18 | Discuss limitations of the estimates. Include a discussion of any modelling assumptions or data limitations that affect interpretation of the estimates. | Main text (Methods and Discussion [limitation section]) and appendix                                                                                                                                                                                                                           |

### Section 3. Input Data

To estimate total COVID-19 mortality, we collated the following inputs:

1. Weekly all-cause mortality data for 2010 to present. For some locations, monthly inputs were used because weekly values were not available (Table S2). Where data back to 2010 was not available, we extracted all available death counts between 2010 and present.
2. Estimates of excess mortality from COVID-19 from publications that have access to data from locations not available to us.
3. Reported COVID-19 mortality for all locations in the analysis
4. Other covariates pertaining to both the COVID-19 pandemic and background population health metrics for all locations in the analysis.

Table S2 provides more details on the sources used for (1) and (2) above.

**Table S2. Locations for which input data were available, including data source, whether input is weekly or monthly, and dates covered by the data.**

| Location                                         | Source                                                                                                                                                   | Time unit | Time period                   |
|--------------------------------------------------|----------------------------------------------------------------------------------------------------------------------------------------------------------|-----------|-------------------------------|
| Macao Special Administrative Region of China     | Macao Monthly Bulletin of Statistics                                                                                                                     | Month     | Dec 2015 - Nov 2021           |
| Hong Kong Special Administrative Region of China | Hong Kong Monthly Digest of Statistics                                                                                                                   | Month     | Jan 2018 - Nov 2021           |
| Taiwan (Province of China)                       | Taiwan Human Mortality Database Short-term Mortality Fluctuations (STMF); Taiwan Monthly Bulletin of Interior Statistics; World Mortality Database (WMD) | Month     | Jan 2010 - Dec 2021           |
| Philippines                                      | Philippines Vital Registration                                                                                                                           | Month     | Jan 2015 - Nov 2021           |
| Philippines, subnational                         | Philippines Vital Registration                                                                                                                           | Month     | Jan 2015 - Nov 2021           |
| Thailand                                         | Thailand Monthly Death Count Statistics                                                                                                                  | Month     | Jan 2015 - Dec 2021           |
| South Africa                                     | South Africa Report on Weekly Deaths                                                                                                                     | Week      | Week 1, 2014 - Week 52, 2021  |
| Armenia                                          | Armenia Deaths by Week, Sex and 5-year Age Group - Eurostat                                                                                              | Week      | Week 1, 2017 - Week 38, 2021  |
| Azerbaijan                                       | Azerbaijan Socioeconomic Indicators January-November 2021                                                                                                | Month     | Jan 2018 - Nov 2021           |
| Georgia                                          | Georgia Summary Vital Statistics, January-June 2020 (Preliminary Data)                                                                                   | Week      | Week 14, 2015 - Week 13, 2021 |
| Kazakhstan                                       | Kazakhstan Monthly Number of Deaths; World Mortality Database (WMD)                                                                                      | Month     | Jan 2018 - Nov 2021           |
| Kyrgyzstan                                       | Kyrgyzstan Natural Movement of the Population                                                                                                            | Month     | Jan 2018 - Nov 2021           |
| Mongolia                                         | Mongolia Deaths by Region and Month                                                                                                                      | Month     | Jan 2016 - Dec 2021           |

| Location               | Source                                                                                                                                                                                                                | Time unit | Time period                  |
|------------------------|-----------------------------------------------------------------------------------------------------------------------------------------------------------------------------------------------------------------------|-----------|------------------------------|
| Uzbekistan             | Uzbekistan Deaths by Month of Death - United Nations Statistics Division; Uzbekistan Demographic Situation January-December 2021; World Mortality Database (WMD)                                                      | Month     | Jan 2013 - Dec 2021          |
| Albania                | Albania Deaths by Week, Sex and 5-year Age Group - Eurostat                                                                                                                                                           | Week      | Week 1, 2017 - Week 37, 2021 |
| Bosnia and Herzegovina | Bosnia And Herzegovina Natural Population Movement And Marriages                                                                                                                                                      | Month     | Jan 2018 - Sep 2021          |
| Bulgaria               | Bulgaria Human Mortality Database Short-term Mortality Fluctuations (STMF)                                                                                                                                            | Week      | Week 1, 2010 - Week 52, 2021 |
| Croatia                | Croatia Human Mortality Database Short-term Mortality Fluctuations (STMF)                                                                                                                                             | Week      | Week 1, 2010 - Week 52, 2021 |
| Czechia                | Czech Republic Human Mortality Database Short-term Mortality Fluctuations (STMF)                                                                                                                                      | Week      | Week 1, 2010 - Week 51, 2021 |
| Hungary                | Hungary Human Mortality Database Short-term Mortality Fluctuations (STMF)                                                                                                                                             | Week      | Week 1, 2010 - Week 52, 2021 |
| North Macedonia        | North Macedonia Deaths by Month of Death - United Nations Statistics Division; North Macedonia Monthly Statistical Report; World Mortality Database (WMD)                                                             | Month     | Jan 2010 - Nov 2021          |
| Montenegro             | Montenegro Monthly Statistical Review                                                                                                                                                                                 | Month     | Jan 2017 - Oct 2021          |
| Poland                 | Poland Human Mortality Database Short-term Mortality Fluctuations (STMF)                                                                                                                                              | Week      | Week 1, 2010 - Week 52, 2021 |
| Romania                | Romania Deaths by Week, Sex and 5-year Age Group - Eurostat                                                                                                                                                           | Week      | Week 1, 2017 - Week 47, 2021 |
| Serbia                 | Serbia Deaths by Week, Sex and 5-year Age Group - Eurostat                                                                                                                                                            | Week      | Week 1, 2017 - Week 47, 2021 |
| Slovakia               | Slovakia Human Mortality Database Short-term Mortality Fluctuations (STMF)                                                                                                                                            | Week      | Week 1, 2010 - Week 51, 2021 |
| Slovenia               | Slovenia Human Mortality Database Short-term Mortality Fluctuations (STMF)                                                                                                                                            | Week      | Week 1, 2010 - Week 52, 2021 |
| Belarus                | Belarus Deaths by Month of Death - United Nations Statistics Division; World Mortality Database (WMD)                                                                                                                 | Month     | Jan 2011 - Mar 2021          |
| Estonia                | Estonia Human Mortality Database Short-term Mortality Fluctuations (STMF)                                                                                                                                             | Week      | Week 1, 2010 - Week 52, 2021 |
| Latvia                 | Latvia Human Mortality Database Short-term Mortality Fluctuations (STMF)                                                                                                                                              | Week      | Week 1, 2010 - Week 52, 2021 |
| Lithuania              | Lithuania Human Mortality Database Short-term Mortality Fluctuations (STMF)                                                                                                                                           | Week      | Week 1, 2010 - Week 52, 2021 |
| Moldova                | Moldova Deaths by Month of Death - United Nations Statistics Division; Moldova Quarterly Statistical Bulletin                                                                                                         | Month     | Jan 2014 - Sep 2021          |
| Russia                 | Russia Natural Movement of the Population; World Mortality Database (WMD)                                                                                                                                             | Month     | Jan 2016 - Dec 2021          |
| Russia, subnational    | Russia Natural Movement of the Population                                                                                                                                                                             | Month     | Jan 2016 - Nov 2021          |
| Ukraine                | Ukraine Deaths by Month of Death - United Nations Statistics Division; Ukraine Number of Live Births, Deaths January-December 2020, by Region; Ukraine Number of Live Births, Deaths January-November 2021, by Region | Month     | Jan 2010 - Nov 2021          |
| Japan                  | Japan Excess and Exiguous Deaths Dashboard - Weekly Deaths                                                                                                                                                            | Week      | Week 1, 2010 - Week 38, 2021 |
| Japan, subnational     | Japan Excess and Exiguous Deaths Dashboard - Weekly Deaths                                                                                                                                                            | Week      | Week 1, 2010 - Week 38, 2021 |
| South Korea            | South Korea Human Mortality Database Short-term Mortality Fluctuations (STMF)                                                                                                                                         | Week      | Week 1, 2010 - Week 47, 2021 |
| Singapore              | Singapore Deaths By Ethnic Group And Sex, Monthly                                                                                                                                                                     | Month     | Jan 2010 - Sep 2021          |
| Australia              | World Mortality Database (WMD)                                                                                                                                                                                        | Week      | Week 1, 2015 - Week 43, 2021 |
| New Zealand            | New Zealand Human Mortality Database Short-term Mortality Fluctuations (STMF)                                                                                                                                         | Week      | Week 1, 2011 - Week 52, 2021 |
| Austria                | Austria Human Mortality Database Short-term Mortality Fluctuations (STMF)                                                                                                                                             | Week      | Week 1, 2010 - Week 52, 2021 |

| Location              | Source                                                                                                               | Time unit | Time period                  |
|-----------------------|----------------------------------------------------------------------------------------------------------------------|-----------|------------------------------|
| Belgium               | Belgium Human Mortality Database Short-term Mortality Fluctuations (STMF)                                            | Week      | Week 1, 2010 - Week 52, 2021 |
| Cyprus                | Cyprus Deaths by Week, Sex and 5-year Age Group - Eurostat                                                           | Week      | Week 1, 2017 - Week 47, 2021 |
| Denmark               | Denmark Human Mortality Database Short-term Mortality Fluctuations (STMF)                                            | Week      | Week 1, 2010 - Week 52, 2021 |
| Finland               | Finland Human Mortality Database Short-term Mortality Fluctuations (STMF)                                            | Week      | Week 1, 2010 - Week 51, 2021 |
| France                | France Human Mortality Database Short-term Mortality Fluctuations (STMF)                                             | Week      | Week 1, 2010 - Week 52, 2021 |
| Germany               | Germany Human Mortality Database Short-term Mortality Fluctuations (STMF)                                            | Week      | Week 1, 2016 - Week 52, 2021 |
| Greece                | Greece Human Mortality Database Short-term Mortality Fluctuations (STMF)                                             | Week      | Week 1, 2016 - Week 52, 2021 |
| Iceland               | Iceland Human Mortality Database Short-term Mortality Fluctuations (STMF)                                            | Week      | Week 1, 2010 - Week 52, 2021 |
| Ireland               | Ireland - Measuring Mortality Using Public Data Sources; Ireland Daily Death Notices; World Mortality Database (WMD) | Month     | Jan 2015 - Nov 2021          |
| Israel                | Israel Human Mortality Database Short-term Mortality Fluctuations (STMF)                                             | Week      | Week 1, 2010 - Week 52, 2021 |
| Italy                 | Italy Human Mortality Database Short-term Mortality Fluctuations (STMF)                                              | Week      | Week 1, 2011 - Week 47, 2021 |
| Italy, subnational    | Italy Daily Mortality Data 2011-2021                                                                                 | Week      | Week 1, 2011 - Week 48, 2021 |
| Luxembourg            | Luxembourg Human Mortality Database Short-term Mortality Fluctuations (STMF)                                         | Week      | Week 1, 2010 - Week 52, 2021 |
| Malta                 | Malta Deaths by Week, Sex and 5-year Age Group - Eurostat                                                            | Week      | Week 1, 2017 - Week 52, 2021 |
| Netherlands           | Netherlands Human Mortality Database Short-term Mortality Fluctuations (STMF)                                        | Week      | Week 1, 2010 - Week 52, 2021 |
| Norway                | Norway Human Mortality Database Short-term Mortality Fluctuations (STMF)                                             | Week      | Week 1, 2010 - Week 52, 2021 |
| Portugal              | Portugal Human Mortality Database Short-term Mortality Fluctuations (STMF)                                           | Week      | Week 1, 2010 - Week 52, 2021 |
| San Marino            | San Marino Statistical Bulletin; World Mortality Database (WMD)                                                      | Month     | March, 2016 - Nov, 2021      |
| Spain                 | Spain Human Mortality Database Short-term Mortality Fluctuations (STMF)                                              | Week      | Week 1, 2010 - Week 52, 2021 |
| Sweden                | Sweden Human Mortality Database Short-term Mortality Fluctuations (STMF)                                             | Week      | Week 1, 2010 - Week 52, 2021 |
| Switzerland           | Switzerland Human Mortality Database Short-term Mortality Fluctuations (STMF)                                        | Week      | Week 1, 2010 - Week 52, 2021 |
| England               | United Kingdom - England and Wales Deaths Registered Weekly 2021                                                     | Week      | Week 1, 2017 - Week 52, 2021 |
| Northern Ireland      | Northern Ireland Human Mortality Database Short-term Mortality Fluctuation                                           | Week      | Week 2, 2015 - Week 52, 2021 |
| Scotland              | Scotland Human Mortality Database Short-term Mortality Fluctuations (STMF)                                           | Week      | Week 1, 2010 - Week 52, 2021 |
| Wales                 | United Kingdom - England and Wales Deaths Registered Weekly 2021                                                     | Week      | Week 1, 2017 - Week 52, 2021 |
| Chile                 | Chile Human Mortality Database Short-term Mortality Fluctuations (STMF)                                              | Week      | Week 1, 2016 - Week 52, 2021 |
| Canada                | Canada Human Mortality Database Short-term Mortality Fluctuations (STMF)                                             | Week      | Week 1, 2010 - Week 41, 2021 |
| Greenland             | Greenland Preliminary Deaths Report by Month                                                                         | Month     | Jan 2018 – Sep 2021          |
| USA                   | United States Human Mortality Database Short-term Mortality Fluctuations (STMF); World Mortality Database (WMD)      | Week      | Week 2, 2015 - Week 52, 2021 |
| USA, subnational      | United States NVSS; United States Weekly Counts of Deaths by State and Select Causes                                 | Month     | Jan 2010 - Dec 2021          |
| Puerto Rico           | United States NVSS; United States Weekly Counts of Deaths by State and Select Causes                                 | Month     | Jan 2010 - Dec 2021          |
| Saint Kitts and Nevis | Saint Kitts and Nevis Reported Deaths                                                                                | Month     | Jan 2016 - Dec 2020          |
| Ecuador               | Ecuador General Deaths                                                                                               | Week      | Week 1, 2016 - Week 52, 2021 |

| Location                                                               | Source                                                                                                                                                                                                                                                 | Time unit | Time period                                 |
|------------------------------------------------------------------------|--------------------------------------------------------------------------------------------------------------------------------------------------------------------------------------------------------------------------------------------------------|-----------|---------------------------------------------|
| Peru                                                                   | Peru Death Information System (SINADEF) - System Report of Daily Deaths                                                                                                                                                                                | Month     | Jan 2017 - Dec 2021                         |
| Antigua and Barbuda                                                    | Antigua and Barbuda Deaths by Month and Sex                                                                                                                                                                                                            | Month     | Jan 2010 - Dec 2020                         |
| Cuba                                                                   | Cuba Demographic Yearbook                                                                                                                                                                                                                              | Month     | Jan 2010 - Dec 2020                         |
| Colombia                                                               | Colombia Vital Statistics; Colombia Excess Mortality - Non-Fetal Deaths Per Week 2020-2021                                                                                                                                                             | Month     | Jan 2018 - Dec 2021                         |
| Costa Rica                                                             | Costa Rica Deaths by Month of Death - United Nations Statistics Division; Costa Rica Deaths 2020: the Impact of COVID-19 (preliminary); Costa Rica Registered Deaths 2020 (Preliminary)                                                                | Month     | Jan 2010 - Dec 2020                         |
| Guatemala                                                              | Guatemala Vital Statistics; World Mortality Database (WMD)                                                                                                                                                                                             | Month     | Jan 2013 - Aug 2021                         |
| Mexico                                                                 | Mexico Vital Registration – Deaths; Mexico Database of the Statistical Bulletin on Excess Mortality 2020-2021; World Mortality Database (WMD)                                                                                                          | Week      | Week 1, 2010 - Week 49, 2021                |
| Mexico, subnational                                                    | Mexico Vital Registration – Deaths                                                                                                                                                                                                                     | Week      | Jan 2010 – Dec 2020                         |
| Brazil                                                                 | Brazil Mortality Information System – Deaths; Brazil Mortality Information System - Deaths (Preliminary); Brazil Analysis Panel of Excess Mortality from Natural Causes                                                                                | Week      | Week 1, 2010 - Week 35, 2021                |
| Brazil, subnational                                                    | Brazil Mortality Information System – Deaths; Brazil Mortality Information System - Deaths (Preliminary); Brazil Analysis Panel of Excess Mortality from Natural Causes                                                                                | Week      | Week 1, 2010 - Week 35, 2021                |
| Paraguay                                                               | Paraguay Vital Statistics Sub System (SSIEV) Multi Reporting - Deaths                                                                                                                                                                                  | Month     | Jan 2017 - Dec 2021                         |
| Egypt                                                                  | Egypt Deaths by Month of Death - United Nations Statistics Division                                                                                                                                                                                    | Month     | Jan 2010 - Jun 2021                         |
| Oman                                                                   | Oman Vital Registration – Deaths; Oman Monthly Statistical Bulletin                                                                                                                                                                                    | Month     | Jul 2017 - Dec 2021                         |
| Qatar                                                                  | Qatar Vital Statistics Annual Bulletin; Qatar Monthly Statistics Statistics; World Mortality Database (WMD)                                                                                                                                            | Month     | Jan 2018 - Dec 2021                         |
| <i>Input excess mortality from other publications</i>                  |                                                                                                                                                                                                                                                        |           |                                             |
| Iran                                                                   | Excess deaths associated with the Iranian COVID-19 epidemic: A province-level analysis                                                                                                                                                                 | Week      | Week 38, 2020                               |
| Mumbai                                                                 | India - Mumbai Monthly Burials                                                                                                                                                                                                                         | Month     | July 2020                                   |
| South Africa, subnational                                              | South Africa Report on Weekly Deaths                                                                                                                                                                                                                   | Week      | Week 18, 2020 – Week 52, 2021               |
| <i>Input excess mortality from other publications for India States</i> |                                                                                                                                                                                                                                                        |           |                                             |
| Andhra Pradesh                                                         | Excess mortality in India from June 2020 to June 2021 during the COVID pandemic: death registration, health facility deaths, and survey data. Preprint; Andhra Pradesh saw 400% increase in deaths in May, Tamil Nadu saw more modest excess mortality | Month     | July 2020 - Oct 2020; Jan 2021 - May 2021   |
| Assam                                                                  | Excess mortality in India from June 2020 to June 2021 during the COVID pandemic: death registration, health facility deaths, and survey data. Preprint; Assam saw 28,000 more deaths than normal in months when first wave of Covid-19 struck          | Month     | July 2020 - Oct 2020; Jan 2021 - May 2021   |
| Chhattisgarh                                                           | Chhattisgarh's excess deaths at least 4.8 times COVID-19 toll                                                                                                                                                                                          | Month     | April - May 2021                            |
| Gujarat                                                                | Excess mortality in India from June 2020 to June 2021 during the COVID pandemic: death registration, health facility deaths, and survey data. Preprint                                                                                                 | Month     | March 2020 - May 2021                       |
| Haryana                                                                | Excess mortality in India from June 2020 to June 2021 during the COVID pandemic: death                                                                                                                                                                 | Month     | July 2020 - Dec 2020, April 2021 - May 2021 |



| Location       | Source                                                                                                                                                                                                                                                     | Time unit | Time period            |
|----------------|------------------------------------------------------------------------------------------------------------------------------------------------------------------------------------------------------------------------------------------------------------|-----------|------------------------|
|                | registration, health facility deaths, and survey data. Preprint                                                                                                                                                                                            |           |                        |
| Karnataka      | Karnataka recorded 1.02 lakh 'excess' deaths in 2021, 5 times the COVID-19 toll                                                                                                                                                                            | Month     | Jan 2021 - June 2021   |
| Kerala         | Excess mortality in India from June 2020 to June 2021 during the COVID pandemic: death registration, health facility deaths, and survey data. Preprint                                                                                                     | Month     | Aug 2020 - May 2021    |
| Madhya Pradesh | Excess mortality in India from June 2020 to June 2021 during the COVID pandemic: death registration, health facility deaths, and survey data. Preprint; Madhya Pradesh saw nearly three times more deaths than normal after second wave of Covid-19 struck | Month     | July 2020 - May 2021   |
| Odisha         | Excess mortality in India from June 2020 to June 2021 during the COVID pandemic: death registration, health facility deaths, and survey data. Preprint                                                                                                     | Month     | Jan 2021 - June 2021   |
| Rajasthan      | Excess deaths in Rajasthan are at least five times the official COVID-19 tally                                                                                                                                                                             | Month     | April 2020 - May 2021  |
| Tamil Nadu     | Andhra Pradesh saw 400% increase in deaths in May, Tamil Nadu saw more modest excess mortality                                                                                                                                                             | Month     | April 2020 - May 2021  |
| Uttar Pradesh  | Uttar Pradesh - 24 districts reported 110% more deaths between July and March than same period the previous year                                                                                                                                           | Month     | July 2020 - March 2021 |

**Table S3. Sources used for reported COVID-19 mortality**

| Location            | Source                                                                                                                                                      |
|---------------------|-------------------------------------------------------------------------------------------------------------------------------------------------------------|
| Afghanistan         | Johns Hopkins University. 2019 Novel Coronavirus COVID-19 (2019-nCoV) Data Repository by Johns Hopkins CSSE. Baltimore, Maryland: Johns Hopkins University. |
| Albania             | Johns Hopkins University. 2019 Novel Coronavirus COVID-19 (2019-nCoV) Data Repository by Johns Hopkins CSSE. Baltimore, Maryland: Johns Hopkins University. |
| Algeria             | Johns Hopkins University. 2019 Novel Coronavirus COVID-19 (2019-nCoV) Data Repository by Johns Hopkins CSSE. Baltimore, Maryland: Johns Hopkins University. |
| American Samoa      | Johns Hopkins University. 2019 Novel Coronavirus COVID-19 (2019-nCoV) Data Repository by Johns Hopkins CSSE. Baltimore, Maryland: Johns Hopkins University. |
| Andorra             | Johns Hopkins University. 2019 Novel Coronavirus COVID-19 (2019-nCoV) Data Repository by Johns Hopkins CSSE. Baltimore, Maryland: Johns Hopkins University. |
| Angola              | Johns Hopkins University. 2019 Novel Coronavirus COVID-19 (2019-nCoV) Data Repository by Johns Hopkins CSSE. Baltimore, Maryland: Johns Hopkins University. |
| Antigua and Barbuda | Johns Hopkins University. 2019 Novel Coronavirus COVID-19 (2019-nCoV) Data Repository by Johns Hopkins CSSE. Baltimore, Maryland: Johns Hopkins University. |
| Argentina           | Johns Hopkins University. 2019 Novel Coronavirus COVID-19 (2019-nCoV) Data Repository by Johns Hopkins CSSE. Baltimore, Maryland: Johns Hopkins University. |

|                        |                                                                                                                                                             |
|------------------------|-------------------------------------------------------------------------------------------------------------------------------------------------------------|
| Armenia                | Johns Hopkins University. 2019 Novel Coronavirus COVID-19 (2019-nCoV) Data Repository by Johns Hopkins CSSE. Baltimore, Maryland: Johns Hopkins University. |
| Australia              | Johns Hopkins University. 2019 Novel Coronavirus COVID-19 (2019-nCoV) Data Repository by Johns Hopkins CSSE. Baltimore, Maryland: Johns Hopkins University. |
| Austria                | Johns Hopkins University. 2019 Novel Coronavirus COVID-19 (2019-nCoV) Data Repository by Johns Hopkins CSSE. Baltimore, Maryland: Johns Hopkins University. |
| Azerbaijan             | Johns Hopkins University. 2019 Novel Coronavirus COVID-19 (2019-nCoV) Data Repository by Johns Hopkins CSSE. Baltimore, Maryland: Johns Hopkins University. |
| Bahrain                | Johns Hopkins University. 2019 Novel Coronavirus COVID-19 (2019-nCoV) Data Repository by Johns Hopkins CSSE. Baltimore, Maryland: Johns Hopkins University. |
| Bangladesh             | Johns Hopkins University. 2019 Novel Coronavirus COVID-19 (2019-nCoV) Data Repository by Johns Hopkins CSSE. Baltimore, Maryland: Johns Hopkins University. |
| Barbados               | Johns Hopkins University. 2019 Novel Coronavirus COVID-19 (2019-nCoV) Data Repository by Johns Hopkins CSSE. Baltimore, Maryland: Johns Hopkins University. |
| Belarus                | Johns Hopkins University. 2019 Novel Coronavirus COVID-19 (2019-nCoV) Data Repository by Johns Hopkins CSSE. Baltimore, Maryland: Johns Hopkins University. |
| Belgium                | Johns Hopkins University. 2019 Novel Coronavirus COVID-19 (2019-nCoV) Data Repository by Johns Hopkins CSSE. Baltimore, Maryland: Johns Hopkins University. |
| Belize                 | Johns Hopkins University. 2019 Novel Coronavirus COVID-19 (2019-nCoV) Data Repository by Johns Hopkins CSSE. Baltimore, Maryland: Johns Hopkins University. |
| Benin                  | Johns Hopkins University. 2019 Novel Coronavirus COVID-19 (2019-nCoV) Data Repository by Johns Hopkins CSSE. Baltimore, Maryland: Johns Hopkins University. |
| Bermuda                | Johns Hopkins University. 2019 Novel Coronavirus COVID-19 (2019-nCoV) Data Repository by Johns Hopkins CSSE. Baltimore, Maryland: Johns Hopkins University. |
| Bhutan                 | Johns Hopkins University. 2019 Novel Coronavirus COVID-19 (2019-nCoV) Data Repository by Johns Hopkins CSSE. Baltimore, Maryland: Johns Hopkins University. |
| Bolivia                | Johns Hopkins University. 2019 Novel Coronavirus COVID-19 (2019-nCoV) Data Repository by Johns Hopkins CSSE. Baltimore, Maryland: Johns Hopkins University. |
| Bosnia and Herzegovina | Johns Hopkins University. 2019 Novel Coronavirus COVID-19 (2019-nCoV) Data Repository by Johns Hopkins CSSE. Baltimore, Maryland: Johns Hopkins University. |
| Botswana               | Johns Hopkins University. 2019 Novel Coronavirus COVID-19 (2019-nCoV) Data Repository by Johns Hopkins CSSE. Baltimore, Maryland: Johns Hopkins University. |
| Brazil, Acre           | Ministry of Health (Brazil). Brazil Ministry of Health COVID-19 Coronavirus Panel. Rio de Janeiro, Brazil: Ministry of Health (Brazil).                     |

|                            |                                                                                                                                         |
|----------------------------|-----------------------------------------------------------------------------------------------------------------------------------------|
| Brazil, Alagoas            | Ministry of Health (Brazil). Brazil Ministry of Health COVID-19 Coronavirus Panel. Rio de Janeiro, Brazil: Ministry of Health (Brazil). |
| Brazil, Amapá              | Ministry of Health (Brazil). Brazil Ministry of Health COVID-19 Coronavirus Panel. Rio de Janeiro, Brazil: Ministry of Health (Brazil). |
| Brazil, Amazonas           | Ministry of Health (Brazil). Brazil Ministry of Health COVID-19 Coronavirus Panel. Rio de Janeiro, Brazil: Ministry of Health (Brazil). |
| Brazil, Bahia              | Ministry of Health (Brazil). Brazil Ministry of Health COVID-19 Coronavirus Panel. Rio de Janeiro, Brazil: Ministry of Health (Brazil). |
| Brazil, Ceará              | Ministry of Health (Brazil). Brazil Ministry of Health COVID-19 Coronavirus Panel. Rio de Janeiro, Brazil: Ministry of Health (Brazil). |
| Brazil, Distrito Federal   | Ministry of Health (Brazil). Brazil Ministry of Health COVID-19 Coronavirus Panel. Rio de Janeiro, Brazil: Ministry of Health (Brazil). |
| Brazil, Espírito Santo     | Ministry of Health (Brazil). Brazil Ministry of Health COVID-19 Coronavirus Panel. Rio de Janeiro, Brazil: Ministry of Health (Brazil). |
| Brazil, Goiás              | Ministry of Health (Brazil). Brazil Ministry of Health COVID-19 Coronavirus Panel. Rio de Janeiro, Brazil: Ministry of Health (Brazil). |
| Brazil, Maranhão           | Ministry of Health (Brazil). Brazil Ministry of Health COVID-19 Coronavirus Panel. Rio de Janeiro, Brazil: Ministry of Health (Brazil). |
| Brazil, Mato Grosso        | Ministry of Health (Brazil). Brazil Ministry of Health COVID-19 Coronavirus Panel. Rio de Janeiro, Brazil: Ministry of Health (Brazil). |
| Brazil, Mato Grosso do Sul | Ministry of Health (Brazil). Brazil Ministry of Health COVID-19 Coronavirus Panel. Rio de Janeiro, Brazil: Ministry of Health (Brazil). |
| Brazil, Minas Gerais       | Ministry of Health (Brazil). Brazil Ministry of Health COVID-19 Coronavirus Panel. Rio de Janeiro, Brazil: Ministry of Health (Brazil). |
| Brazil, Pará               | Ministry of Health (Brazil). Brazil Ministry of Health COVID-19 Coronavirus Panel. Rio de Janeiro, Brazil: Ministry of Health (Brazil). |
| Brazil, Paraíba            | Ministry of Health (Brazil). Brazil Ministry of Health COVID-19 Coronavirus Panel. Rio de Janeiro, Brazil: Ministry of Health (Brazil). |
| Brazil, Paraná             | Ministry of Health (Brazil). Brazil Ministry of Health COVID-19 Coronavirus Panel. Rio de Janeiro, Brazil: Ministry of Health (Brazil). |
| Brazil, Pernambuco         | Ministry of Health (Brazil). Brazil Ministry of Health COVID-19 Coronavirus Panel. Rio de Janeiro, Brazil: Ministry of Health (Brazil). |
| Brazil, Piauí              | Ministry of Health (Brazil). Brazil Ministry of Health COVID-19 Coronavirus Panel. Rio de Janeiro, Brazil: Ministry of Health (Brazil). |

|                             |                                                                                                                                                             |
|-----------------------------|-------------------------------------------------------------------------------------------------------------------------------------------------------------|
| Brazil, Rio de Janeiro      | Ministry of Health (Brazil). Brazil Ministry of Health COVID-19 Coronavirus Panel. Rio de Janeiro, Brazil: Ministry of Health (Brazil).                     |
| Brazil, Rio Grande do Norte | Ministry of Health (Brazil). Brazil Ministry of Health COVID-19 Coronavirus Panel. Rio de Janeiro, Brazil: Ministry of Health (Brazil).                     |
| Brazil, Rio Grande do Sul   | Ministry of Health (Brazil). Brazil Ministry of Health COVID-19 Coronavirus Panel. Rio de Janeiro, Brazil: Ministry of Health (Brazil).                     |
| Brazil, Rondônia            | Ministry of Health (Brazil). Brazil Ministry of Health COVID-19 Coronavirus Panel. Rio de Janeiro, Brazil: Ministry of Health (Brazil).                     |
| Brazil, Roraima             | Ministry of Health (Brazil). Brazil Ministry of Health COVID-19 Coronavirus Panel. Rio de Janeiro, Brazil: Ministry of Health (Brazil).                     |
| Brazil, Santa Catarina      | Ministry of Health (Brazil). Brazil Ministry of Health COVID-19 Coronavirus Panel. Rio de Janeiro, Brazil: Ministry of Health (Brazil).                     |
| Brazil, São Paulo           | Ministry of Health (Brazil). Brazil Ministry of Health COVID-19 Coronavirus Panel. Rio de Janeiro, Brazil: Ministry of Health (Brazil).                     |
| Brazil, Sergipe             | Ministry of Health (Brazil). Brazil Ministry of Health COVID-19 Coronavirus Panel. Rio de Janeiro, Brazil: Ministry of Health (Brazil).                     |
| Brazil, Tocantins           | Ministry of Health (Brazil). Brazil Ministry of Health COVID-19 Coronavirus Panel. Rio de Janeiro, Brazil: Ministry of Health (Brazil).                     |
| Brunei                      | Johns Hopkins University. 2019 Novel Coronavirus COVID-19 (2019-nCoV) Data Repository by Johns Hopkins CSSE. Baltimore, Maryland: Johns Hopkins University. |
| Bulgaria                    | Johns Hopkins University. 2019 Novel Coronavirus COVID-19 (2019-nCoV) Data Repository by Johns Hopkins CSSE. Baltimore, Maryland: Johns Hopkins University. |
| Burkina Faso                | Johns Hopkins University. 2019 Novel Coronavirus COVID-19 (2019-nCoV) Data Repository by Johns Hopkins CSSE. Baltimore, Maryland: Johns Hopkins University. |
| Burundi                     | Johns Hopkins University. 2019 Novel Coronavirus COVID-19 (2019-nCoV) Data Repository by Johns Hopkins CSSE. Baltimore, Maryland: Johns Hopkins University. |
| Cambodia                    | Johns Hopkins University. 2019 Novel Coronavirus COVID-19 (2019-nCoV) Data Repository by Johns Hopkins CSSE. Baltimore, Maryland: Johns Hopkins University. |
| Cameroon                    | Johns Hopkins University. 2019 Novel Coronavirus COVID-19 (2019-nCoV) Data Repository by Johns Hopkins CSSE. Baltimore, Maryland: Johns Hopkins University. |
| Canada, Alberta             | Government of Canada. Canada Public Health Infobase Number of Total Cases of COVID-19. Ottawa, Canada: Government of Canada.                                |
| Canada, Alberta             | Government of Canada. Canada Coronavirus Disease 2019 (COVID-19) Daily Epidemiology Update. Ottawa, Canada: Government of Canada.                           |

|                                   |                                                                                                                                   |
|-----------------------------------|-----------------------------------------------------------------------------------------------------------------------------------|
| Canada, British Columbia          | Government of Canada. Canada Public Health Infobase Number of Total Cases of COVID-19. Ottawa, Canada: Government of Canada.      |
| Canada, British Columbia          | Government of Canada. Canada Coronavirus Disease 2019 (COVID-19) Daily Epidemiology Update. Ottawa, Canada: Government of Canada. |
| Canada, Manitoba                  | Government of Canada. Canada Public Health Infobase Number of Total Cases of COVID-19. Ottawa, Canada: Government of Canada.      |
| Canada, Manitoba                  | Government of Canada. Canada Coronavirus Disease 2019 (COVID-19) Daily Epidemiology Update. Ottawa, Canada: Government of Canada. |
| Canada, New Brunswick             | Government of Canada. Canada Public Health Infobase Number of Total Cases of COVID-19. Ottawa, Canada: Government of Canada.      |
| Canada, New Brunswick             | Government of Canada. Canada Coronavirus Disease 2019 (COVID-19) Daily Epidemiology Update. Ottawa, Canada: Government of Canada. |
| Canada, Newfoundland and Labrador | Government of Canada. Canada Public Health Infobase Number of Total Cases of COVID-19. Ottawa, Canada: Government of Canada.      |
| Canada, Newfoundland and Labrador | Government of Canada. Canada Coronavirus Disease 2019 (COVID-19) Daily Epidemiology Update. Ottawa, Canada: Government of Canada. |
| Canada, Northwest Territories     | Government of Canada. Canada Public Health Infobase Number of Total Cases of COVID-19. Ottawa, Canada: Government of Canada.      |
| Canada, Northwest Territories     | Government of Canada. Canada Coronavirus Disease 2019 (COVID-19) Daily Epidemiology Update. Ottawa, Canada: Government of Canada. |
| Canada, Nova Scotia               | Government of Canada. Canada Public Health Infobase Number of Total Cases of COVID-19. Ottawa, Canada: Government of Canada.      |
| Canada, Nova Scotia               | Government of Canada. Canada Coronavirus Disease 2019 (COVID-19) Daily Epidemiology Update. Ottawa, Canada: Government of Canada. |
| Canada, Nunavut                   | Government of Canada. Canada Public Health Infobase Number of Total Cases of COVID-19. Ottawa, Canada: Government of Canada.      |
| Canada, Nunavut                   | Government of Canada. Canada Coronavirus Disease 2019 (COVID-19) Daily Epidemiology Update. Ottawa, Canada: Government of Canada. |
| Canada, Ontario                   | Government of Canada. Canada Public Health Infobase Number of Total Cases of COVID-19. Ottawa, Canada: Government of Canada.      |
| Canada, Ontario                   | Government of Canada. Canada Coronavirus Disease 2019 (COVID-19) Daily Epidemiology Update. Ottawa, Canada: Government of Canada. |
| Canada, Prince Edward Island      | Government of Canada. Canada Public Health Infobase Number of Total Cases of COVID-19. Ottawa, Canada: Government of Canada.      |

|                              |                                                                                                                                                             |
|------------------------------|-------------------------------------------------------------------------------------------------------------------------------------------------------------|
| Canada, Prince Edward Island | Government of Canada. Canada Coronavirus Disease 2019 (COVID-19) Daily Epidemiology Update. Ottawa, Canada: Government of Canada.                           |
| Canada, Quebec               | Government of Canada. Canada Public Health Infobase Number of Total Cases of COVID-19. Ottawa, Canada: Government of Canada.                                |
| Canada, Quebec               | Government of Canada. Canada Coronavirus Disease 2019 (COVID-19) Daily Epidemiology Update. Ottawa, Canada: Government of Canada.                           |
| Canada, Saskatchewan         | Government of Canada. Canada Public Health Infobase Number of Total Cases of COVID-19. Ottawa, Canada: Government of Canada.                                |
| Canada, Saskatchewan         | Government of Canada. Canada Coronavirus Disease 2019 (COVID-19) Daily Epidemiology Update. Ottawa, Canada: Government of Canada.                           |
| Canada, Yukon                | Government of Canada. Canada Public Health Infobase Number of Total Cases of COVID-19. Ottawa, Canada: Government of Canada.                                |
| Canada, Yukon                | Government of Canada. Canada Coronavirus Disease 2019 (COVID-19) Daily Epidemiology Update. Ottawa, Canada: Government of Canada.                           |
| Cape Verde                   | Johns Hopkins University. 2019 Novel Coronavirus COVID-19 (2019-nCoV) Data Repository by Johns Hopkins CSSE. Baltimore, Maryland: Johns Hopkins University. |
| Central African Republic     | Johns Hopkins University. 2019 Novel Coronavirus COVID-19 (2019-nCoV) Data Repository by Johns Hopkins CSSE. Baltimore, Maryland: Johns Hopkins University. |
| Chad                         | Johns Hopkins University. 2019 Novel Coronavirus COVID-19 (2019-nCoV) Data Repository by Johns Hopkins CSSE. Baltimore, Maryland: Johns Hopkins University. |
| Chile                        | Johns Hopkins University. 2019 Novel Coronavirus COVID-19 (2019-nCoV) Data Repository by Johns Hopkins CSSE. Baltimore, Maryland: Johns Hopkins University. |
| China, Anhui                 | Johns Hopkins University. 2019 Novel Coronavirus COVID-19 (2019-nCoV) Data Repository by Johns Hopkins CSSE. Baltimore, Maryland: Johns Hopkins University. |
| China, Beijing               | Johns Hopkins University. 2019 Novel Coronavirus COVID-19 (2019-nCoV) Data Repository by Johns Hopkins CSSE. Baltimore, Maryland: Johns Hopkins University. |
| China, Chongqing             | Johns Hopkins University. 2019 Novel Coronavirus COVID-19 (2019-nCoV) Data Repository by Johns Hopkins CSSE. Baltimore, Maryland: Johns Hopkins University. |
| China, Fujian                | Johns Hopkins University. 2019 Novel Coronavirus COVID-19 (2019-nCoV) Data Repository by Johns Hopkins CSSE. Baltimore, Maryland: Johns Hopkins University. |
| China, Gansu                 | Johns Hopkins University. 2019 Novel Coronavirus COVID-19 (2019-nCoV) Data Repository by Johns Hopkins CSSE. Baltimore, Maryland: Johns Hopkins University. |
| China, Guangdong             | Johns Hopkins University. 2019 Novel Coronavirus COVID-19 (2019-nCoV) Data Repository by Johns Hopkins CSSE. Baltimore, Maryland: Johns Hopkins University. |

|                                                         |                                                                                                                                                             |
|---------------------------------------------------------|-------------------------------------------------------------------------------------------------------------------------------------------------------------|
| China, Guangxi                                          | Johns Hopkins University. 2019 Novel Coronavirus COVID-19 (2019-nCoV) Data Repository by Johns Hopkins CSSE. Baltimore, Maryland: Johns Hopkins University. |
| China, Guizhou                                          | Johns Hopkins University. 2019 Novel Coronavirus COVID-19 (2019-nCoV) Data Repository by Johns Hopkins CSSE. Baltimore, Maryland: Johns Hopkins University. |
| China, Hainan                                           | Johns Hopkins University. 2019 Novel Coronavirus COVID-19 (2019-nCoV) Data Repository by Johns Hopkins CSSE. Baltimore, Maryland: Johns Hopkins University. |
| China, Hebei                                            | Johns Hopkins University. 2019 Novel Coronavirus COVID-19 (2019-nCoV) Data Repository by Johns Hopkins CSSE. Baltimore, Maryland: Johns Hopkins University. |
| China, Heilongjiang                                     | Johns Hopkins University. 2019 Novel Coronavirus COVID-19 (2019-nCoV) Data Repository by Johns Hopkins CSSE. Baltimore, Maryland: Johns Hopkins University. |
| China, Henan                                            | Johns Hopkins University. 2019 Novel Coronavirus COVID-19 (2019-nCoV) Data Repository by Johns Hopkins CSSE. Baltimore, Maryland: Johns Hopkins University. |
| China, Hong Kong Special Administrative Region of China | Johns Hopkins University. 2019 Novel Coronavirus COVID-19 (2019-nCoV) Data Repository by Johns Hopkins CSSE. Baltimore, Maryland: Johns Hopkins University. |
| China, Hubei                                            | Johns Hopkins University. 2019 Novel Coronavirus COVID-19 (2019-nCoV) Data Repository by Johns Hopkins CSSE. Baltimore, Maryland: Johns Hopkins University. |
| China, Hunan                                            | Johns Hopkins University. 2019 Novel Coronavirus COVID-19 (2019-nCoV) Data Repository by Johns Hopkins CSSE. Baltimore, Maryland: Johns Hopkins University. |
| China, Inner Mongolia                                   | Johns Hopkins University. 2019 Novel Coronavirus COVID-19 (2019-nCoV) Data Repository by Johns Hopkins CSSE. Baltimore, Maryland: Johns Hopkins University. |
| China, Jiangsu                                          | Johns Hopkins University. 2019 Novel Coronavirus COVID-19 (2019-nCoV) Data Repository by Johns Hopkins CSSE. Baltimore, Maryland: Johns Hopkins University. |
| China, Jiangxi                                          | Johns Hopkins University. 2019 Novel Coronavirus COVID-19 (2019-nCoV) Data Repository by Johns Hopkins CSSE. Baltimore, Maryland: Johns Hopkins University. |
| China, Jilin                                            | Johns Hopkins University. 2019 Novel Coronavirus COVID-19 (2019-nCoV) Data Repository by Johns Hopkins CSSE. Baltimore, Maryland: Johns Hopkins University. |
| China, Liaoning                                         | Johns Hopkins University. 2019 Novel Coronavirus COVID-19 (2019-nCoV) Data Repository by Johns Hopkins CSSE. Baltimore, Maryland: Johns Hopkins University. |
| China, Macao Special Administrative Region of China     | Johns Hopkins University. 2019 Novel Coronavirus COVID-19 (2019-nCoV) Data Repository by Johns Hopkins CSSE. Baltimore, Maryland: Johns Hopkins University. |
| China, Ningxia                                          | Johns Hopkins University. 2019 Novel Coronavirus COVID-19 (2019-nCoV) Data Repository by Johns Hopkins CSSE. Baltimore, Maryland: Johns Hopkins University. |
| China, Qinghai                                          | Johns Hopkins University. 2019 Novel Coronavirus COVID-19 (2019-nCoV) Data Repository by Johns Hopkins CSSE. Baltimore, Maryland: Johns Hopkins University. |

|                     |                                                                                                                                                             |
|---------------------|-------------------------------------------------------------------------------------------------------------------------------------------------------------|
| China, Shaanxi      | Johns Hopkins University. 2019 Novel Coronavirus COVID-19 (2019-nCoV) Data Repository by Johns Hopkins CSSE. Baltimore, Maryland: Johns Hopkins University. |
| China, Shandong     | Johns Hopkins University. 2019 Novel Coronavirus COVID-19 (2019-nCoV) Data Repository by Johns Hopkins CSSE. Baltimore, Maryland: Johns Hopkins University. |
| China, Shanghai     | Johns Hopkins University. 2019 Novel Coronavirus COVID-19 (2019-nCoV) Data Repository by Johns Hopkins CSSE. Baltimore, Maryland: Johns Hopkins University. |
| China, Shanxi       | Johns Hopkins University. 2019 Novel Coronavirus COVID-19 (2019-nCoV) Data Repository by Johns Hopkins CSSE. Baltimore, Maryland: Johns Hopkins University. |
| China, Sichuan      | Johns Hopkins University. 2019 Novel Coronavirus COVID-19 (2019-nCoV) Data Repository by Johns Hopkins CSSE. Baltimore, Maryland: Johns Hopkins University. |
| China, Tianjin      | Johns Hopkins University. 2019 Novel Coronavirus COVID-19 (2019-nCoV) Data Repository by Johns Hopkins CSSE. Baltimore, Maryland: Johns Hopkins University. |
| China, Tibet        | Johns Hopkins University. 2019 Novel Coronavirus COVID-19 (2019-nCoV) Data Repository by Johns Hopkins CSSE. Baltimore, Maryland: Johns Hopkins University. |
| China, Xinjiang     | Johns Hopkins University. 2019 Novel Coronavirus COVID-19 (2019-nCoV) Data Repository by Johns Hopkins CSSE. Baltimore, Maryland: Johns Hopkins University. |
| China, Yunnan       | Johns Hopkins University. 2019 Novel Coronavirus COVID-19 (2019-nCoV) Data Repository by Johns Hopkins CSSE. Baltimore, Maryland: Johns Hopkins University. |
| China, Zhejiang     | Johns Hopkins University. 2019 Novel Coronavirus COVID-19 (2019-nCoV) Data Repository by Johns Hopkins CSSE. Baltimore, Maryland: Johns Hopkins University. |
| Colombia            | Johns Hopkins University. 2019 Novel Coronavirus COVID-19 (2019-nCoV) Data Repository by Johns Hopkins CSSE. Baltimore, Maryland: Johns Hopkins University. |
| Comoros             | Johns Hopkins University. 2019 Novel Coronavirus COVID-19 (2019-nCoV) Data Repository by Johns Hopkins CSSE. Baltimore, Maryland: Johns Hopkins University. |
| Congo (Brazzaville) | Johns Hopkins University. 2019 Novel Coronavirus COVID-19 (2019-nCoV) Data Repository by Johns Hopkins CSSE. Baltimore, Maryland: Johns Hopkins University. |
| Costa Rica          | Johns Hopkins University. 2019 Novel Coronavirus COVID-19 (2019-nCoV) Data Repository by Johns Hopkins CSSE. Baltimore, Maryland: Johns Hopkins University. |
| Côte d'Ivoire       | Johns Hopkins University. 2019 Novel Coronavirus COVID-19 (2019-nCoV) Data Repository by Johns Hopkins CSSE. Baltimore, Maryland: Johns Hopkins University. |
| Croatia             | Johns Hopkins University. 2019 Novel Coronavirus COVID-19 (2019-nCoV) Data Repository by Johns Hopkins CSSE. Baltimore, Maryland: Johns Hopkins University. |
| Cuba                | Johns Hopkins University. 2019 Novel Coronavirus COVID-19 (2019-nCoV) Data Repository by Johns Hopkins CSSE. Baltimore, Maryland: Johns Hopkins University. |



|                                |                                                                                                                                                             |
|--------------------------------|-------------------------------------------------------------------------------------------------------------------------------------------------------------|
| Cyprus                         | Johns Hopkins University. 2019 Novel Coronavirus COVID-19 (2019-nCoV) Data Repository by Johns Hopkins CSSE. Baltimore, Maryland: Johns Hopkins University. |
| Czechia                        | Johns Hopkins University. 2019 Novel Coronavirus COVID-19 (2019-nCoV) Data Repository by Johns Hopkins CSSE. Baltimore, Maryland: Johns Hopkins University. |
| Denmark                        | Johns Hopkins University. 2019 Novel Coronavirus COVID-19 (2019-nCoV) Data Repository by Johns Hopkins CSSE. Baltimore, Maryland: Johns Hopkins University. |
| Djibouti                       | Johns Hopkins University. 2019 Novel Coronavirus COVID-19 (2019-nCoV) Data Repository by Johns Hopkins CSSE. Baltimore, Maryland: Johns Hopkins University. |
| Dominica                       | Johns Hopkins University. 2019 Novel Coronavirus COVID-19 (2019-nCoV) Data Repository by Johns Hopkins CSSE. Baltimore, Maryland: Johns Hopkins University. |
| Dominican Republic             | Johns Hopkins University. 2019 Novel Coronavirus COVID-19 (2019-nCoV) Data Repository by Johns Hopkins CSSE. Baltimore, Maryland: Johns Hopkins University. |
| DR Congo                       | Johns Hopkins University. 2019 Novel Coronavirus COVID-19 (2019-nCoV) Data Repository by Johns Hopkins CSSE. Baltimore, Maryland: Johns Hopkins University. |
| Ecuador                        | Johns Hopkins University. 2019 Novel Coronavirus COVID-19 (2019-nCoV) Data Repository by Johns Hopkins CSSE. Baltimore, Maryland: Johns Hopkins University. |
| Egypt                          | Johns Hopkins University. 2019 Novel Coronavirus COVID-19 (2019-nCoV) Data Repository by Johns Hopkins CSSE. Baltimore, Maryland: Johns Hopkins University. |
| El Salvador                    | Johns Hopkins University. 2019 Novel Coronavirus COVID-19 (2019-nCoV) Data Repository by Johns Hopkins CSSE. Baltimore, Maryland: Johns Hopkins University. |
| Equatorial Guinea              | Johns Hopkins University. 2019 Novel Coronavirus COVID-19 (2019-nCoV) Data Repository by Johns Hopkins CSSE. Baltimore, Maryland: Johns Hopkins University. |
| Eritrea                        | Johns Hopkins University. 2019 Novel Coronavirus COVID-19 (2019-nCoV) Data Repository by Johns Hopkins CSSE. Baltimore, Maryland: Johns Hopkins University. |
| Estonia                        | Johns Hopkins University. 2019 Novel Coronavirus COVID-19 (2019-nCoV) Data Repository by Johns Hopkins CSSE. Baltimore, Maryland: Johns Hopkins University. |
| Eswatini                       | Johns Hopkins University. 2019 Novel Coronavirus COVID-19 (2019-nCoV) Data Repository by Johns Hopkins CSSE. Baltimore, Maryland: Johns Hopkins University. |
| Ethiopia                       | Johns Hopkins University. 2019 Novel Coronavirus COVID-19 (2019-nCoV) Data Repository by Johns Hopkins CSSE. Baltimore, Maryland: Johns Hopkins University. |
| Federated States of Micronesia | Johns Hopkins University. 2019 Novel Coronavirus COVID-19 (2019-nCoV) Data Repository by Johns Hopkins CSSE. Baltimore, Maryland: Johns Hopkins University. |
| Fiji                           | Johns Hopkins University. 2019 Novel Coronavirus COVID-19 (2019-nCoV) Data Repository by Johns Hopkins CSSE. Baltimore, Maryland: Johns Hopkins University. |

|                            |                                                                                                                                                             |
|----------------------------|-------------------------------------------------------------------------------------------------------------------------------------------------------------|
| Finland                    | Johns Hopkins University. 2019 Novel Coronavirus COVID-19 (2019-nCoV) Data Repository by Johns Hopkins CSSE. Baltimore, Maryland: Johns Hopkins University. |
| France                     | Etalab (France), Ministry of Health (France), Ministry of Health and Solidarity (DRESS) (France). France COVID-19 Epidemic Monitoring Dashboard.            |
| Gabon                      | Johns Hopkins University. 2019 Novel Coronavirus COVID-19 (2019-nCoV) Data Repository by Johns Hopkins CSSE. Baltimore, Maryland: Johns Hopkins University. |
| Georgia                    | Johns Hopkins University. 2019 Novel Coronavirus COVID-19 (2019-nCoV) Data Repository by Johns Hopkins CSSE. Baltimore, Maryland: Johns Hopkins University. |
| Germany, Baden-Württemberg | Robert Koch Institute. Coronavirus Disease 2019 (COVID-19) Daily Situation Report - Robert Koch Institute. Berlin, Germany: Robert Koch Institute.          |
| Germany, Baden-Württemberg | Wikipedia. COVID-19 pandemic in Germany. San Francisco, United States of America: Wikipedia.                                                                |
| Germany, Bavaria           | Robert Koch Institute. Coronavirus Disease 2019 (COVID-19) Daily Situation Report - Robert Koch Institute. Berlin, Germany: Robert Koch Institute.          |
| Germany, Bavaria           | Wikipedia. COVID-19 pandemic in Germany. San Francisco, United States of America: Wikipedia.                                                                |
| Germany, Berlin            | Robert Koch Institute. Coronavirus Disease 2019 (COVID-19) Daily Situation Report - Robert Koch Institute. Berlin, Germany: Robert Koch Institute.          |
| Germany, Berlin            | Wikipedia. COVID-19 pandemic in Germany. San Francisco, United States of America: Wikipedia.                                                                |
| Germany, Brandenburg       | Robert Koch Institute. Coronavirus Disease 2019 (COVID-19) Daily Situation Report - Robert Koch Institute. Berlin, Germany: Robert Koch Institute.          |
| Germany, Brandenburg       | Wikipedia. COVID-19 pandemic in Germany. San Francisco, United States of America: Wikipedia.                                                                |
| Germany, Bremen            | Robert Koch Institute. Coronavirus Disease 2019 (COVID-19) Daily Situation Report - Robert Koch Institute. Berlin, Germany: Robert Koch Institute.          |
| Germany, Bremen            | Wikipedia. COVID-19 pandemic in Germany. San Francisco, United States of America: Wikipedia.                                                                |
| Germany, Hamburg           | Robert Koch Institute. Coronavirus Disease 2019 (COVID-19) Daily Situation Report - Robert Koch Institute. Berlin, Germany: Robert Koch Institute.          |
| Germany, Hamburg           | Wikipedia. COVID-19 pandemic in Germany. San Francisco, United States of America: Wikipedia.                                                                |
| Germany, Hesse             | Robert Koch Institute. Coronavirus Disease 2019 (COVID-19) Daily Situation Report - Robert Koch Institute. Berlin, Germany: Robert Koch Institute.          |
| Germany, Hesse             | Wikipedia. COVID-19 pandemic in Germany. San Francisco, United States of America: Wikipedia.                                                                |

|                                 |                                                                                                                                                    |
|---------------------------------|----------------------------------------------------------------------------------------------------------------------------------------------------|
| Germany, Lower Saxony           | Robert Koch Institute. Coronavirus Disease 2019 (COVID-19) Daily Situation Report - Robert Koch Institute. Berlin, Germany: Robert Koch Institute. |
| Germany, Lower Saxony           | Wikipedia. COVID-19 pandemic in Germany. San Francisco, United States of America: Wikipedia.                                                       |
| Germany, Mecklenburg-Vorpommern | Robert Koch Institute. Coronavirus Disease 2019 (COVID-19) Daily Situation Report - Robert Koch Institute. Berlin, Germany: Robert Koch Institute. |
| Germany, Mecklenburg-Vorpommern | Wikipedia. COVID-19 pandemic in Germany. San Francisco, United States of America: Wikipedia.                                                       |
| Germany, North Rhine-Westphalia | Robert Koch Institute. Coronavirus Disease 2019 (COVID-19) Daily Situation Report - Robert Koch Institute. Berlin, Germany: Robert Koch Institute. |
| Germany, North Rhine-Westphalia | Wikipedia. COVID-19 pandemic in Germany. San Francisco, United States of America: Wikipedia.                                                       |
| Germany, Rhineland-Palatinate   | Robert Koch Institute. Coronavirus Disease 2019 (COVID-19) Daily Situation Report - Robert Koch Institute. Berlin, Germany: Robert Koch Institute. |
| Germany, Rhineland-Palatinate   | Wikipedia. COVID-19 pandemic in Germany. San Francisco, United States of America: Wikipedia.                                                       |
| Germany, Saarland               | Robert Koch Institute. Coronavirus Disease 2019 (COVID-19) Daily Situation Report - Robert Koch Institute. Berlin, Germany: Robert Koch Institute. |
| Germany, Saarland               | Wikipedia. COVID-19 pandemic in Germany. San Francisco, United States of America: Wikipedia.                                                       |
| Germany, Saxony                 | Robert Koch Institute. Coronavirus Disease 2019 (COVID-19) Daily Situation Report - Robert Koch Institute. Berlin, Germany: Robert Koch Institute. |
| Germany, Saxony                 | Wikipedia. COVID-19 pandemic in Germany. San Francisco, United States of America: Wikipedia.                                                       |
| Germany, Saxony-Anhalt          | Robert Koch Institute. Coronavirus Disease 2019 (COVID-19) Daily Situation Report - Robert Koch Institute. Berlin, Germany: Robert Koch Institute. |
| Germany, Saxony-Anhalt          | Wikipedia. COVID-19 pandemic in Germany. San Francisco, United States of America: Wikipedia.                                                       |
| Germany, Schleswig-Holstein     | Robert Koch Institute. Coronavirus Disease 2019 (COVID-19) Daily Situation Report - Robert Koch Institute. Berlin, Germany: Robert Koch Institute. |
| Germany, Schleswig-Holstein     | Wikipedia. COVID-19 pandemic in Germany. San Francisco, United States of America: Wikipedia.                                                       |
| Germany, Thuringia              | Robert Koch Institute. Coronavirus Disease 2019 (COVID-19) Daily Situation Report - Robert Koch Institute. Berlin, Germany: Robert Koch Institute. |
| Germany, Thuringia              | Wikipedia. COVID-19 pandemic in Germany. San Francisco, United States of America: Wikipedia.                                                       |

|                          |                                                                                                                                                             |
|--------------------------|-------------------------------------------------------------------------------------------------------------------------------------------------------------|
| Ghana                    | Johns Hopkins University. 2019 Novel Coronavirus COVID-19 (2019-nCoV) Data Repository by Johns Hopkins CSSE. Baltimore, Maryland: Johns Hopkins University. |
| Greece                   | Johns Hopkins University. 2019 Novel Coronavirus COVID-19 (2019-nCoV) Data Repository by Johns Hopkins CSSE. Baltimore, Maryland: Johns Hopkins University. |
| Greenland                | Johns Hopkins University. 2019 Novel Coronavirus COVID-19 (2019-nCoV) Data Repository by Johns Hopkins CSSE. Baltimore, Maryland: Johns Hopkins University. |
| Grenada                  | Johns Hopkins University. 2019 Novel Coronavirus COVID-19 (2019-nCoV) Data Repository by Johns Hopkins CSSE. Baltimore, Maryland: Johns Hopkins University. |
| Guam                     | Johns Hopkins University. 2019 Novel Coronavirus COVID-19 (2019-nCoV) Data Repository by Johns Hopkins CSSE. Baltimore, Maryland: Johns Hopkins University. |
| Guatemala                | Ministerio de Salud Publica y Asistencia Social. Situacion de COVID-19 en Guatemala. Gobierno de Guatemala                                                  |
| Guinea                   | Johns Hopkins University. 2019 Novel Coronavirus COVID-19 (2019-nCoV) Data Repository by Johns Hopkins CSSE. Baltimore, Maryland: Johns Hopkins University. |
| Guinea-Bissau            | Johns Hopkins University. 2019 Novel Coronavirus COVID-19 (2019-nCoV) Data Repository by Johns Hopkins CSSE. Baltimore, Maryland: Johns Hopkins University. |
| Guyana                   | Johns Hopkins University. 2019 Novel Coronavirus COVID-19 (2019-nCoV) Data Repository by Johns Hopkins CSSE. Baltimore, Maryland: Johns Hopkins University. |
| Haiti                    | Johns Hopkins University. 2019 Novel Coronavirus COVID-19 (2019-nCoV) Data Repository by Johns Hopkins CSSE. Baltimore, Maryland: Johns Hopkins University. |
| Honduras                 | Johns Hopkins University. 2019 Novel Coronavirus COVID-19 (2019-nCoV) Data Repository by Johns Hopkins CSSE. Baltimore, Maryland: Johns Hopkins University. |
| Hungary                  | Johns Hopkins University. 2019 Novel Coronavirus COVID-19 (2019-nCoV) Data Repository by Johns Hopkins CSSE. Baltimore, Maryland: Johns Hopkins University. |
| Iceland                  | Johns Hopkins University. 2019 Novel Coronavirus COVID-19 (2019-nCoV) Data Repository by Johns Hopkins CSSE. Baltimore, Maryland: Johns Hopkins University. |
| India, Andhra Pradesh    | COVID-19 India. India COVID-19 Crowdsourced Patient Database: National Level Time Series, State-Wise Stats and Test Counts. India: COVID-19 India.          |
| India, Andhra Pradesh    | COVID-19 India. India COVID-19 Crowdsourced Patient Database: State Level Daily Changes. India: COVID-19 India.                                             |
| India, Arunachal Pradesh | COVID-19 India. India COVID-19 Crowdsourced Patient Database: National Level Time Series, State-Wise Stats and Test Counts. India: COVID-19 India.          |
| India, Arunachal Pradesh | COVID-19 India. India COVID-19 Crowdsourced Patient Database: State Level Daily Changes. India: COVID-19 India.                                             |

|                                                 |                                                                                                                                                    |
|-------------------------------------------------|----------------------------------------------------------------------------------------------------------------------------------------------------|
| India, Assam                                    | COVID-19 India. India COVID-19 Crowdsourced Patient Database: National Level Time Series, State-Wise Stats and Test Counts. India: COVID-19 India. |
| India, Assam                                    | COVID-19 India. India COVID-19 Crowdsourced Patient Database: State Level Daily Changes. India: COVID-19 India.                                    |
| India, Bihar                                    | COVID-19 India. India COVID-19 Crowdsourced Patient Database: National Level Time Series, State-Wise Stats and Test Counts. India: COVID-19 India. |
| India, Bihar                                    | COVID-19 India. India COVID-19 Crowdsourced Patient Database: State Level Daily Changes. India: COVID-19 India.                                    |
| India, Chhattisgarh                             | COVID-19 India. India COVID-19 Crowdsourced Patient Database: National Level Time Series, State-Wise Stats and Test Counts. India: COVID-19 India. |
| India, Chhattisgarh                             | COVID-19 India. India COVID-19 Crowdsourced Patient Database: State Level Daily Changes. India: COVID-19 India.                                    |
| India, Dadra and Nagar Haveli and Daman and Diu | COVID-19 India. India COVID-19 Crowdsourced Patient Database: National Level Time Series, State-Wise Stats and Test Counts. India: COVID-19 India. |
| India, Dadra and Nagar Haveli and Daman and Diu | COVID-19 India. India COVID-19 Crowdsourced Patient Database: State Level Daily Changes. India: COVID-19 India.                                    |
| India, Delhi                                    | COVID-19 India. India COVID-19 Crowdsourced Patient Database: National Level Time Series, State-Wise Stats and Test Counts. India: COVID-19 India. |
| India, Delhi                                    | COVID-19 India. India COVID-19 Crowdsourced Patient Database: State Level Daily Changes. India: COVID-19 India.                                    |
| India, Goa                                      | COVID-19 India. India COVID-19 Crowdsourced Patient Database: National Level Time Series, State-Wise Stats and Test Counts. India: COVID-19 India. |
| India, Goa                                      | COVID-19 India. India COVID-19 Crowdsourced Patient Database: State Level Daily Changes. India: COVID-19 India.                                    |
| India, Gujarat                                  | COVID-19 India. India COVID-19 Crowdsourced Patient Database: National Level Time Series, State-Wise Stats and Test Counts. India: COVID-19 India. |
| India, Gujarat                                  | COVID-19 India. India COVID-19 Crowdsourced Patient Database: State Level Daily Changes. India: COVID-19 India.                                    |
| India, Haryana                                  | COVID-19 India. India COVID-19 Crowdsourced Patient Database: National Level Time Series, State-Wise Stats and Test Counts. India: COVID-19 India. |
| India, Haryana                                  | COVID-19 India. India COVID-19 Crowdsourced Patient Database: State Level Daily Changes. India: COVID-19 India.                                    |
| India, Himachal Pradesh                         | COVID-19 India. India COVID-19 Crowdsourced Patient Database: National Level Time Series, State-Wise Stats and Test Counts. India: COVID-19 India. |

|                                   |                                                                                                                                                    |
|-----------------------------------|----------------------------------------------------------------------------------------------------------------------------------------------------|
| India, Himachal Pradesh           | COVID-19 India. India COVID-19 Crowdsourced Patient Database: State Level Daily Changes. India: COVID-19 India.                                    |
| India, Jammu & Kashmir and Ladakh | COVID-19 India. India COVID-19 Crowdsourced Patient Database: National Level Time Series, State-Wise Stats and Test Counts. India: COVID-19 India. |
| India, Jammu & Kashmir and Ladakh | COVID-19 India. India COVID-19 Crowdsourced Patient Database: State Level Daily Changes. India: COVID-19 India.                                    |
| India, Jharkhand                  | COVID-19 India. India COVID-19 Crowdsourced Patient Database: National Level Time Series, State-Wise Stats and Test Counts. India: COVID-19 India. |
| India, Jharkhand                  | COVID-19 India. India COVID-19 Crowdsourced Patient Database: State Level Daily Changes. India: COVID-19 India.                                    |
| India, Karnataka                  | COVID-19 India. India COVID-19 Crowdsourced Patient Database: National Level Time Series, State-Wise Stats and Test Counts. India: COVID-19 India. |
| India, Karnataka                  | COVID-19 India. India COVID-19 Crowdsourced Patient Database: State Level Daily Changes. India: COVID-19 India.                                    |
| India, Kerala                     | COVID-19 India. India COVID-19 Crowdsourced Patient Database: National Level Time Series, State-Wise Stats and Test Counts. India: COVID-19 India. |
| India, Kerala                     | COVID-19 India. India COVID-19 Crowdsourced Patient Database: State Level Daily Changes. India: COVID-19 India.                                    |
| India, Madhya Pradesh             | COVID-19 India. India COVID-19 Crowdsourced Patient Database: National Level Time Series, State-Wise Stats and Test Counts. India: COVID-19 India. |
| India, Madhya Pradesh             | COVID-19 India. India COVID-19 Crowdsourced Patient Database: State Level Daily Changes. India: COVID-19 India.                                    |
| India, Maharashtra                | COVID-19 India. India COVID-19 Crowdsourced Patient Database: National Level Time Series, State-Wise Stats and Test Counts. India: COVID-19 India. |
| India, Maharashtra                | COVID-19 India. India COVID-19 Crowdsourced Patient Database: State Level Daily Changes. India: COVID-19 India.                                    |
| India, Manipur                    | COVID-19 India. India COVID-19 Crowdsourced Patient Database: National Level Time Series, State-Wise Stats and Test Counts. India: COVID-19 India. |
| India, Manipur                    | COVID-19 India. India COVID-19 Crowdsourced Patient Database: State Level Daily Changes. India: COVID-19 India.                                    |
| India, Meghalaya                  | COVID-19 India. India COVID-19 Crowdsourced Patient Database: National Level Time Series, State-Wise Stats and Test Counts. India: COVID-19 India. |
| India, Meghalaya                  | COVID-19 India. India COVID-19 Crowdsourced Patient Database: State Level Daily Changes. India: COVID-19 India.                                    |

|                   |                                                                                                                                                    |
|-------------------|----------------------------------------------------------------------------------------------------------------------------------------------------|
| India, Mizoram    | COVID-19 India. India COVID-19 Crowdsourced Patient Database: National Level Time Series, State-Wise Stats and Test Counts. India: COVID-19 India. |
| India, Mizoram    | COVID-19 India. India COVID-19 Crowdsourced Patient Database: State Level Daily Changes. India: COVID-19 India.                                    |
| India, Nagaland   | COVID-19 India. India COVID-19 Crowdsourced Patient Database: National Level Time Series, State-Wise Stats and Test Counts. India: COVID-19 India. |
| India, Nagaland   | COVID-19 India. India COVID-19 Crowdsourced Patient Database: State Level Daily Changes. India: COVID-19 India.                                    |
| India, Odisha     | COVID-19 India. India COVID-19 Crowdsourced Patient Database: National Level Time Series, State-Wise Stats and Test Counts. India: COVID-19 India. |
| India, Odisha     | COVID-19 India. India COVID-19 Crowdsourced Patient Database: State Level Daily Changes. India: COVID-19 India.                                    |
| India, Punjab     | COVID-19 India. India COVID-19 Crowdsourced Patient Database: National Level Time Series, State-Wise Stats and Test Counts. India: COVID-19 India. |
| India, Punjab     | COVID-19 India. India COVID-19 Crowdsourced Patient Database: State Level Daily Changes. India: COVID-19 India.                                    |
| India, Rajasthan  | COVID-19 India. India COVID-19 Crowdsourced Patient Database: National Level Time Series, State-Wise Stats and Test Counts. India: COVID-19 India. |
| India, Rajasthan  | COVID-19 India. India COVID-19 Crowdsourced Patient Database: State Level Daily Changes. India: COVID-19 India.                                    |
| India, Sikkim     | COVID-19 India. India COVID-19 Crowdsourced Patient Database: National Level Time Series, State-Wise Stats and Test Counts. India: COVID-19 India. |
| India, Sikkim     | COVID-19 India. India COVID-19 Crowdsourced Patient Database: State Level Daily Changes. India: COVID-19 India.                                    |
| India, Tamil Nadu | COVID-19 India. India COVID-19 Crowdsourced Patient Database: National Level Time Series, State-Wise Stats and Test Counts. India: COVID-19 India. |
| India, Tamil Nadu | COVID-19 India. India COVID-19 Crowdsourced Patient Database: State Level Daily Changes. India: COVID-19 India.                                    |
| India, Telangana  | COVID-19 India. India COVID-19 Crowdsourced Patient Database: National Level Time Series, State-Wise Stats and Test Counts. India: COVID-19 India. |
| India, Telangana  | COVID-19 India. India COVID-19 Crowdsourced Patient Database: State Level Daily Changes. India: COVID-19 India.                                    |
| India, Tripura    | COVID-19 India. India COVID-19 Crowdsourced Patient Database: National Level Time Series, State-Wise Stats and Test Counts. India: COVID-19 India. |

|                       |                                                                                                                                                                    |
|-----------------------|--------------------------------------------------------------------------------------------------------------------------------------------------------------------|
| India, Tripura        | COVID-19 India. India COVID-19 Crowdsourced Patient Database: State Level Daily Changes. India: COVID-19 India.                                                    |
| India, Uttar Pradesh  | COVID-19 India. India COVID-19 Crowdsourced Patient Database: National Level Time Series, State-Wise Stats and Test Counts. India: COVID-19 India.                 |
| India, Uttar Pradesh  | COVID-19 India. India COVID-19 Crowdsourced Patient Database: State Level Daily Changes. India: COVID-19 India.                                                    |
| India, Uttarakhand    | COVID-19 India. India COVID-19 Crowdsourced Patient Database: National Level Time Series, State-Wise Stats and Test Counts. India: COVID-19 India.                 |
| India, Uttarakhand    | COVID-19 India. India COVID-19 Crowdsourced Patient Database: State Level Daily Changes. India: COVID-19 India.                                                    |
| India, West Bengal    | COVID-19 India. India COVID-19 Crowdsourced Patient Database: National Level Time Series, State-Wise Stats and Test Counts. India: COVID-19 India.                 |
| India, West Bengal    | COVID-19 India. India COVID-19 Crowdsourced Patient Database: State Level Daily Changes. India: COVID-19 India.                                                    |
| Indonesia             | Johns Hopkins University. 2019 Novel Coronavirus COVID-19 (2019-nCoV) Data Repository by Johns Hopkins CSSE. Baltimore, Maryland: Johns Hopkins University.        |
| Iran                  | Johns Hopkins University. 2019 Novel Coronavirus COVID-19 (2019-nCoV) Data Repository by Johns Hopkins CSSE. Baltimore, Maryland: Johns Hopkins University.        |
| Iraq                  | Johns Hopkins University. 2019 Novel Coronavirus COVID-19 (2019-nCoV) Data Repository by Johns Hopkins CSSE. Baltimore, Maryland: Johns Hopkins University.        |
| Ireland               | Johns Hopkins University. 2019 Novel Coronavirus COVID-19 (2019-nCoV) Data Repository by Johns Hopkins CSSE. Baltimore, Maryland: Johns Hopkins University.        |
| Israel                | Johns Hopkins University. 2019 Novel Coronavirus COVID-19 (2019-nCoV) Data Repository by Johns Hopkins CSSE. Baltimore, Maryland: Johns Hopkins University.        |
| Italy, Abruzzo        | Department of Civil Protection (Italy). Italy COVID-19 Situation Monitoring - Department of Civil Protection. Rome, Italy: Department of Civil Protection (Italy). |
| Italy, Basilicata     | Department of Civil Protection (Italy). Italy COVID-19 Situation Monitoring - Department of Civil Protection. Rome, Italy: Department of Civil Protection (Italy). |
| Italy, Calabria       | Department of Civil Protection (Italy). Italy COVID-19 Situation Monitoring - Department of Civil Protection. Rome, Italy: Department of Civil Protection (Italy). |
| Italy, Campania       | Department of Civil Protection (Italy). Italy COVID-19 Situation Monitoring - Department of Civil Protection. Rome, Italy: Department of Civil Protection (Italy). |
| Italy, Emilia-Romagna | Department of Civil Protection (Italy). Italy COVID-19 Situation Monitoring - Department of Civil Protection. Rome, Italy: Department of Civil Protection (Italy). |



|                                  |                                                                                                                                                                    |
|----------------------------------|--------------------------------------------------------------------------------------------------------------------------------------------------------------------|
| Italy, Friuli-Venezia Giulia     | Department of Civil Protection (Italy). Italy COVID-19 Situation Monitoring - Department of Civil Protection. Rome, Italy: Department of Civil Protection (Italy). |
| Italy, Lazio                     | Department of Civil Protection (Italy). Italy COVID-19 Situation Monitoring - Department of Civil Protection. Rome, Italy: Department of Civil Protection (Italy). |
| Italy, Liguria                   | Department of Civil Protection (Italy). Italy COVID-19 Situation Monitoring - Department of Civil Protection. Rome, Italy: Department of Civil Protection (Italy). |
| Italy, Lombardia                 | Department of Civil Protection (Italy). Italy COVID-19 Situation Monitoring - Department of Civil Protection. Rome, Italy: Department of Civil Protection (Italy). |
| Italy, Marche                    | Department of Civil Protection (Italy). Italy COVID-19 Situation Monitoring - Department of Civil Protection. Rome, Italy: Department of Civil Protection (Italy). |
| Italy, Molise                    | Department of Civil Protection (Italy). Italy COVID-19 Situation Monitoring - Department of Civil Protection. Rome, Italy: Department of Civil Protection (Italy). |
| Italy, Piemonte                  | Department of Civil Protection (Italy). Italy COVID-19 Situation Monitoring - Department of Civil Protection. Rome, Italy: Department of Civil Protection (Italy). |
| Italy, Prov. autonoma di Bolzano | Department of Civil Protection (Italy). Italy COVID-19 Situation Monitoring - Department of Civil Protection. Rome, Italy: Department of Civil Protection (Italy). |
| Italy, Prov. autonoma di Trento  | Department of Civil Protection (Italy). Italy COVID-19 Situation Monitoring - Department of Civil Protection. Rome, Italy: Department of Civil Protection (Italy). |
| Italy, Puglia                    | Department of Civil Protection (Italy). Italy COVID-19 Situation Monitoring - Department of Civil Protection. Rome, Italy: Department of Civil Protection (Italy). |
| Italy, Sardegna                  | Department of Civil Protection (Italy). Italy COVID-19 Situation Monitoring - Department of Civil Protection. Rome, Italy: Department of Civil Protection (Italy). |
| Italy, Sicilia                   | Department of Civil Protection (Italy). Italy COVID-19 Situation Monitoring - Department of Civil Protection. Rome, Italy: Department of Civil Protection (Italy). |
| Italy, Toscana                   | Department of Civil Protection (Italy). Italy COVID-19 Situation Monitoring - Department of Civil Protection. Rome, Italy: Department of Civil Protection (Italy). |
| Italy, Umbria                    | Department of Civil Protection (Italy). Italy COVID-19 Situation Monitoring - Department of Civil Protection. Rome, Italy: Department of Civil Protection (Italy). |
| Italy, Valle d'Aosta             | Department of Civil Protection (Italy). Italy COVID-19 Situation Monitoring - Department of Civil Protection. Rome, Italy: Department of Civil Protection (Italy). |
| Italy, Veneto                    | Department of Civil Protection (Italy). Italy COVID-19 Situation Monitoring - Department of Civil Protection. Rome, Italy: Department of Civil Protection (Italy). |
| Jamaica                          | Johns Hopkins University. 2019 Novel Coronavirus COVID-19 (2019-nCoV) Data Repository by Johns Hopkins CSSE. Baltimore, Maryland: Johns Hopkins University.        |

|            |                                                                                                                                                             |
|------------|-------------------------------------------------------------------------------------------------------------------------------------------------------------|
| Japan      | Ministry of Health, Labour and Welfare (Japan). Japan Coronavirus Disease (COVID-19) Situation Report.                                                      |
| Jordan     | Johns Hopkins University. 2019 Novel Coronavirus COVID-19 (2019-nCoV) Data Repository by Johns Hopkins CSSE. Baltimore, Maryland: Johns Hopkins University. |
| Kazakhstan | *                                                                                                                                                           |
| Kenya      | Johns Hopkins University. 2019 Novel Coronavirus COVID-19 (2019-nCoV) Data Repository by Johns Hopkins CSSE. Baltimore, Maryland: Johns Hopkins University. |
| Kiribati   | Johns Hopkins University. 2019 Novel Coronavirus COVID-19 (2019-nCoV) Data Repository by Johns Hopkins CSSE. Baltimore, Maryland: Johns Hopkins University. |
| Kuwait     | Johns Hopkins University. 2019 Novel Coronavirus COVID-19 (2019-nCoV) Data Repository by Johns Hopkins CSSE. Baltimore, Maryland: Johns Hopkins University. |
| Kyrgyzstan | Johns Hopkins University. 2019 Novel Coronavirus COVID-19 (2019-nCoV) Data Repository by Johns Hopkins CSSE. Baltimore, Maryland: Johns Hopkins University. |
| Laos       | Johns Hopkins University. 2019 Novel Coronavirus COVID-19 (2019-nCoV) Data Repository by Johns Hopkins CSSE. Baltimore, Maryland: Johns Hopkins University. |
| Latvia     | Johns Hopkins University. 2019 Novel Coronavirus COVID-19 (2019-nCoV) Data Repository by Johns Hopkins CSSE. Baltimore, Maryland: Johns Hopkins University. |
| Lebanon    | Johns Hopkins University. 2019 Novel Coronavirus COVID-19 (2019-nCoV) Data Repository by Johns Hopkins CSSE. Baltimore, Maryland: Johns Hopkins University. |
| Lesotho    | Johns Hopkins University. 2019 Novel Coronavirus COVID-19 (2019-nCoV) Data Repository by Johns Hopkins CSSE. Baltimore, Maryland: Johns Hopkins University. |
| Liberia    | Johns Hopkins University. 2019 Novel Coronavirus COVID-19 (2019-nCoV) Data Repository by Johns Hopkins CSSE. Baltimore, Maryland: Johns Hopkins University. |
| Libya      | Johns Hopkins University. 2019 Novel Coronavirus COVID-19 (2019-nCoV) Data Repository by Johns Hopkins CSSE. Baltimore, Maryland: Johns Hopkins University. |
| Lithuania  | Johns Hopkins University. 2019 Novel Coronavirus COVID-19 (2019-nCoV) Data Repository by Johns Hopkins CSSE. Baltimore, Maryland: Johns Hopkins University. |
| Luxembourg | Johns Hopkins University. 2019 Novel Coronavirus COVID-19 (2019-nCoV) Data Repository by Johns Hopkins CSSE. Baltimore, Maryland: Johns Hopkins University. |
| Madagascar | Johns Hopkins University. 2019 Novel Coronavirus COVID-19 (2019-nCoV) Data Repository by Johns Hopkins CSSE. Baltimore, Maryland: Johns Hopkins University. |
| Malawi     | Johns Hopkins University. 2019 Novel Coronavirus COVID-19 (2019-nCoV) Data Repository by Johns Hopkins CSSE. Baltimore, Maryland: Johns Hopkins University. |
| Malaysia   | Johns Hopkins University. 2019 Novel Coronavirus COVID-19 (2019-nCoV) Data Repository by Johns Hopkins CSSE. Baltimore, Maryland: Johns Hopkins University. |

|                             |                                                                                                                                                                    |
|-----------------------------|--------------------------------------------------------------------------------------------------------------------------------------------------------------------|
| Maldives                    | Johns Hopkins University. 2019 Novel Coronavirus COVID-19 (2019-nCoV) Data Repository by Johns Hopkins CSSE. Baltimore, Maryland: Johns Hopkins University.        |
| Mali                        | Johns Hopkins University. 2019 Novel Coronavirus COVID-19 (2019-nCoV) Data Repository by Johns Hopkins CSSE. Baltimore, Maryland: Johns Hopkins University.        |
| Malta                       | Johns Hopkins University. 2019 Novel Coronavirus COVID-19 (2019-nCoV) Data Repository by Johns Hopkins CSSE. Baltimore, Maryland: Johns Hopkins University.        |
| Marshall Islands            | Johns Hopkins University. 2019 Novel Coronavirus COVID-19 (2019-nCoV) Data Repository by Johns Hopkins CSSE. Baltimore, Maryland: Johns Hopkins University.        |
| Mauritania                  | Johns Hopkins University. 2019 Novel Coronavirus COVID-19 (2019-nCoV) Data Repository by Johns Hopkins CSSE. Baltimore, Maryland: Johns Hopkins University.        |
| Mauritius                   | Johns Hopkins University. 2019 Novel Coronavirus COVID-19 (2019-nCoV) Data Repository by Johns Hopkins CSSE. Baltimore, Maryland: Johns Hopkins University.        |
| Mexico, Aguascalientes      | Directorate General of Epidemiology, Secretariat of Health (Mexico), National Institute of Statistics and Geography (INEGI) (Mexico). Mexico COVID-19 Deaths 2020. |
| Mexico, Baja California     | Directorate General of Epidemiology, Secretariat of Health (Mexico), National Institute of Statistics and Geography (INEGI) (Mexico). Mexico COVID-19 Deaths 2020. |
| Mexico, Baja California Sur | Directorate General of Epidemiology, Secretariat of Health (Mexico), National Institute of Statistics and Geography (INEGI) (Mexico). Mexico COVID-19 Deaths 2020. |
| Mexico, Campeche            | Directorate General of Epidemiology, Secretariat of Health (Mexico), National Institute of Statistics and Geography (INEGI) (Mexico). Mexico COVID-19 Deaths 2020. |
| Mexico, Chiapas             | Directorate General of Epidemiology, Secretariat of Health (Mexico), National Institute of Statistics and Geography (INEGI) (Mexico). Mexico COVID-19 Deaths 2020. |
| Mexico, Chihuahua           | Directorate General of Epidemiology, Secretariat of Health (Mexico), National Institute of Statistics and Geography (INEGI) (Mexico). Mexico COVID-19 Deaths 2020. |
| Mexico, Coahuila            | Directorate General of Epidemiology, Secretariat of Health (Mexico), National Institute of Statistics and Geography (INEGI) (Mexico). Mexico COVID-19 Deaths 2020. |
| Mexico, Colima              | Directorate General of Epidemiology, Secretariat of Health (Mexico), National Institute of Statistics and Geography (INEGI) (Mexico). Mexico COVID-19 Deaths 2020. |
| Mexico, Durango             | Directorate General of Epidemiology, Secretariat of Health (Mexico), National Institute of Statistics and Geography (INEGI) (Mexico). Mexico COVID-19 Deaths 2020. |
| Mexico, Guanajuato          | Directorate General of Epidemiology, Secretariat of Health (Mexico), National Institute of Statistics and Geography (INEGI) (Mexico). Mexico COVID-19 Deaths 2020. |
| Mexico, Guerrero            | Directorate General of Epidemiology, Secretariat of Health (Mexico), National Institute of Statistics and Geography (INEGI) (Mexico). Mexico COVID-19 Deaths 2020. |
| Mexico, Hidalgo             | Directorate General of Epidemiology, Secretariat of Health (Mexico), National Institute of Statistics and Geography (INEGI) (Mexico). Mexico COVID-19 Deaths 2020. |
| Mexico, Jalisco             | Directorate General of Epidemiology, Secretariat of Health (Mexico), National Institute of Statistics and Geography (INEGI) (Mexico). Mexico COVID-19 Deaths 2020. |
| Mexico, México              | Directorate General of Epidemiology, Secretariat of Health (Mexico), National Institute of Statistics and Geography (INEGI) (Mexico). Mexico COVID-19 Deaths 2020. |
| Mexico, Mexico City         | Directorate General of Epidemiology, Secretariat of Health (Mexico), National Institute of Statistics and Geography (INEGI) (Mexico). Mexico COVID-19 Deaths 2020. |
| Mexico, Michoacán de Ocampo | Directorate General of Epidemiology, Secretariat of Health (Mexico), National Institute of Statistics and Geography (INEGI) (Mexico). Mexico COVID-19 Deaths 2020. |
| Mexico, Morelos             | Directorate General of Epidemiology, Secretariat of Health (Mexico), National Institute of Statistics and Geography (INEGI) (Mexico). Mexico COVID-19 Deaths 2020. |
| Mexico, Nayarit             | Directorate General of Epidemiology, Secretariat of Health (Mexico), National Institute of Statistics and Geography (INEGI) (Mexico). Mexico COVID-19 Deaths 2020. |
| Mexico, Nuevo León          | Directorate General of Epidemiology, Secretariat of Health (Mexico), National Institute of Statistics and Geography (INEGI) (Mexico). Mexico COVID-19 Deaths 2020. |
| Mexico, Oaxaca              | Directorate General of Epidemiology, Secretariat of Health (Mexico), National Institute of Statistics and Geography (INEGI) (Mexico). Mexico COVID-19 Deaths 2020. |
| Mexico, Puebla              | Directorate General of Epidemiology, Secretariat of Health (Mexico), National Institute of Statistics and Geography (INEGI) (Mexico). Mexico COVID-19 Deaths 2020. |
| Mexico, Querétaro           | Directorate General of Epidemiology, Secretariat of Health (Mexico), National Institute of Statistics and Geography (INEGI) (Mexico). Mexico COVID-19 Deaths 2020. |

|                                         |                                                                                                                                                                    |
|-----------------------------------------|--------------------------------------------------------------------------------------------------------------------------------------------------------------------|
| Mexico, Quintana Roo                    | Directorate General of Epidemiology, Secretariat of Health (Mexico), National Institute of Statistics and Geography (INEGI) (Mexico). Mexico COVID-19 Deaths 2020. |
| Mexico, San Luis Potosí                 | Directorate General of Epidemiology, Secretariat of Health (Mexico), National Institute of Statistics and Geography (INEGI) (Mexico). Mexico COVID-19 Deaths 2020. |
| Mexico, Sinaloa                         | Directorate General of Epidemiology, Secretariat of Health (Mexico), National Institute of Statistics and Geography (INEGI) (Mexico). Mexico COVID-19 Deaths 2020. |
| Mexico, Sonora                          | Directorate General of Epidemiology, Secretariat of Health (Mexico), National Institute of Statistics and Geography (INEGI) (Mexico). Mexico COVID-19 Deaths 2020. |
| Mexico, Tabasco                         | Directorate General of Epidemiology, Secretariat of Health (Mexico), National Institute of Statistics and Geography (INEGI) (Mexico). Mexico COVID-19 Deaths 2020. |
| Mexico, Tamaulipas                      | Directorate General of Epidemiology, Secretariat of Health (Mexico), National Institute of Statistics and Geography (INEGI) (Mexico). Mexico COVID-19 Deaths 2020. |
| Mexico, Tlaxcala                        | Directorate General of Epidemiology, Secretariat of Health (Mexico), National Institute of Statistics and Geography (INEGI) (Mexico). Mexico COVID-19 Deaths 2020. |
| Mexico, Veracruz de Ignacio de la Llave | Directorate General of Epidemiology, Secretariat of Health (Mexico), National Institute of Statistics and Geography (INEGI) (Mexico). Mexico COVID-19 Deaths 2020. |
| Mexico, Yucatán                         | Directorate General of Epidemiology, Secretariat of Health (Mexico), National Institute of Statistics and Geography (INEGI) (Mexico). Mexico COVID-19 Deaths 2020. |
| Mexico, Zacatecas                       | Directorate General of Epidemiology, Secretariat of Health (Mexico), National Institute of Statistics and Geography (INEGI) (Mexico). Mexico COVID-19 Deaths 2020. |
| Moldova                                 | Johns Hopkins University. 2019 Novel Coronavirus COVID-19 (2019-nCoV) Data Repository by Johns Hopkins CSSE. Baltimore, Maryland: Johns Hopkins University.        |
| Monaco                                  | Johns Hopkins University. 2019 Novel Coronavirus COVID-19 (2019-nCoV) Data Repository by Johns Hopkins CSSE. Baltimore, Maryland: Johns Hopkins University.        |
| Mongolia                                | Johns Hopkins University. 2019 Novel Coronavirus COVID-19 (2019-nCoV) Data Repository by Johns Hopkins CSSE. Baltimore, Maryland: Johns Hopkins University.        |
| Montenegro                              | Johns Hopkins University. 2019 Novel Coronavirus COVID-19 (2019-nCoV) Data Repository by Johns Hopkins CSSE. Baltimore, Maryland: Johns Hopkins University.        |
| Morocco                                 | Johns Hopkins University. 2019 Novel Coronavirus COVID-19 (2019-nCoV) Data Repository by Johns Hopkins CSSE. Baltimore, Maryland: Johns Hopkins University.        |
| Mozambique                              | Johns Hopkins University. 2019 Novel Coronavirus COVID-19 (2019-nCoV) Data Repository by Johns Hopkins CSSE. Baltimore, Maryland: Johns Hopkins University.        |
| Myanmar                                 | Johns Hopkins University. 2019 Novel Coronavirus COVID-19 (2019-nCoV) Data Repository by Johns Hopkins CSSE. Baltimore, Maryland: Johns Hopkins University.        |
| Namibia                                 | Johns Hopkins University. 2019 Novel Coronavirus COVID-19 (2019-nCoV) Data Repository by Johns Hopkins CSSE. Baltimore, Maryland: Johns Hopkins University.        |
| Nepal                                   | Johns Hopkins University. 2019 Novel Coronavirus COVID-19 (2019-nCoV) Data Repository by Johns Hopkins CSSE. Baltimore, Maryland: Johns Hopkins University.        |
| Netherlands                             | Johns Hopkins University. 2019 Novel Coronavirus COVID-19 (2019-nCoV) Data Repository by Johns Hopkins CSSE. Baltimore, Maryland: Johns Hopkins University.        |
| New Zealand                             | Johns Hopkins University. 2019 Novel Coronavirus COVID-19 (2019-nCoV) Data Repository by Johns Hopkins CSSE. Baltimore, Maryland: Johns Hopkins University.        |
| Nicaragua                               | Johns Hopkins University. 2019 Novel Coronavirus COVID-19 (2019-nCoV) Data Repository by Johns Hopkins CSSE. Baltimore, Maryland: Johns Hopkins University.        |

|                                       |                                                                                                                                                                                  |
|---------------------------------------|----------------------------------------------------------------------------------------------------------------------------------------------------------------------------------|
| Niger                                 | Johns Hopkins University. 2019 Novel Coronavirus COVID-19 (2019-nCoV) Data Repository by Johns Hopkins CSSE. Baltimore, Maryland: Johns Hopkins University.                      |
| Nigeria                               | Johns Hopkins University. 2019 Novel Coronavirus COVID-19 (2019-nCoV) Data Repository by Johns Hopkins CSSE. Baltimore, Maryland: Johns Hopkins University.                      |
| North Macedonia                       | Johns Hopkins University. 2019 Novel Coronavirus COVID-19 (2019-nCoV) Data Repository by Johns Hopkins CSSE. Baltimore, Maryland: Johns Hopkins University.                      |
| Northern Mariana Islands              | Johns Hopkins University. 2019 Novel Coronavirus COVID-19 (2019-nCoV) Data Repository by Johns Hopkins CSSE. Baltimore, Maryland: Johns Hopkins University.                      |
| Norway                                | Johns Hopkins University. 2019 Novel Coronavirus COVID-19 (2019-nCoV) Data Repository by Johns Hopkins CSSE. Baltimore, Maryland: Johns Hopkins University.                      |
| Oman                                  | Johns Hopkins University. 2019 Novel Coronavirus COVID-19 (2019-nCoV) Data Repository by Johns Hopkins CSSE. Baltimore, Maryland: Johns Hopkins University.                      |
| Pakistan, Azad Jammu & Kashmir        | Ministry of National Health Services, Regulations & Coordination (Pakistan). Pakistan - Azad Jammu and Kashmir COVID-19 Statistics. Islamabad, Pakistan: Government of Pakistan. |
| Pakistan, Azad Jammu & Kashmir        | Ministry of National Health Services, Regulations & Coordination (Pakistan). Pakistan COVID-19 Dashboard.                                                                        |
| Pakistan, Balochistan                 | Ministry of National Health Services, Regulations & Coordination (Pakistan). Pakistan - Balochistan COVID-19 Statistics. Islamabad, Pakistan: Government of Pakistan.            |
| Pakistan, Balochistan                 | Ministry of National Health Services, Regulations & Coordination (Pakistan). Pakistan COVID-19 Dashboard.                                                                        |
| Pakistan, Gilgit-Baltistan            | Ministry of National Health Services, Regulations & Coordination (Pakistan). Pakistan - Gilgit-Baltistan COVID-19 Statistics. Islamabad, Pakistan: Government of Pakistan.       |
| Pakistan, Gilgit-Baltistan            | Ministry of National Health Services, Regulations & Coordination (Pakistan). Pakistan COVID-19 Dashboard.                                                                        |
| Pakistan, Islamabad Capital Territory | Ministry of National Health Services, Regulations & Coordination (Pakistan). Pakistan - Islāmābād COVID-19 Statistics. Islāmābād, Pakistan: Government of Pakistan.              |
| Pakistan, Islamabad Capital Territory | Ministry of National Health Services, Regulations & Coordination (Pakistan). Pakistan COVID-19 Dashboard.                                                                        |
| Pakistan, Khyber Pakhtunkhwa          | Ministry of National Health Services, Regulations & Coordination (Pakistan). Pakistan - Khyber Pakhtunkhwa COVID-19 Statistics 2020.                                             |
| Pakistan, Khyber Pakhtunkhwa          | Ministry of National Health Services, Regulations & Coordination (Pakistan). Pakistan COVID-19 Dashboard.                                                                        |
| Pakistan, Punjab                      | Ministry of National Health Services, Regulations & Coordination (Pakistan). Pakistan - Punjab COVID-19 Statistics. Islamabad, Pakistan: Government of Pakistan.                 |

|                  |                                                                                                                                                                                                                                                                      |
|------------------|----------------------------------------------------------------------------------------------------------------------------------------------------------------------------------------------------------------------------------------------------------------------|
| Pakistan, Punjab | Ministry of National Health Services, Regulations & Coordination (Pakistan). Pakistan COVID-19 Dashboard.                                                                                                                                                            |
| Pakistan, Sindh  | Wikipedia. COVID-19 pandemic in Pakistan. San Francisco, United States of America: Wikipedia. Retrieved on April 29, 2021 from <a href="https://en.wikipedia.org/wiki/COVID-19_pandemic_in_Pakistan">https://en.wikipedia.org/wiki/COVID-19_pandemic_in_Pakistan</a> |
| Pakistan, Sindh  | Ministry of National Health Services, Regulations & Coordination (Pakistan). Pakistan - Sindh COVID-19 Statistics. Islamabad, Pakistan: Government of Pakistan.                                                                                                      |
| Pakistan, Sindh  | Ministry of National Health Services, Regulations & Coordination (Pakistan). Pakistan COVID-19 Dashboard.                                                                                                                                                            |
| Palau            | Johns Hopkins University. 2019 Novel Coronavirus COVID-19 (2019-nCoV) Data Repository by Johns Hopkins CSSE. Baltimore, Maryland: Johns Hopkins University.                                                                                                          |
| Palestine        | Johns Hopkins University. 2019 Novel Coronavirus COVID-19 (2019-nCoV) Data Repository by Johns Hopkins CSSE. Baltimore, Maryland: Johns Hopkins University.                                                                                                          |
| Panama           | Johns Hopkins University. 2019 Novel Coronavirus COVID-19 (2019-nCoV) Data Repository by Johns Hopkins CSSE. Baltimore, Maryland: Johns Hopkins University.                                                                                                          |
| Papua New Guinea | Johns Hopkins University. 2019 Novel Coronavirus COVID-19 (2019-nCoV) Data Repository by Johns Hopkins CSSE. Baltimore, Maryland: Johns Hopkins University.                                                                                                          |
| Paraguay         | Johns Hopkins University. 2019 Novel Coronavirus COVID-19 (2019-nCoV) Data Repository by Johns Hopkins CSSE. Baltimore, Maryland: Johns Hopkins University.                                                                                                          |
| Peru             | Ministry of Health (Peru), National Center for Epidemiology, Prevention and Disease Control (Peru). Peru Deaths by COVID-19.                                                                                                                                         |
| Philippines      | Department of Health (Philippines). Philippines Department of Health COVID-19 Tracker. Manila, Philippines: Department of Health (Philippines).                                                                                                                      |
| Poland           | Johns Hopkins University. 2019 Novel Coronavirus COVID-19 (2019-nCoV) Data Repository by Johns Hopkins CSSE. Baltimore, Maryland: Johns Hopkins University.                                                                                                          |
| Portugal         | Johns Hopkins University. 2019 Novel Coronavirus COVID-19 (2019-nCoV) Data Repository by Johns Hopkins CSSE. Baltimore, Maryland: Johns Hopkins University.                                                                                                          |
| Puerto Rico      | Johns Hopkins University. 2019 Novel Coronavirus COVID-19 (2019-nCoV) Data Repository by Johns Hopkins CSSE. Baltimore, Maryland: Johns Hopkins University.                                                                                                          |
| Qatar            | Johns Hopkins University. 2019 Novel Coronavirus COVID-19 (2019-nCoV) Data Repository by Johns Hopkins CSSE. Baltimore, Maryland: Johns Hopkins University.                                                                                                          |
| Romania          | Johns Hopkins University. 2019 Novel Coronavirus COVID-19 (2019-nCoV) Data Repository by Johns Hopkins CSSE. Baltimore, Maryland: Johns Hopkins University.                                                                                                          |
| Russia           | Federal State Statistics Service (Russia). Russia Natural Movement of the Population 2021. Moscow, Russian Federation: Federal State Statistics Service (Russia).                                                                                                    |

|                                  |                                                                                                                                                             |
|----------------------------------|-------------------------------------------------------------------------------------------------------------------------------------------------------------|
| Rwanda                           | Johns Hopkins University. 2019 Novel Coronavirus COVID-19 (2019-nCoV) Data Repository by Johns Hopkins CSSE. Baltimore, Maryland: Johns Hopkins University. |
| Saint Kitts and Nevis            | Johns Hopkins University. 2019 Novel Coronavirus COVID-19 (2019-nCoV) Data Repository by Johns Hopkins CSSE. Baltimore, Maryland: Johns Hopkins University. |
| Saint Lucia                      | Johns Hopkins University. 2019 Novel Coronavirus COVID-19 (2019-nCoV) Data Repository by Johns Hopkins CSSE. Baltimore, Maryland: Johns Hopkins University. |
| Saint Vincent and the Grenadines | Johns Hopkins University. 2019 Novel Coronavirus COVID-19 (2019-nCoV) Data Repository by Johns Hopkins CSSE. Baltimore, Maryland: Johns Hopkins University. |
| Samoa                            | Johns Hopkins University. 2019 Novel Coronavirus COVID-19 (2019-nCoV) Data Repository by Johns Hopkins CSSE. Baltimore, Maryland: Johns Hopkins University. |
| San Marino                       | Johns Hopkins University. 2019 Novel Coronavirus COVID-19 (2019-nCoV) Data Repository by Johns Hopkins CSSE. Baltimore, Maryland: Johns Hopkins University. |
| São Tomé and Príncipe            | Johns Hopkins University. 2019 Novel Coronavirus COVID-19 (2019-nCoV) Data Repository by Johns Hopkins CSSE. Baltimore, Maryland: Johns Hopkins University. |
| Saudi Arabia                     | Johns Hopkins University. 2019 Novel Coronavirus COVID-19 (2019-nCoV) Data Repository by Johns Hopkins CSSE. Baltimore, Maryland: Johns Hopkins University. |
| Senegal                          | Johns Hopkins University. 2019 Novel Coronavirus COVID-19 (2019-nCoV) Data Repository by Johns Hopkins CSSE. Baltimore, Maryland: Johns Hopkins University. |
| Serbia                           | Johns Hopkins University. 2019 Novel Coronavirus COVID-19 (2019-nCoV) Data Repository by Johns Hopkins CSSE. Baltimore, Maryland: Johns Hopkins University. |
| Seychelles                       | Johns Hopkins University. 2019 Novel Coronavirus COVID-19 (2019-nCoV) Data Repository by Johns Hopkins CSSE. Baltimore, Maryland: Johns Hopkins University. |
| Sierra Leone                     | Johns Hopkins University. 2019 Novel Coronavirus COVID-19 (2019-nCoV) Data Repository by Johns Hopkins CSSE. Baltimore, Maryland: Johns Hopkins University. |
| Singapore                        | Johns Hopkins University. 2019 Novel Coronavirus COVID-19 (2019-nCoV) Data Repository by Johns Hopkins CSSE. Baltimore, Maryland: Johns Hopkins University. |
| Slovakia                         | Johns Hopkins University. 2019 Novel Coronavirus COVID-19 (2019-nCoV) Data Repository by Johns Hopkins CSSE. Baltimore, Maryland: Johns Hopkins University. |
| Slovenia                         | Johns Hopkins University. 2019 Novel Coronavirus COVID-19 (2019-nCoV) Data Repository by Johns Hopkins CSSE. Baltimore, Maryland: Johns Hopkins University. |
| Solomon Islands                  | Johns Hopkins University. 2019 Novel Coronavirus COVID-19 (2019-nCoV) Data Repository by Johns Hopkins CSSE. Baltimore, Maryland: Johns Hopkins University. |
| Somalia                          | Johns Hopkins University. 2019 Novel Coronavirus COVID-19 (2019-nCoV) Data Repository by Johns Hopkins CSSE. Baltimore, Maryland: Johns Hopkins University. |

|                           |                                                                                                                                                                                                                     |
|---------------------------|---------------------------------------------------------------------------------------------------------------------------------------------------------------------------------------------------------------------|
| South Africa              | Johns Hopkins University. 2019 Novel Coronavirus COVID-19 (2019-nCoV) Data Repository by Johns Hopkins CSSE. Baltimore, Maryland: Johns Hopkins University.                                                         |
| South Korea               | Johns Hopkins University. 2019 Novel Coronavirus COVID-19 (2019-nCoV) Data Repository by Johns Hopkins CSSE. Baltimore, Maryland: Johns Hopkins University.                                                         |
| South Sudan               | Johns Hopkins University. 2019 Novel Coronavirus COVID-19 (2019-nCoV) Data Repository by Johns Hopkins CSSE. Baltimore, Maryland: Johns Hopkins University.                                                         |
| Spain, Andalusia          | Andalusia Ministry of Health and Families (Spain). Spain - Andalusia Ministry of Health and Families Coronavirus Report.                                                                                            |
| Spain, Aragon             | Ministry of Health, Consumption and Social Welfare (Spain). Spain Ministry of Health, Consumption, and Social Welfare COVID-19 Situation Update. Spain: Ministry of Health, Consumption and Social Welfare (Spain). |
| Spain, Aragon             | Institute of Health Carlos III (Spain), Ministry of Health, Consumption and Social Welfare (Spain). Spain Carlos III Health Institute Situation of COVID-19. Madrid, Spain: Institute of Health Carlos III (Spain). |
| Spain, Asturias           | Ministry of Health, Consumption and Social Welfare (Spain). Spain Ministry of Health, Consumption, and Social Welfare COVID-19 Situation Update. Spain: Ministry of Health, Consumption and Social Welfare (Spain). |
| Spain, Asturias           | Institute of Health Carlos III (Spain), Ministry of Health, Consumption and Social Welfare (Spain). Spain Carlos III Health Institute Situation of COVID-19. Madrid, Spain: Institute of Health Carlos III (Spain). |
| Spain, Balearic Islands   | Government of the Balearic Islands. Spain - Balearic Islands Ministry of Health and Consumption News About the Coronavirus COVID-19.                                                                                |
| Spain, Basque Country     | Basque Government Department of Health. Spain - Basque Country Information on the Evolution of the Coronavirus Epidemiological Bulletin.                                                                            |
| Spain, Canary Islands     | Government of the Canary Islands (Spain). Spain - Canary Islands Government COVID-19 Dashboard.                                                                                                                     |
| Spain, Cantabria          | Cantabrian Health Service (Spain), Government of Cantabria (Spain). Spain - Cantabria Epidemiological Situation of COVID-19. Spain: Cantabrian Health Service (Spain).                                              |
| Spain, Castile and León   | Castile and León Board, Health Commission (Spain). Spain - Castile and León Open Data: Coronavirus (COVID-19) Epidemiological Situation.                                                                            |
| Spain, Castile and León   | Castile and León Board, Health Commission (Spain). Spain - Castile and León Open Data: Situation of Hospitalized by Coronavirus.                                                                                    |
| Spain, Castilla–La Mancha | Ministry of Health, Consumption and Social Welfare (Spain). Spain Ministry of Health, Consumption, and Social Welfare COVID-19 Situation Update. Spain: Ministry of Health, Consumption and Social Welfare (Spain). |
| Spain, Castilla–La Mancha | Institute of Health Carlos III (Spain), Ministry of Health, Consumption and Social Welfare (Spain). Spain Carlos III Health Institute Situation of COVID-19. Madrid, Spain: Institute of Health Carlos III (Spain). |



|                            |                                                                                                                                                                                                                     |
|----------------------------|---------------------------------------------------------------------------------------------------------------------------------------------------------------------------------------------------------------------|
| Spain, Catalonia           | Statistical Institute of Catalonia (IDESCAT) (Spain). Spain - Catalonia COVID-19 Weekly Confirmed Cases and Deaths. Barcelona, Spain: Statistical Institute of Catalonia (IDESCAT) (Spain).                         |
| Spain, Catalonia           | Statistical Institute of Catalonia (IDESCAT) (Spain). Spain - Catalonia COVID-19 Daily Confirmed Cases and Deaths 2020. Barcelona, Spain: Statistical Institute of Catalonia (IDESCAT) (Spain), 2020.               |
| Spain, Ceuta               | Ministry of Health, Consumption and Social Welfare (Spain). Spain Ministry of Health, Consumption, and Social Welfare COVID-19 Situation Update. Spain: Ministry of Health, Consumption and Social Welfare (Spain). |
| Spain, Ceuta               | Institute of Health Carlos III (Spain), Ministry of Health, Consumption and Social Welfare (Spain). Spain Carlos III Health Institute Situation of COVID-19. Madrid, Spain: Institute of Health Carlos III (Spain). |
| Spain, Community of Madrid | Ministry of Health, Consumption and Social Welfare (Spain). Spain Ministry of Health, Consumption, and Social Welfare COVID-19 Situation Update. Spain: Ministry of Health, Consumption and Social Welfare (Spain). |
| Spain, Community of Madrid | City of Madrid (Spain), Madrid Health Service (Spain). Spain - Madrid Health Service COVID-19 Current Situation Daily Status Report. Madrid, Spain: City of Madrid (Spain).                                         |
| Spain, Extremadura         | Ministry of Health, Consumption and Social Welfare (Spain). Spain Ministry of Health, Consumption, and Social Welfare COVID-19 Situation Update. Spain: Ministry of Health, Consumption and Social Welfare (Spain). |
| Spain, Galicia             | Galician Healthcare Service (Spain), Regional Government of Galicia (Spain). Spain - Galicia Regional Government COVID-19 Press Releases 2020. Spain: Regional Government of Galicia (Spain).                       |
| Spain, La Rioja            | Government of La Rioja (Spain). Spain - La Rioja Covid-19 Tests Performed per Days. Brazil: Government of La Rioja (Spain).                                                                                         |
| Spain, Melilla             | Ministry of Health, Consumption and Social Welfare (Spain). Spain Ministry of Health, Consumption, and Social Welfare COVID-19 Situation Update. Spain: Ministry of Health, Consumption and Social Welfare (Spain). |
| Spain, Melilla             | Institute of Health Carlos III (Spain), Ministry of Health, Consumption and Social Welfare (Spain). Spain Carlos III Health Institute Situation of COVID-19. Madrid, Spain: Institute of Health Carlos III (Spain). |
| Spain, Murcia              | Institute of Health Carlos III (Spain), Ministry of Health, Consumption and Social Welfare (Spain). Spain Carlos III Health Institute Situation of COVID-19. Madrid, Spain: Institute of Health Carlos III (Spain). |
| Spain, Murcia              | Ministry of Health of the Region of Murcia (Spain). COVID-19 Region of Murcia - Spain. Spain: Ministry of Health of the Region of Murcia (Spain).                                                                   |
| Spain, Navarre             | Government of Navarra (Spain). Spain - Navarra COVID-19 Testing, Deaths, Hospitalization Data May-June 2020. Spain: Government of Navarra (Spain), 2020.                                                            |
| Spain, Valencian Community | Valencia Ministry of Universal Health and Public Health (Spain). Spain - Valencia COVID-19: Monitoring of the Situation. Spain: Valencia Ministry of Universal Health and Public Health (Spain).                    |
| Sri Lanka                  | Johns Hopkins University. 2019 Novel Coronavirus COVID-19 (2019-nCoV) Data Repository by Johns Hopkins CSSE. Baltimore, Maryland: Johns Hopkins University.                                                         |

|                            |                                                                                                                                                                                                  |
|----------------------------|--------------------------------------------------------------------------------------------------------------------------------------------------------------------------------------------------|
| Sudan                      | Johns Hopkins University. 2019 Novel Coronavirus COVID-19 (2019-nCoV) Data Repository by Johns Hopkins CSSE. Baltimore, Maryland: Johns Hopkins University.                                      |
| Suriname                   | Johns Hopkins University. 2019 Novel Coronavirus COVID-19 (2019-nCoV) Data Repository by Johns Hopkins CSSE. Baltimore, Maryland: Johns Hopkins University.                                      |
| Sweden                     | Public Health Agency of Sweden. Sweden Public Health Agency COVID-19 Confirmed Cases Daily Update. Östersund, Sweden: Public Health Agency of Sweden.                                            |
| Switzerland                | Federal Office of Public Health (Switzerland). Switzerland Federal Office of Public Health New Coronavirus Current Situation. Berne, Switzerland: Federal Office of Public Health (Switzerland). |
| Syria                      | Johns Hopkins University. 2019 Novel Coronavirus COVID-19 (2019-nCoV) Data Repository by Johns Hopkins CSSE. Baltimore, Maryland: Johns Hopkins University.                                      |
| Taiwan (Province of China) | Johns Hopkins University. 2019 Novel Coronavirus COVID-19 (2019-nCoV) Data Repository by Johns Hopkins CSSE. Baltimore, Maryland: Johns Hopkins University.                                      |
| Tajikistan                 | Johns Hopkins University. 2019 Novel Coronavirus COVID-19 (2019-nCoV) Data Repository by Johns Hopkins CSSE. Baltimore, Maryland: Johns Hopkins University.                                      |
| Tanzania                   | Johns Hopkins University. 2019 Novel Coronavirus COVID-19 (2019-nCoV) Data Repository by Johns Hopkins CSSE. Baltimore, Maryland: Johns Hopkins University.                                      |
| Thailand                   | Johns Hopkins University. 2019 Novel Coronavirus COVID-19 (2019-nCoV) Data Repository by Johns Hopkins CSSE. Baltimore, Maryland: Johns Hopkins University.                                      |
| The Bahamas                | Johns Hopkins University. 2019 Novel Coronavirus COVID-19 (2019-nCoV) Data Repository by Johns Hopkins CSSE. Baltimore, Maryland: Johns Hopkins University.                                      |
| The Gambia                 | Johns Hopkins University. 2019 Novel Coronavirus COVID-19 (2019-nCoV) Data Repository by Johns Hopkins CSSE. Baltimore, Maryland: Johns Hopkins University.                                      |
| Timor-Leste                | Johns Hopkins University. 2019 Novel Coronavirus COVID-19 (2019-nCoV) Data Repository by Johns Hopkins CSSE. Baltimore, Maryland: Johns Hopkins University.                                      |
| Togo                       | Johns Hopkins University. 2019 Novel Coronavirus COVID-19 (2019-nCoV) Data Repository by Johns Hopkins CSSE. Baltimore, Maryland: Johns Hopkins University.                                      |
| Trinidad and Tobago        | Johns Hopkins University. 2019 Novel Coronavirus COVID-19 (2019-nCoV) Data Repository by Johns Hopkins CSSE. Baltimore, Maryland: Johns Hopkins University.                                      |
| Tunisia                    | Johns Hopkins University. 2019 Novel Coronavirus COVID-19 (2019-nCoV) Data Repository by Johns Hopkins CSSE. Baltimore, Maryland: Johns Hopkins University.                                      |
| Turkey                     | Johns Hopkins University. 2019 Novel Coronavirus COVID-19 (2019-nCoV) Data Repository by Johns Hopkins CSSE. Baltimore, Maryland: Johns Hopkins University.                                      |
| Uganda                     | Johns Hopkins University. 2019 Novel Coronavirus COVID-19 (2019-nCoV) Data Repository by Johns Hopkins CSSE. Baltimore, Maryland: Johns Hopkins University.                                      |

|                      |                                                                                                                                                                                                                                     |
|----------------------|-------------------------------------------------------------------------------------------------------------------------------------------------------------------------------------------------------------------------------------|
| UK, England          | Office for National Statistics (ONS) (United Kingdom). United Kingdom - England and Wales Deaths Registered Weekly, Provisional.                                                                                                    |
| UK, Northern Ireland | Office for National Statistics (ONS) (United Kingdom). United Kingdom - England and Wales Deaths Registered Weekly, Provisional.                                                                                                    |
| UK, Scotland         | Office for National Statistics (ONS) (United Kingdom). United Kingdom - England and Wales Deaths Registered Weekly, Provisional.                                                                                                    |
| UK, Wales            | Office for National Statistics (ONS) (United Kingdom). United Kingdom - England and Wales Deaths Registered Weekly, Provisional.                                                                                                    |
| Ukraine              | Johns Hopkins University. 2019 Novel Coronavirus COVID-19 (2019-nCoV) Data Repository by Johns Hopkins CSSE. Baltimore, Maryland: Johns Hopkins University.                                                                         |
| United Arab Emirates | Johns Hopkins University. 2019 Novel Coronavirus COVID-19 (2019-nCoV) Data Repository by Johns Hopkins CSSE. Baltimore, Maryland: Johns Hopkins University.                                                                         |
| Uruguay              | Johns Hopkins University. 2019 Novel Coronavirus COVID-19 (2019-nCoV) Data Repository by Johns Hopkins CSSE. Baltimore, Maryland: Johns Hopkins University.                                                                         |
| USA, Alabama         | Johns Hopkins University. 2019 Novel Coronavirus COVID-19 (2019-nCoV) Data Repository by Johns Hopkins CSSE. Baltimore, Maryland: Johns Hopkins University.                                                                         |
| USA, Alaska          | Johns Hopkins University. 2019 Novel Coronavirus COVID-19 (2019-nCoV) Data Repository by Johns Hopkins CSSE. Baltimore, Maryland: Johns Hopkins University.                                                                         |
| USA, Arizona         | Johns Hopkins University. 2019 Novel Coronavirus COVID-19 (2019-nCoV) Data Repository by Johns Hopkins CSSE. Baltimore, Maryland: Johns Hopkins University.                                                                         |
| USA, Arkansas        | Johns Hopkins University. 2019 Novel Coronavirus COVID-19 (2019-nCoV) Data Repository by Johns Hopkins CSSE. Baltimore, Maryland: Johns Hopkins University.                                                                         |
| USA, California      | Johns Hopkins University. 2019 Novel Coronavirus COVID-19 (2019-nCoV) Data Repository by Johns Hopkins CSSE. Baltimore, Maryland: Johns Hopkins University.                                                                         |
| USA, Colorado        | Johns Hopkins University. 2019 Novel Coronavirus COVID-19 (2019-nCoV) Data Repository by Johns Hopkins CSSE. Baltimore, Maryland: Johns Hopkins University.                                                                         |
| USA, Connecticut     | Johns Hopkins University. 2019 Novel Coronavirus COVID-19 (2019-nCoV) Data Repository by Johns Hopkins CSSE. Baltimore, Maryland: Johns Hopkins University.                                                                         |
| USA, Delaware        | Delaware Division of Public Health (United States). United States - Delaware Division of Public Health Coronavirus Disease (COVID-19) Data Dashboard. United States of America: Delaware Division of Public Health (United States). |
| USA, Florida         | Johns Hopkins University. 2019 Novel Coronavirus COVID-19 (2019-nCoV) Data Repository by Johns Hopkins CSSE. Baltimore, Maryland: Johns Hopkins University.                                                                         |
| USA, Georgia         | Johns Hopkins University. 2019 Novel Coronavirus COVID-19 (2019-nCoV) Data Repository by Johns Hopkins CSSE. Baltimore, Maryland: Johns Hopkins University.                                                                         |

|                    |                                                                                                                                                                                       |
|--------------------|---------------------------------------------------------------------------------------------------------------------------------------------------------------------------------------|
| USA, Hawaii        | Hawaii State Department of Health. United States - Hawaii Department of Health COVID-19 Current Situation. Honolulu, HI, United States of America: Hawaii State Department of Health. |
| USA, Idaho         | Johns Hopkins University. 2019 Novel Coronavirus COVID-19 (2019-nCoV) Data Repository by Johns Hopkins CSSE. Baltimore, Maryland: Johns Hopkins University.                           |
| USA, Illinois      | Johns Hopkins University. 2019 Novel Coronavirus COVID-19 (2019-nCoV) Data Repository by Johns Hopkins CSSE. Baltimore, Maryland: Johns Hopkins University.                           |
| USA, Indiana       | Johns Hopkins University. 2019 Novel Coronavirus COVID-19 (2019-nCoV) Data Repository by Johns Hopkins CSSE. Baltimore, Maryland: Johns Hopkins University.                           |
| USA, Iowa          | Johns Hopkins University. 2019 Novel Coronavirus COVID-19 (2019-nCoV) Data Repository by Johns Hopkins CSSE. Baltimore, Maryland: Johns Hopkins University.                           |
| USA, Kansas        | Johns Hopkins University. 2019 Novel Coronavirus COVID-19 (2019-nCoV) Data Repository by Johns Hopkins CSSE. Baltimore, Maryland: Johns Hopkins University.                           |
| USA, Kentucky      | Johns Hopkins University. 2019 Novel Coronavirus COVID-19 (2019-nCoV) Data Repository by Johns Hopkins CSSE. Baltimore, Maryland: Johns Hopkins University.                           |
| USA, Louisiana     | Johns Hopkins University. 2019 Novel Coronavirus COVID-19 (2019-nCoV) Data Repository by Johns Hopkins CSSE. Baltimore, Maryland: Johns Hopkins University.                           |
| USA, Maine         | Johns Hopkins University. 2019 Novel Coronavirus COVID-19 (2019-nCoV) Data Repository by Johns Hopkins CSSE. Baltimore, Maryland: Johns Hopkins University.                           |
| USA, Maryland      | Johns Hopkins University. 2019 Novel Coronavirus COVID-19 (2019-nCoV) Data Repository by Johns Hopkins CSSE. Baltimore, Maryland: Johns Hopkins University.                           |
| USA, Massachusetts | Johns Hopkins University. 2019 Novel Coronavirus COVID-19 (2019-nCoV) Data Repository by Johns Hopkins CSSE. Baltimore, Maryland: Johns Hopkins University.                           |
| USA, Michigan      | Johns Hopkins University. 2019 Novel Coronavirus COVID-19 (2019-nCoV) Data Repository by Johns Hopkins CSSE. Baltimore, Maryland: Johns Hopkins University.                           |
| USA, Minnesota     | Johns Hopkins University. 2019 Novel Coronavirus COVID-19 (2019-nCoV) Data Repository by Johns Hopkins CSSE. Baltimore, Maryland: Johns Hopkins University.                           |
| USA, Mississippi   | Johns Hopkins University. 2019 Novel Coronavirus COVID-19 (2019-nCoV) Data Repository by Johns Hopkins CSSE. Baltimore, Maryland: Johns Hopkins University.                           |
| USA, Missouri      | Johns Hopkins University. 2019 Novel Coronavirus COVID-19 (2019-nCoV) Data Repository by Johns Hopkins CSSE. Baltimore, Maryland: Johns Hopkins University.                           |
| USA, Montana       | Johns Hopkins University. 2019 Novel Coronavirus COVID-19 (2019-nCoV) Data Repository by Johns Hopkins CSSE. Baltimore, Maryland: Johns Hopkins University.                           |
| USA, Nebraska      | Johns Hopkins University. 2019 Novel Coronavirus COVID-19 (2019-nCoV) Data Repository by Johns Hopkins CSSE. Baltimore, Maryland: Johns Hopkins University.                           |

|                     |                                                                                                                                                                                                                                            |
|---------------------|--------------------------------------------------------------------------------------------------------------------------------------------------------------------------------------------------------------------------------------------|
| USA, Nevada         | Johns Hopkins University. 2019 Novel Coronavirus COVID-19 (2019-nCoV) Data Repository by Johns Hopkins CSSE. Baltimore, Maryland: Johns Hopkins University.                                                                                |
| USA, New Hampshire  | Johns Hopkins University. 2019 Novel Coronavirus COVID-19 (2019-nCoV) Data Repository by Johns Hopkins CSSE. Baltimore, Maryland: Johns Hopkins University.                                                                                |
| USA, New Jersey     | Johns Hopkins University. 2019 Novel Coronavirus COVID-19 (2019-nCoV) Data Repository by Johns Hopkins CSSE. Baltimore, Maryland: Johns Hopkins University.                                                                                |
| USA, New Mexico     | Johns Hopkins University. 2019 Novel Coronavirus COVID-19 (2019-nCoV) Data Repository by Johns Hopkins CSSE. Baltimore, Maryland: Johns Hopkins University.                                                                                |
| USA, New York       | New York Times. COVID-19 Cumulative Deaths and Cases in the United States by County - New York Times. New York, United States of America: New York Times.                                                                                  |
| USA, New York       | New York City Department of Health and Mental Hygiene. United States - New York City Department of Health and Mental Hygiene COVID-19 Data. New York, NY, United States of America: New York City Department of Health and Mental Hygiene. |
| USA, New York       | Johns Hopkins University. 2019 Novel Coronavirus COVID-19 (2019-nCoV) Data Repository by Johns Hopkins CSSE. Baltimore, Maryland: Johns Hopkins University.                                                                                |
| USA, North Carolina | Johns Hopkins University. 2019 Novel Coronavirus COVID-19 (2019-nCoV) Data Repository by Johns Hopkins CSSE. Baltimore, Maryland: Johns Hopkins University.                                                                                |
| USA, North Dakota   | Johns Hopkins University. 2019 Novel Coronavirus COVID-19 (2019-nCoV) Data Repository by Johns Hopkins CSSE. Baltimore, Maryland: Johns Hopkins University.                                                                                |
| USA, Ohio           | Ohio Department of Health. United States - Ohio Department of Health Coronavirus (COVID-19) Updates. Columbus, OH, United States of America: Ohio Department of Health.                                                                    |
| USA, Oklahoma       | Johns Hopkins University. 2019 Novel Coronavirus COVID-19 (2019-nCoV) Data Repository by Johns Hopkins CSSE. Baltimore, Maryland: Johns Hopkins University.                                                                                |
| USA, Oregon         | Oregon Health Authority (United States). United States - Oregon Health Authority COVID-19 Updates. Salem, United States of America: Oregon Health Authority (United States).                                                               |
| USA, Pennsylvania   | Johns Hopkins University. 2019 Novel Coronavirus COVID-19 (2019-nCoV) Data Repository by Johns Hopkins CSSE. Baltimore, Maryland: Johns Hopkins University.                                                                                |
| USA, Rhode Island   | Johns Hopkins University. 2019 Novel Coronavirus COVID-19 (2019-nCoV) Data Repository by Johns Hopkins CSSE. Baltimore, Maryland: Johns Hopkins University.                                                                                |
| USA, South Carolina | Johns Hopkins University. 2019 Novel Coronavirus COVID-19 (2019-nCoV) Data Repository by Johns Hopkins CSSE. Baltimore, Maryland: Johns Hopkins University.                                                                                |
| USA, South Dakota   | Johns Hopkins University. 2019 Novel Coronavirus COVID-19 (2019-nCoV) Data Repository by Johns Hopkins CSSE. Baltimore, Maryland: Johns Hopkins University.                                                                                |
| USA, Tennessee      | Johns Hopkins University. 2019 Novel Coronavirus COVID-19 (2019-nCoV) Data Repository by Johns Hopkins CSSE. Baltimore, Maryland: Johns Hopkins University.                                                                                |

|                     |                                                                                                                                                             |
|---------------------|-------------------------------------------------------------------------------------------------------------------------------------------------------------|
| USA, Texas          | Johns Hopkins University. 2019 Novel Coronavirus COVID-19 (2019-nCoV) Data Repository by Johns Hopkins CSSE. Baltimore, Maryland: Johns Hopkins University. |
| USA, Utah           | Johns Hopkins University. 2019 Novel Coronavirus COVID-19 (2019-nCoV) Data Repository by Johns Hopkins CSSE. Baltimore, Maryland: Johns Hopkins University. |
| USA, Vermont        | Johns Hopkins University. 2019 Novel Coronavirus COVID-19 (2019-nCoV) Data Repository by Johns Hopkins CSSE. Baltimore, Maryland: Johns Hopkins University. |
| USA, Virginia       | Johns Hopkins University. 2019 Novel Coronavirus COVID-19 (2019-nCoV) Data Repository by Johns Hopkins CSSE. Baltimore, Maryland: Johns Hopkins University. |
| USA, Washington     | New York Times. COVID-19 Cumulative Deaths and Cases in the United States by County - New York Times. New York, United States of America: New York Times.   |
| USA, Washington, DC | Johns Hopkins University. 2019 Novel Coronavirus COVID-19 (2019-nCoV) Data Repository by Johns Hopkins CSSE. Baltimore, Maryland: Johns Hopkins University. |
| USA, West Virginia  | Johns Hopkins University. 2019 Novel Coronavirus COVID-19 (2019-nCoV) Data Repository by Johns Hopkins CSSE. Baltimore, Maryland: Johns Hopkins University. |
| USA, Wisconsin      | Johns Hopkins University. 2019 Novel Coronavirus COVID-19 (2019-nCoV) Data Repository by Johns Hopkins CSSE. Baltimore, Maryland: Johns Hopkins University. |
| USA, Wyoming        | Johns Hopkins University. 2019 Novel Coronavirus COVID-19 (2019-nCoV) Data Repository by Johns Hopkins CSSE. Baltimore, Maryland: Johns Hopkins University. |
| Uzbekistan          | Johns Hopkins University. 2019 Novel Coronavirus COVID-19 (2019-nCoV) Data Repository by Johns Hopkins CSSE. Baltimore, Maryland: Johns Hopkins University. |
| Vanuatu             | Johns Hopkins University. 2019 Novel Coronavirus COVID-19 (2019-nCoV) Data Repository by Johns Hopkins CSSE. Baltimore, Maryland: Johns Hopkins University. |
| Venezuela           | Johns Hopkins University. 2019 Novel Coronavirus COVID-19 (2019-nCoV) Data Repository by Johns Hopkins CSSE. Baltimore, Maryland: Johns Hopkins University. |
| Vietnam             | Johns Hopkins University. 2019 Novel Coronavirus COVID-19 (2019-nCoV) Data Repository by Johns Hopkins CSSE. Baltimore, Maryland: Johns Hopkins University. |
| Virgin Islands      | Johns Hopkins University. 2019 Novel Coronavirus COVID-19 (2019-nCoV) Data Repository by Johns Hopkins CSSE. Baltimore, Maryland: Johns Hopkins University. |
| Yemen               | Johns Hopkins University. 2019 Novel Coronavirus COVID-19 (2019-nCoV) Data Repository by Johns Hopkins CSSE. Baltimore, Maryland: Johns Hopkins University. |
| Zambia              | Johns Hopkins University. 2019 Novel Coronavirus COVID-19 (2019-nCoV) Data Repository by Johns Hopkins CSSE. Baltimore, Maryland: Johns Hopkins University. |
| Zimbabwe            | Johns Hopkins University. 2019 Novel Coronavirus COVID-19 (2019-nCoV) Data Repository by Johns Hopkins CSSE. Baltimore, Maryland: Johns Hopkins University. |

## Section 4. Methods

Excess mortality due to COVID-19 is defined as the difference between reported all-cause mortality, after any necessary adjustments including under reporting, and what would have otherwise been observed without the COVID-19 pandemic. This includes both deaths directly attributed to COVID-19 – people who died from the virus – and the net effect of increases or decreases in other causes of death as a result of the pandemic and its associated behavioural and economic changes.

To estimate excess mortality, we need to begin with estimating *expected all-cause mortality* based on past levels and trends. This expected mortality becomes a counterfactual against which we can compare the observed all-cause deaths during the pandemic.

### Section 4.1 Estimating expected mortality

In this section, we describe the estimation of expected mortality, only for a subset of locations where time-detailed (weekly or monthly) all-cause mortality data are available for years before and during the pandemic. Time detailed data is used instead of annual data to help capture the effect of the epidemic on all-cause mortality through the course of the pandemic at the population level.

We used an ensemble model to estimate expected mortality in 2020 and 2021, based on observed weekly or monthly all-cause mortality between the earliest year such data is available since 2010 and early 2020 before pandemic started outside of China. This ensemble had three model families: REGMOD, Poisson regression, and a simple assumption where weekly/monthly mortality rate from last-year is held constant, which we will describe in this section.

To formulate the expected mortality models detailed here, let  $d$  be death counts,  $y$  be year,  $t$  be time (week or month), and  $p$  be population, and index the data with  $i$ .

Each of the models described are fit separately by location for both sexes and all age group combined data.

#### Section 4.1.1 REGMOD

The first set of submodels in our ensemble belong to a family which uses the `regmod` (<https://pypi.org/project/regmod/>) package for general regression modelling. While `regmod` is the foundation, we also developed for this project a secondary package specifically intended for excess mortality modelling – `emmodel` (<https://github.com/ihmeuw-msca/emmodel>).

The `regmod` model examines levels of and trends in mortality in two parts: seasonality and secular time trend.

The seasonality model is formulated as follows:

$$d_i \sim \text{Poisson}(\mu_i) \\ \mu_i = \exp(\log(p_i) + \text{spline}(t_i))$$

such that death counts are the dependent variable, and they are predicted by a spline on week or month, with a population offset. Note that the year variable does not appear in this step, so the prediction is purely based on seasonality of mortality. Now let the prediction from this step by denoted  $\hat{\mu}^s$ .

Next, we estimate the secular time trend – or the remaining trend that is not explained by seasonality in mortality. First, create a chronological index for time:  $c = ys + t$  where  $s$  is the number of detailed time units in a year (12 months; 52 or 53 weeks). Then, we fit a model for time trend:

$$d_i \sim \text{Poisson}(\mu_i)$$

$$\mu_i = \exp(\log(\hat{\mu}_i^s) + \text{spline}(c_i))$$

such that the offset is now the prediction from the seasonality model and the predictor is now our chronological index. Let the prediction from this step be denoted  $\hat{\mu}^m$ . This value becomes our final prediction for expected mortality – it combines both seasonality and the secular time trend.

One challenge with using splines to predict expected mortality is that extrapolation beyond the range of the input data is often highly sensitive to spline specification. For the time-trend step, which is responsible for dictating the extrapolation, we chose to use splines with degree 1 (linear) rather than splines with degree 3 (cubic), because the tails on linear splines will not be as extreme, especially for small population where there tends to have more random fluctuation in mortality level in a relatively short time period. The placement of the last internal knot is the other part of spline specification which we found to be impactful. To address this, we included four different `regmod` models in our ensemble, where the four submodels varied on the basis of knot placement (last internal knot 6, 12, 18, and 24 months prior to the last included data point).

#### Section 4.1.2 Poisson regression

The next model family used fixed effects to model seasonality and yearly effects simultaneously:

$$d_i \sim \text{Poisson}(\lambda_i) \\ \log(\lambda_i) = \beta + \alpha_y + \alpha_t + \log(p_i)$$

Where  $\beta$  is an intercept, and  $\alpha_y$  and  $\alpha_t$  are random intercepts on dummy variables for year and time (week or month). We fit this model using the `glm` function in the `stats` R package. One challenge with this model is that the year effect for 2020 comes only from the first three months and is therefore sensitive to 2020 trends in those months. The year effect for 2021 is set equal to the year effect for 2020.

#### Section 4.1.3 Last-year

The final submodel family for our ensemble is the last-year model. This is a simple model which states that the expected weekly mortality for one year is equal to the observed mortality for the same week in the previous year. For 2021, predicted mortality is observed mortality in 2019. Formally:

$$\hat{d}_{t,y} = d_{t,y-1} \text{ for } y < 2021 \\ \hat{d}_{t,y} = d_{t,y=2019} \text{ for } y = 2021$$

#### Section 4.1.4 Ensemble

The ensemble weights are formulated by first fitting all sub-models to data up to March 2019, and then comparing expected mortality for 2019 from these fits to observed mortality between March and December of 2019. This out-of-sample validation test demonstrates model performance at extrapolating levels of mortality outside of the range of the input data and is a proxy for how well the models will perform in predicting expected mortality in the absence of the COVID-19 pandemic.

After fitting our out-of-sample test models, we evaluate root mean square error across all 2019 location-weeks in our analysis (but only for all-age both-sexes combined models):

$$RMSE_m = \sqrt{\frac{\sum_i (d_{o,i} - d_{e,i})^2}{n}}$$



Where  $m$  is the submodel,  $d_o$  is the observed death rate,  $d_e$  is the expected death rate from the model prediction,  $i$  is an index for location-week, and  $n$  is the total number of location-weeks. From here, weights are computed as  $\frac{1}{RMSE^2}$  to give larger weights to submodels that have smaller root mean square error on average, effectively giving more weights to models that are more precise based on the global out of sample predictive validity testing. Then, these weights are scaled to sum to 1 across all submodels.

The resulting RMSE values and weights are given in table S4 below:

**Table S4. Root Mean Squared Error and weights for models used in the Ensemble modelling process**

| Model Type            | RMSE     | Ensemble weight |
|-----------------------|----------|-----------------|
| Regmod, 24 month      | 0.000693 | 0.218           |
| Regmod, 18 month      | 0.000707 | 0.209           |
| Regmod, 12 month      | 0.000781 | 0.171           |
| Regmod, 6 month       | 0.000968 | 0.111           |
| Poisson fixed effects | 0.000811 | 0.159           |
| Previous Year         | 0.000889 | 0.132           |

The final expected mortality from the ensemble model is a weighted average of the sub-models, using this weighting scheme.

## Section 4.2 Predicting excess mortality for all locations

In our analysis, we predict excess mortality rate for all locations for the uniform cumulative period of January 1, 2020, to December 31, 2021, using a statistical model developed for this project that examines the relationship between excess mortality rate and key covariates pertaining to both the COVID-19 pandemic and background population health metrics. This modelling process involves three steps described below.

### Section 4.2.1 Compiling a database on excess mortality rate and its relevant covariates for various time period by location after accounting for late registration and under registration.

As Figure 1 in the manuscript shows, late registration issue is pervasive even for countries that have routine and complete vital registration system evaluated for data released by calendar year. For the empirical excess mortality rates we used in the regression, instead of use all weeks and months with available all-cause mortality data and estimated expected level of mortality, we restricted the input to the calculation of excess mortality to time periods that are not affected by the late registration issue by location. Detailed assessment of late registration issue by location, where routine release of data by week or month is available, can be found in appendix figure S6. In addition, we have also excluded data from weeks 31–33 in western Europe where this were sharp increases in all-cause mortality even though the transmission of COVID-19 was extremely low during the same period. This phenomenon can be demonstrated by reported all-cause mortality in Germany by week between 2016 and 2021 below.

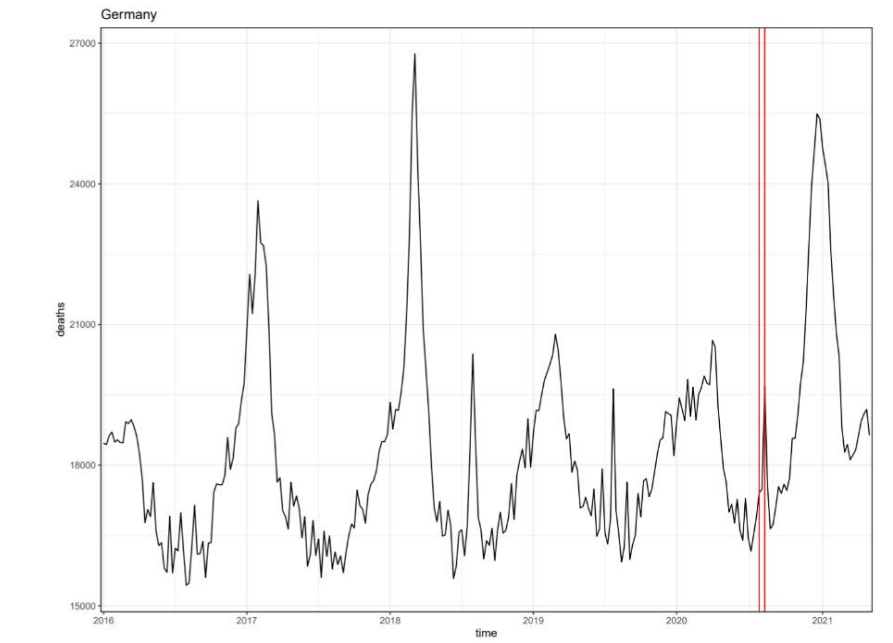

In addition to cumulative excess mortality calculated using time detailed excess mortality estimated using reported all-cause mortality as described above, we also collected excess mortality from two other countries. For South Africa, we used estimated excess mortality rate at province level provided by the Medical Research Council<sup>2</sup> of South Africa where all-cause mortality data for time period during the pandemic have not been made publicly available. For India, while complete and time detailed Sample Registration data and Civil Registration data are not available, report on deaths from the Civil Registration System for selected months during 2020 and 2021 were made available for 12 states in India. After accounting for under registration of the Civil Registration System by comparing reported death from it with those estimated by the Global Burden of Disease Study 2019 at the state level, we calculate excess mortality rate for those states during the months with reported deaths during the pandemic by comparing those numbers with average reported deaths for the same period in year 2018 and 2019.

#### Section 4.2.2 A statistical model for predicting excess mortality rate

Using data on both the COVID-19 pandemic and background population health variables from the location and time period with cumulative excess mortality as described above, we build a statistical model to predict excess mortality rate using relevant covariates. In addition to COVID-19 related covariates such as seroprevalence, we also examined a variety of population health related covariates as suggested by the meta-analysis conducted by the US Centers for Disease Control and Prevention.<sup>3</sup> The full list of covariates we have examined is shown in the table below:

**Table S5. Covariates selected for use in the final model with direction of influence**

| Covariate                                  | Scale | Direction |
|--------------------------------------------|-------|-----------|
| Average absolute latitude                  |       | Positive  |
| Cardiovascular diseases death rate (2019)  | Log   | Positive  |
| Crude death rate (2019)                    | Log   | Positive  |
| Diabetes death rate (2019)                 | Log   | Positive  |
| Healthcare access and quality Index (2019) |       | Negative  |
| HIV death rate (2019)                      | Log   | Positive  |
| Infection detection ratio (lagged)         |       | Negative  |
| Inpatient admission rate (2019)            |       | Negative  |
| Mobility (lagged)                          |       | Positive  |

|                                             |     |          |
|---------------------------------------------|-----|----------|
| Proportion of population over age 75        |     | Positive |
| Quality of death registration system (2019) |     | Negative |
| Reported COVID-19 death rate                | Log | Positive |
| Seroprevalence rate (lagged)                | Log | Positive |
| Smoking prevalence (2019)                   |     | Positive |
| Universal health coverage (2019)            |     | Negative |

**Table S6. List of covariates assessed for use in the model**

| <b>Covariate</b>                                                    |
|---------------------------------------------------------------------|
| Average absolute latitude                                           |
| Cardiovascular diseases death rate (2019)                           |
| Chronic kidney disease death rate (2019)                            |
| Cirrhosis death rate (2019)                                         |
| Congenital down syndrome death rate (2019)                          |
| Crude death rate (2019)                                             |
| Crude death rate standard deviation 1990 (2019)                     |
| Crude death rate standard deviation 2000 (2019)                     |
| Cumulative infected                                                 |
| Cumulative infected (lagged)                                        |
| CVD pulmonary arterial hypertension death rate (2019)               |
| CVD stroke intracerebral haemorrhage death rate (2019)              |
| Diabetes mellitus death rate (2019)                                 |
| Diabetes prevalence (2019)                                          |
| Endocrine, metabolic, blood, and immune disorders death rate (2019) |
| Healthcare access and quality Index (2019)                          |
| HIV death rate (2019)                                               |
| Hypertension prevalence (2019)                                      |
| Infection detection ratio                                           |
| Infection detection ratio (lagged)                                  |
| Inpatient admission rate (2019)                                     |
| Mean population age                                                 |
| Mobility                                                            |
| Mobility (lagged)                                                   |
| Neoplasms death rate (2019)                                         |
| Neurological disorders death rate (2019)                            |
| Non-communicable diseases death rate (2019)                         |
| Obesity prevalence (2019)                                           |
| Proportion of population over age 60                                |
| Proportion of population over age 70                                |
| Proportion of population over age 75                                |
| Proportion of population over age 80                                |
| Proportion of population over age 85                                |
| Quality of death registration system (2019)                         |
| Reported COVID-19 death rate                                        |
| Respiratory asthma death rate (2019)                                |
| Seroprevalence rate                                                 |
| Seroprevalence rate (lagged)                                        |

|                                         |
|-----------------------------------------|
| Sickle cell disorders death rate (2019) |
| Smoking prevalence (2019)               |
| Substance abuse death rate (2019)       |
| Thalassemia death rate (2019)           |
| Universal health coverage (2019)        |

To arrive at a parsimonious model, we used the Least Absolute Shrinkage and Selection Operator (LASSO) regression to help select a list of covariates that have sensible direction of effect on the excess mortality rate due to the COVID-19 pandemic. The final model can be described by the equation below:

$$\ln(y_i) = \alpha + \sum_{j=1}^{16} \beta_j \cdot x_{ij} + \epsilon_i$$

where  $y_i$  is the excess mortality rate for location  $i$ , and  $x$  is the list of covariates selected through the LASSO regression. The list of covariates included in our final model includes: lagged cumulative infections (seroprevalence) rate in log space, COVID-19 death rate in log space, crude death rate in log space, lagged IDR, annual inpatient admissions per capita, diabetes prevalence, HIV death rate in log space, lagged mobility, binned quality of vital registration data, average absolute latitude, chronic kidney disease (CKD) death rate in log space, sickle cell disorders death rate in log space, smoking prevalence, Healthcare Access and Quality Index (HAQ Index) proportion of population aged 75 or older, and substance abuse death rate in log space.

To account for the residuals not accounted for by the selected covariates, we generated regional and super regional level mean residuals for prediction of excess mortality rate for the uniform time period of January 2020 and September 2021. As the empirical data on excess mortality rate for states in India are collected for limited months during the pandemic, average of in-sample state level residuals are used for prediction of excess mortality for all states in India.

#### Section 4.2.3. Predict excess mortality rate for the cumulative period of January 1 2020 and December, 31 2021

To account for uncertainties in both the coefficients of the covariates and the residuals described above, and the uncertainties in the covariates for the uniform period of January 1 2020 to December 31 2021, the prediction of excess mortality for each location is done at the draw level for 100 times. For each draw level prediction, we first run the same log-linear regression using draw level input excess mortality rate for each location and draw level covariate to estimate both draw level coefficients for the covariates and the residual. Then the draw level coefficients and residuals are paired up with draw level covariates for the uniform cumulative time period of January 1, 2020, to December 31, 2021 to produce excess mortality rate for each location for this draw. The same process is repeated 100 times, from which mean and 95% uncertainty interval of excess mortality rate are generated for each location. Aggregates for region, super region, and global level are generated based these draw level predictions.

We did not set up the excess mortality prediction model to deal with situations where excess mortality rate is negative. Based on our assessment of expected mortality using ensemble model described in section 4.1.1 and the reported all-cause mortality, there are six countries and territories in the world where excess mortality rate during the pandemic was estimated to be negative, after accounting for late registration. Given the limited information available to build a sensible statistical model, we opted to use the excess mortality rate estimated using the ensemble model as the final estimates for these locations.

## Section 5. References

1 Stevens GA, Alkema L, Black RE, *et al.* Guidelines for Accurate and Transparent Health Estimates Reporting: the GATHER statement. *The Lancet* 2016; **388**: e19–23.

2 South African Medical Research Council. Report on Weekly Deaths in South Africa. South African Medical Research Council. 2022; published online Feb 9. <https://www.samrc.ac.za/reports/report-weekly-deaths-south-africa> (accessed Feb 11, 2022).

3 Centers for Disease Control and Prevention. Science brief: evidence used to update the list of underlying medical conditions associated with higher risk for severe COVID-19. Centers for Disease Control and Prevention. 2021; published online Oct 14. <https://www.cdc.gov/coronavirus/2019-ncov/science/science-briefs/underlying-evidence-table.html> (accessed Oct 29, 2021).

## **Section 6. Author contributions**

### **Managing the estimation or publication process**

Tahiya Alam and Haidong Wang.

### **Writing the first draft of the manuscript**

Catherine Bisignano, Katherine R Paulson, and Haidong Wang.

### **Primary responsibility for applying analytical methods to produce estimates**

Aleksandr Y Aravkin, Ryan M Barber, Haley Comfort, Katherine R Paulson, Spencer A Pease, Stefanie Watson, and Peng Zheng.

### **Primary responsibility for seeking, cataloguing, extracting, or cleaning data; designing or coding figures and tables**

Bree Bang-Jensen, Jhilik Chattopadhyay, Rebecca M Cogen, Haley Comfort, Samuel B Ewald, Alize J Ferrari, Meghan E Frisch, John E Fuller, Gaorui Guo, Monika Helak, Erin N Hulland, Alice Lazzar-Atwood, Kate E LeGrand, Akiya Lindstrom, Ana M Mantilla Herrera, Erin A May, Ali H Mokdad, Mohsen Naghavi, Paulami Naik, James Kevin O'Halloran, Katherine R Paulson, Louise Penberthy, David M Pigott, Damian Francesco Santomauro, Emma Elizabeth Spurlock, Ruri Syailendrawati, Christopher E Troeger, Haidong Wang, Stefanie Watson, and Bethany Zigler.

### **Providing data or critical feedback on data sources**

Cristiana Abbafati, Christopher Adolph, Bree Bang-Jensen, Ryan M Barber, Gregory J Bertolacci, Suman Chakrabarti, William James Dangel, Carolyn Dapper, Bruce B Duncan, Megan Erickson, Nancy Fullman, Emmanuela Gakidou, John Gallagher, Amiran Gamkrelidze, Gaorui Guo, Monika Helak, Erin N Hulland, Darwin Phan Jones, Maia Kereselidze, Kate E LeGrand, Paulo A Lotufo, Rafael Lozano, Beatrice Magistro, Deborah Carvalho Malta, Johan Månsson, Fatima Marinho, Alemnesh H Mirkuzie, Ali H Mokdad, Lorenzo Monasta, Christopher J L Murray, Mohsen Naghavi, Shuhei Nomura, Edward G O'Brien, Latera Tesfaye Olana, David M Pigott, Grace Reinke, Antonio Luiz P Ribeiro, Damian Francesco Santomauro, Maria Inês Schmidt, David H Shaw, Brittney S Sheena, Natia Skhvitardze, Reed J D Sorensen, Awoke Temesgen Misganaw, Rebecca Walcott, Haidong Wang, Stefanie Watson, Charles Shey Wiysonge, and Nahom Alemseged Worku.

### **Developing methods or computational machinery**

Adrien Allorant, Aleksandr Y Aravkin, Austin Carter, Emma Castro, Suman Chakrabarti, James K Collins, Haley Comfort, Kimberly Cooperrider, Xiaochen Dai, Farah Daoud, Tatiana Fedosseeva, Joseph Jon Frostad, Gaorui Guo, Jiawei He, Nathaniel J Henry, Emily Linebarger, Ali H Mokdad, Christopher J LMurray, Mohsen Naghavi, Katherine R Paulson, Spencer A Pease, Robert C Reiner Jr, David H Shaw, Brittney S Sheena, Aleksei Sholokhov, Reed J DSorensen, Emma Elizabeth Spurlock, Haidong Wang, and Peng Zheng.

### **Providing critical feedback on methods or results**

Cristiana Abbafati, Ryan M Barber, James K Collins, Xiaochen Dai, William James Dangel, Emmanuela Gakidou, Amiran Gamkrelidze, Simon I Hay, Nathaniel J Henry, Stephen S Lim, Rafael Lozano, Deborah Carvalho Malta, Fatima Marinho, Alemnesh H Mirkuzie, Ali H Mokdad, Christopher J L Murray, Mohsen Naghavi, Latera Tesfaye Olana, Samuel M Ostroff, Katherine R Paulson, Spencer A Pease, David M Pigott, Robert C Reiner Jr, Antonio Luiz P Ribeiro, Natia Skhvitardze, Reed J D Sorensen, Emma Elizabeth Spurlock, Roman Topor-Madry, Christopher E Troeger, Ally Walker, Haidong Wang, Stefanie Watson, Charles Shey Wiysonge, and Nahom Alemseged Worku.

### **Drafting the work or revising it critically for important intellectual content**

Cristiana Abbafati, Catherine Bisignano, Haley Comfort, Simon I Hay, Paulo A Lotufo, Deborah Carvalho Malta, Ali H Mokdad, Lorenzo Monasta, Christopher J L Murray, Mohsen Naghavi, Samuel M Ostroff, Katherine R

Paulson, Antonio Luiz P Ribeiro, Roman Topor-Madry, Haidong Wang, Stefanie Watson, and Charles Shey Wiysonge.

**Managing the overall research enterprise**

Tahiya Alam, Joanne O Amlag, Sabina S Bloom, Kimberly Cooperrider, William James Dangel, Amanda Deen, Simon I Hay, Bethany Huntley, Ali H Mokdad, Christopher J L Murray, Mohsen Naghavi, Emma Elizabeth Spurlock, Roman Topor-Madry, and Haidong Wang.

## Section 7. Supplemental Tables and Figures

Figure S1. Map of all cause data availability

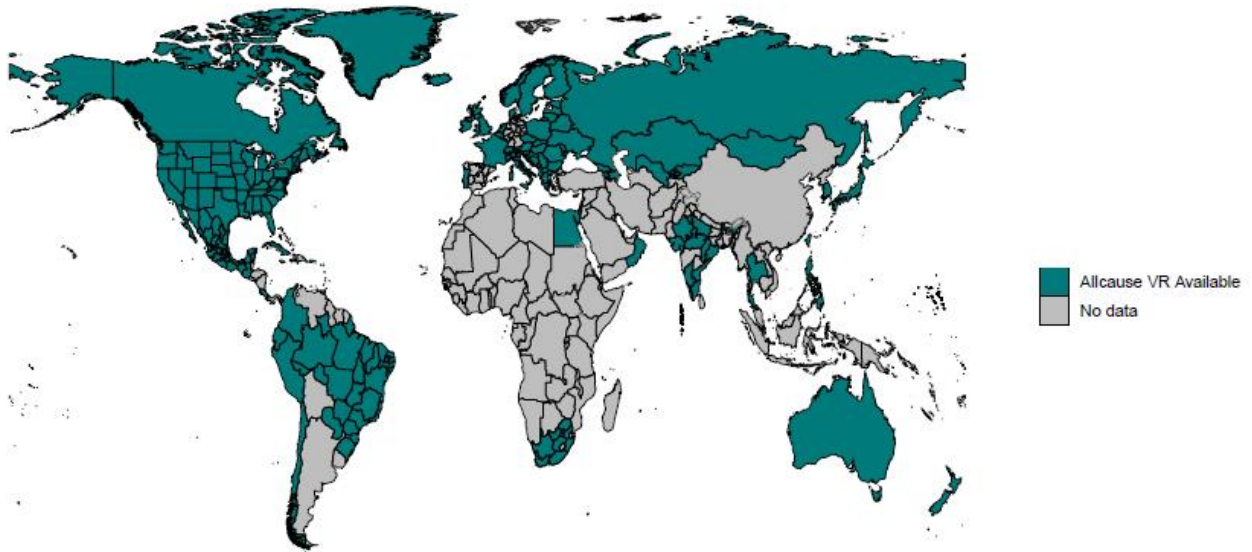

Figure S2. Map of reported Covid19 mortality data availability

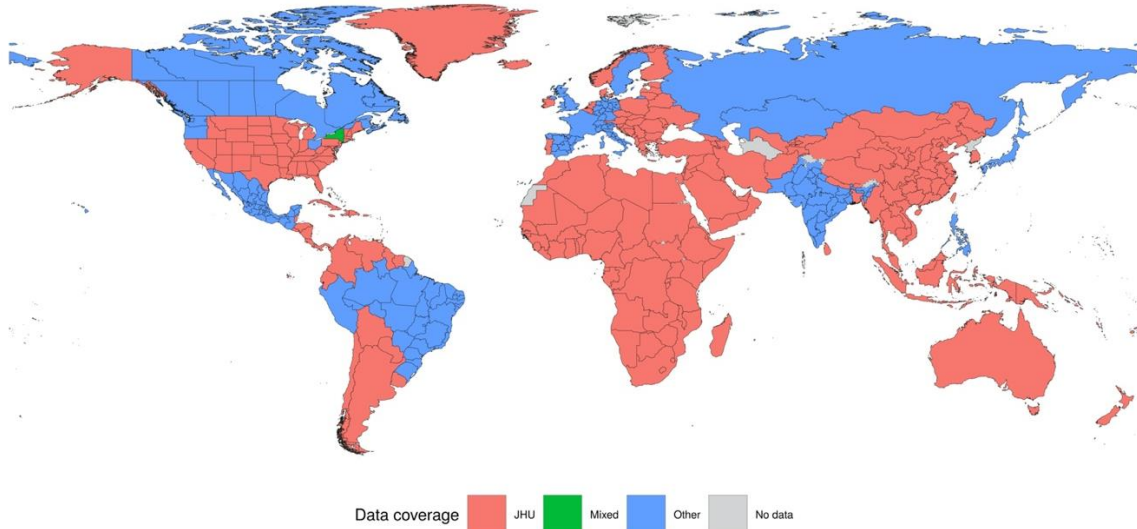



Figure S3. Estimating expected mortality based on seasonality and secular trends

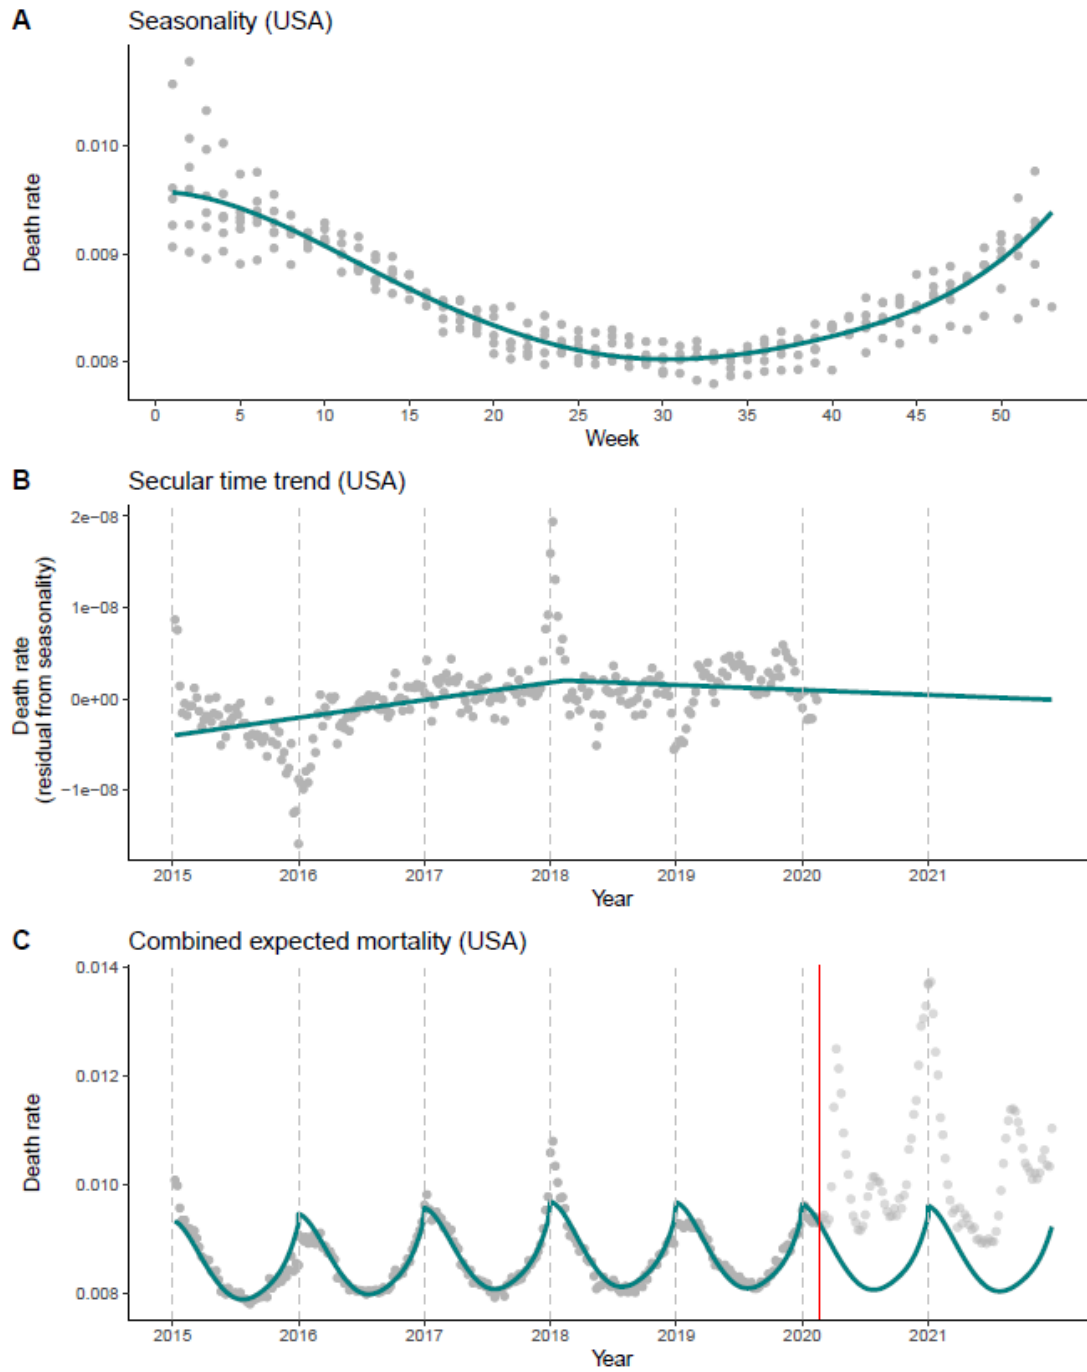

Figure S4. (a) The distribution of RMSE by location for each of six models included in the ensemble model, and (b) the estimated excess mortality for Spain for each component model and for the ensemble.

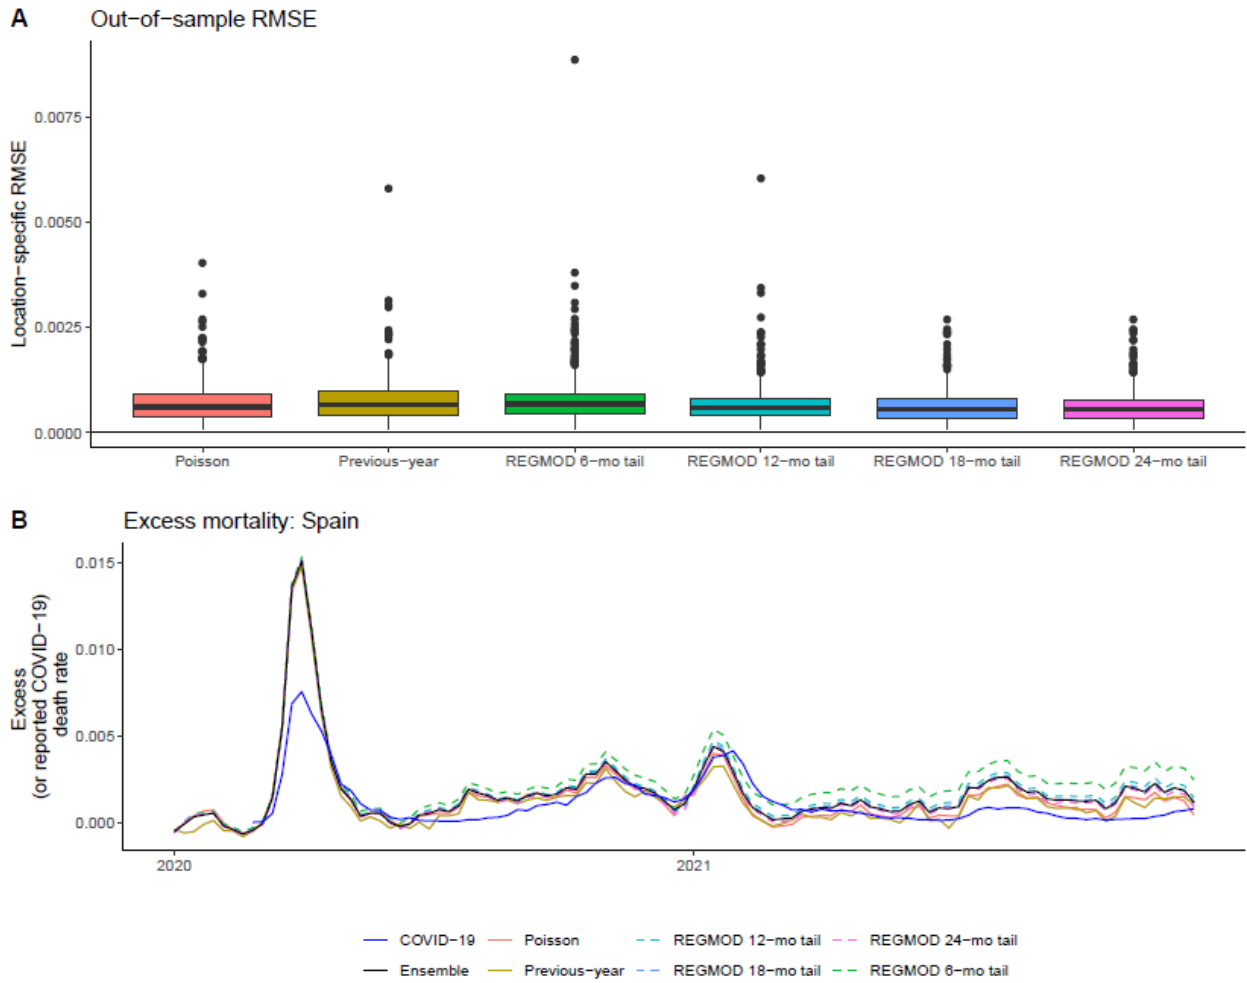

Figure S5. Comparison to *The Economist* excess mortality estimates

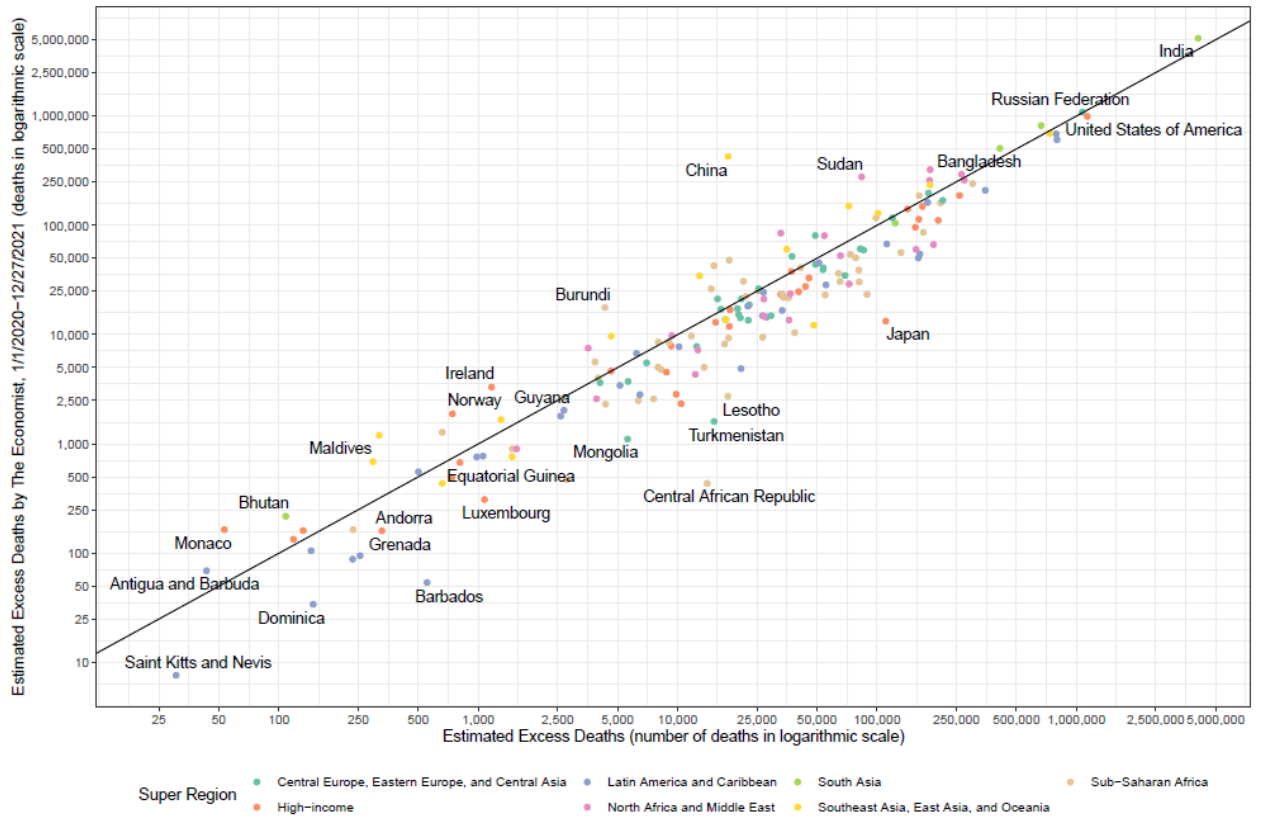

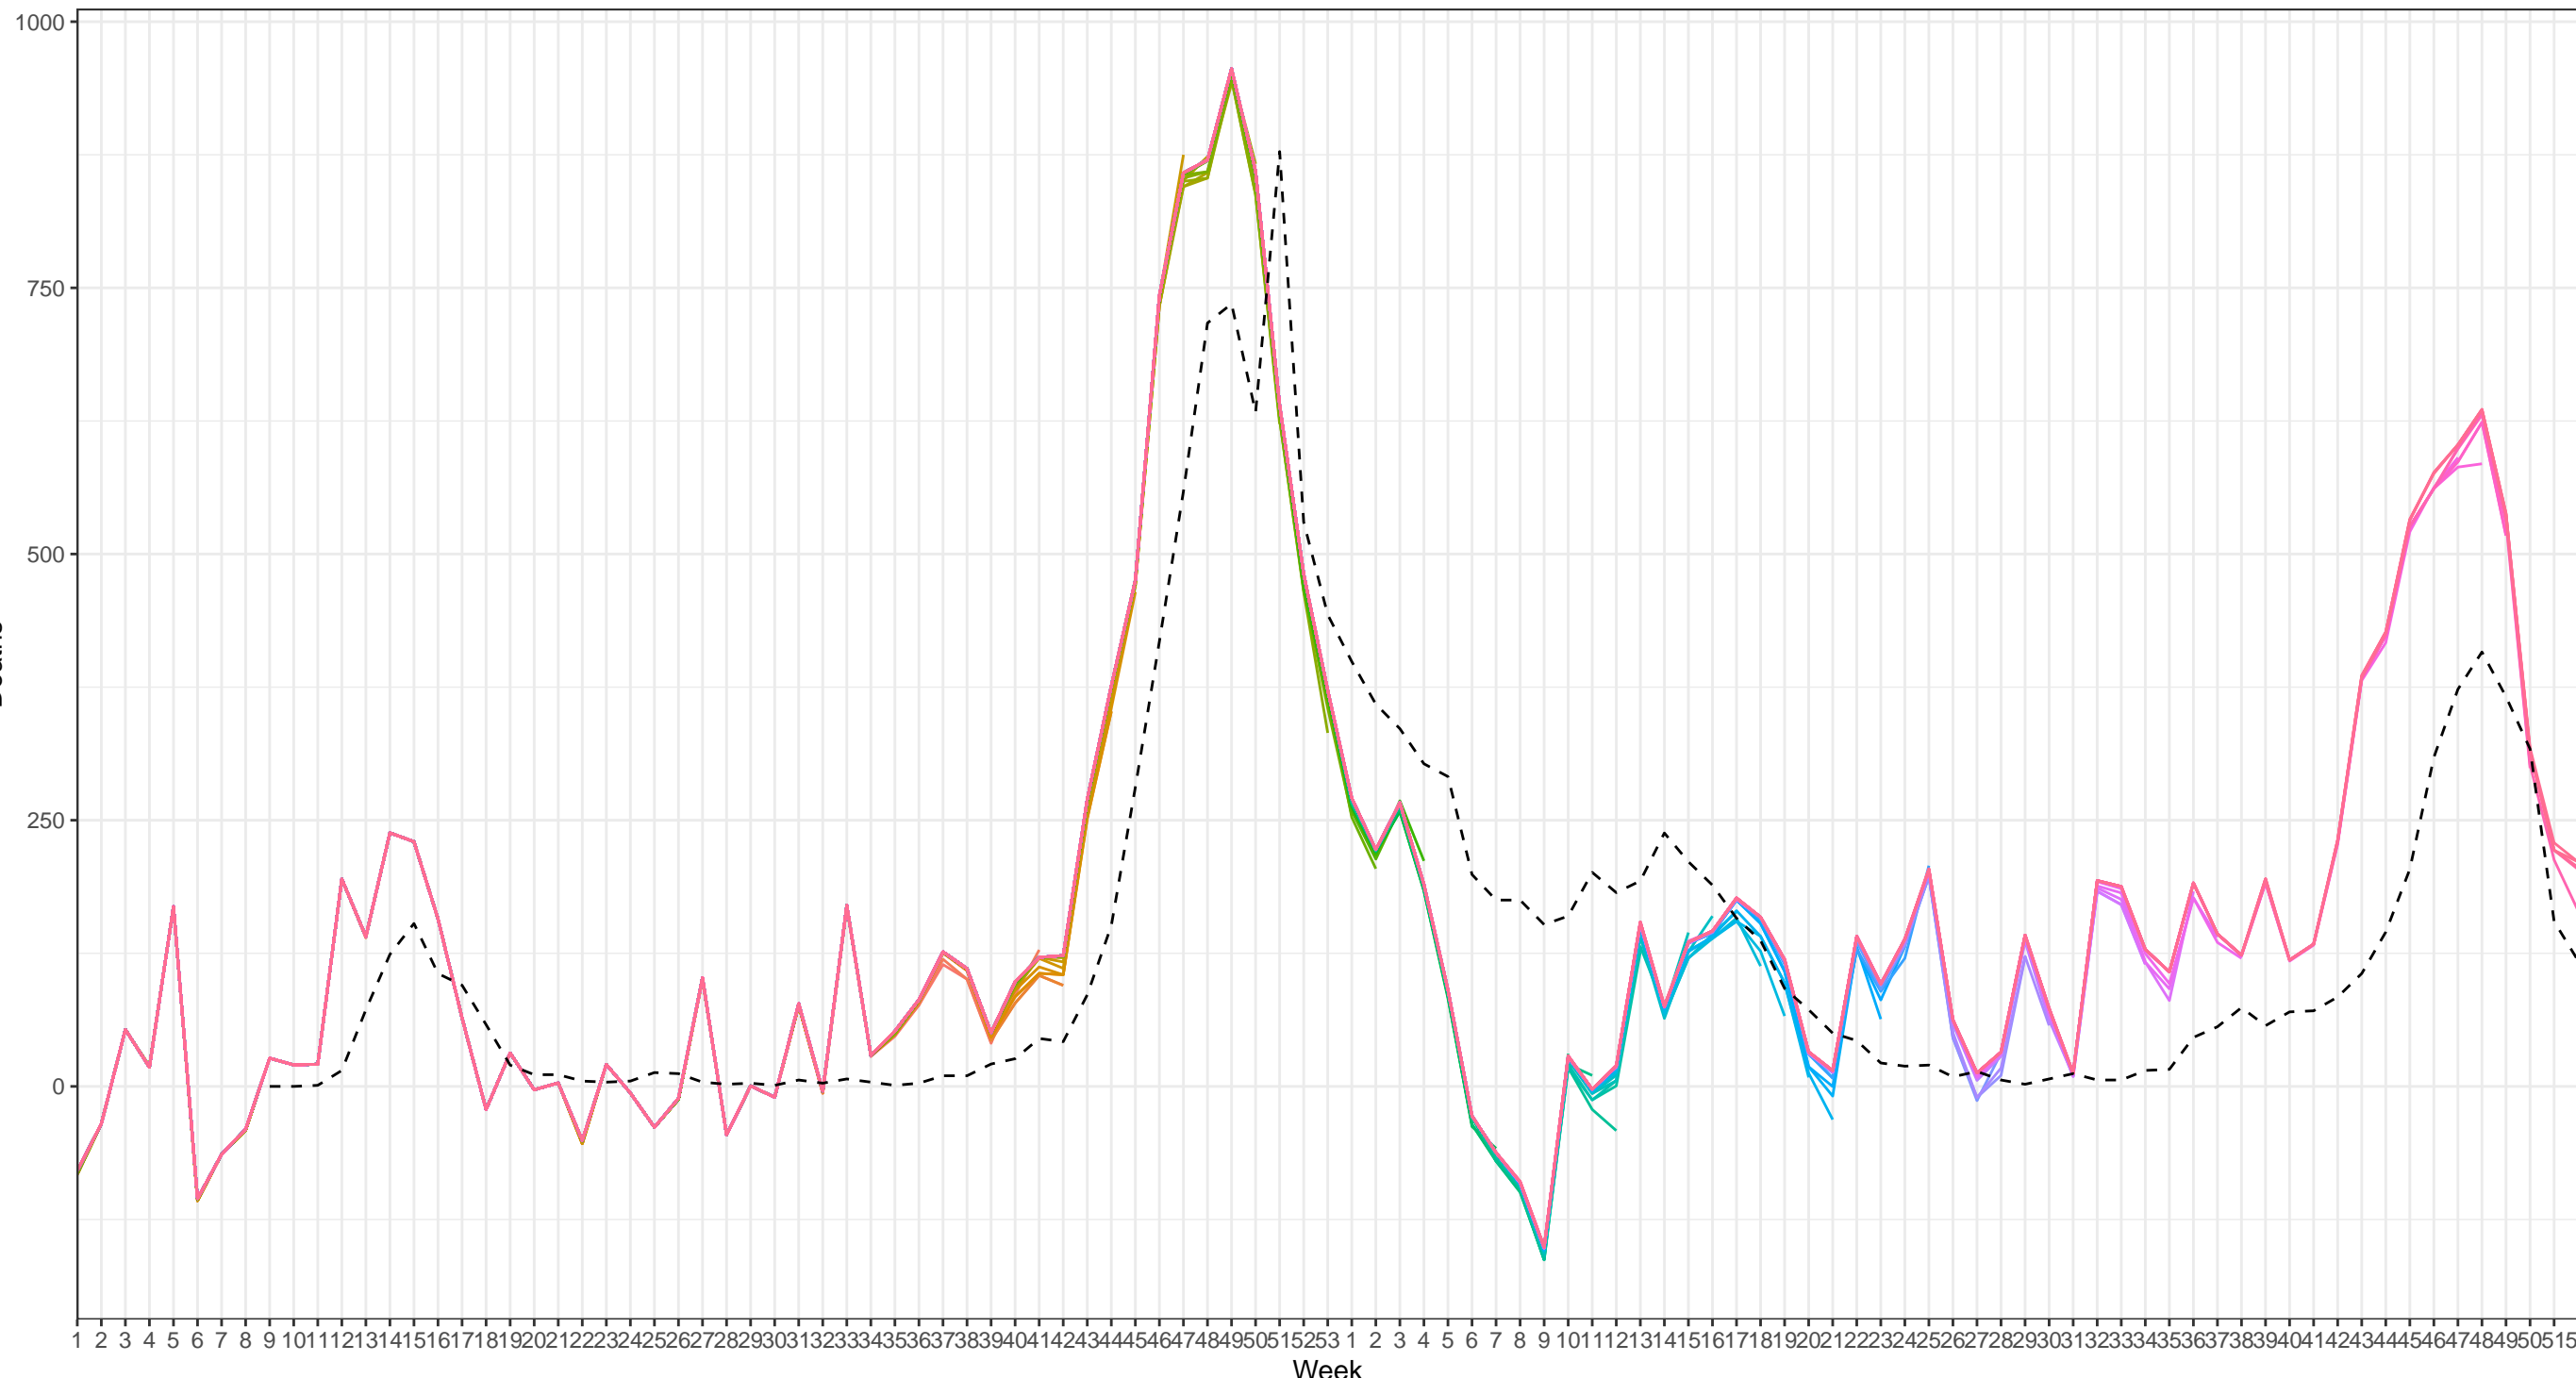

**Download date**

|            |            |            |
|------------|------------|------------|
| 2020-10-15 | 2021-02-26 | 2021-07-19 |
| 2020-10-22 | 2021-03-05 | 2021-08-03 |
| 2020-10-31 | 2021-03-12 | 2021-08-11 |
| 2020-11-05 | 2021-03-19 | 2021-08-17 |
| 2020-11-13 | 2021-03-25 | 2021-08-31 |
| 2020-11-15 | 2021-04-01 | 2021-09-10 |
| 2020-11-19 | 2021-04-09 | 2021-09-19 |
| 2020-11-27 | 2021-04-16 | 2021-09-23 |
| 2020-12-03 | 2021-04-24 | 2021-10-05 |
| 2020-12-10 | 2021-05-09 | 2021-10-11 |
| 2020-12-17 | 2021-05-14 | 2021-12-13 |
| 2020-12-22 | 2021-05-21 | 2021-12-22 |
| 2020-12-31 | 2021-05-28 | 2022-01-03 |
| 2021-01-08 | 2021-06-04 | 2022-01-06 |
| 2021-01-15 | 2021-06-11 | 2022-01-10 |
| 2021-01-22 | 2021-06-18 | 2022-01-17 |
| 2021-01-29 | 2021-06-25 | 2022-01-24 |
| 2021-02-05 | 2021-07-09 | 2022-01-31 |
| 2021-02-12 | 2021-07-16 | 2022-02-07 |
| 2021-02-19 |            | 2022-02-14 |

**Mortality type**

- Estimated excess mortality
- - Reported COVID-19 mortality

# Belgium

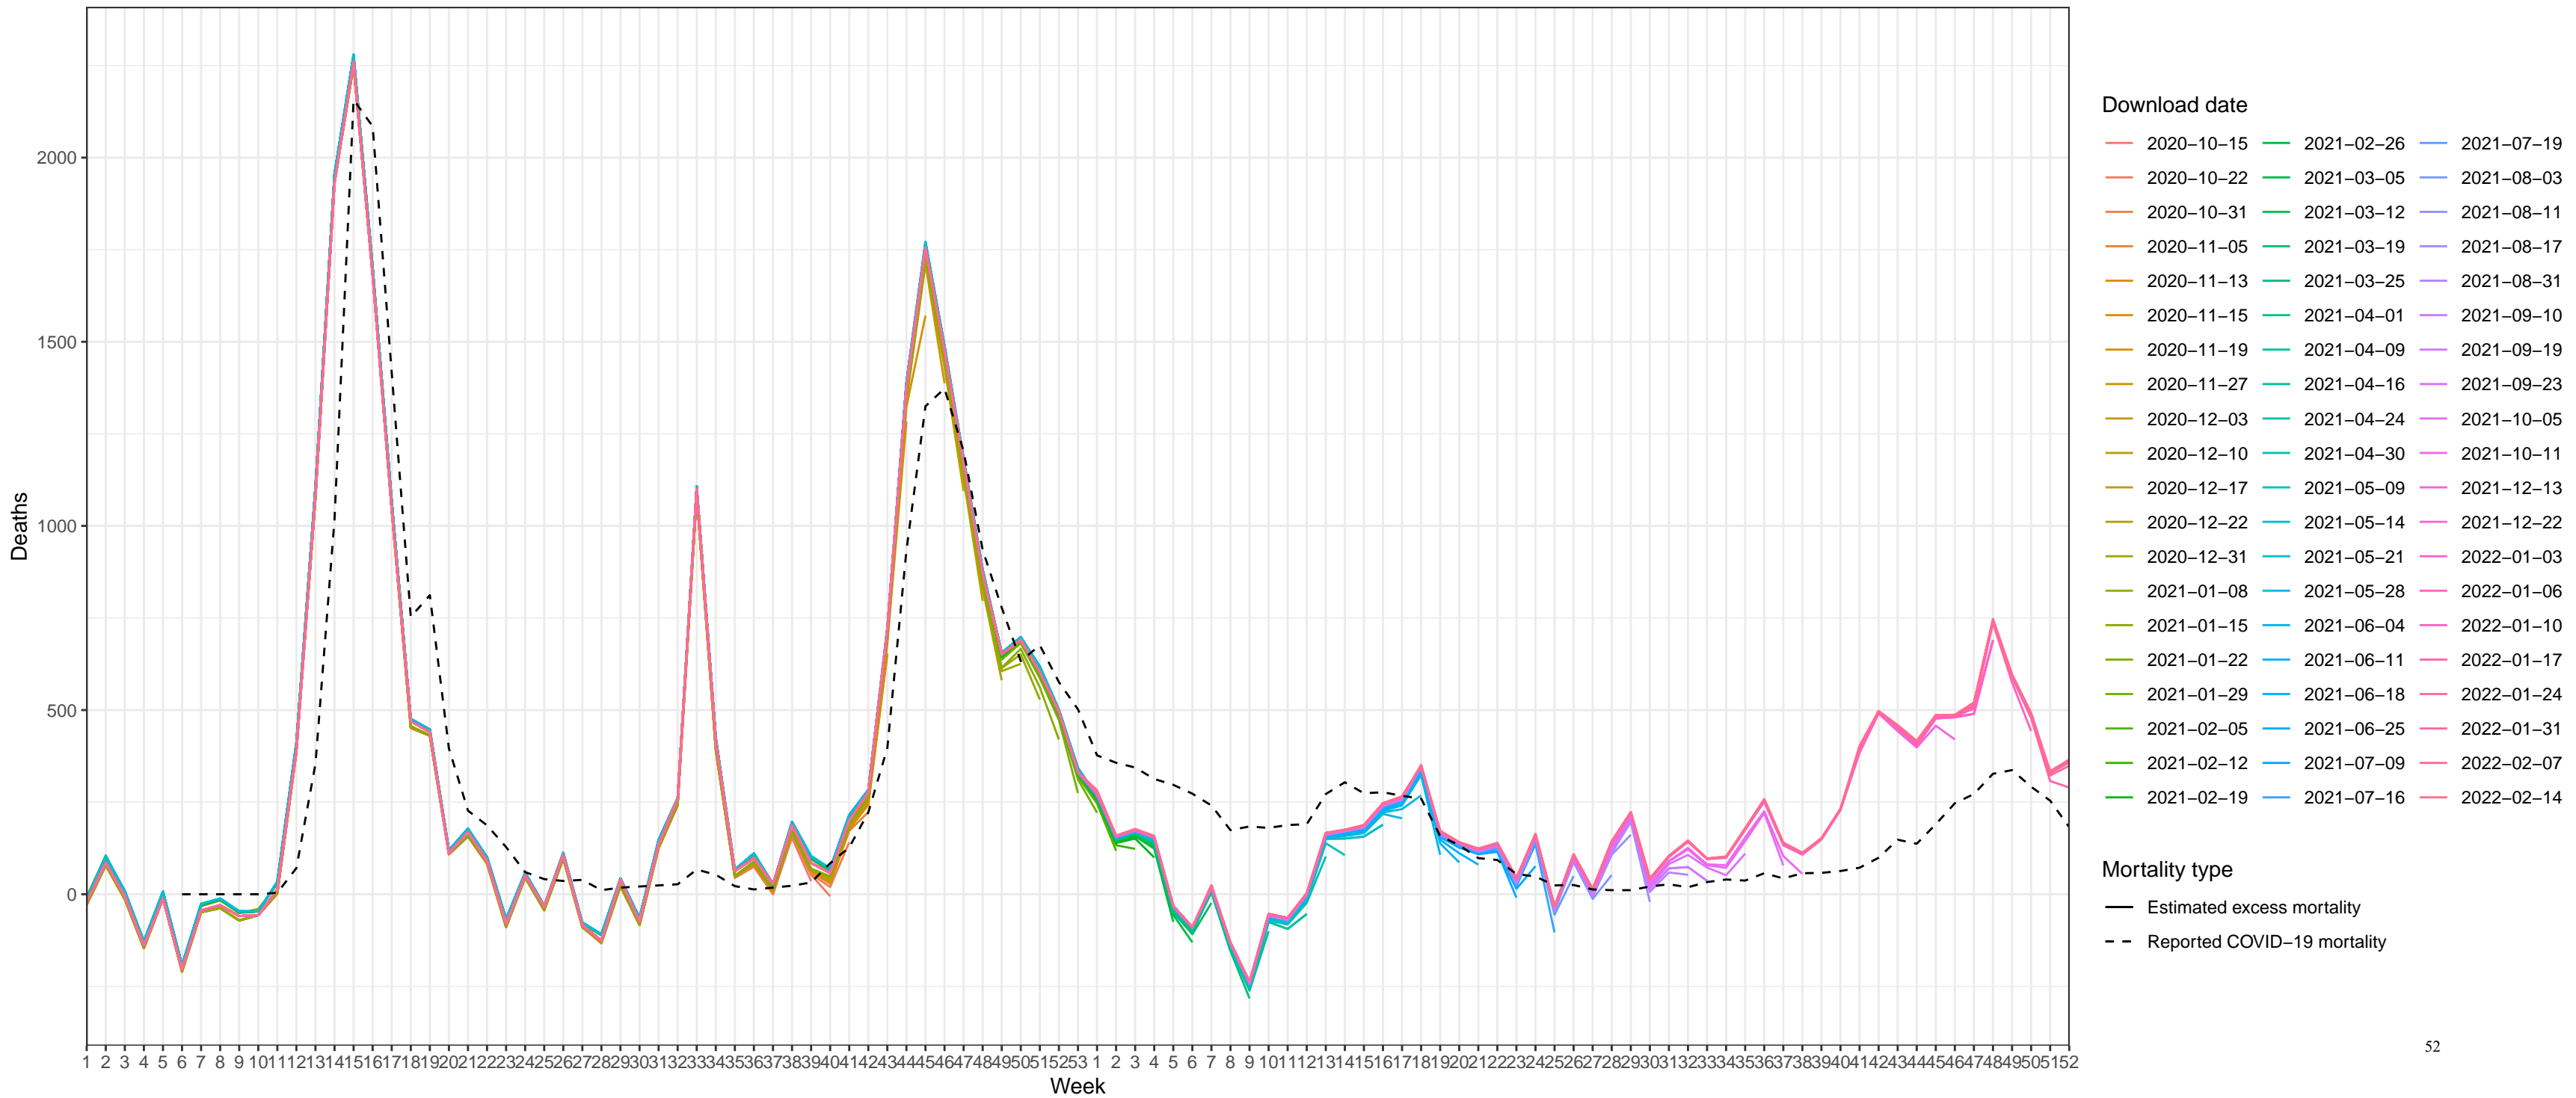

# Bulgaria

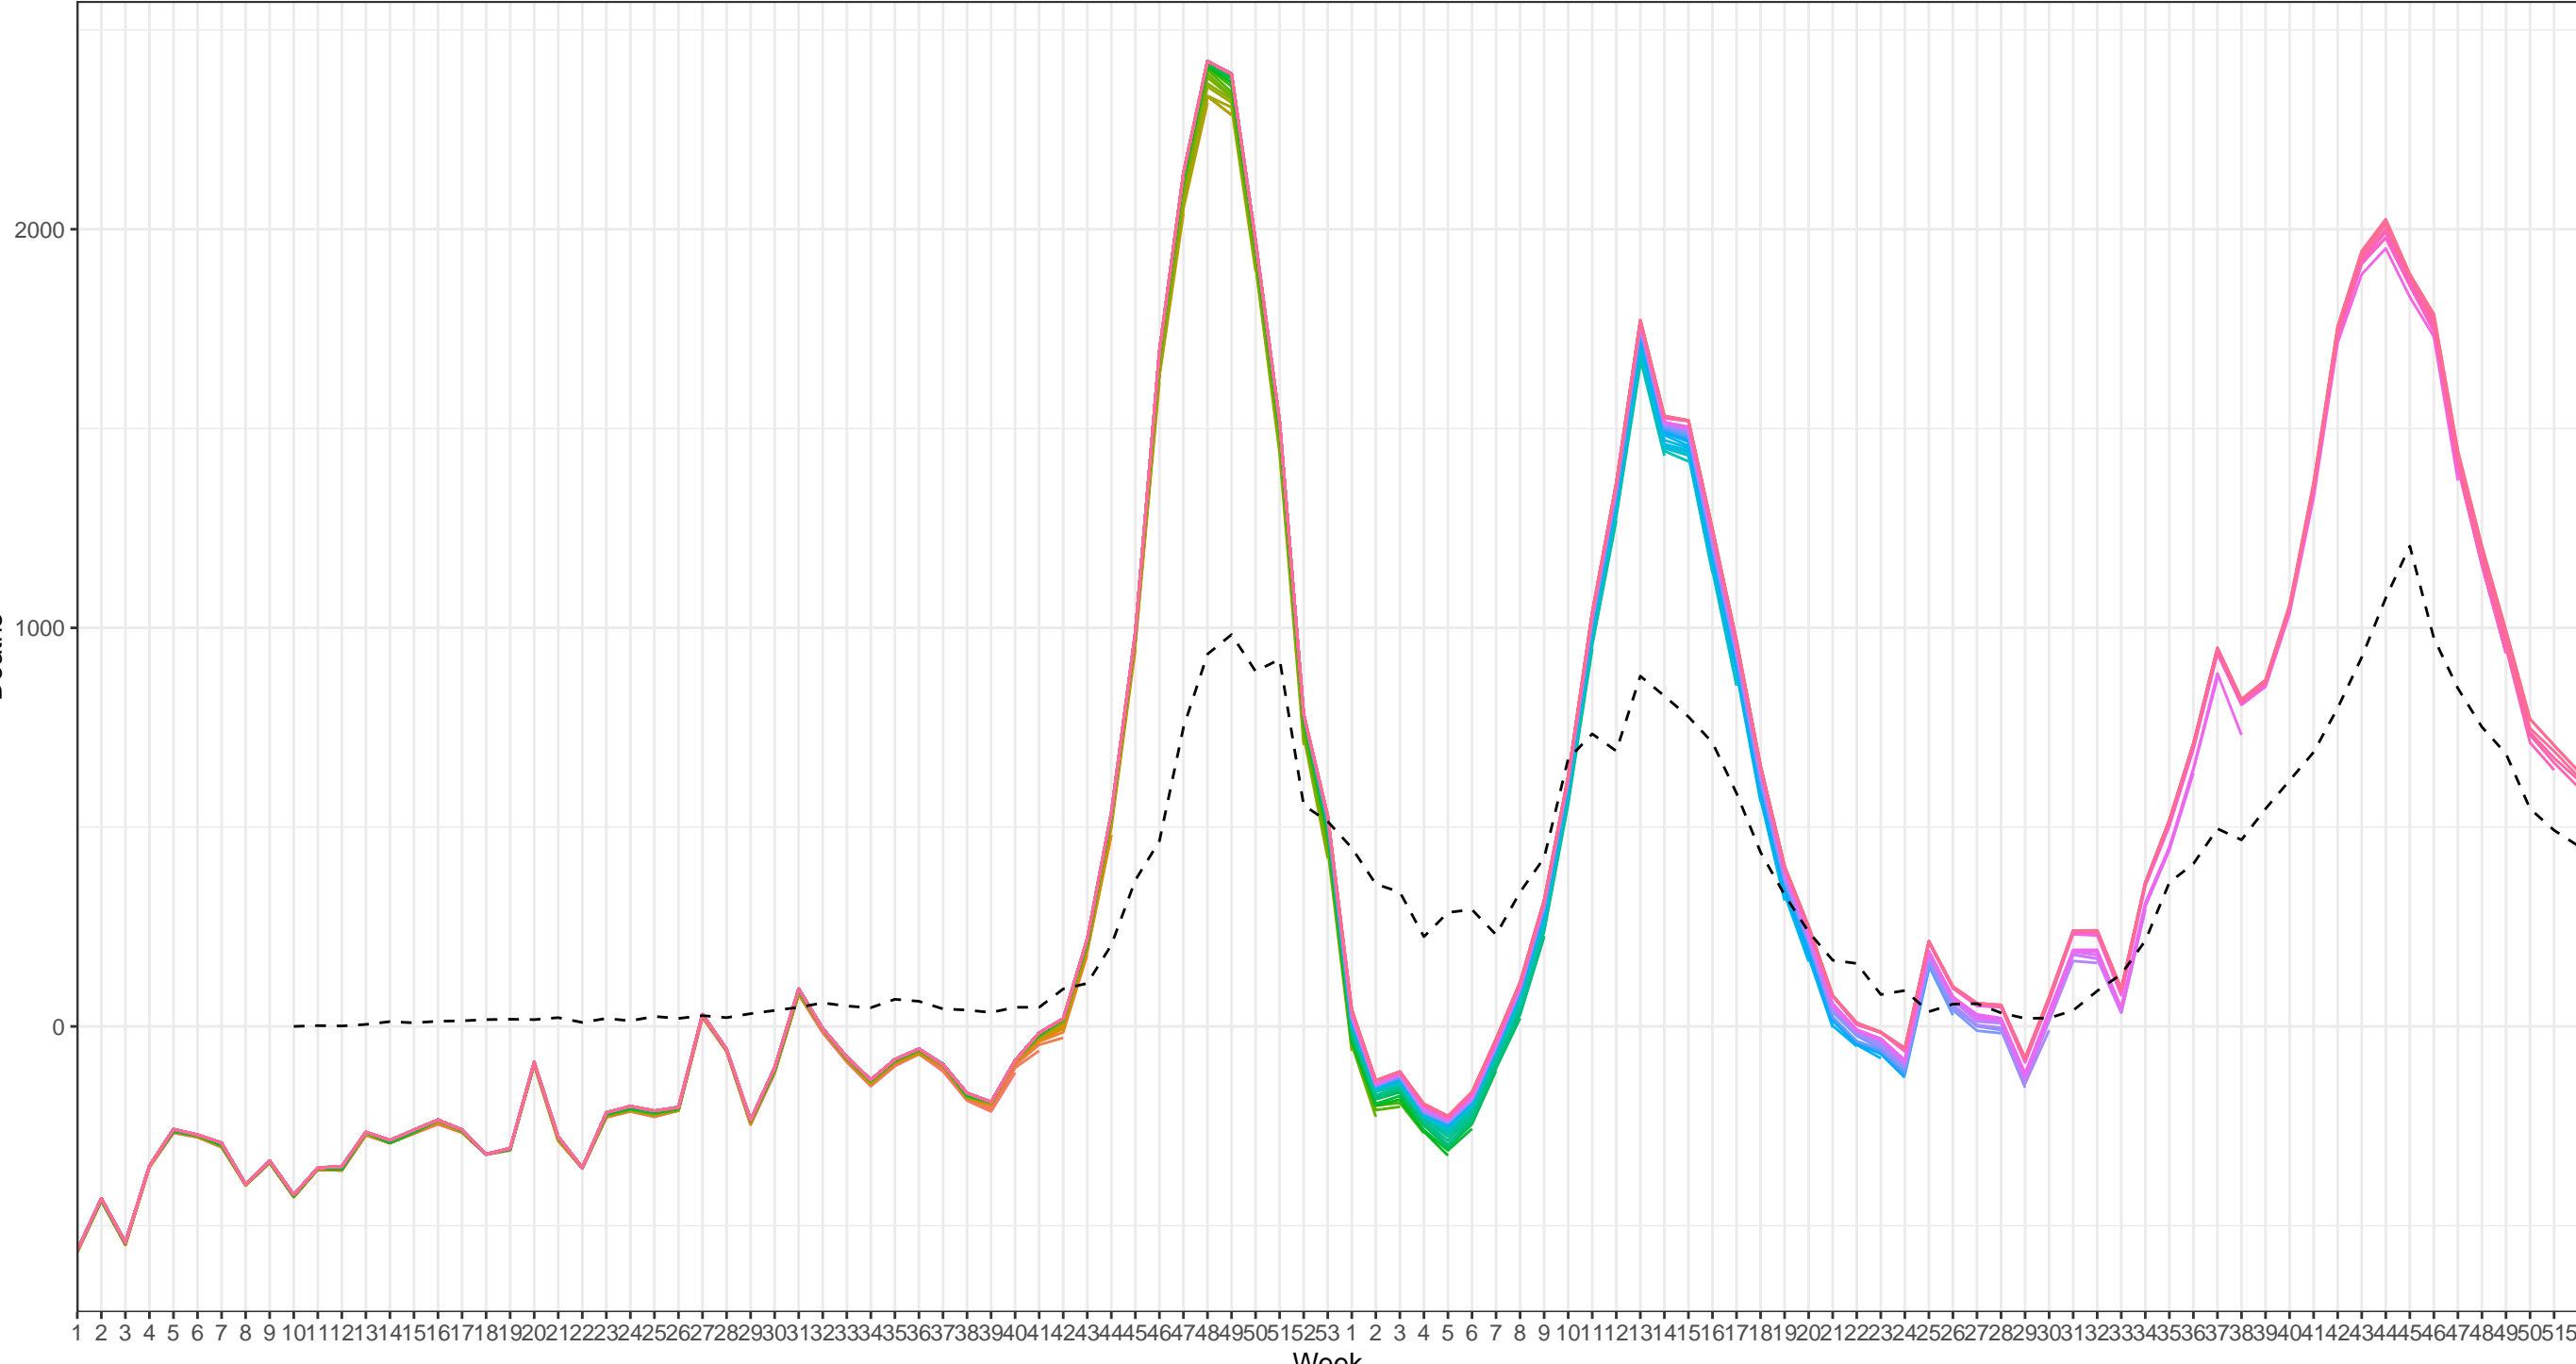

**Download date**

|            |            |            |
|------------|------------|------------|
| 2020-10-15 | 2021-02-26 | 2021-07-19 |
| 2020-10-22 | 2021-03-05 | 2021-08-03 |
| 2020-10-31 | 2021-03-12 | 2021-08-11 |
| 2020-11-05 | 2021-03-19 | 2021-08-17 |
| 2020-11-13 | 2021-03-25 | 2021-08-31 |
| 2020-11-15 | 2021-04-01 | 2021-09-10 |
| 2020-11-19 | 2021-04-09 | 2021-09-19 |
| 2020-11-27 | 2021-04-16 | 2021-09-23 |
| 2020-12-03 | 2021-04-24 | 2021-10-05 |
| 2020-12-10 | 2021-05-09 | 2021-10-11 |
| 2020-12-17 | 2021-05-14 | 2021-12-13 |
| 2020-12-22 | 2021-05-21 | 2021-12-22 |
| 2020-12-31 | 2021-05-28 | 2022-01-03 |
| 2021-01-08 | 2021-06-04 | 2022-01-06 |
| 2021-01-15 | 2021-06-11 | 2022-01-10 |
| 2021-01-22 | 2021-06-18 | 2022-01-17 |
| 2021-01-29 | 2021-06-25 | 2022-01-24 |
| 2021-02-05 | 2021-07-09 | 2022-01-31 |
| 2021-02-12 | 2021-07-16 | 2022-02-07 |
| 2021-02-19 |            | 2022-02-14 |

**Mortality type**

- Estimated excess mortality
- - Reported COVID-19 mortality

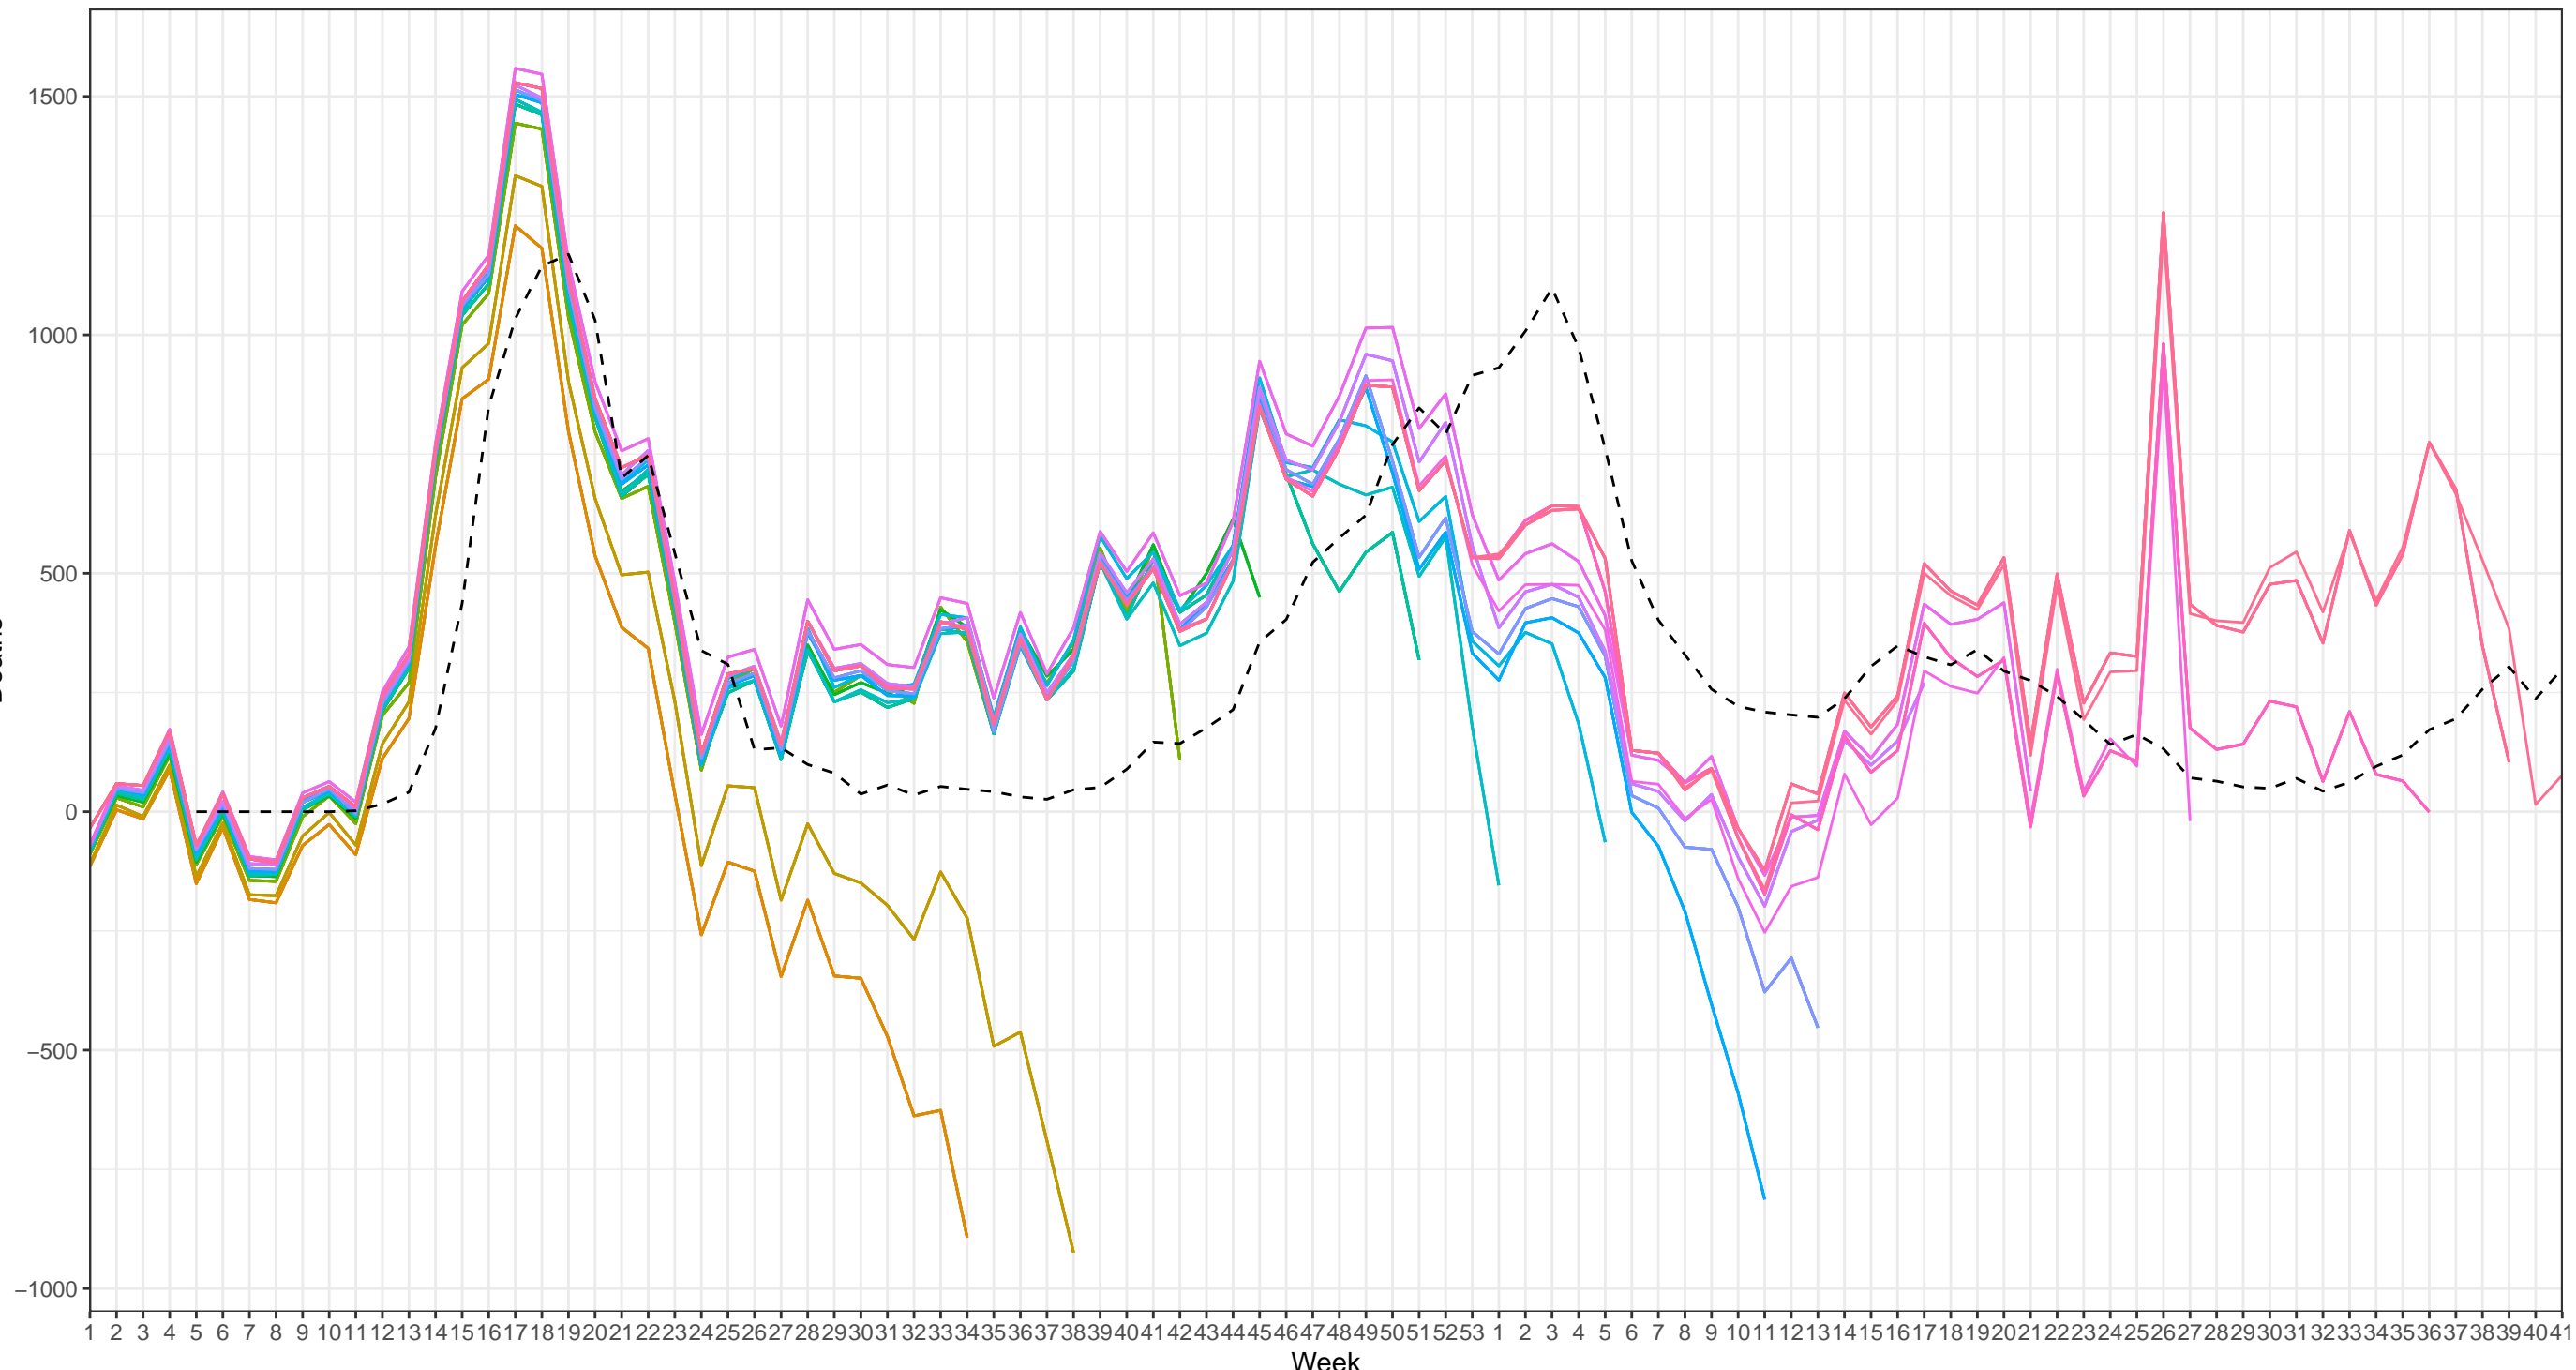

**Download date**

|            |            |            |
|------------|------------|------------|
| 2020-10-31 | 2021-03-12 | 2021-08-11 |
| 2020-11-05 | 2021-03-19 | 2021-08-17 |
| 2020-11-13 | 2021-03-25 | 2021-08-31 |
| 2020-11-15 | 2021-04-01 | 2021-09-10 |
| 2020-11-19 | 2021-04-09 | 2021-09-19 |
| 2020-11-27 | 2021-04-16 | 2021-09-23 |
| 2020-12-03 | 2021-04-24 | 2021-10-05 |
| 2020-12-10 | 2021-04-30 | 2021-10-11 |
| 2020-12-17 | 2021-05-09 | 2021-12-13 |
| 2020-12-22 | 2021-05-14 | 2021-12-22 |
| 2020-12-31 | 2021-05-21 | 2022-01-03 |
| 2021-01-08 | 2021-05-28 | 2022-01-06 |
| 2021-01-15 | 2021-06-04 | 2022-01-10 |
| 2021-01-22 | 2021-06-11 | 2022-01-17 |
| 2021-01-29 | 2021-06-18 | 2022-01-24 |
| 2021-02-05 | 2021-06-25 | 2022-01-31 |
| 2021-02-12 | 2021-07-09 | 2022-02-07 |
| 2021-02-19 | 2021-07-16 | 2022-02-14 |
| 2021-02-26 | 2021-07-19 |            |
| 2021-03-05 | 2021-08-03 |            |

**Mortality type**

- Estimated excess mortality
- - Reported COVID-19 mortality

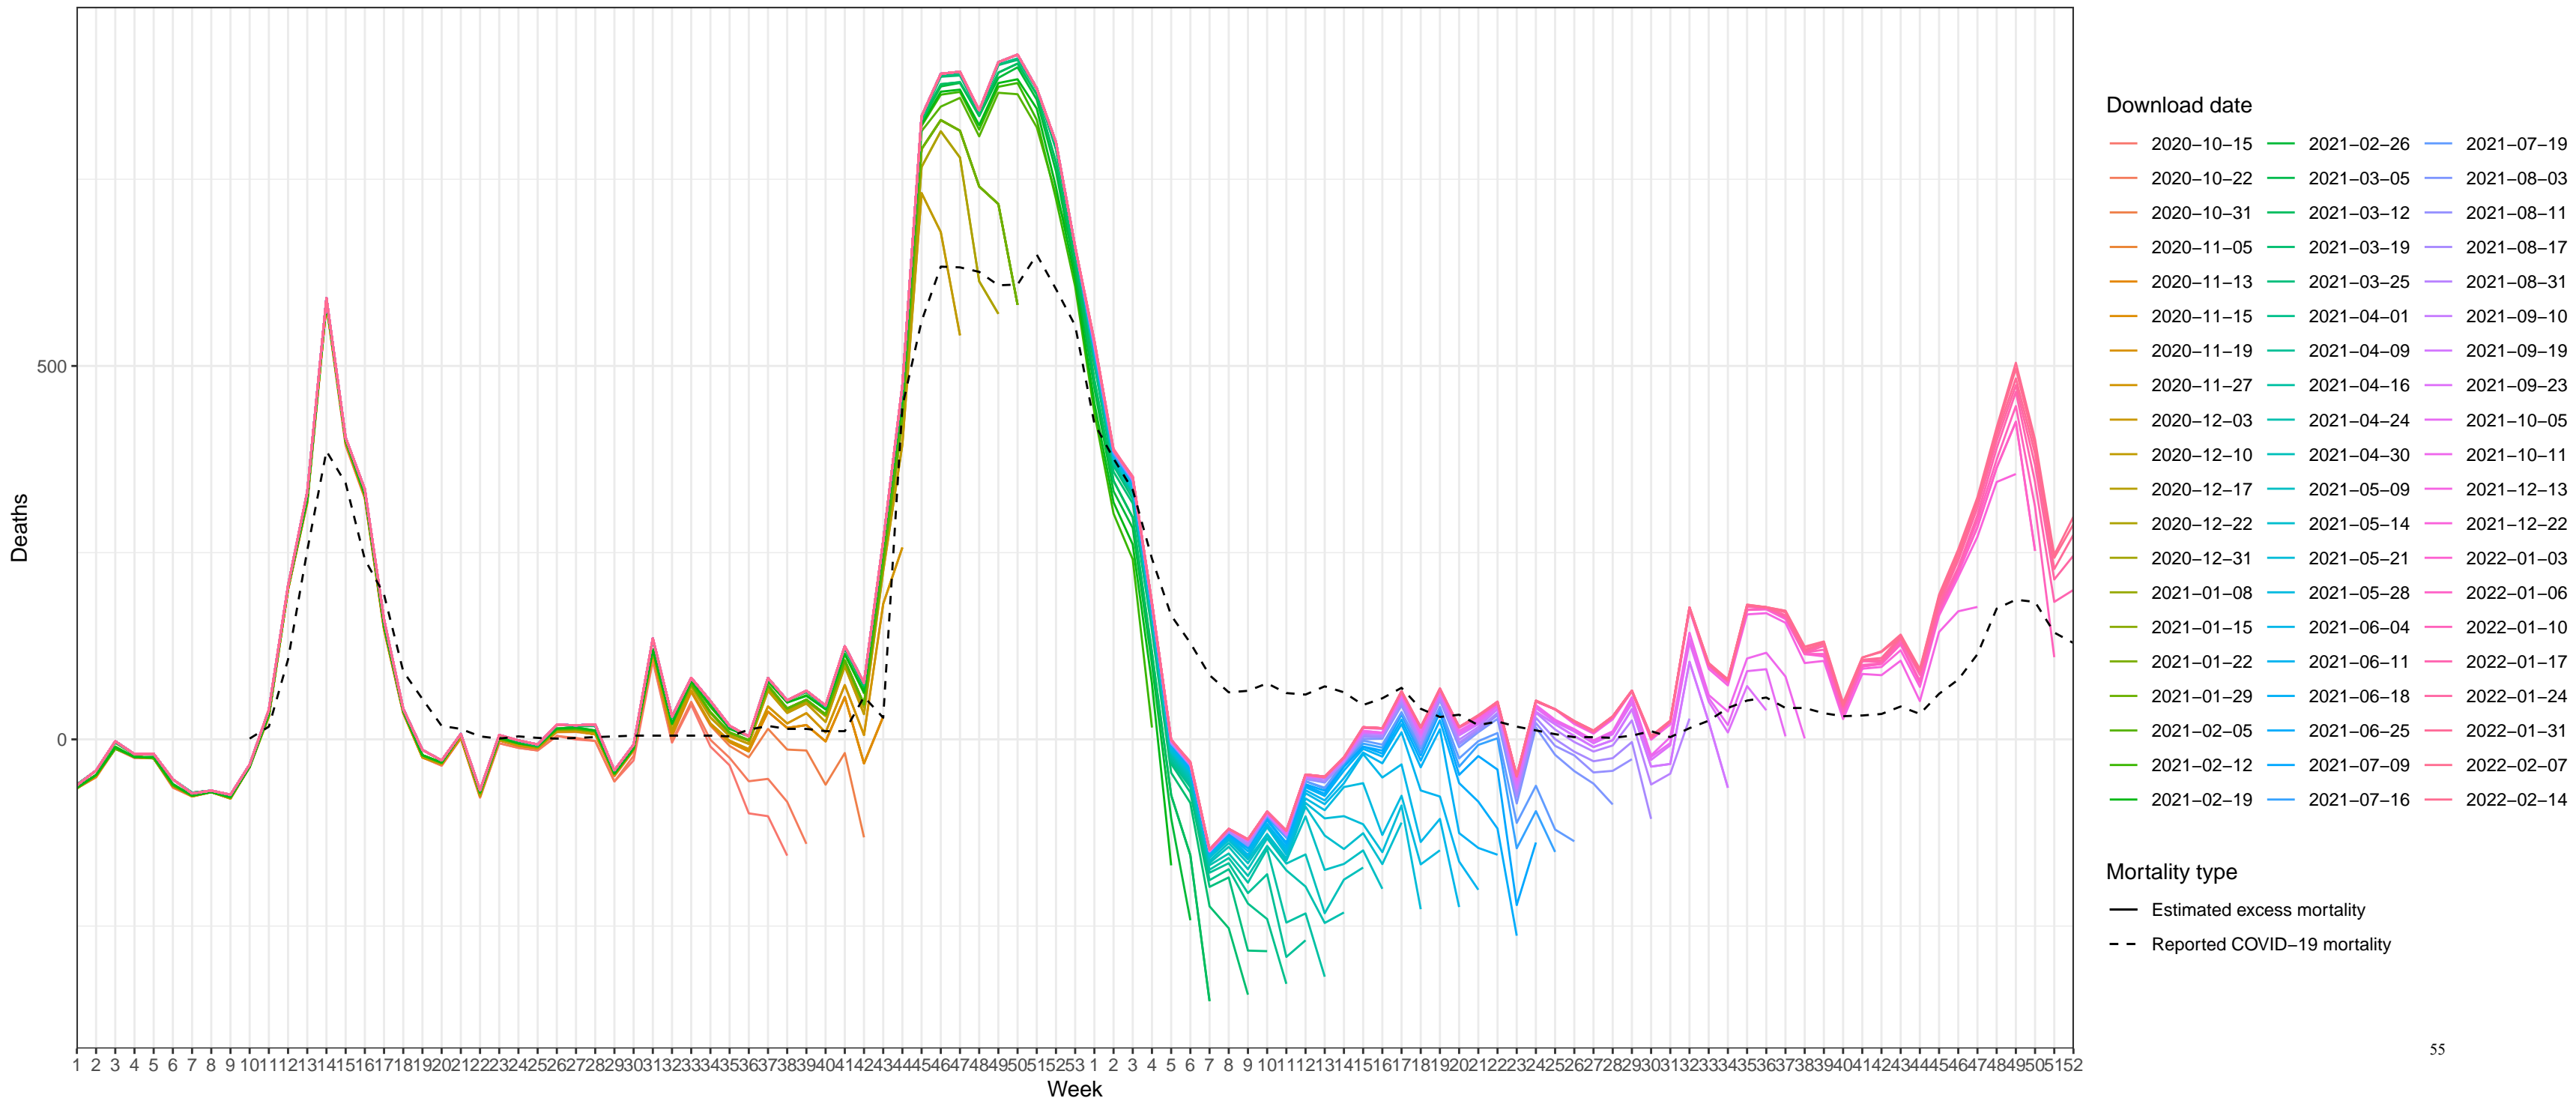



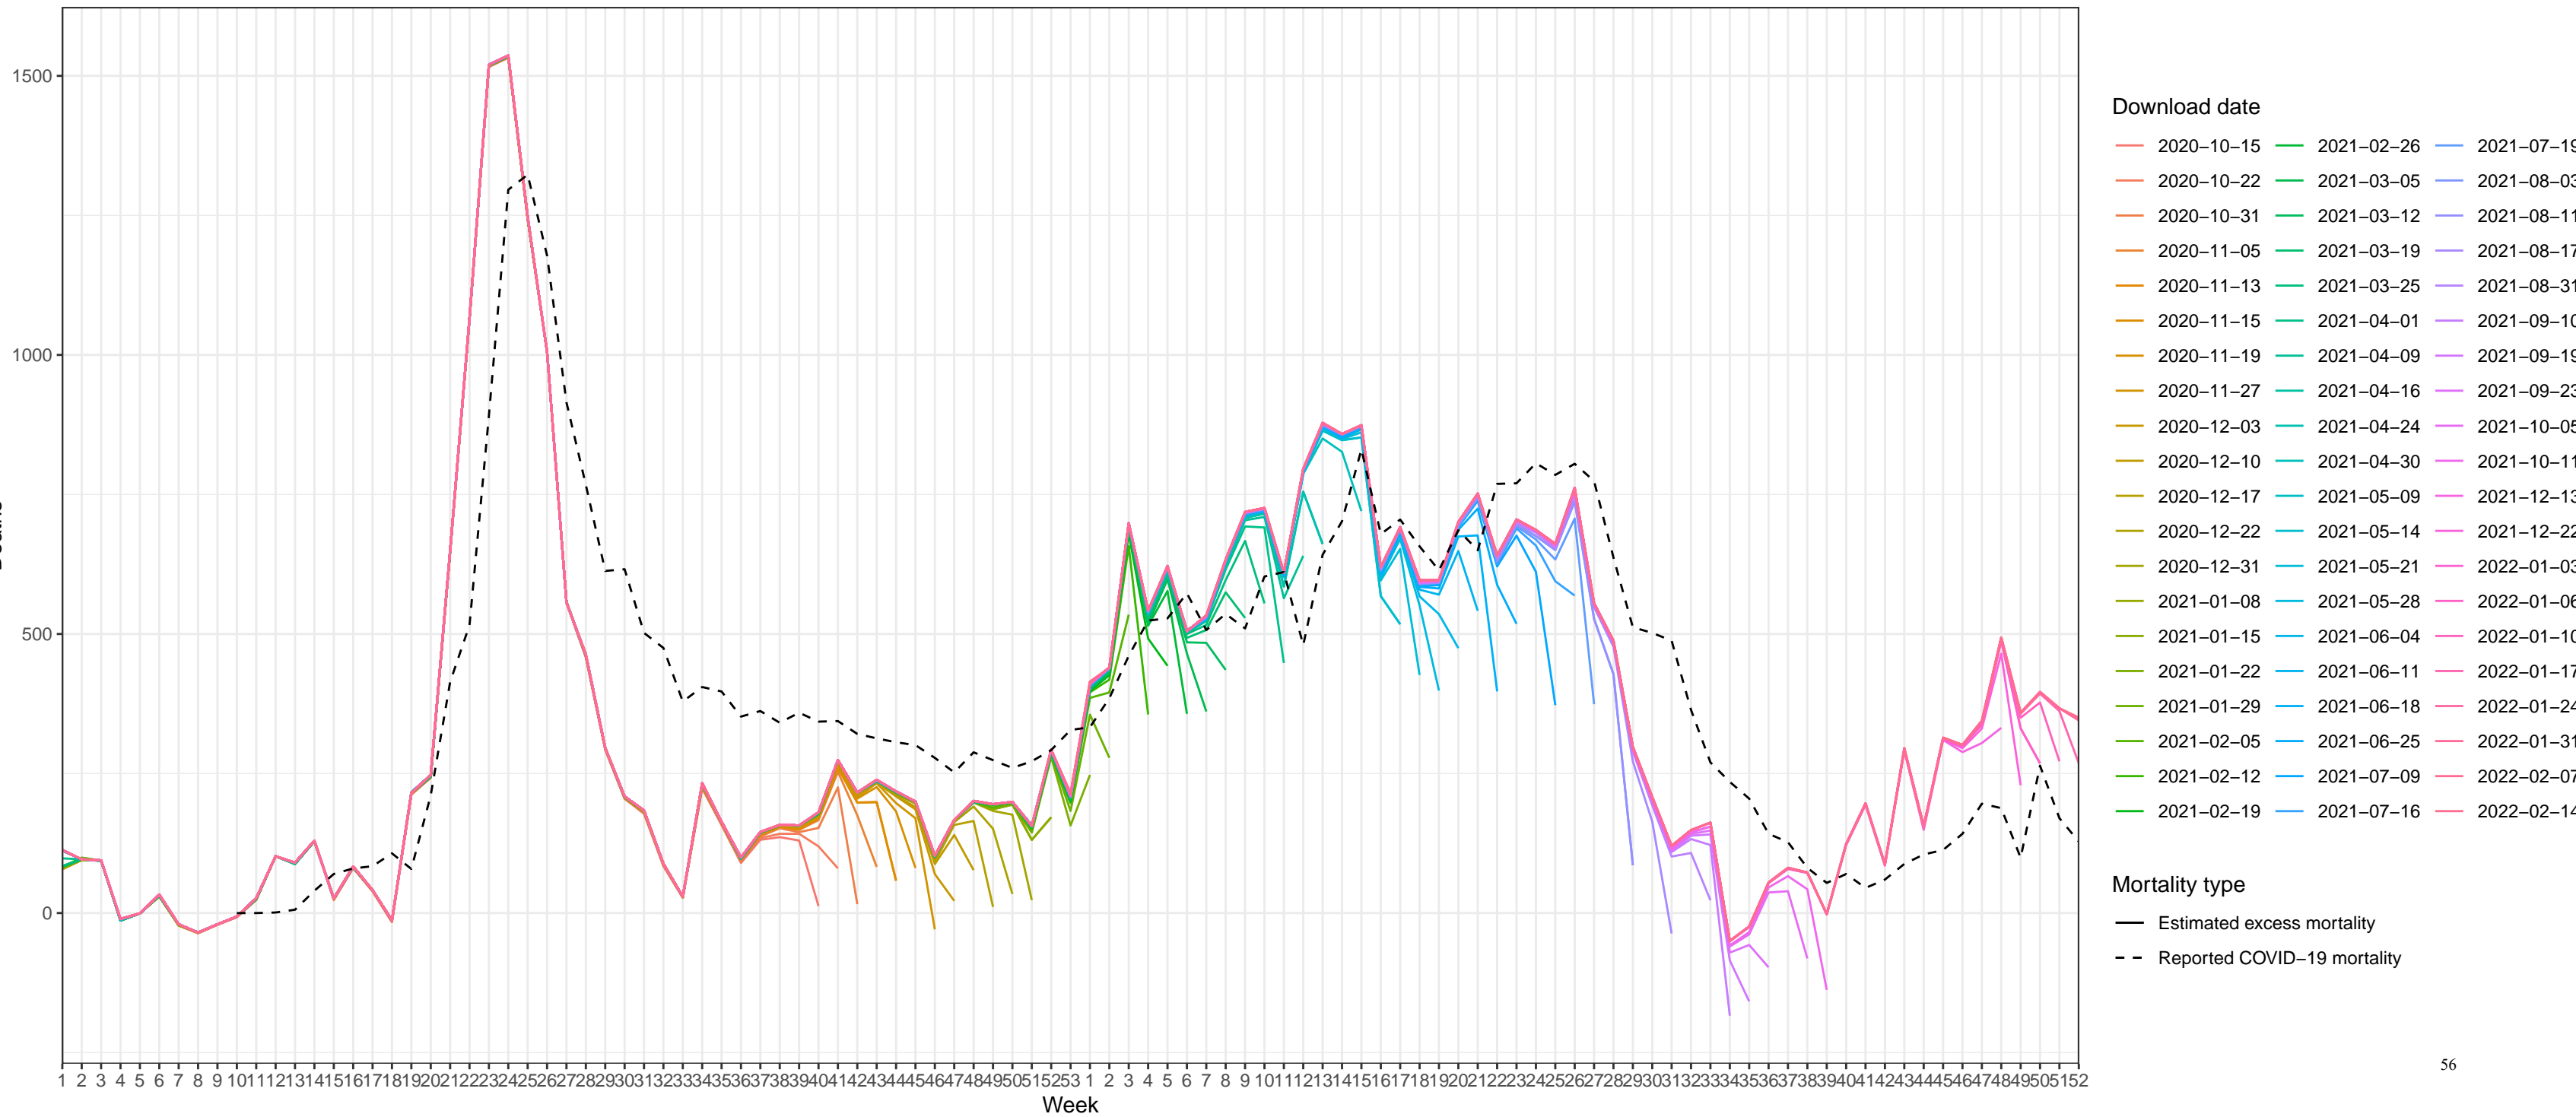

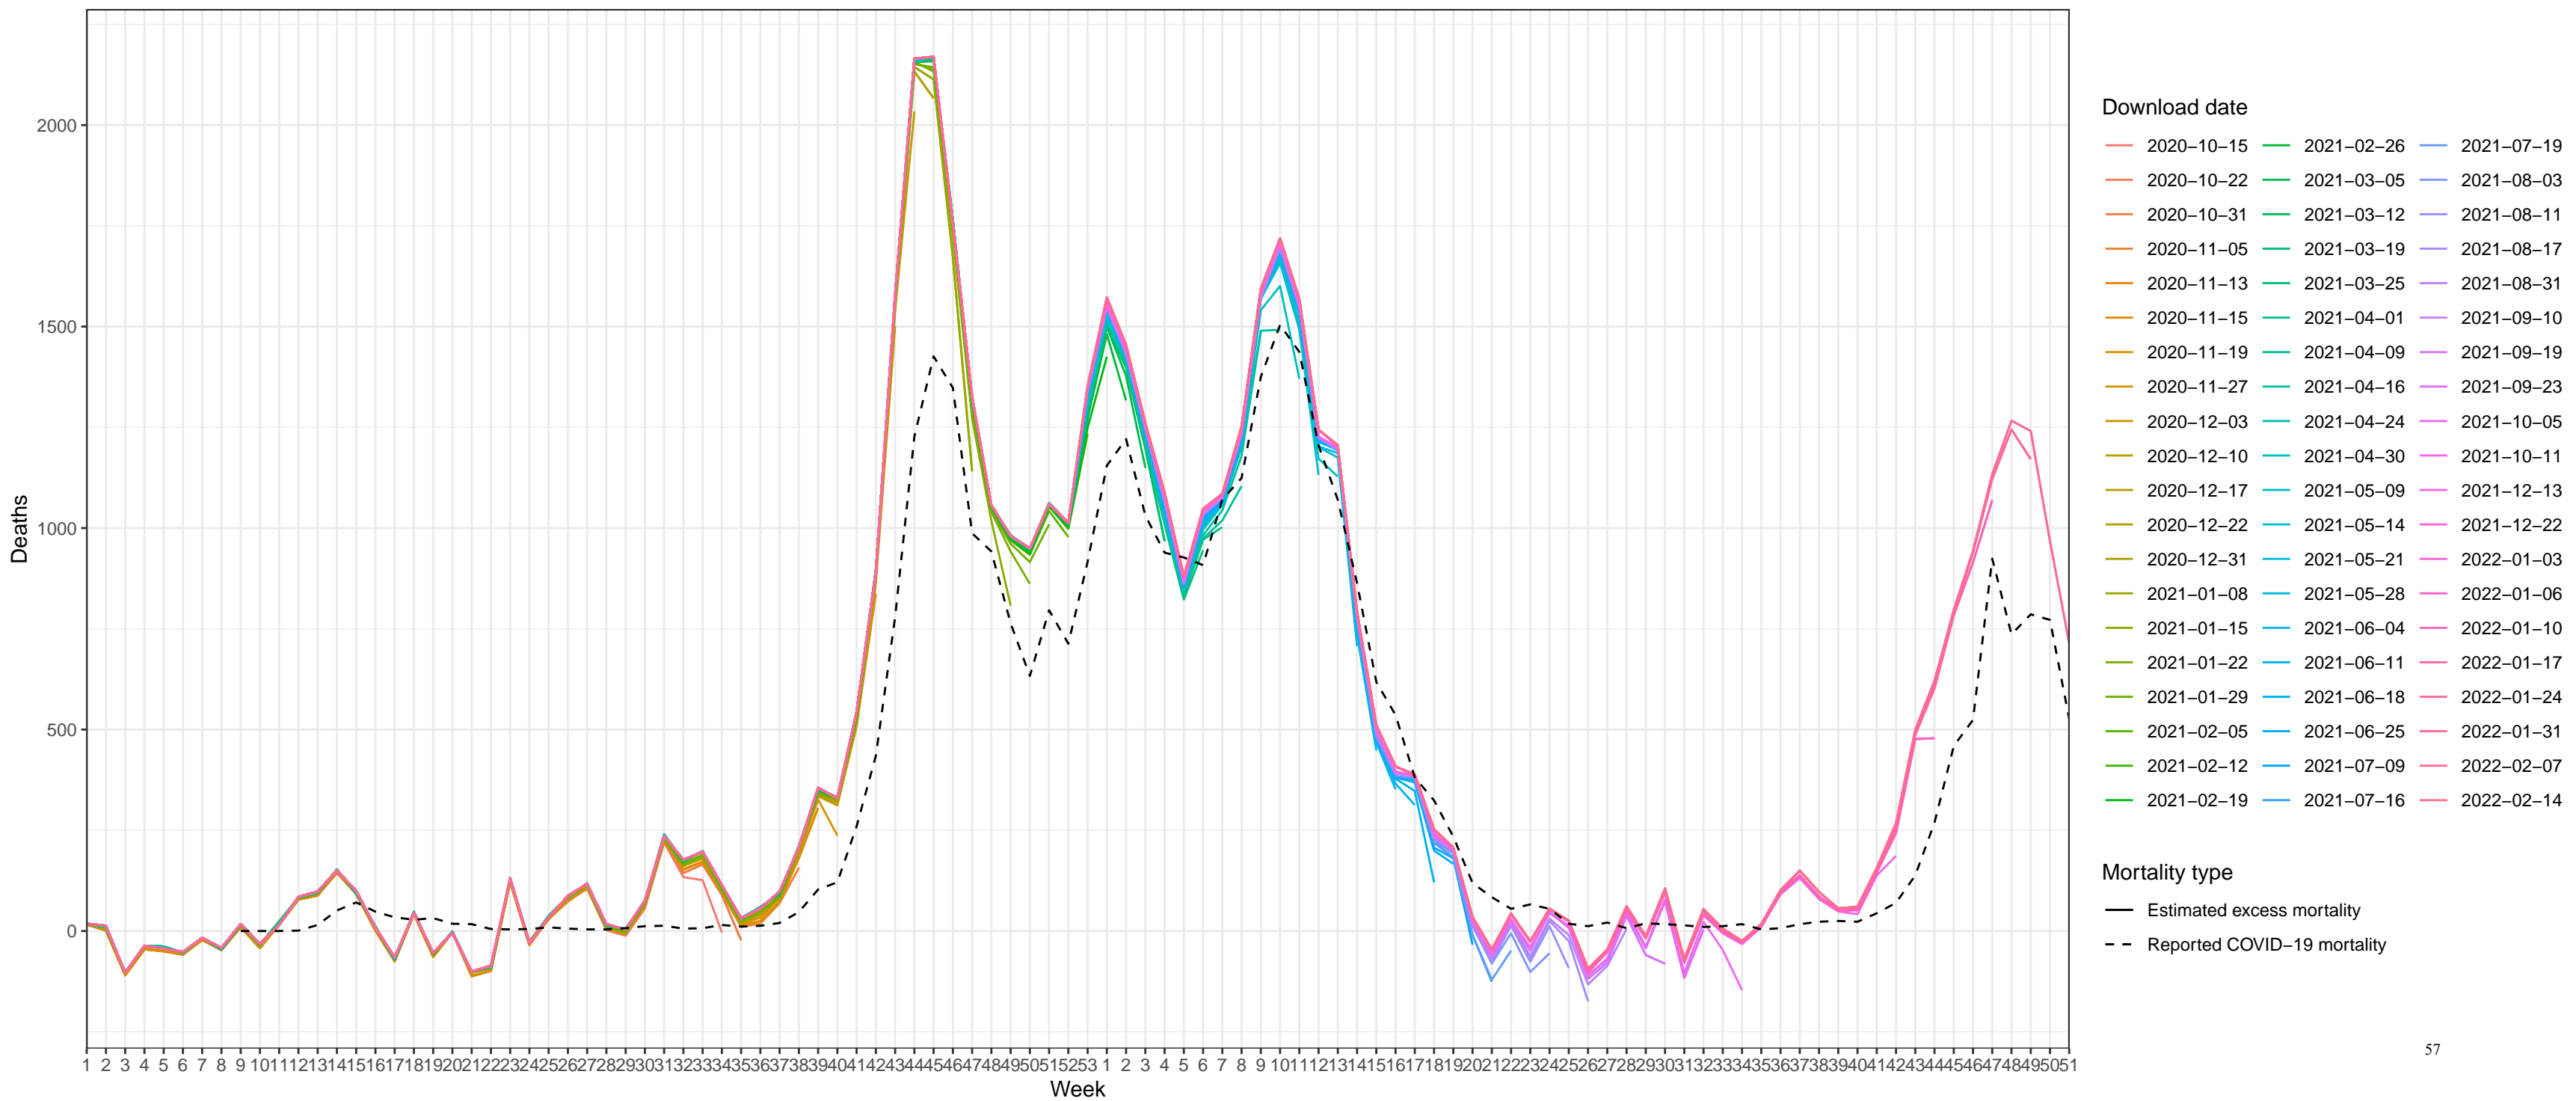

# Germany

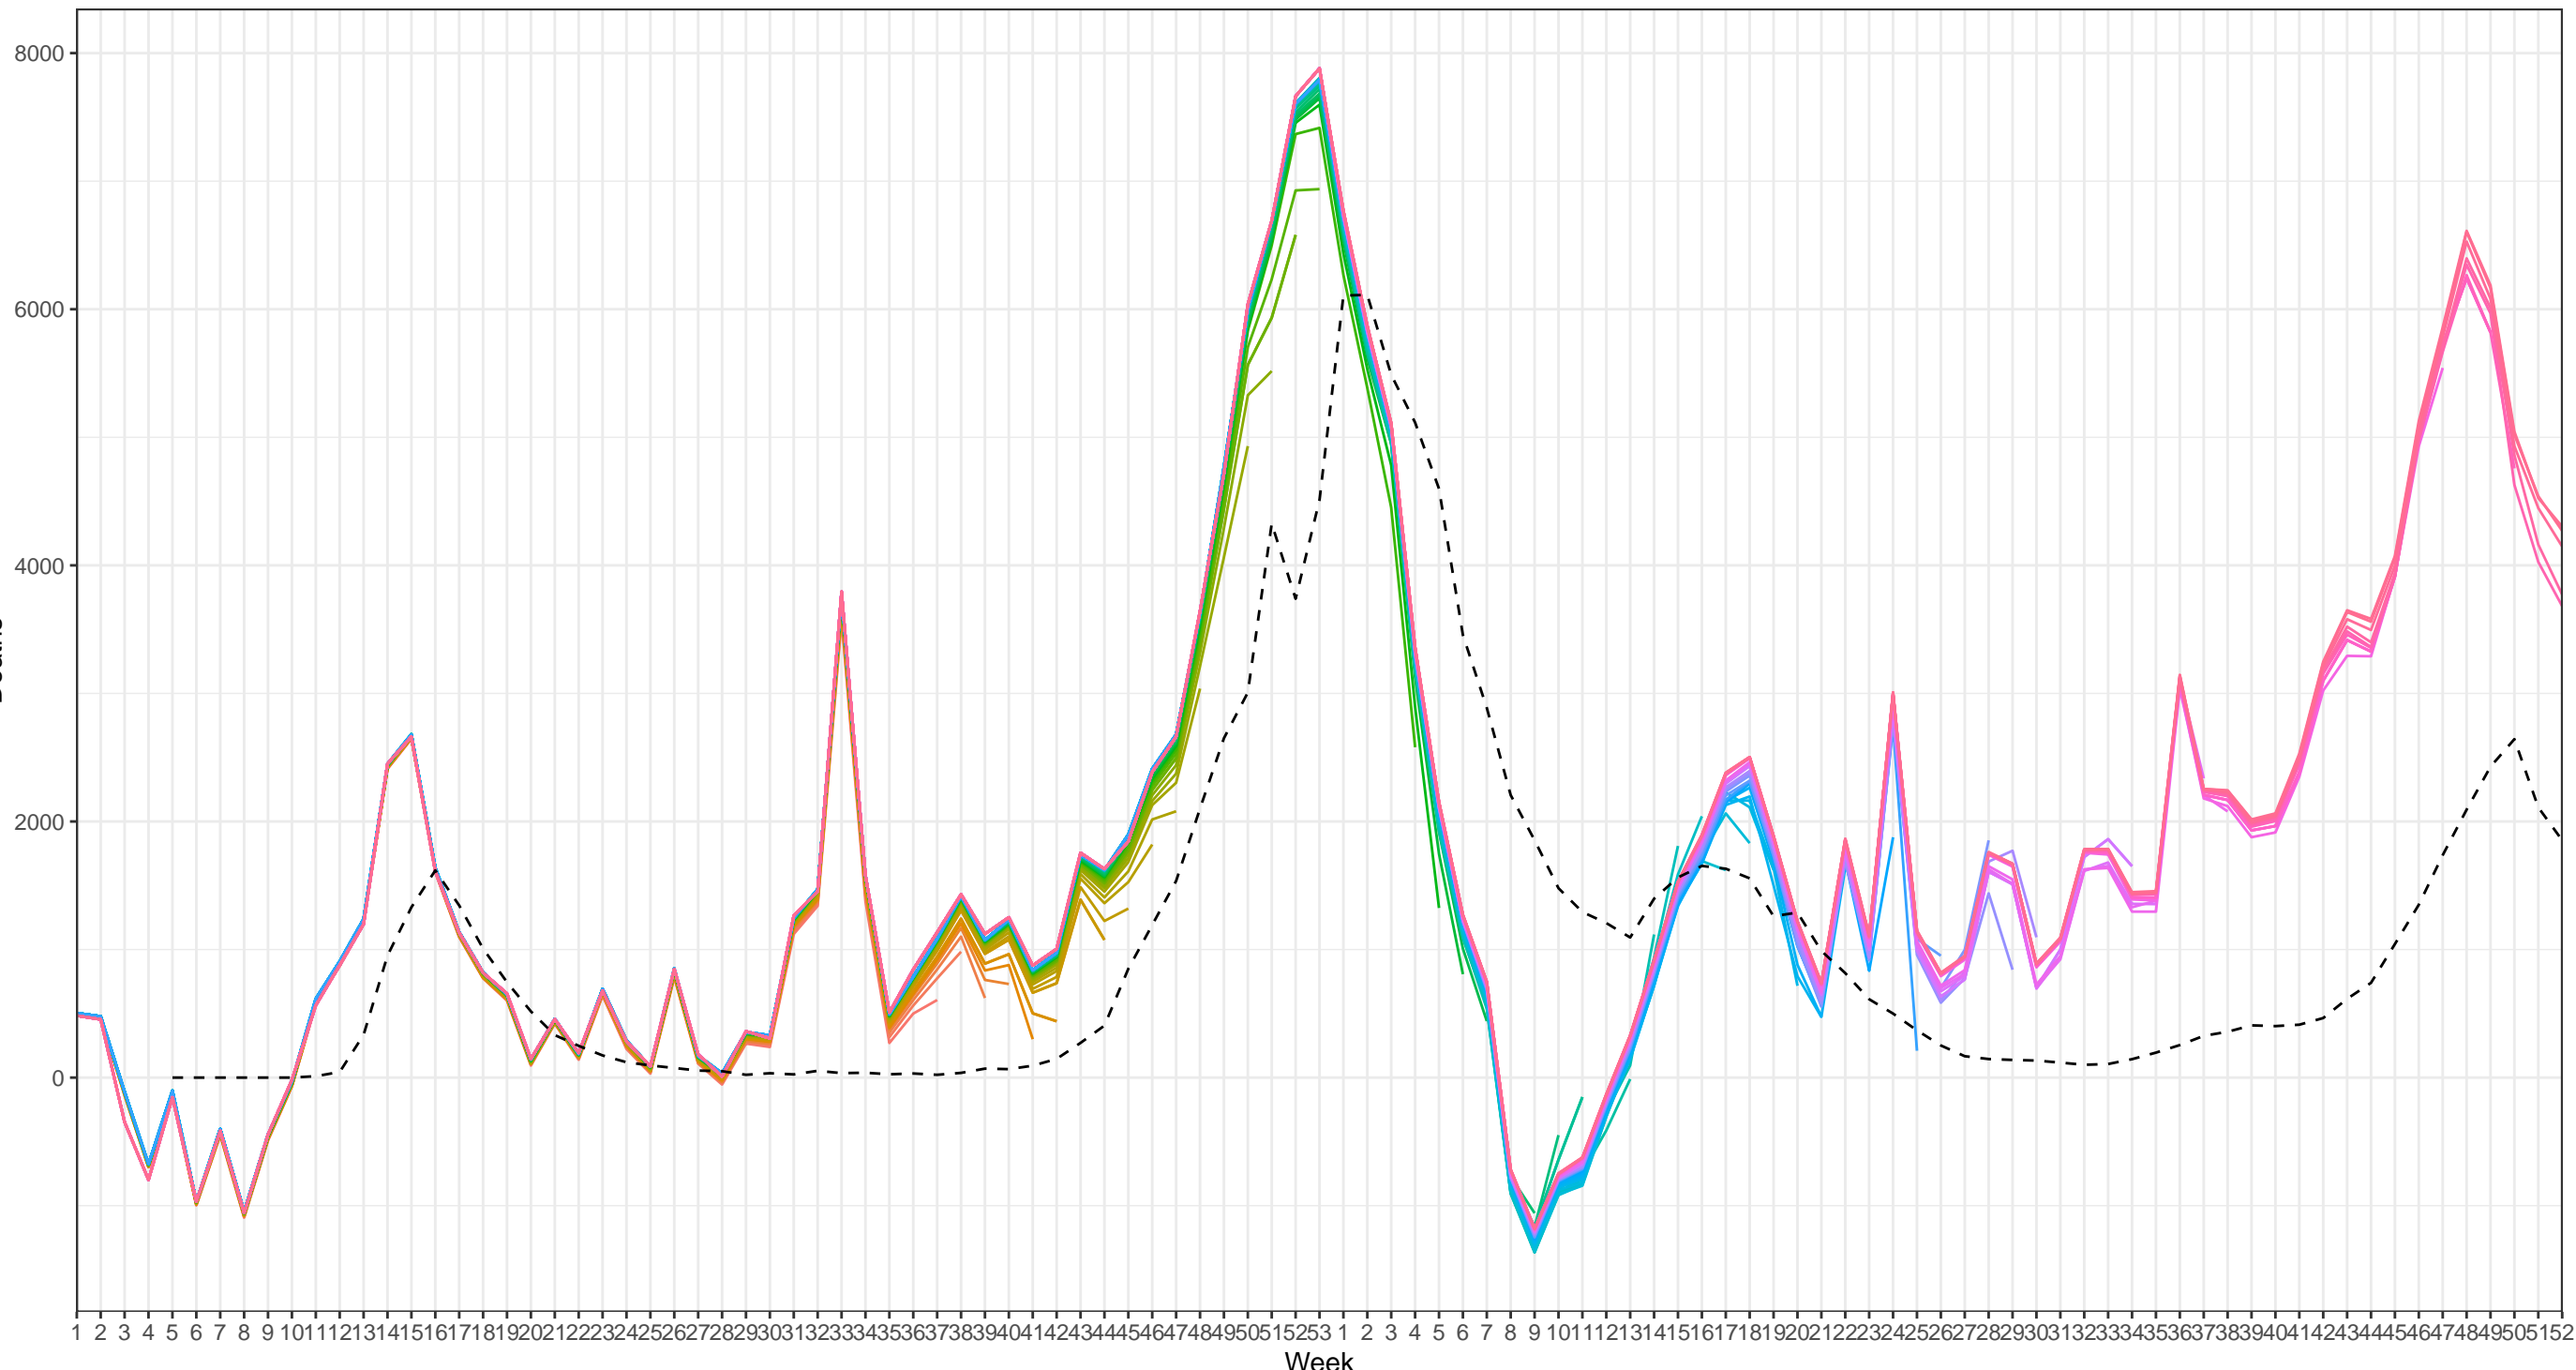

**Download date**

|            |            |            |
|------------|------------|------------|
| 2020-10-15 | 2021-02-26 | 2021-07-19 |
| 2020-10-22 | 2021-03-05 | 2021-08-03 |
| 2020-10-31 | 2021-03-12 | 2021-08-11 |
| 2020-11-05 | 2021-03-19 | 2021-08-17 |
| 2020-11-13 | 2021-03-25 | 2021-08-31 |
| 2020-11-15 | 2021-04-01 | 2021-09-10 |
| 2020-11-19 | 2021-04-09 | 2021-09-19 |
| 2020-11-27 | 2021-04-16 | 2021-09-23 |
| 2020-12-03 | 2021-04-24 | 2021-10-05 |
| 2020-12-10 | 2021-05-09 | 2021-10-11 |
| 2020-12-17 | 2021-05-14 | 2021-12-13 |
| 2020-12-22 | 2021-05-21 | 2021-12-22 |
| 2020-12-31 | 2021-05-28 | 2022-01-03 |
| 2021-01-08 | 2021-06-04 | 2022-01-06 |
| 2021-01-15 | 2021-06-11 | 2022-01-10 |
| 2021-01-22 | 2021-06-18 | 2022-01-17 |
| 2021-01-29 | 2021-06-25 | 2022-01-24 |
| 2021-02-05 | 2021-07-09 | 2022-01-31 |
| 2021-02-12 | 2021-07-16 | 2022-02-07 |
| 2021-02-19 |            | 2022-02-14 |

**Mortality type**

- Estimated excess mortality
- - Reported COVID-19 mortality

# Denmark

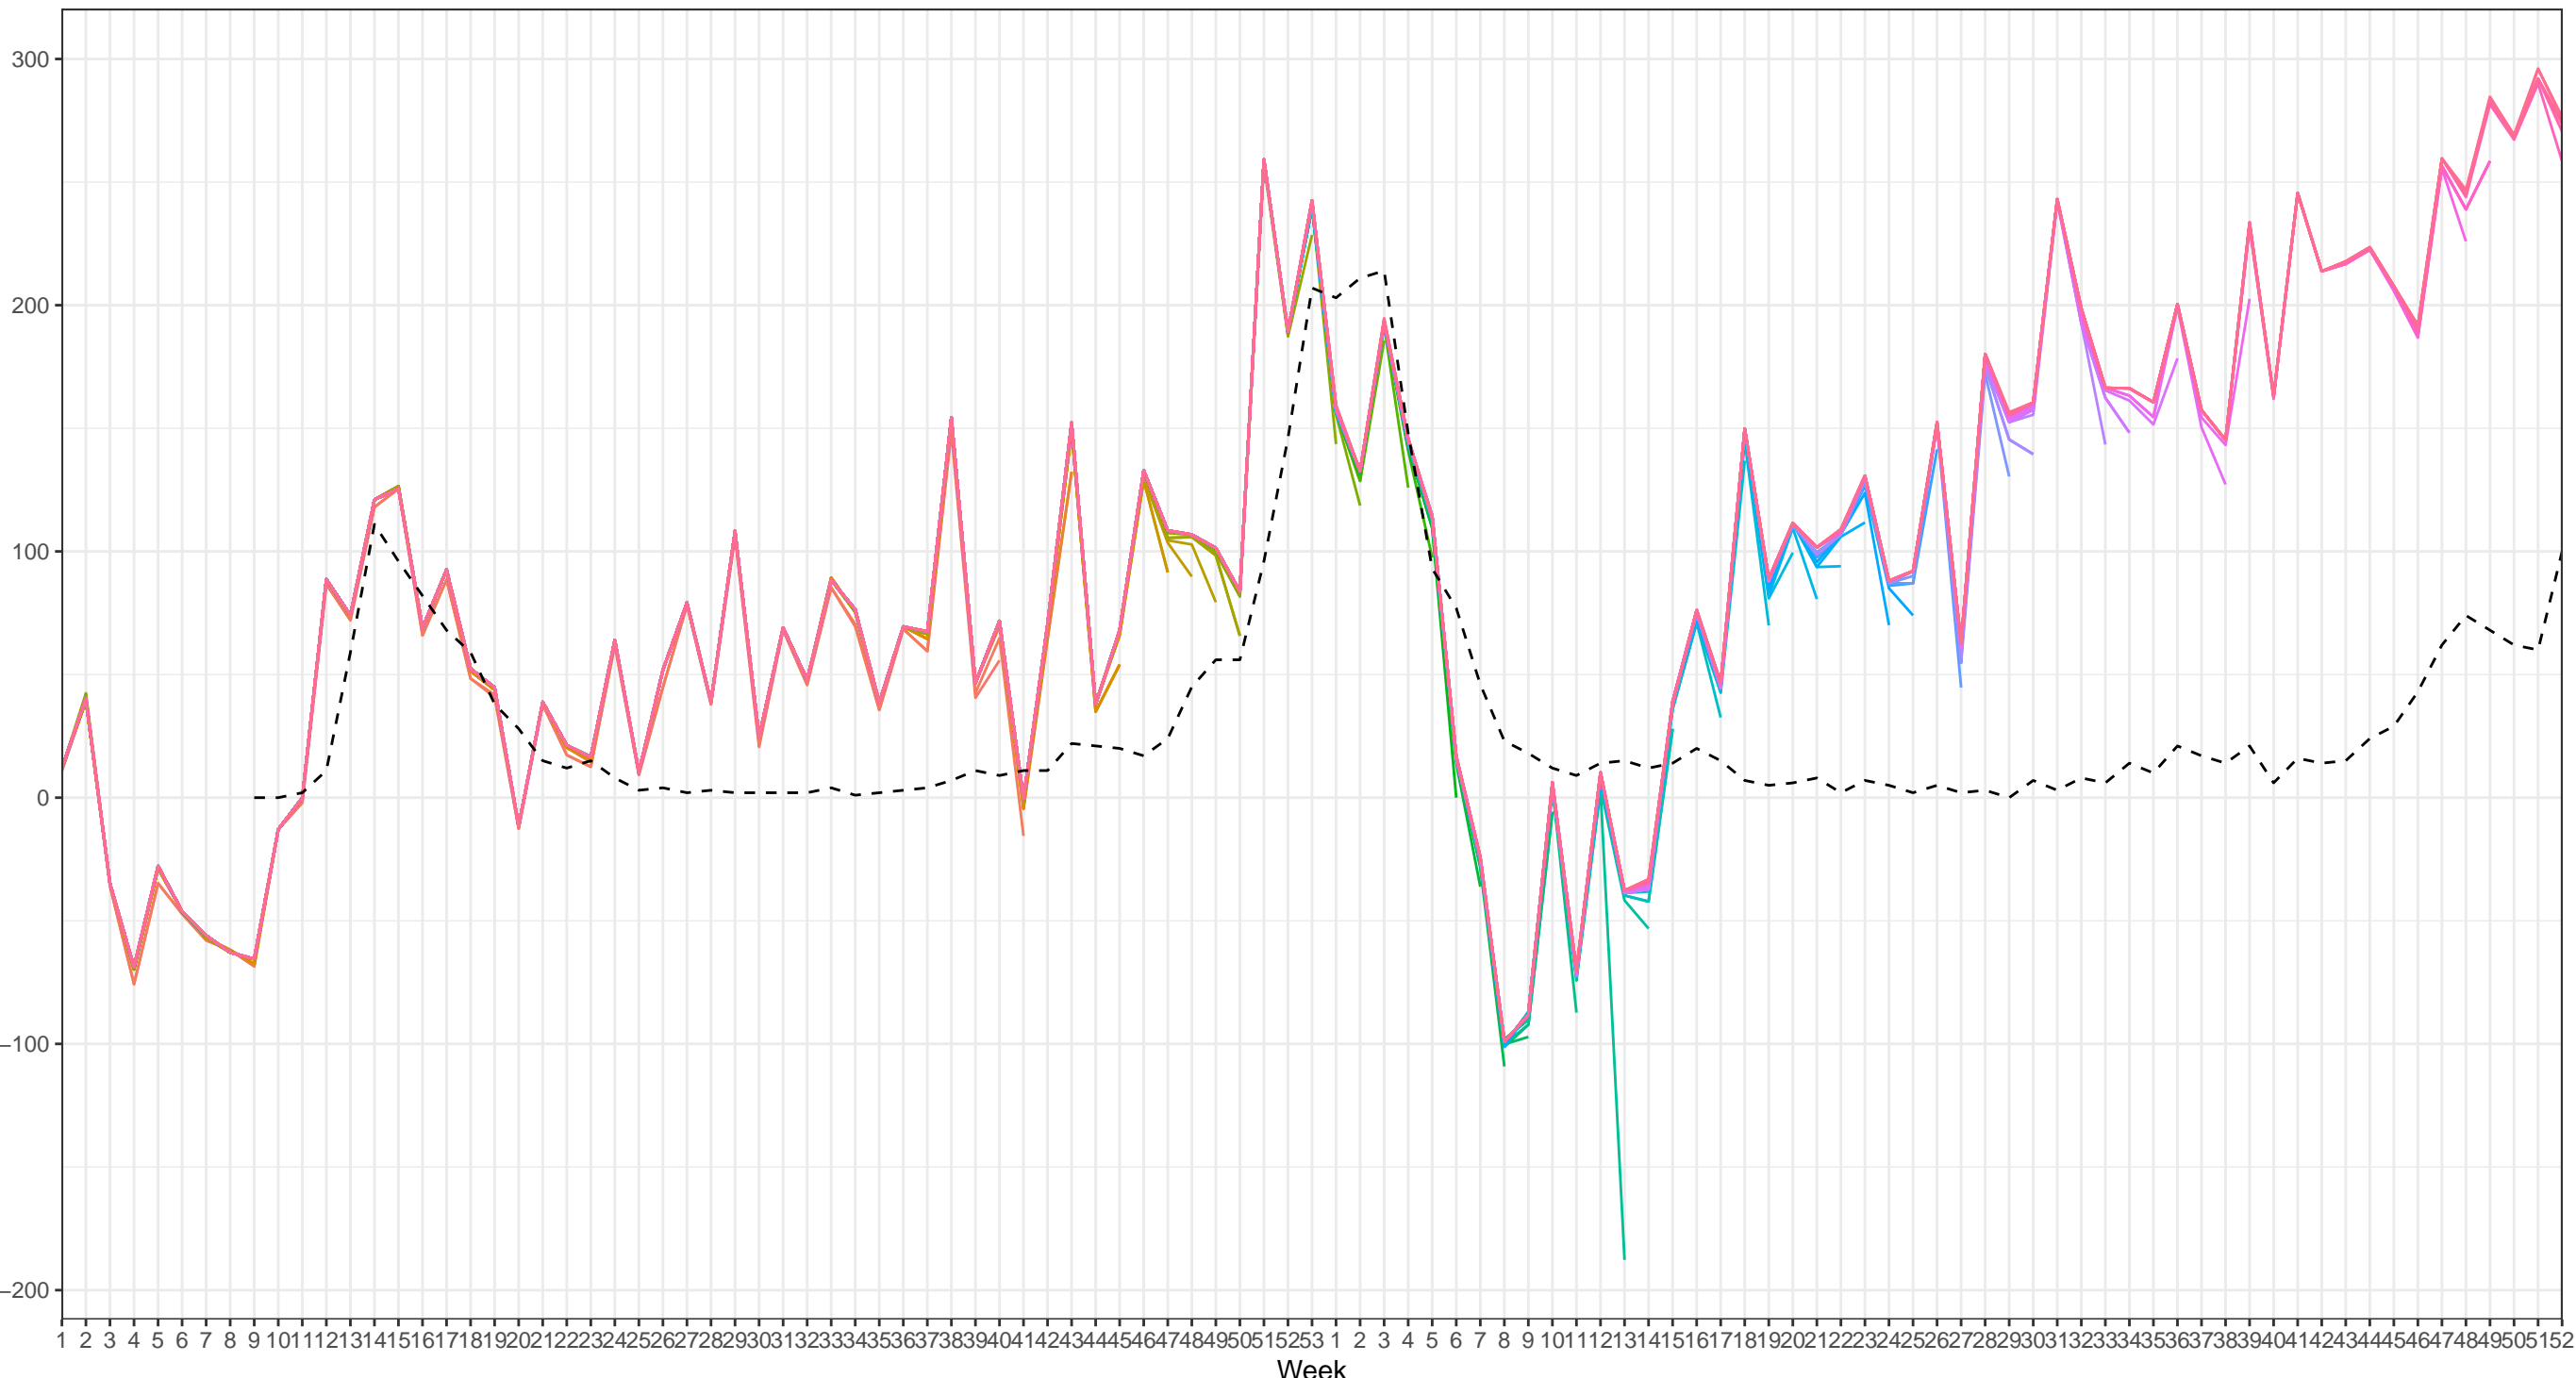

**Download date**

|            |            |            |
|------------|------------|------------|
| 2020-10-15 | 2021-02-26 | 2021-07-19 |
| 2020-10-22 | 2021-03-05 | 2021-08-03 |
| 2020-10-31 | 2021-03-12 | 2021-08-11 |
| 2020-11-05 | 2021-03-19 | 2021-08-17 |
| 2020-11-13 | 2021-03-25 | 2021-08-31 |
| 2020-11-15 | 2021-04-01 | 2021-09-10 |
| 2020-11-19 | 2021-04-09 | 2021-09-19 |
| 2020-11-27 | 2021-04-16 | 2021-09-23 |
| 2020-12-03 | 2021-04-24 | 2021-10-05 |
| 2020-12-10 | 2021-05-09 | 2021-10-11 |
| 2020-12-17 | 2021-05-14 | 2021-12-13 |
| 2020-12-22 | 2021-05-21 | 2021-12-22 |
| 2020-12-31 | 2021-05-28 | 2022-01-03 |
| 2021-01-08 | 2021-06-04 | 2022-01-10 |
| 2021-01-15 | 2021-06-11 | 2022-01-17 |
| 2021-01-22 | 2021-06-18 | 2022-01-24 |
| 2021-01-29 | 2021-06-25 | 2022-01-31 |
| 2021-02-05 | 2021-07-09 | 2022-02-07 |
| 2021-02-12 | 2021-07-16 | 2022-02-14 |
| 2021-02-19 |            |            |

**Mortality type**

- Estimated excess mortality
- - Reported COVID-19 mortality

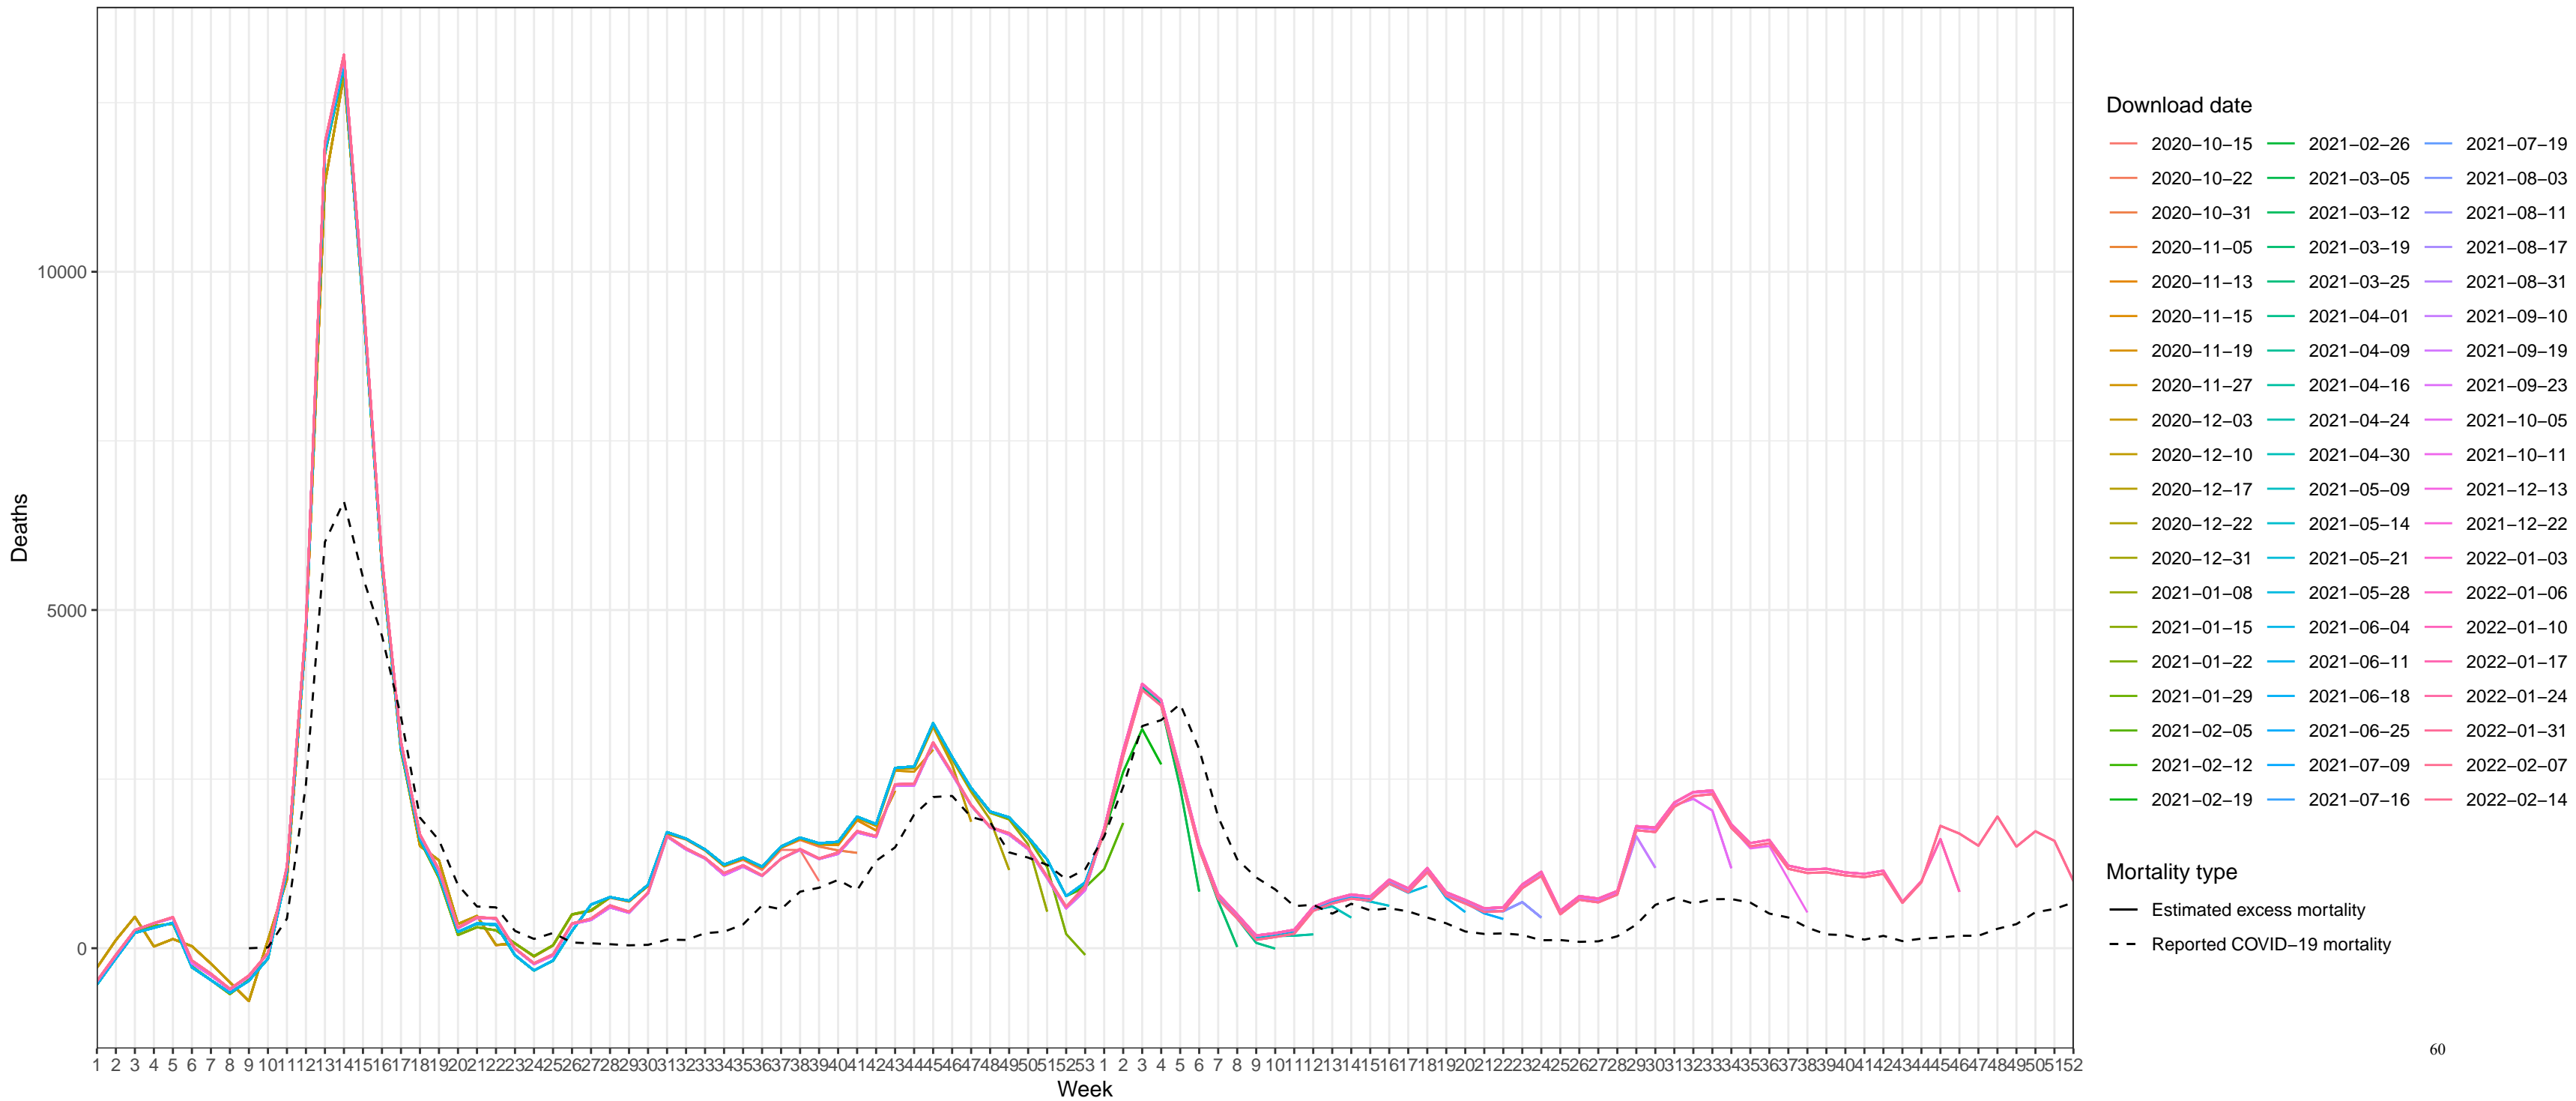

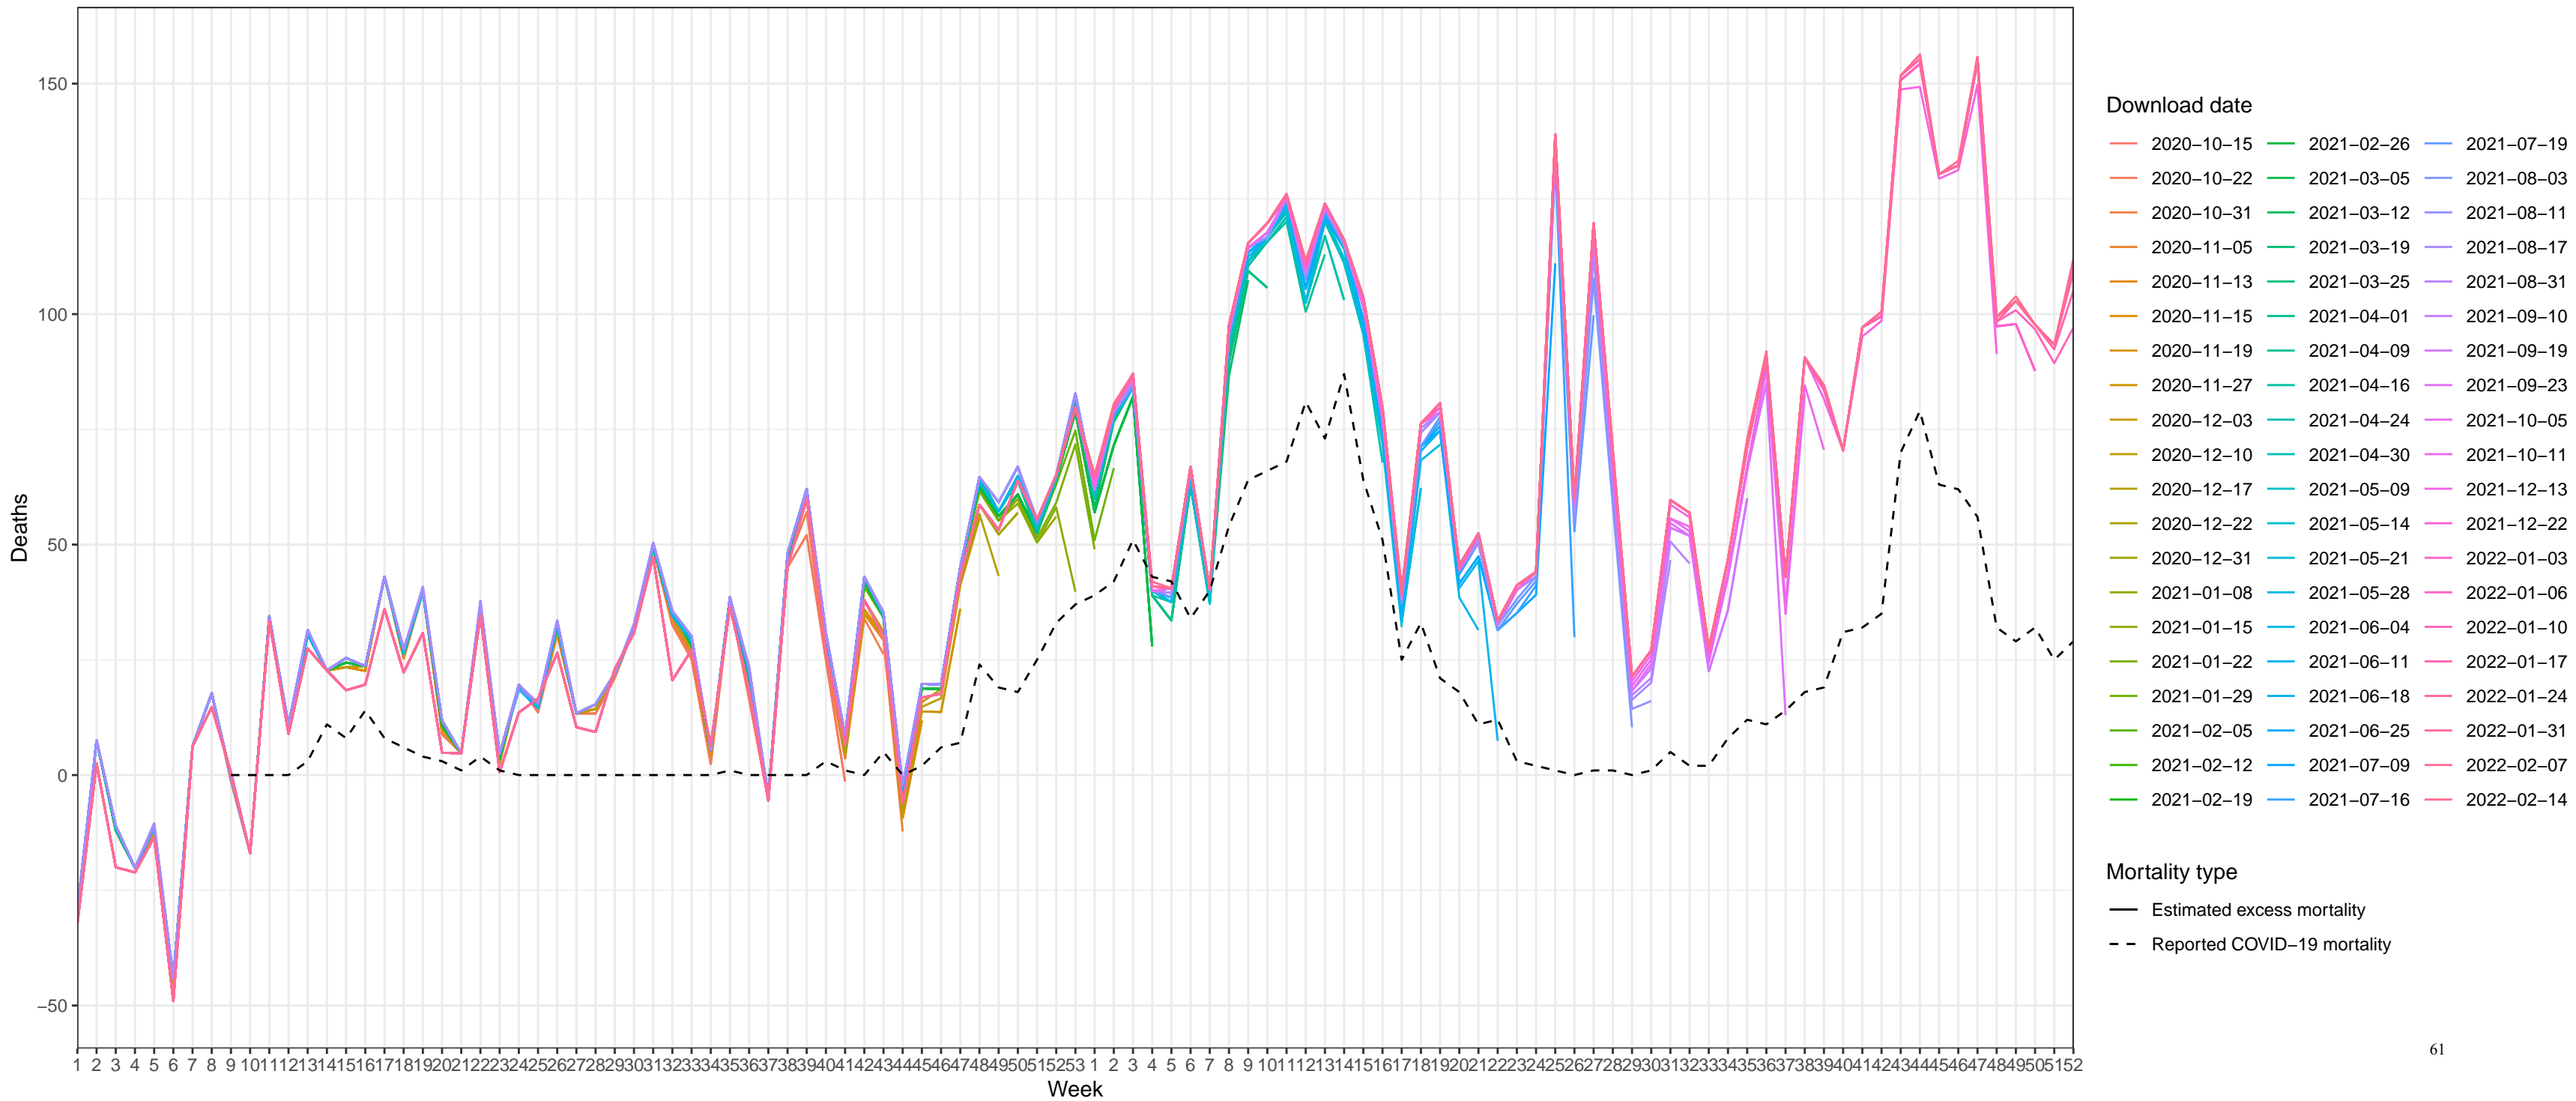

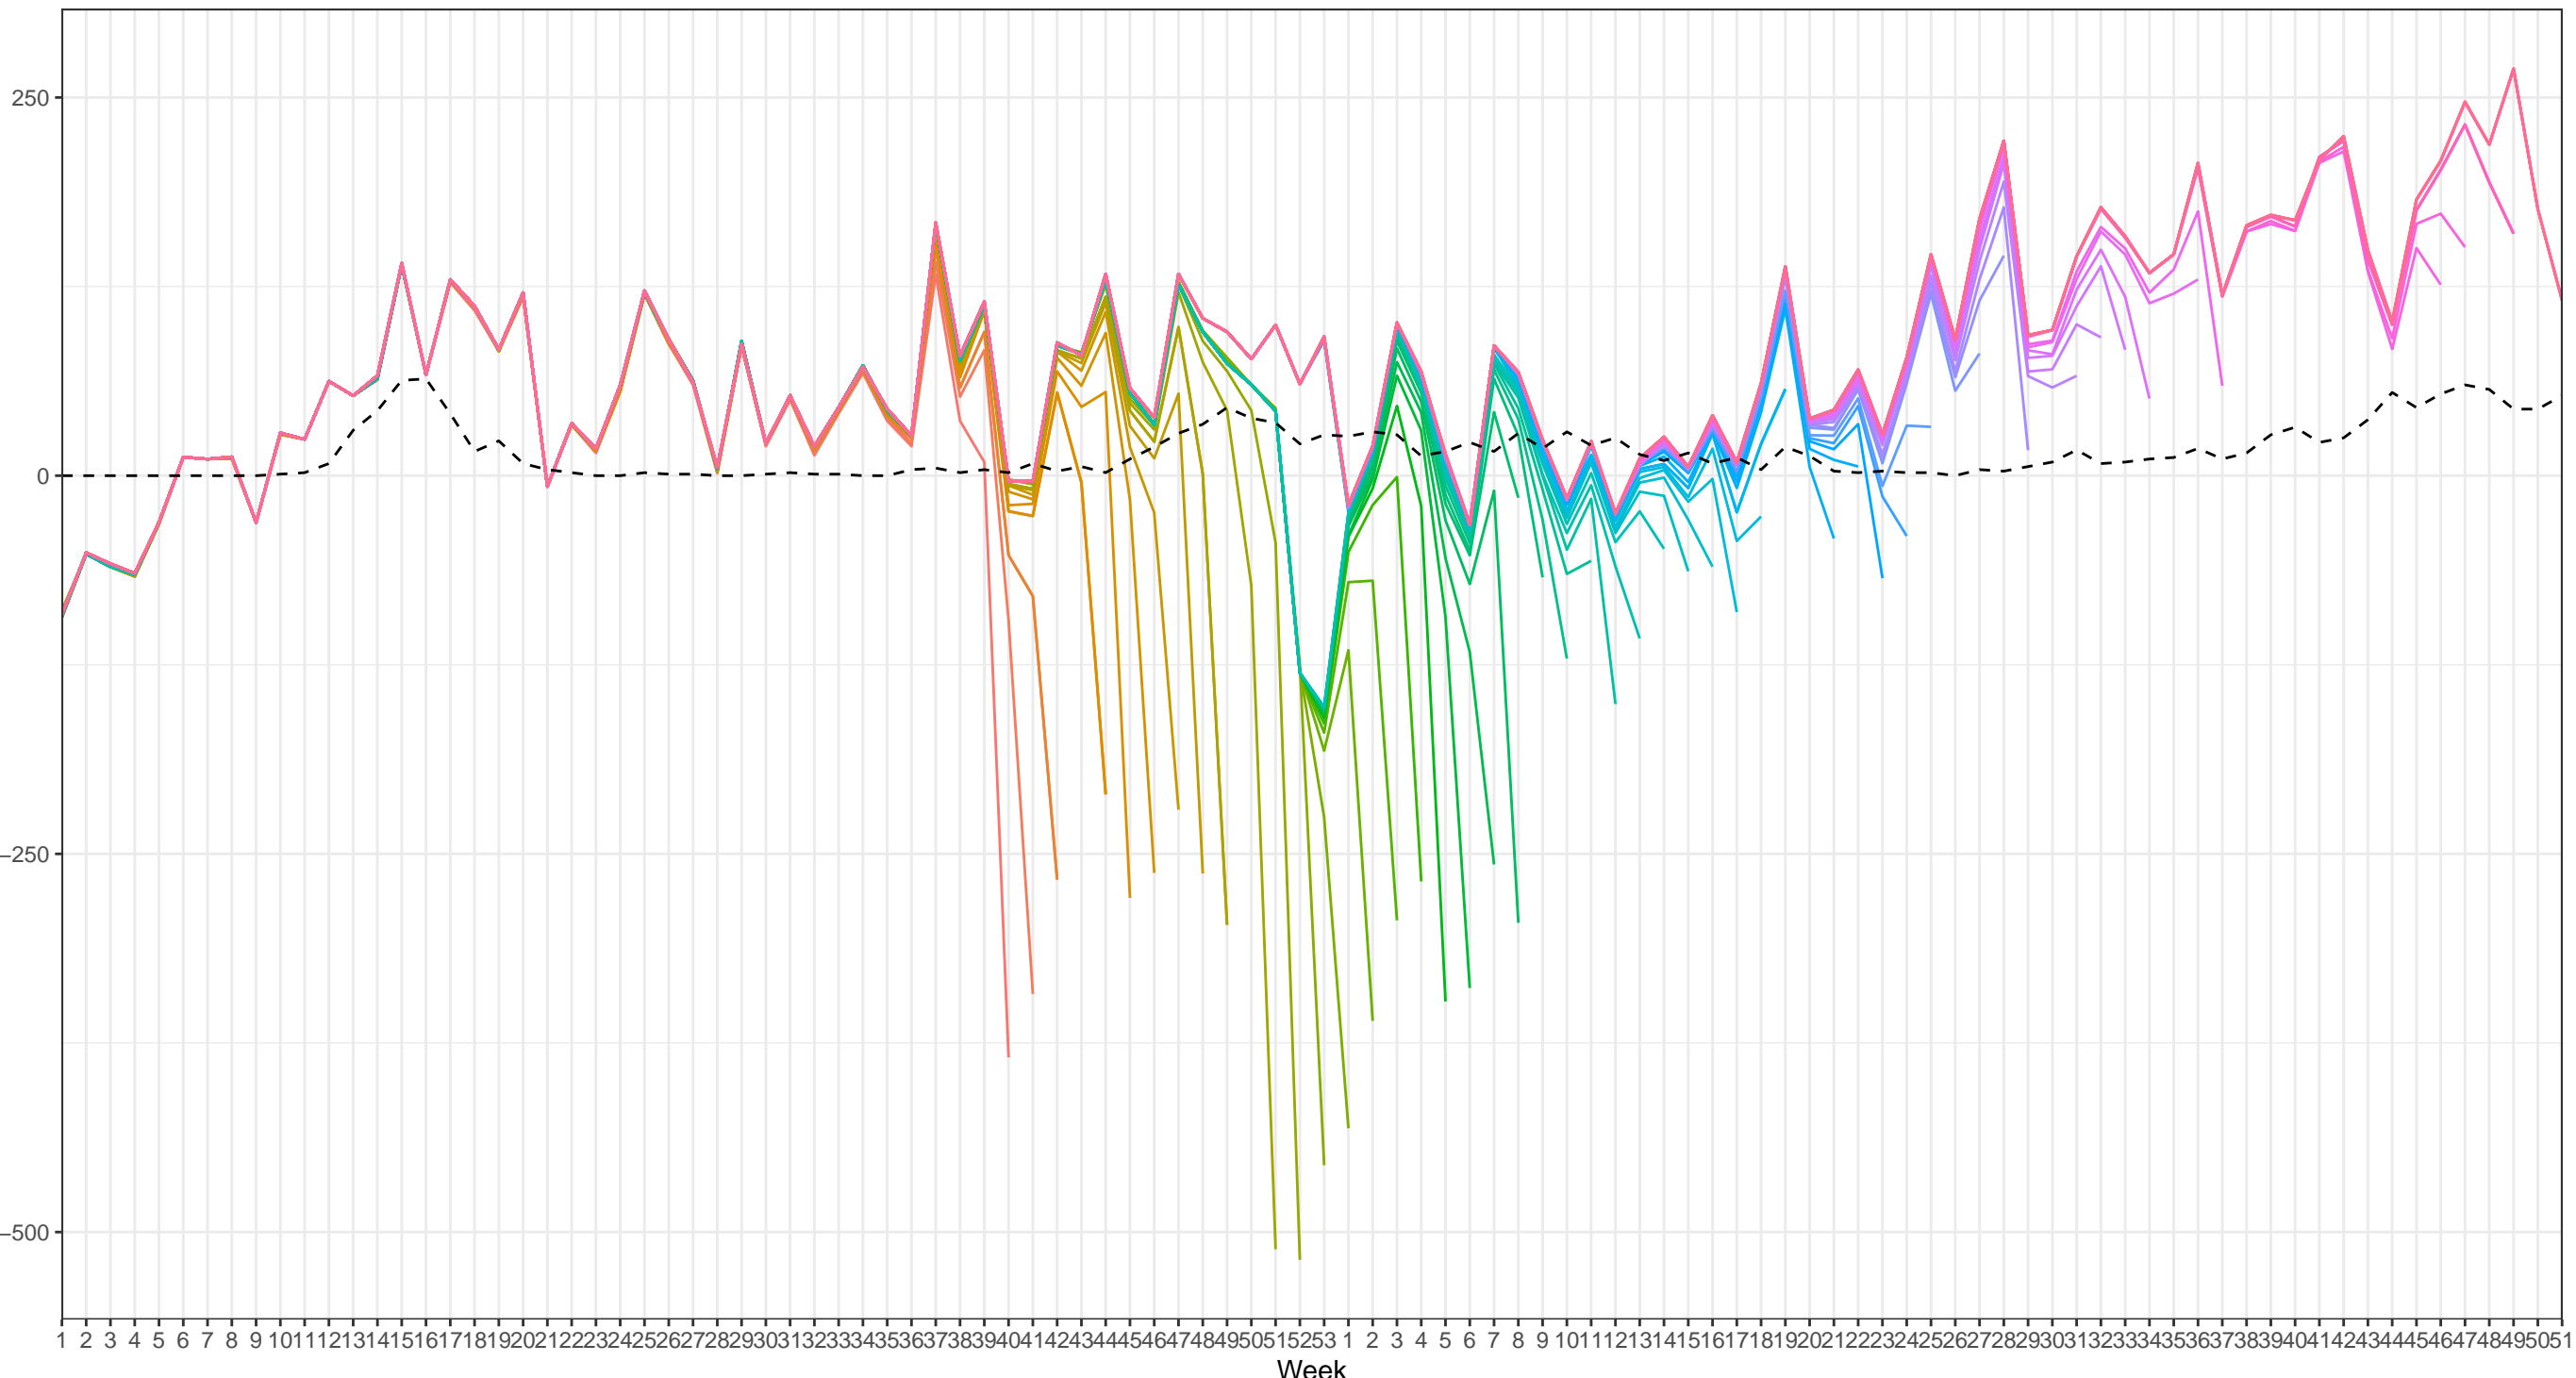

- Download date**
- |            |            |            |
|------------|------------|------------|
| 2020-10-15 | 2021-02-26 | 2021-07-19 |
| 2020-10-22 | 2021-03-05 | 2021-08-03 |
| 2020-10-31 | 2021-03-12 | 2021-08-11 |
| 2020-11-05 | 2021-03-19 | 2021-08-17 |
| 2020-11-13 | 2021-03-25 | 2021-08-31 |
| 2020-11-15 | 2021-04-01 | 2021-09-10 |
| 2020-11-19 | 2021-04-09 | 2021-09-19 |
| 2020-11-27 | 2021-04-16 | 2021-09-23 |
| 2020-12-03 | 2021-04-24 | 2021-10-05 |
| 2020-12-10 | 2021-05-09 | 2021-10-11 |
| 2020-12-17 | 2021-05-14 | 2021-12-13 |
| 2020-12-22 | 2021-05-21 | 2021-12-22 |
| 2020-12-31 | 2021-05-28 | 2022-01-03 |
| 2021-01-08 | 2021-06-04 | 2022-01-06 |
| 2021-01-15 | 2021-06-11 | 2022-01-10 |
| 2021-01-22 | 2021-06-18 | 2022-01-17 |
| 2021-01-29 | 2021-06-25 | 2022-01-24 |
| 2021-02-05 | 2021-07-09 | 2022-01-31 |
| 2021-02-12 | 2021-07-16 | 2022-02-07 |
| 2021-02-19 |            | 2022-02-14 |

- Mortality type**
- Estimated excess mortality
  - - Reported COVID-19 mortality

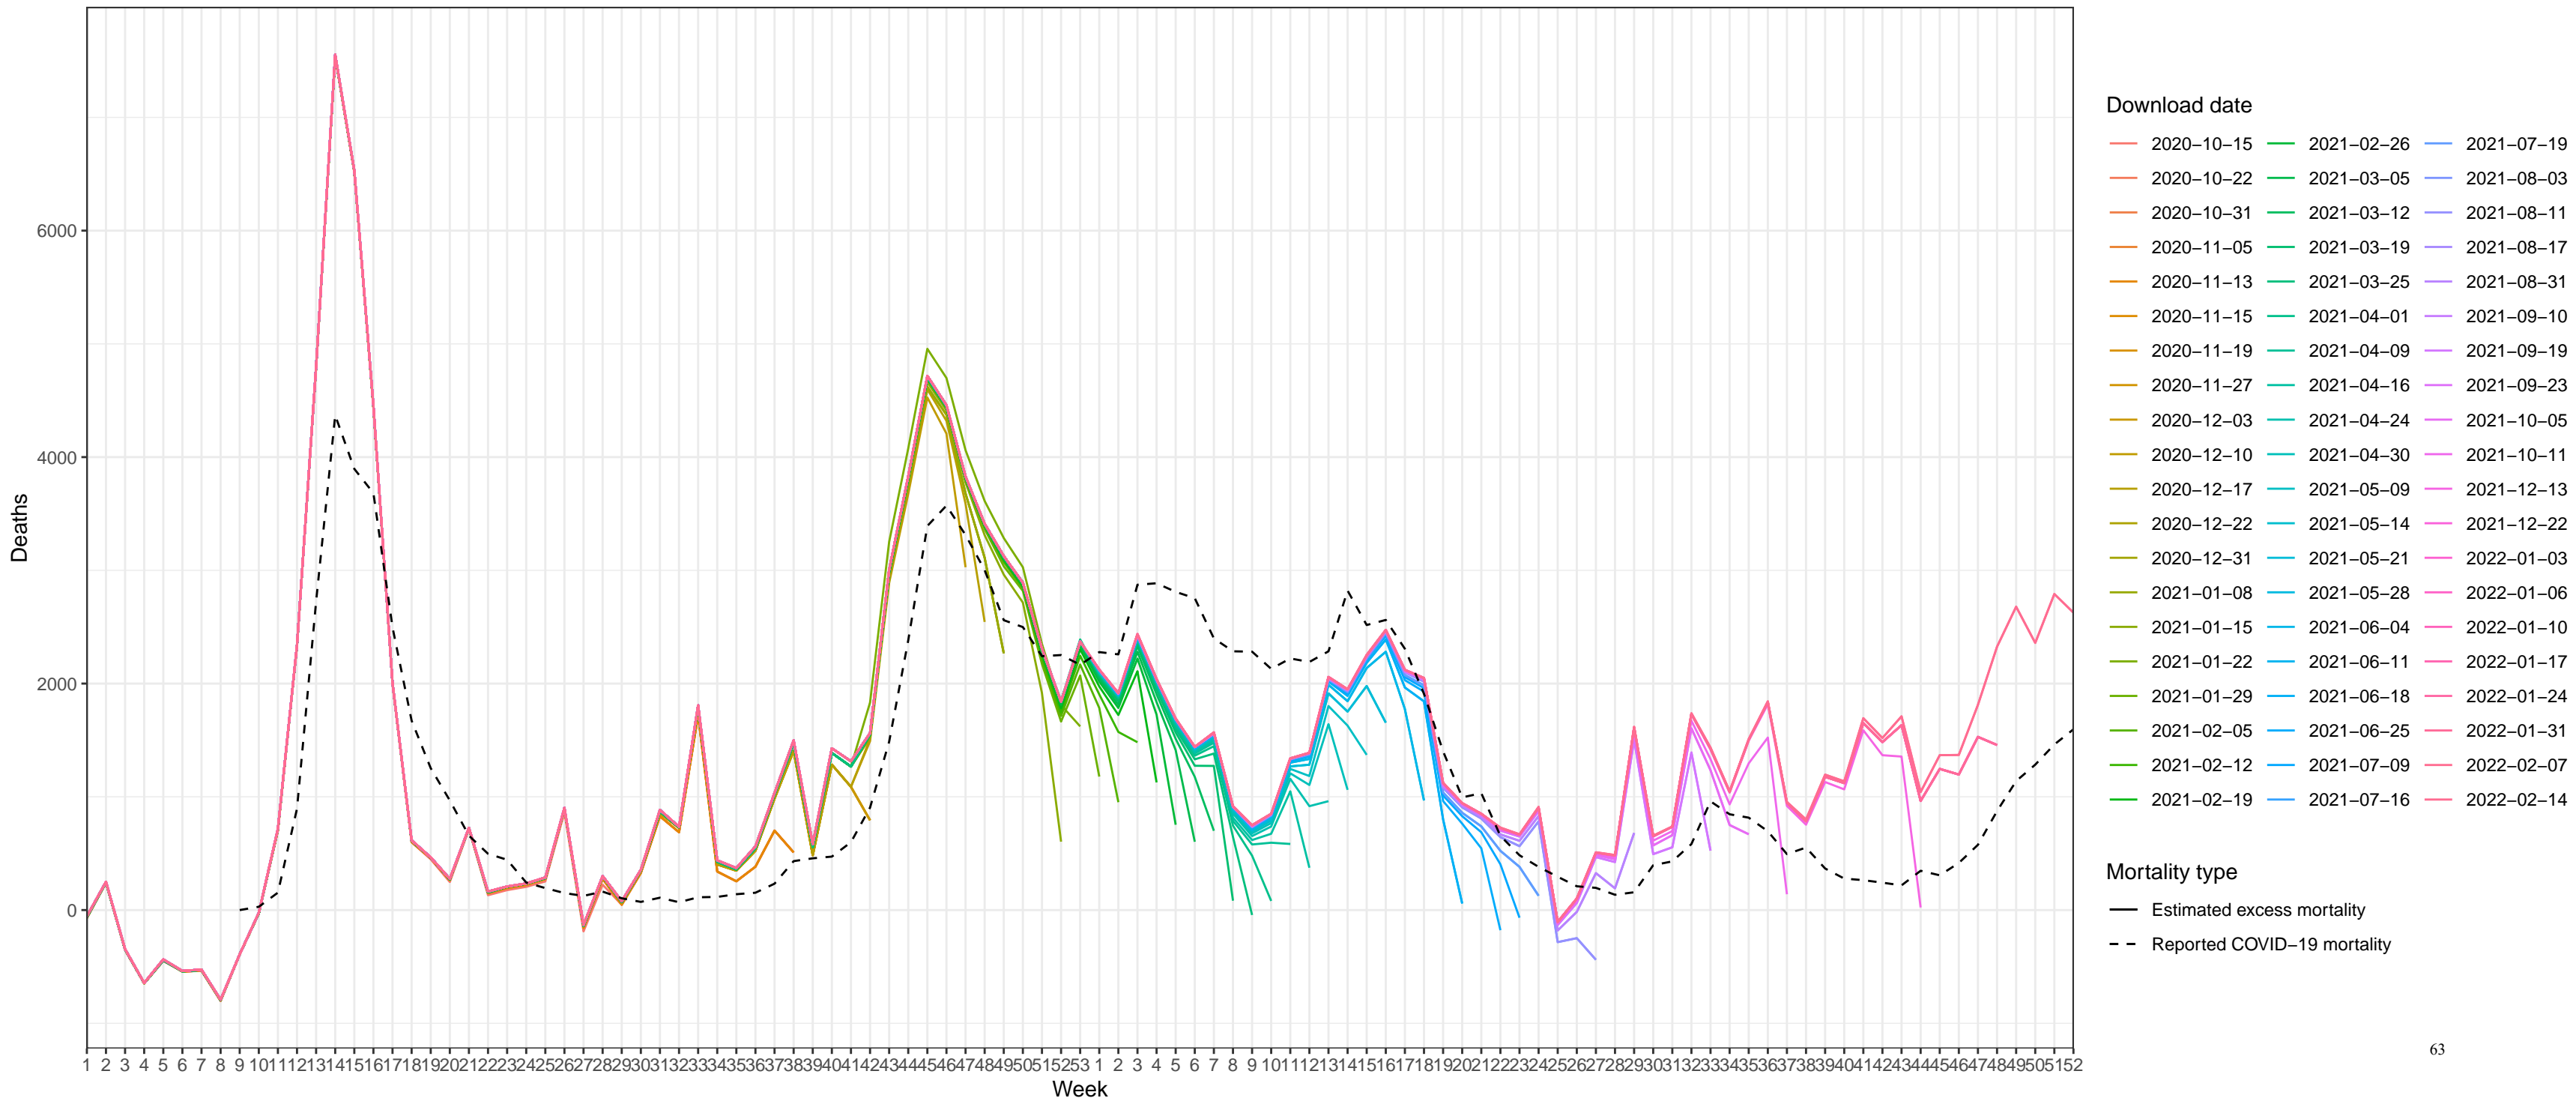

**Download date**

|            |            |            |
|------------|------------|------------|
| 2020-10-15 | 2021-02-26 | 2021-07-19 |
| 2020-10-22 | 2021-03-05 | 2021-08-03 |
| 2020-10-31 | 2021-03-12 | 2021-08-11 |
| 2020-11-05 | 2021-03-19 | 2021-08-17 |
| 2020-11-13 | 2021-03-25 | 2021-08-31 |
| 2020-11-15 | 2021-04-01 | 2021-09-10 |
| 2020-11-19 | 2021-04-09 | 2021-09-19 |
| 2020-11-27 | 2021-04-16 | 2021-09-23 |
| 2020-12-03 | 2021-04-24 | 2021-10-05 |
| 2020-12-10 | 2021-05-09 | 2021-10-11 |
| 2020-12-17 | 2021-05-14 | 2021-12-13 |
| 2020-12-22 | 2021-05-21 | 2021-12-22 |
| 2020-12-31 | 2021-05-28 | 2022-01-03 |
| 2021-01-08 | 2021-06-04 | 2022-01-06 |
| 2021-01-15 | 2021-06-11 | 2022-01-10 |
| 2021-01-22 | 2021-06-18 | 2022-01-17 |
| 2021-01-29 | 2021-06-25 | 2022-01-24 |
| 2021-02-05 | 2021-07-09 | 2022-01-31 |
| 2021-02-12 | 2021-07-16 | 2022-02-07 |
| 2021-02-19 |            | 2022-02-14 |

**Mortality type**

- Estimated excess mortality
- - Reported COVID-19 mortality



# Northern Ireland

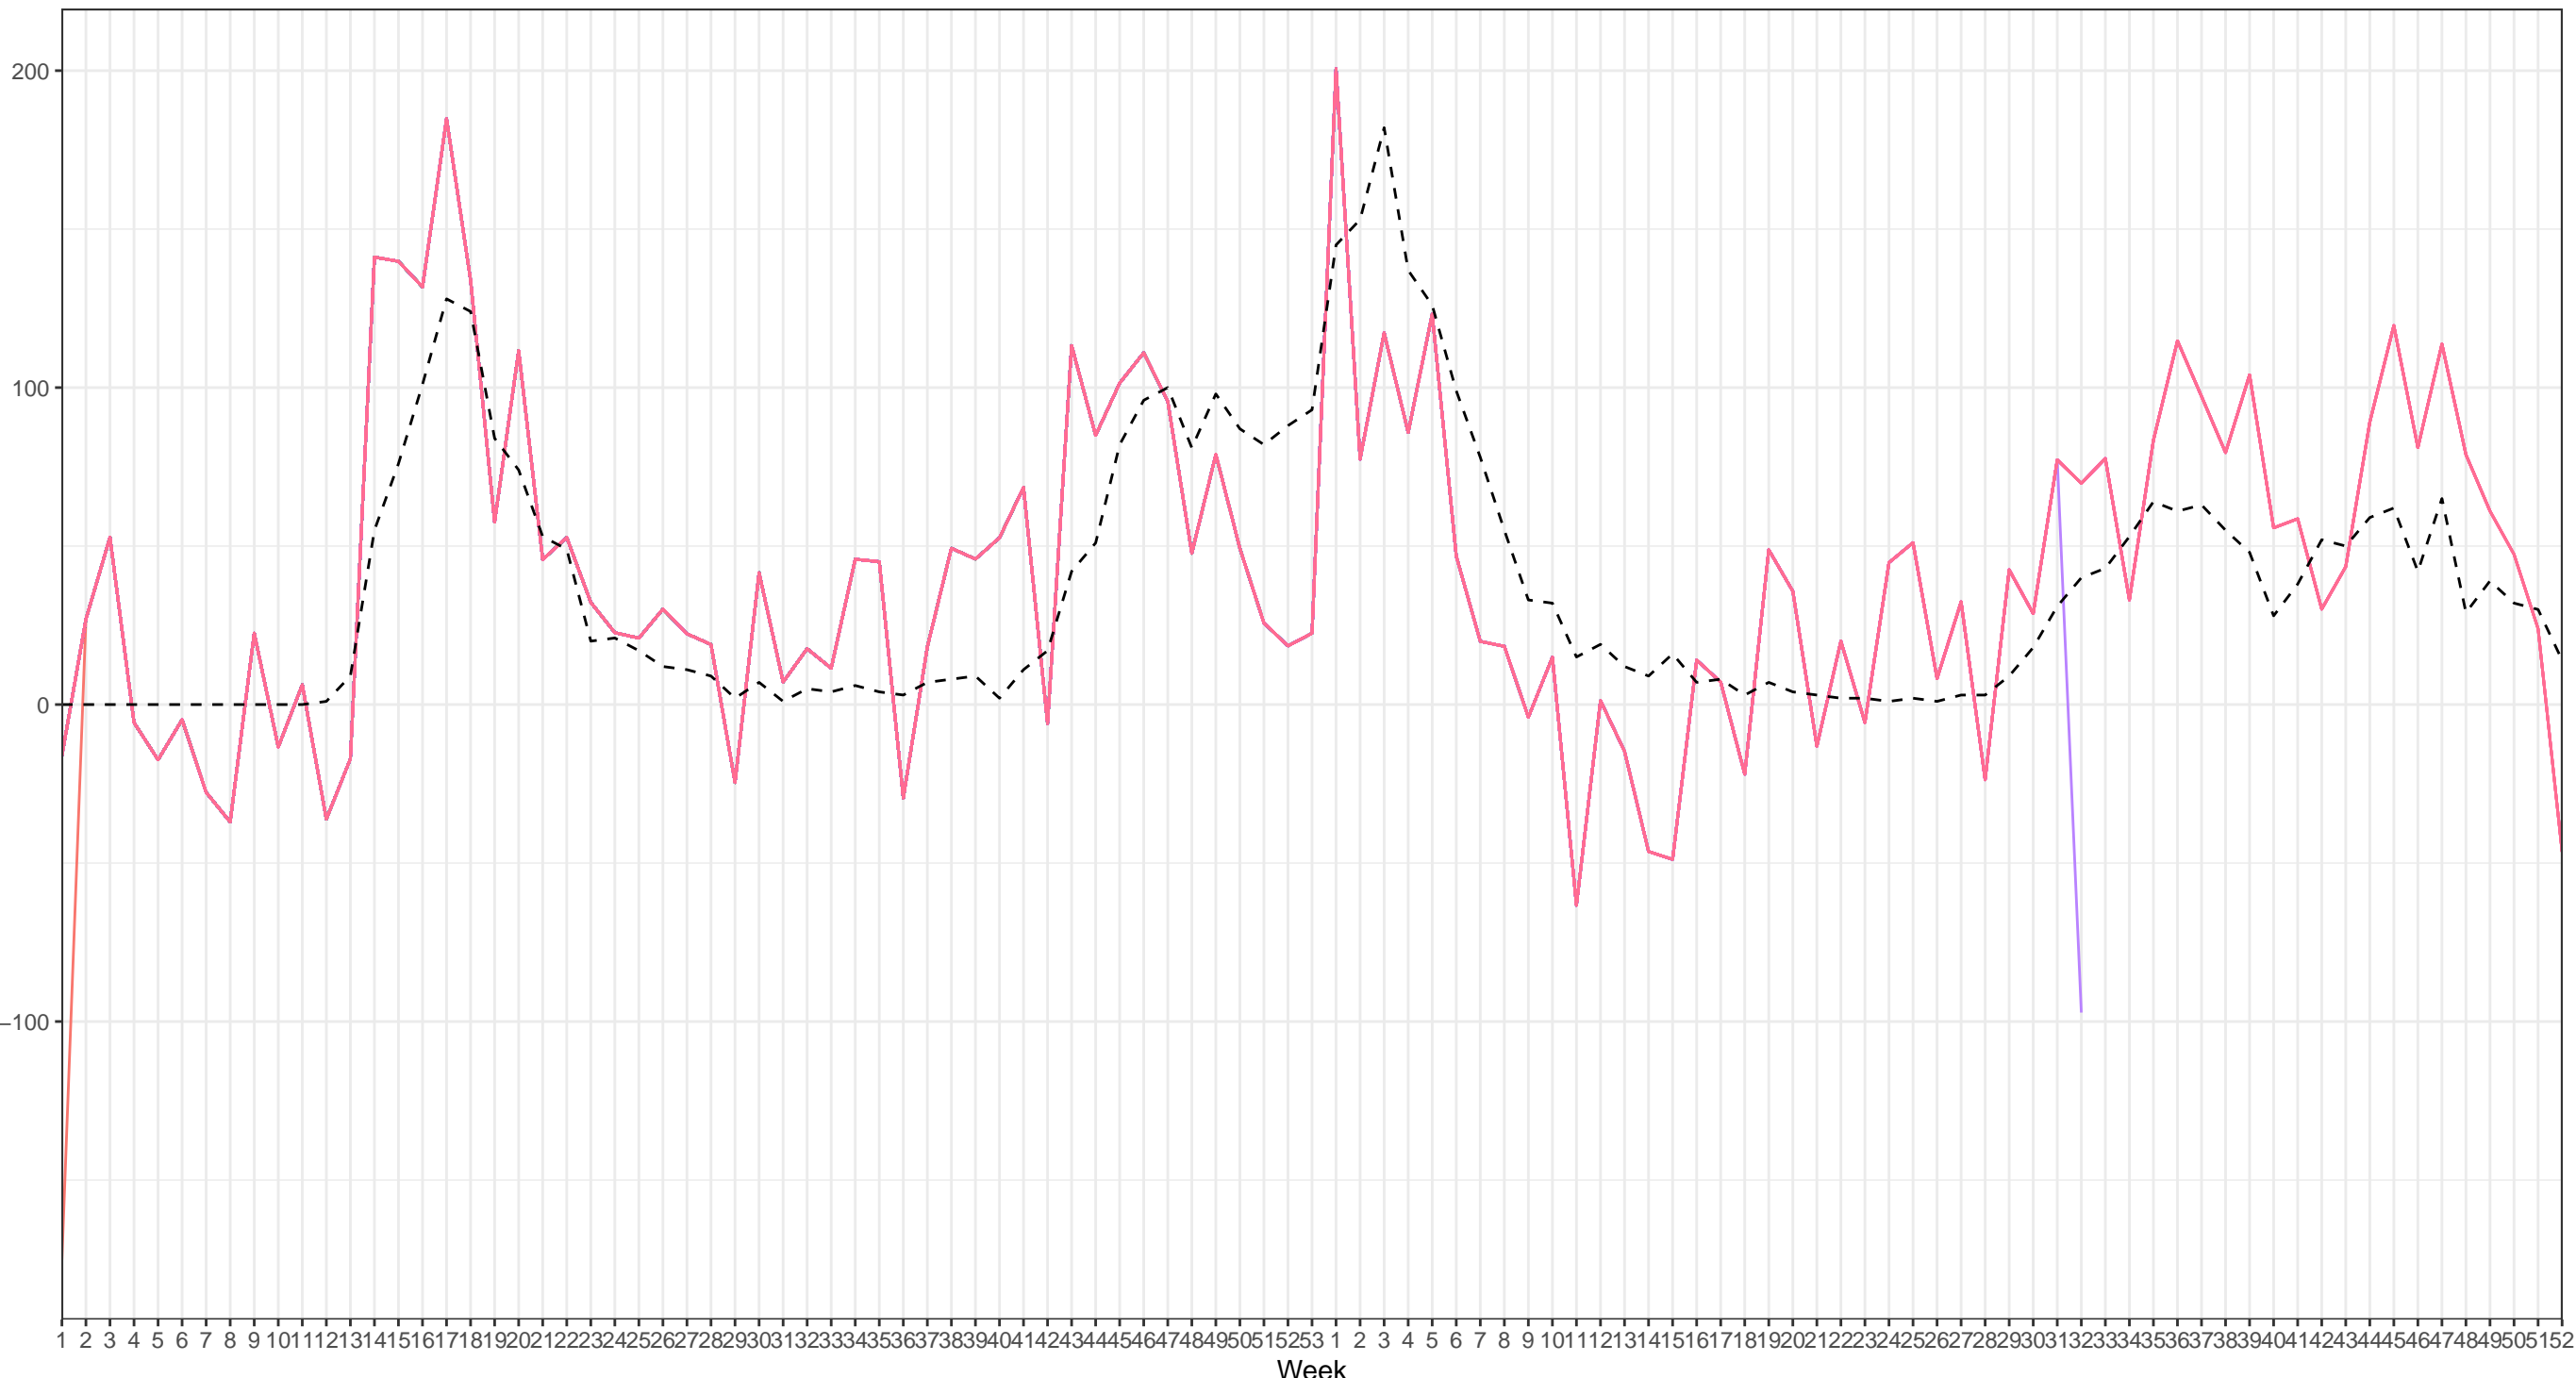

- Download date**
- 2020-10-15
  - 2020-10-22
  - 2020-10-31
  - 2020-11-05
  - 2020-11-13
  - 2020-11-15
  - 2020-11-19
  - 2020-11-27
  - 2020-12-03
  - 2020-12-10
  - 2020-12-17
  - 2020-12-22
  - 2020-12-31
  - 2021-01-08
  - 2021-01-15
  - 2021-01-22
  - 2021-01-29
  - 2021-02-05
  - 2021-02-12
  - 2021-02-19
  - 2021-02-26
  - 2021-03-05
  - 2021-03-12
  - 2021-03-19
  - 2021-03-25
  - 2021-04-01
  - 2021-04-09
  - 2021-04-16
  - 2021-04-24
  - 2021-05-09
  - 2021-05-14
  - 2021-05-21
  - 2021-05-28
  - 2021-06-04
  - 2021-06-11
  - 2021-06-18
  - 2021-06-25
  - 2021-07-09
  - 2021-07-16
  - 2021-07-19
  - 2021-08-03
  - 2021-08-11
  - 2021-08-17
  - 2021-08-31
  - 2021-09-10
  - 2021-09-19
  - 2021-09-23
  - 2021-10-05
  - 2021-10-11
  - 2021-12-13
  - 2021-12-22
  - 2022-01-03
  - 2022-01-06
  - 2022-01-10
  - 2022-01-17
  - 2022-01-24
  - 2022-01-31
  - 2022-02-07
  - 2022-02-14

- Mortality type**
- Estimated excess mortality
  - - Reported COVID-19 mortality

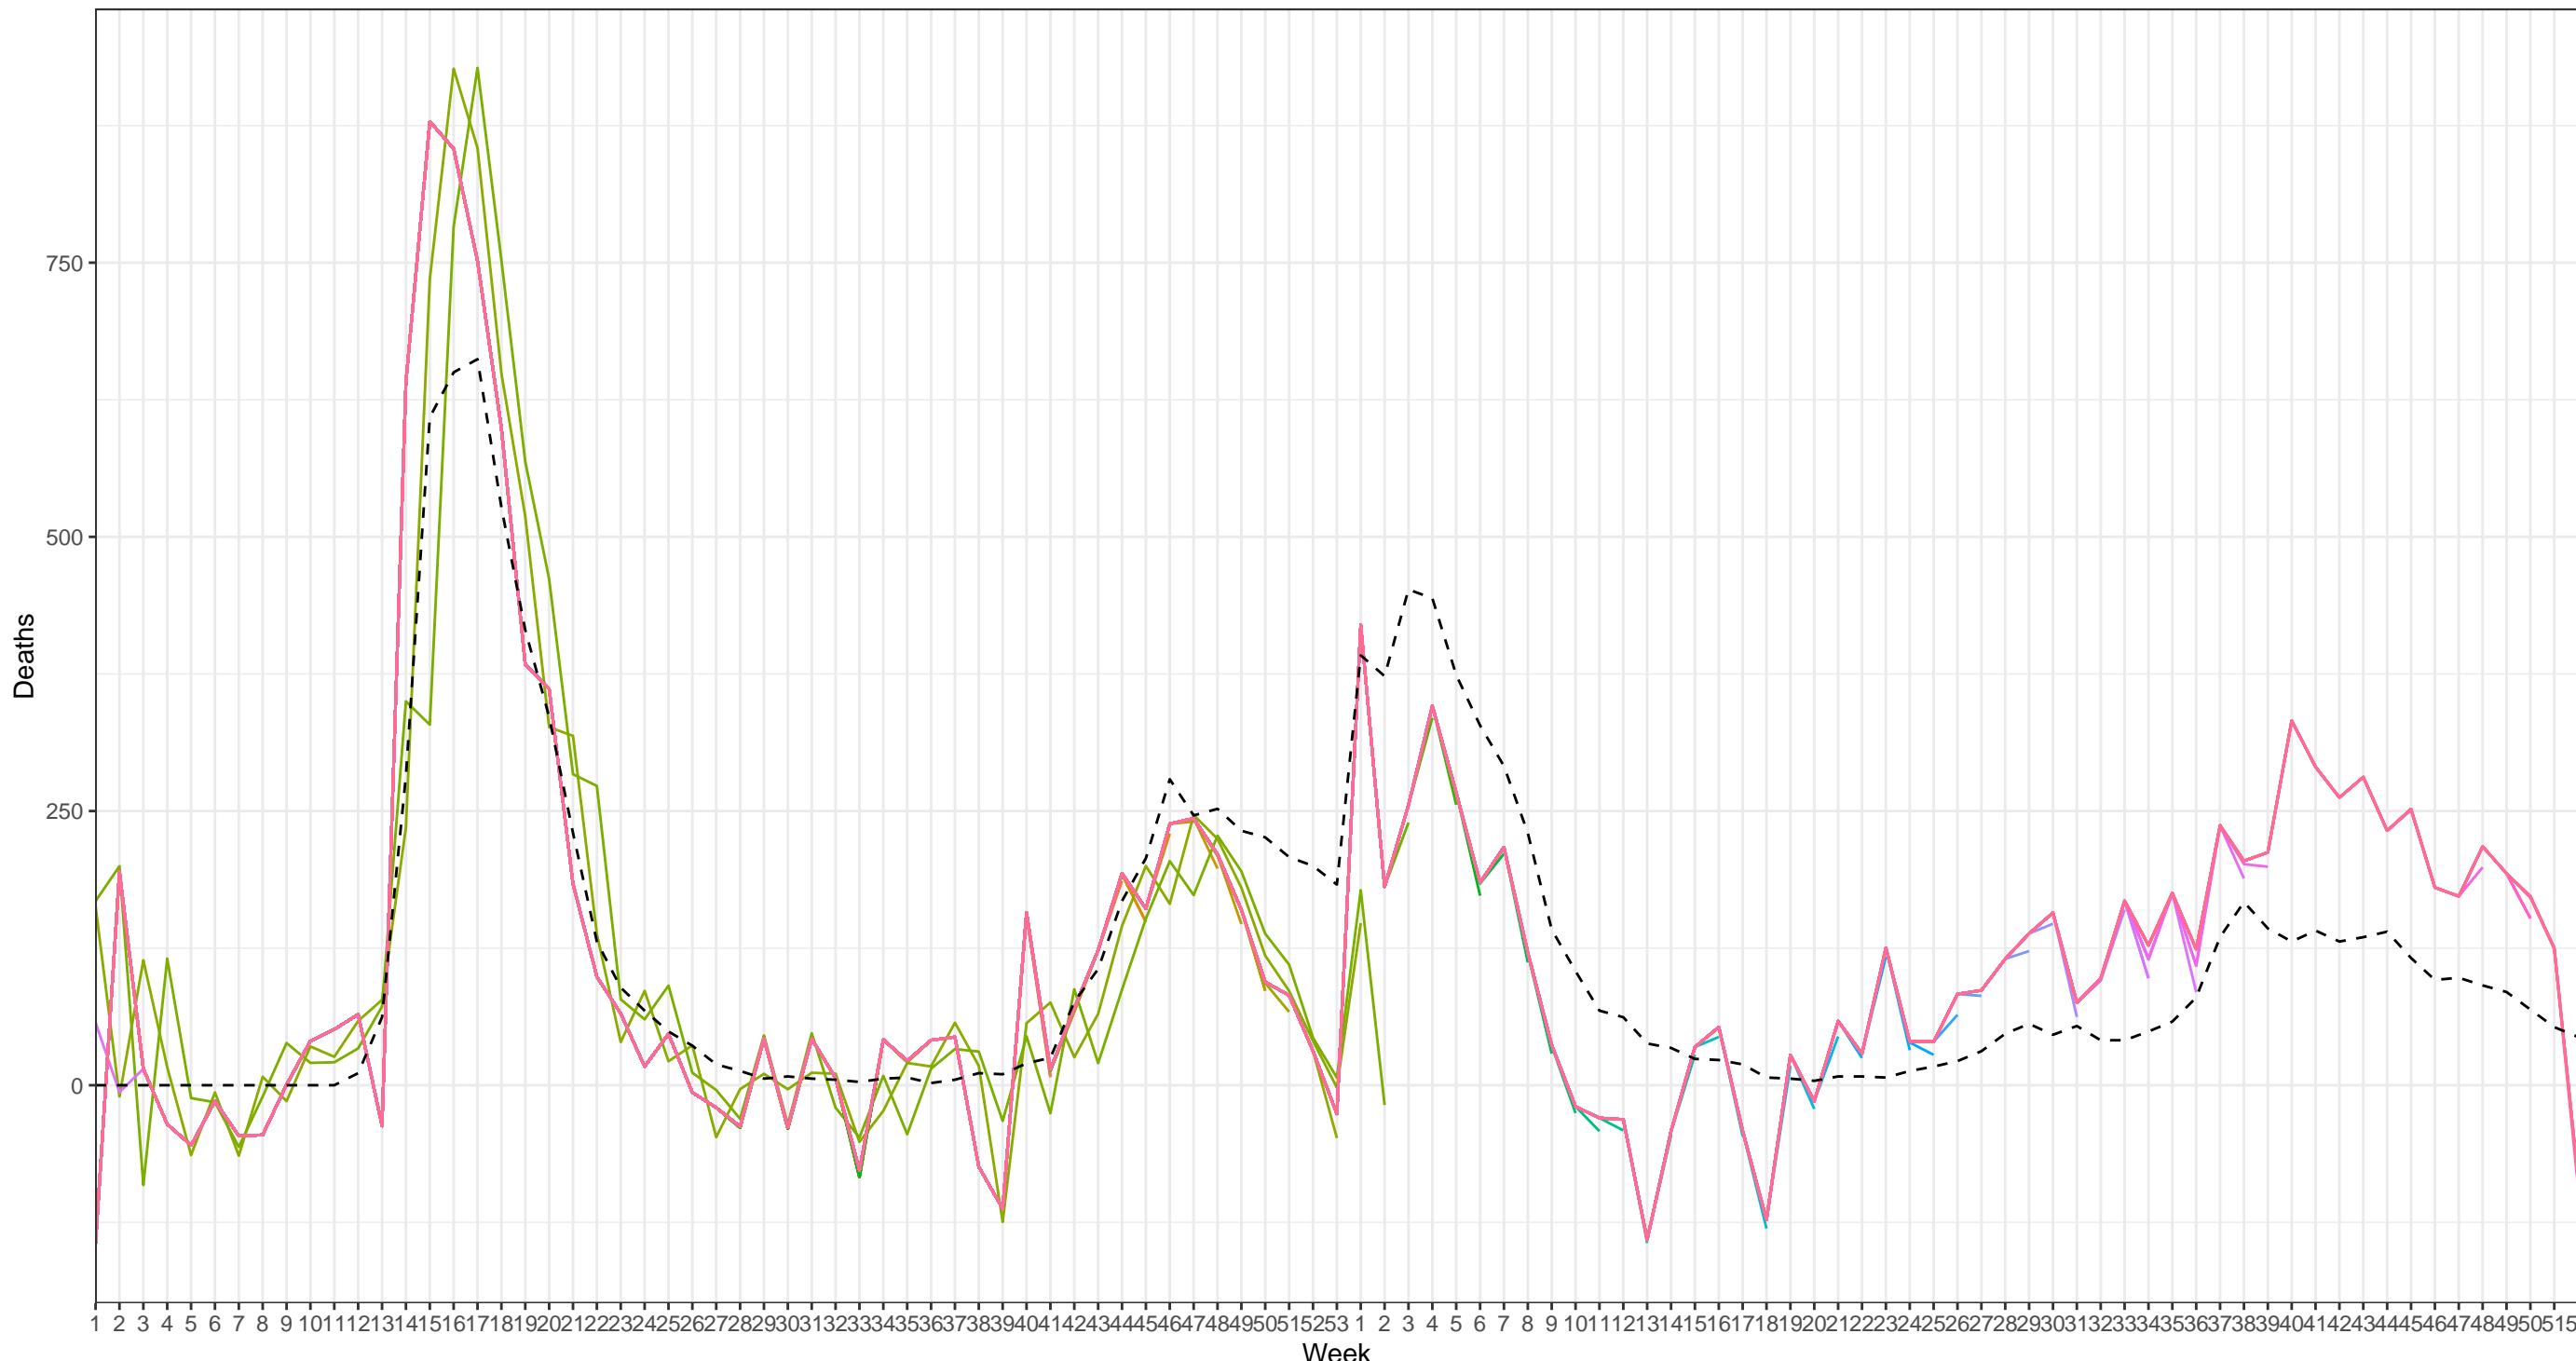

**Download date**

|            |            |            |
|------------|------------|------------|
| 2020-10-15 | 2021-02-26 | 2021-07-19 |
| 2020-10-22 | 2021-03-05 | 2021-08-03 |
| 2020-10-31 | 2021-03-12 | 2021-08-11 |
| 2020-11-05 | 2021-03-19 | 2021-08-17 |
| 2020-11-13 | 2021-03-25 | 2021-08-31 |
| 2020-11-15 | 2021-04-01 | 2021-09-10 |
| 2020-11-19 | 2021-04-09 | 2021-09-19 |
| 2020-11-27 | 2021-04-16 | 2021-09-23 |
| 2020-12-03 | 2021-04-24 | 2021-10-05 |
| 2020-12-10 | 2021-05-09 | 2021-10-11 |
| 2020-12-17 | 2021-05-14 | 2021-12-13 |
| 2020-12-22 | 2021-05-21 | 2021-12-22 |
| 2020-12-31 | 2021-05-28 | 2022-01-03 |
| 2021-01-08 | 2021-06-04 | 2022-01-06 |
| 2021-01-15 | 2021-06-11 | 2022-01-10 |
| 2021-01-22 | 2021-06-18 | 2022-01-17 |
| 2021-01-29 | 2021-06-25 | 2022-01-24 |
| 2021-02-05 | 2021-07-09 | 2022-01-31 |
| 2021-02-12 | 2021-07-16 | 2022-02-07 |
| 2021-02-19 |            | 2022-02-14 |

**Mortality type**

- Estimated excess mortality
- - Reported COVID-19 mortality

# Greece

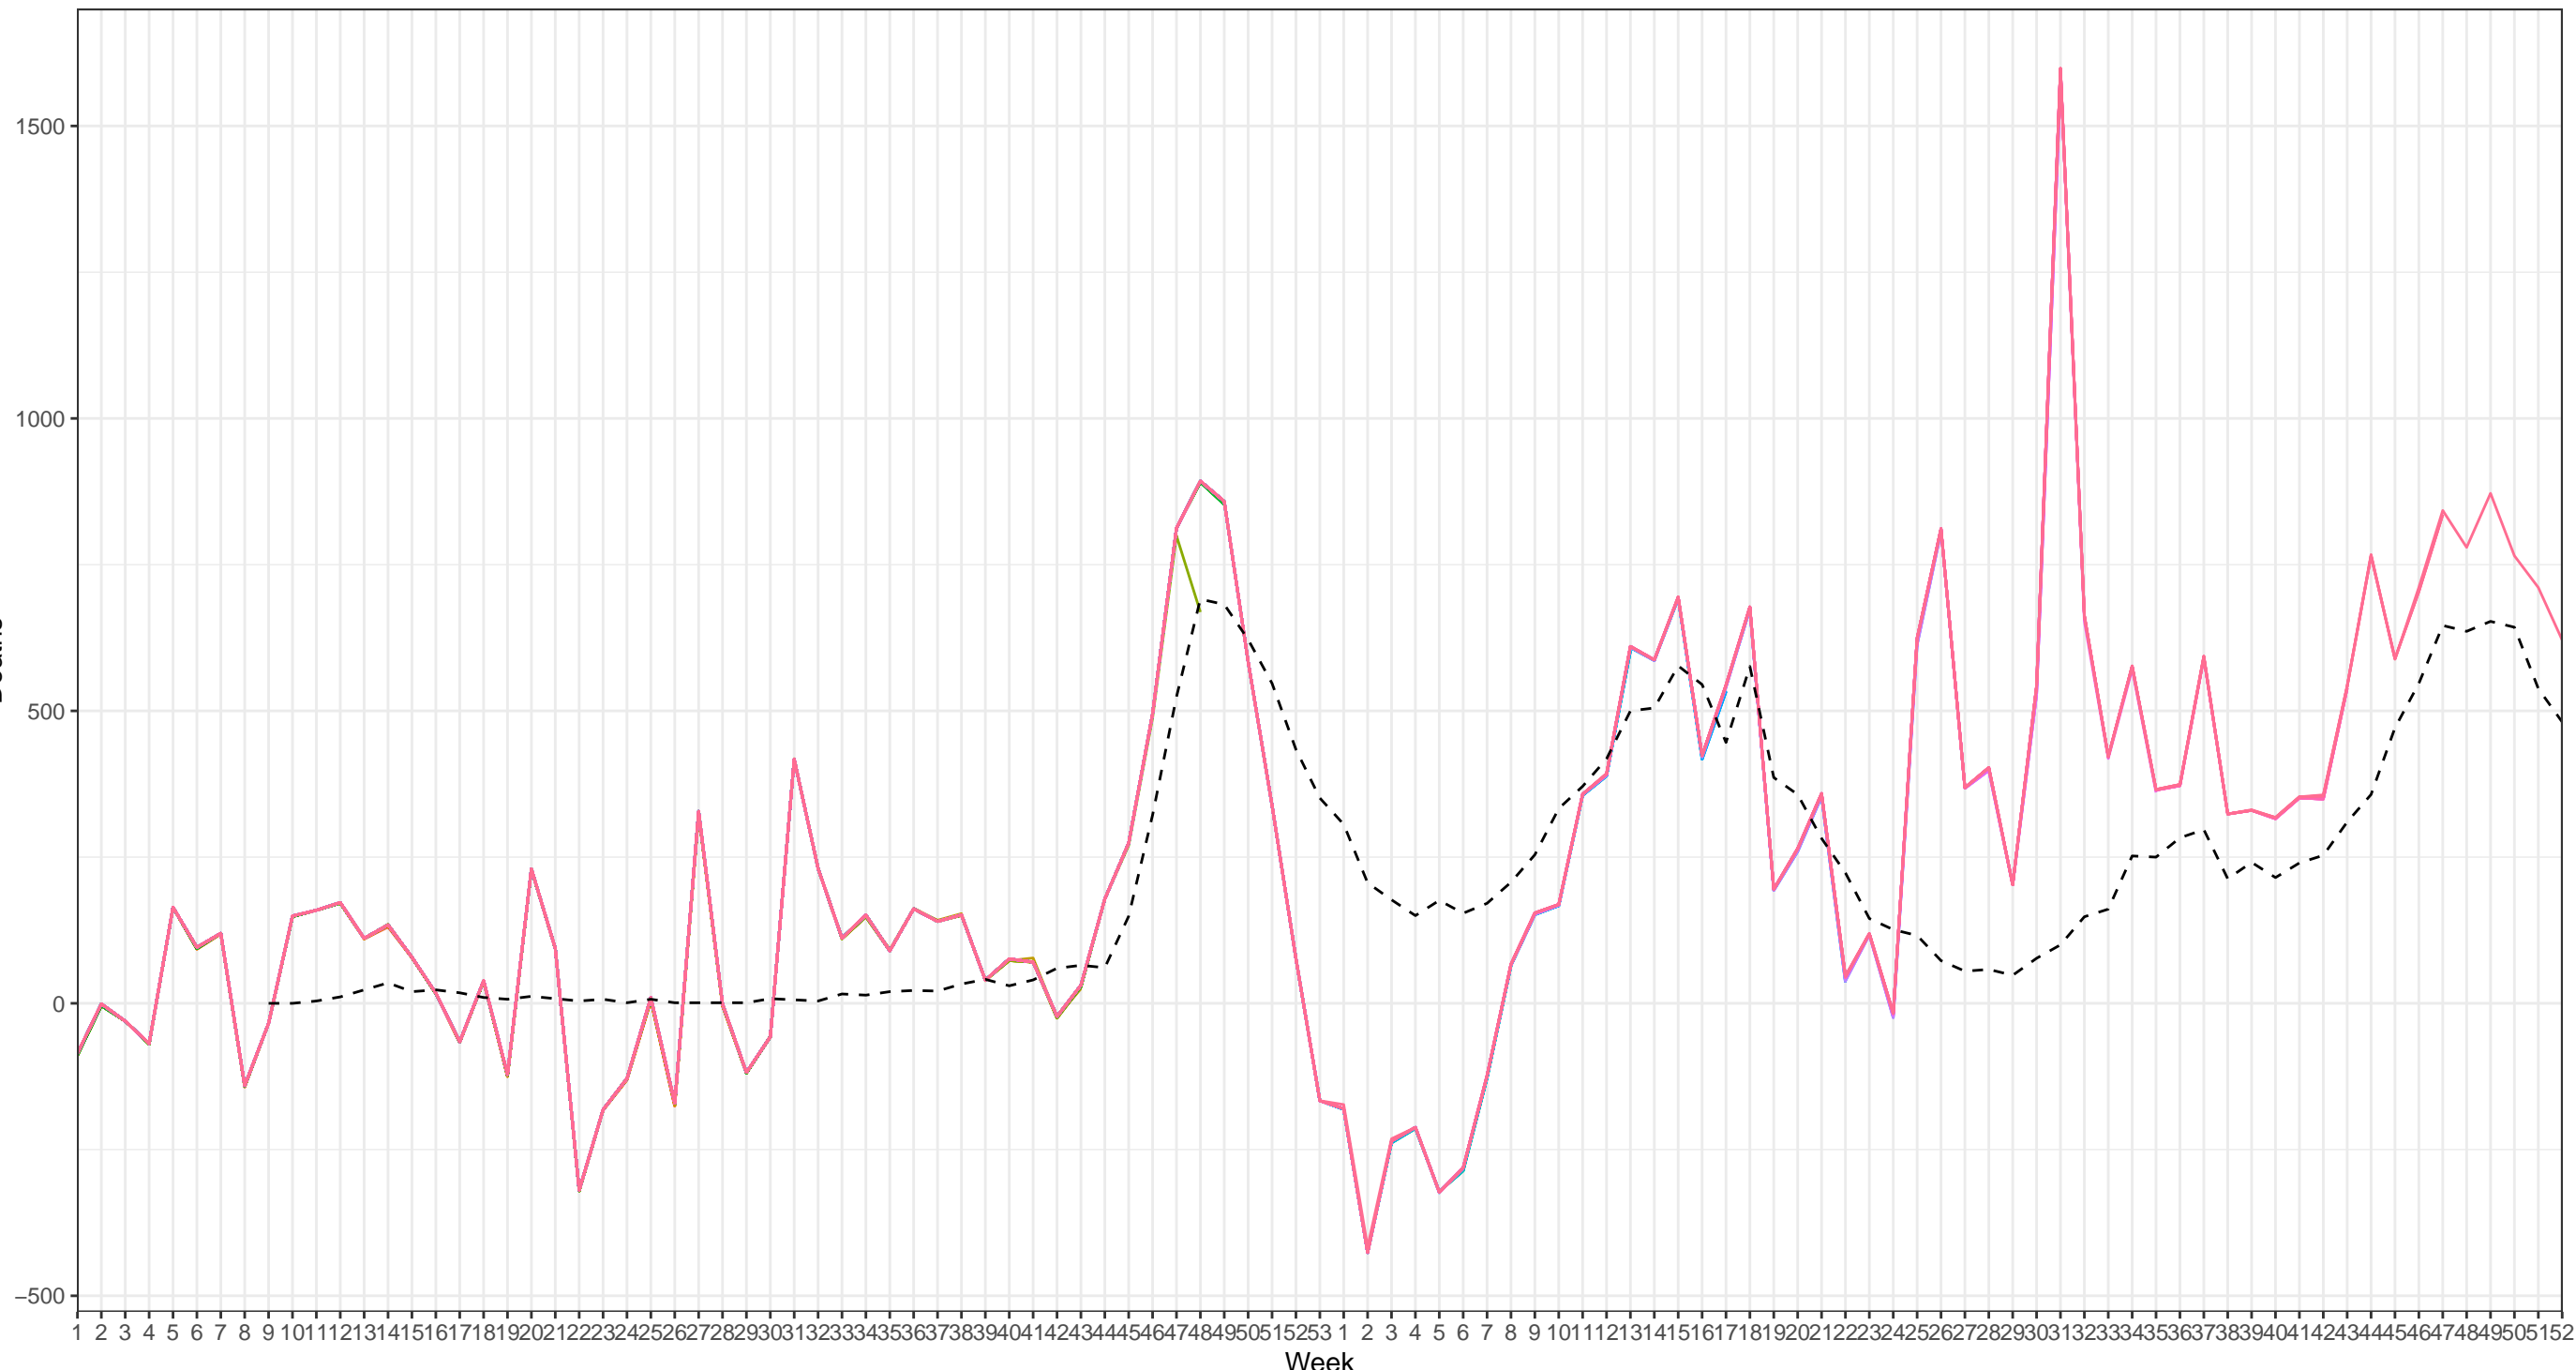

**Download date**

|            |            |            |
|------------|------------|------------|
| 2020-10-15 | 2021-02-26 | 2021-07-19 |
| 2020-10-22 | 2021-03-05 | 2021-08-03 |
| 2020-10-31 | 2021-03-12 | 2021-08-11 |
| 2020-11-05 | 2021-03-19 | 2021-08-17 |
| 2020-11-13 | 2021-03-25 | 2021-08-31 |
| 2020-11-15 | 2021-04-01 | 2021-09-10 |
| 2020-11-19 | 2021-04-09 | 2021-09-19 |
| 2020-11-27 | 2021-04-16 | 2021-09-23 |
| 2020-12-03 | 2021-04-24 | 2021-10-05 |
| 2020-12-10 | 2021-05-09 | 2021-10-11 |
| 2020-12-17 | 2021-05-14 | 2021-12-13 |
| 2020-12-22 | 2021-05-21 | 2021-12-22 |
| 2020-12-31 | 2021-05-28 | 2022-01-03 |
| 2021-01-08 | 2021-06-04 | 2022-01-06 |
| 2021-01-15 | 2021-06-11 | 2022-01-10 |
| 2021-01-22 | 2021-06-18 | 2022-01-17 |
| 2021-01-29 | 2021-06-25 | 2022-01-24 |
| 2021-02-05 | 2021-07-09 | 2022-01-31 |
| 2021-02-12 | 2021-07-16 | 2022-02-07 |
| 2021-02-19 |            | 2022-02-14 |

**Mortality type**

- Estimated excess mortality
- - Reported COVID-19 mortality

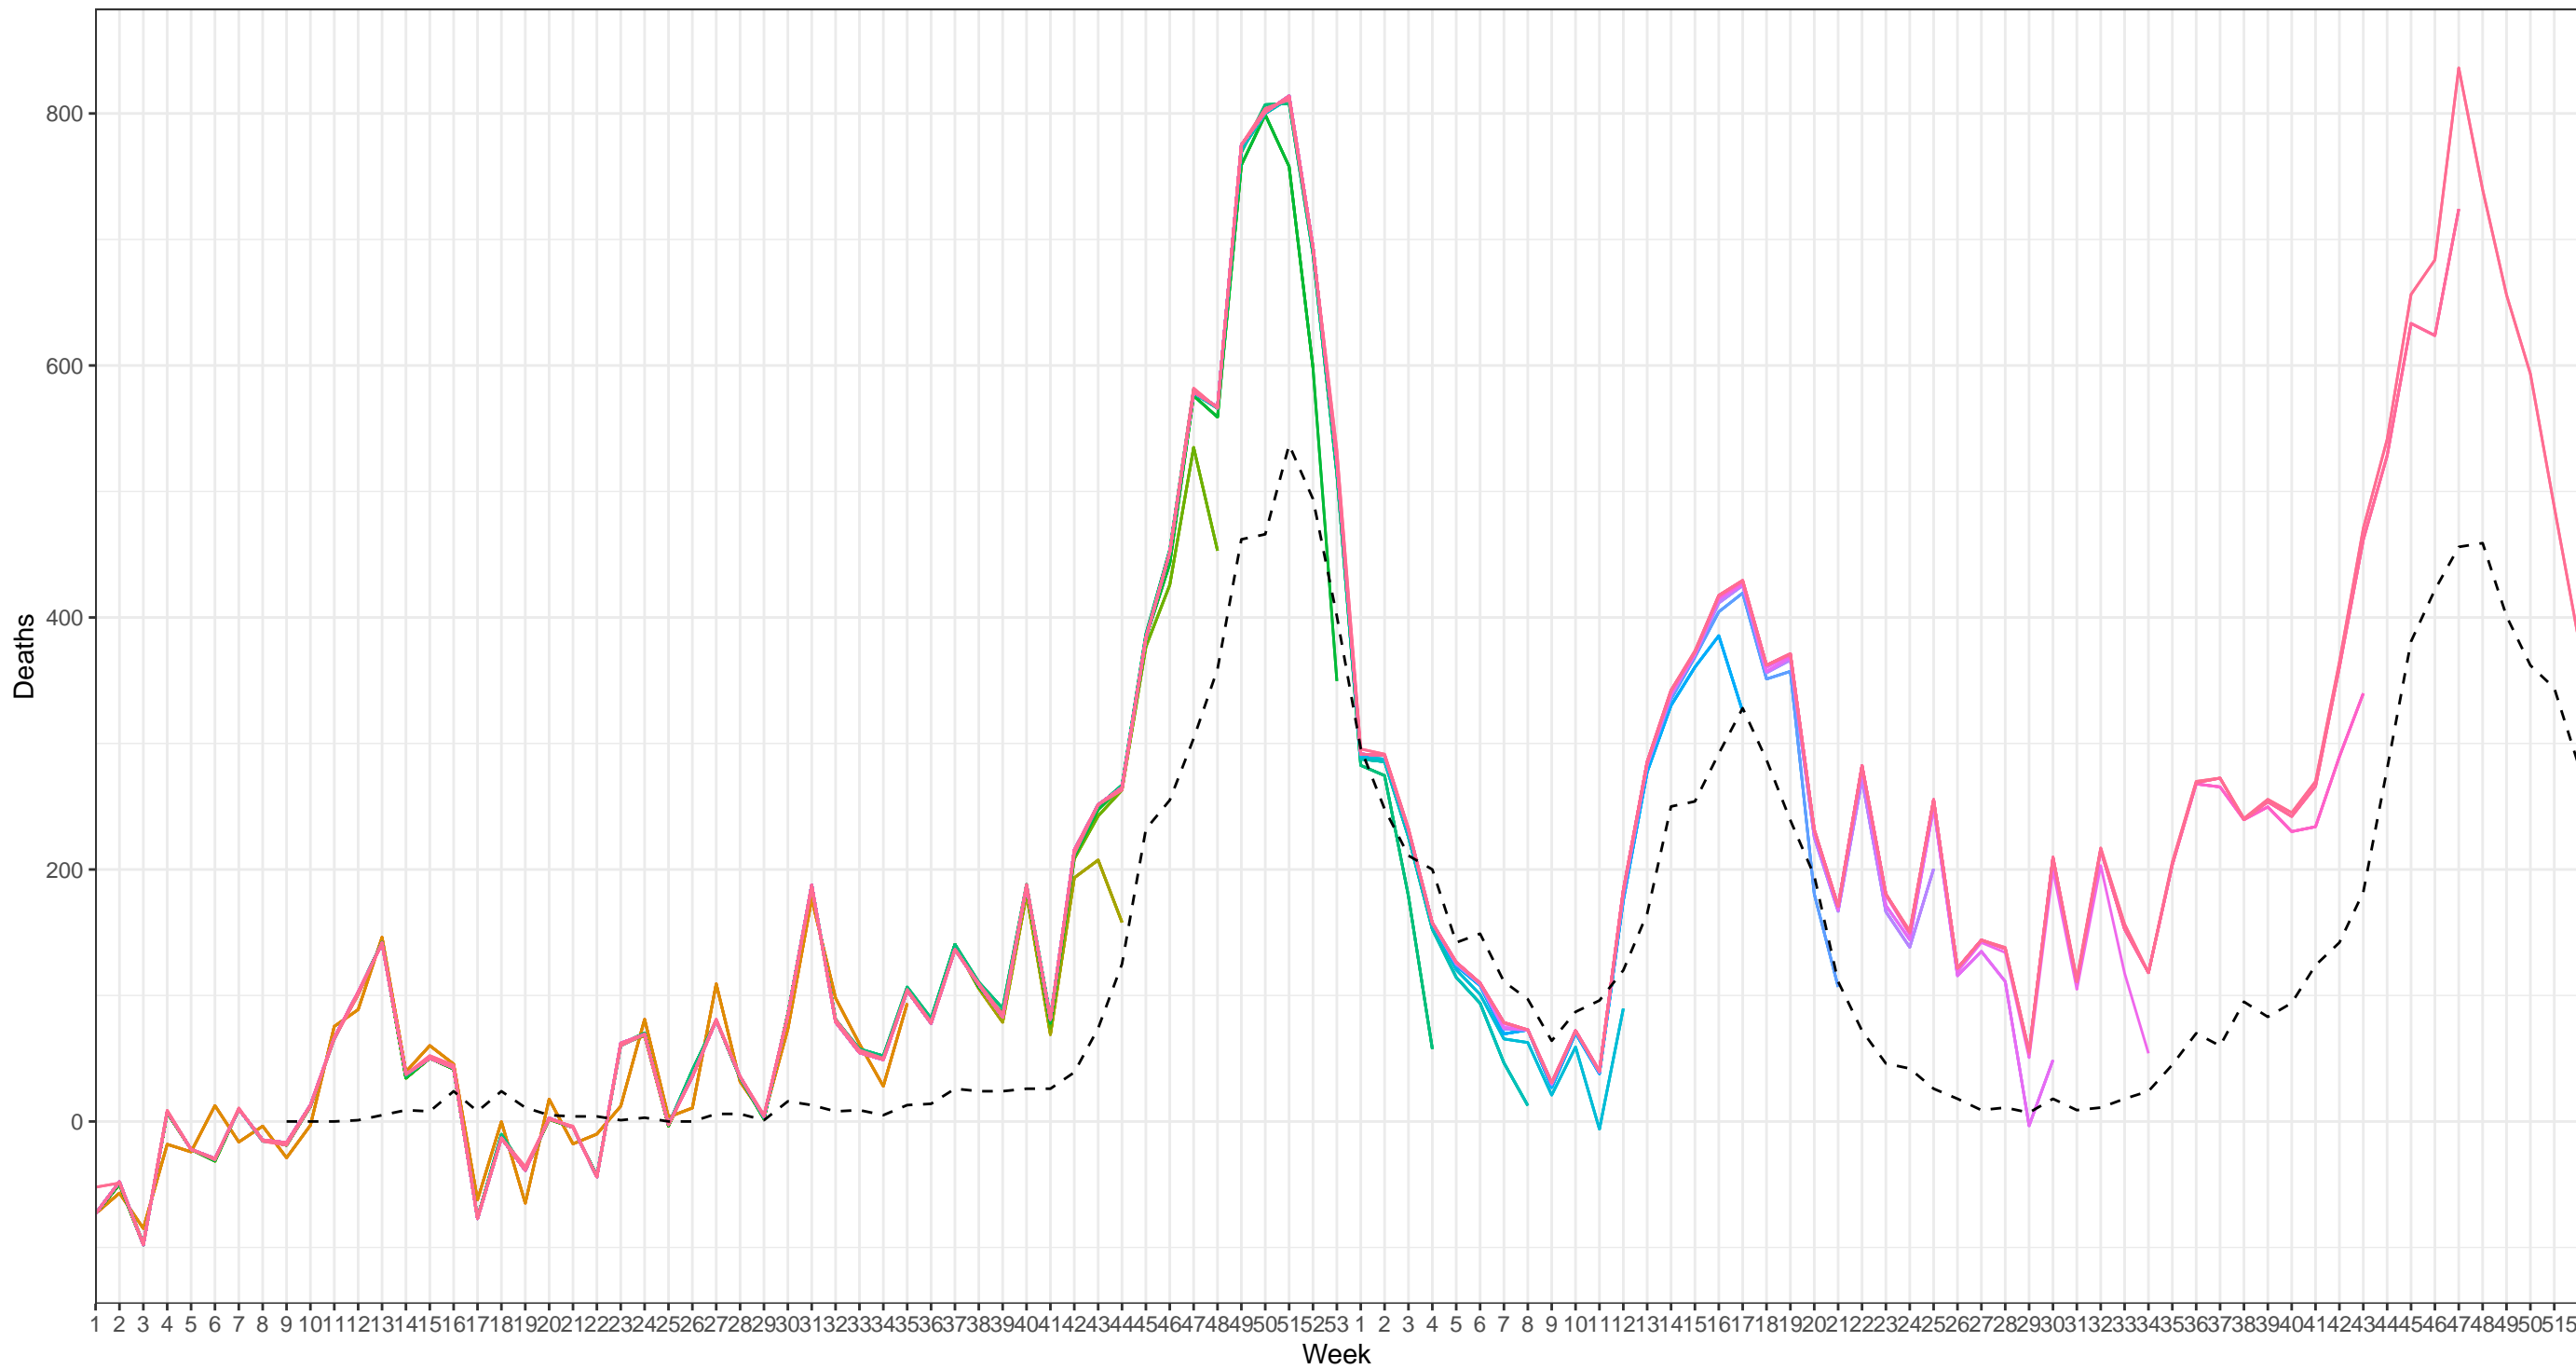

**Download date**

|            |            |            |
|------------|------------|------------|
| 2020-10-15 | 2021-02-26 | 2021-07-19 |
| 2020-10-22 | 2021-03-05 | 2021-08-03 |
| 2020-10-31 | 2021-03-12 | 2021-08-11 |
| 2020-11-05 | 2021-03-19 | 2021-08-17 |
| 2020-11-13 | 2021-03-25 | 2021-08-31 |
| 2020-11-15 | 2021-04-01 | 2021-09-10 |
| 2020-11-19 | 2021-04-09 | 2021-09-19 |
| 2020-11-27 | 2021-04-16 | 2021-09-23 |
| 2020-12-03 | 2021-04-24 | 2021-10-05 |
| 2020-12-10 | 2021-05-09 | 2021-10-11 |
| 2020-12-17 | 2021-05-14 | 2021-12-13 |
| 2020-12-22 | 2021-05-21 | 2021-12-22 |
| 2020-12-31 | 2021-05-28 | 2022-01-03 |
| 2021-01-08 | 2021-06-04 | 2022-01-06 |
| 2021-01-15 | 2021-06-11 | 2022-01-10 |
| 2021-01-22 | 2021-06-18 | 2022-01-17 |
| 2021-01-29 | 2021-06-25 | 2022-01-24 |
| 2021-02-05 | 2021-07-09 | 2022-01-31 |
| 2021-02-12 | 2021-07-16 | 2022-02-07 |
| 2021-02-19 |            | 2022-02-14 |

**Mortality type**

- Estimated excess mortality
- - Reported COVID-19 mortality

# Hungary

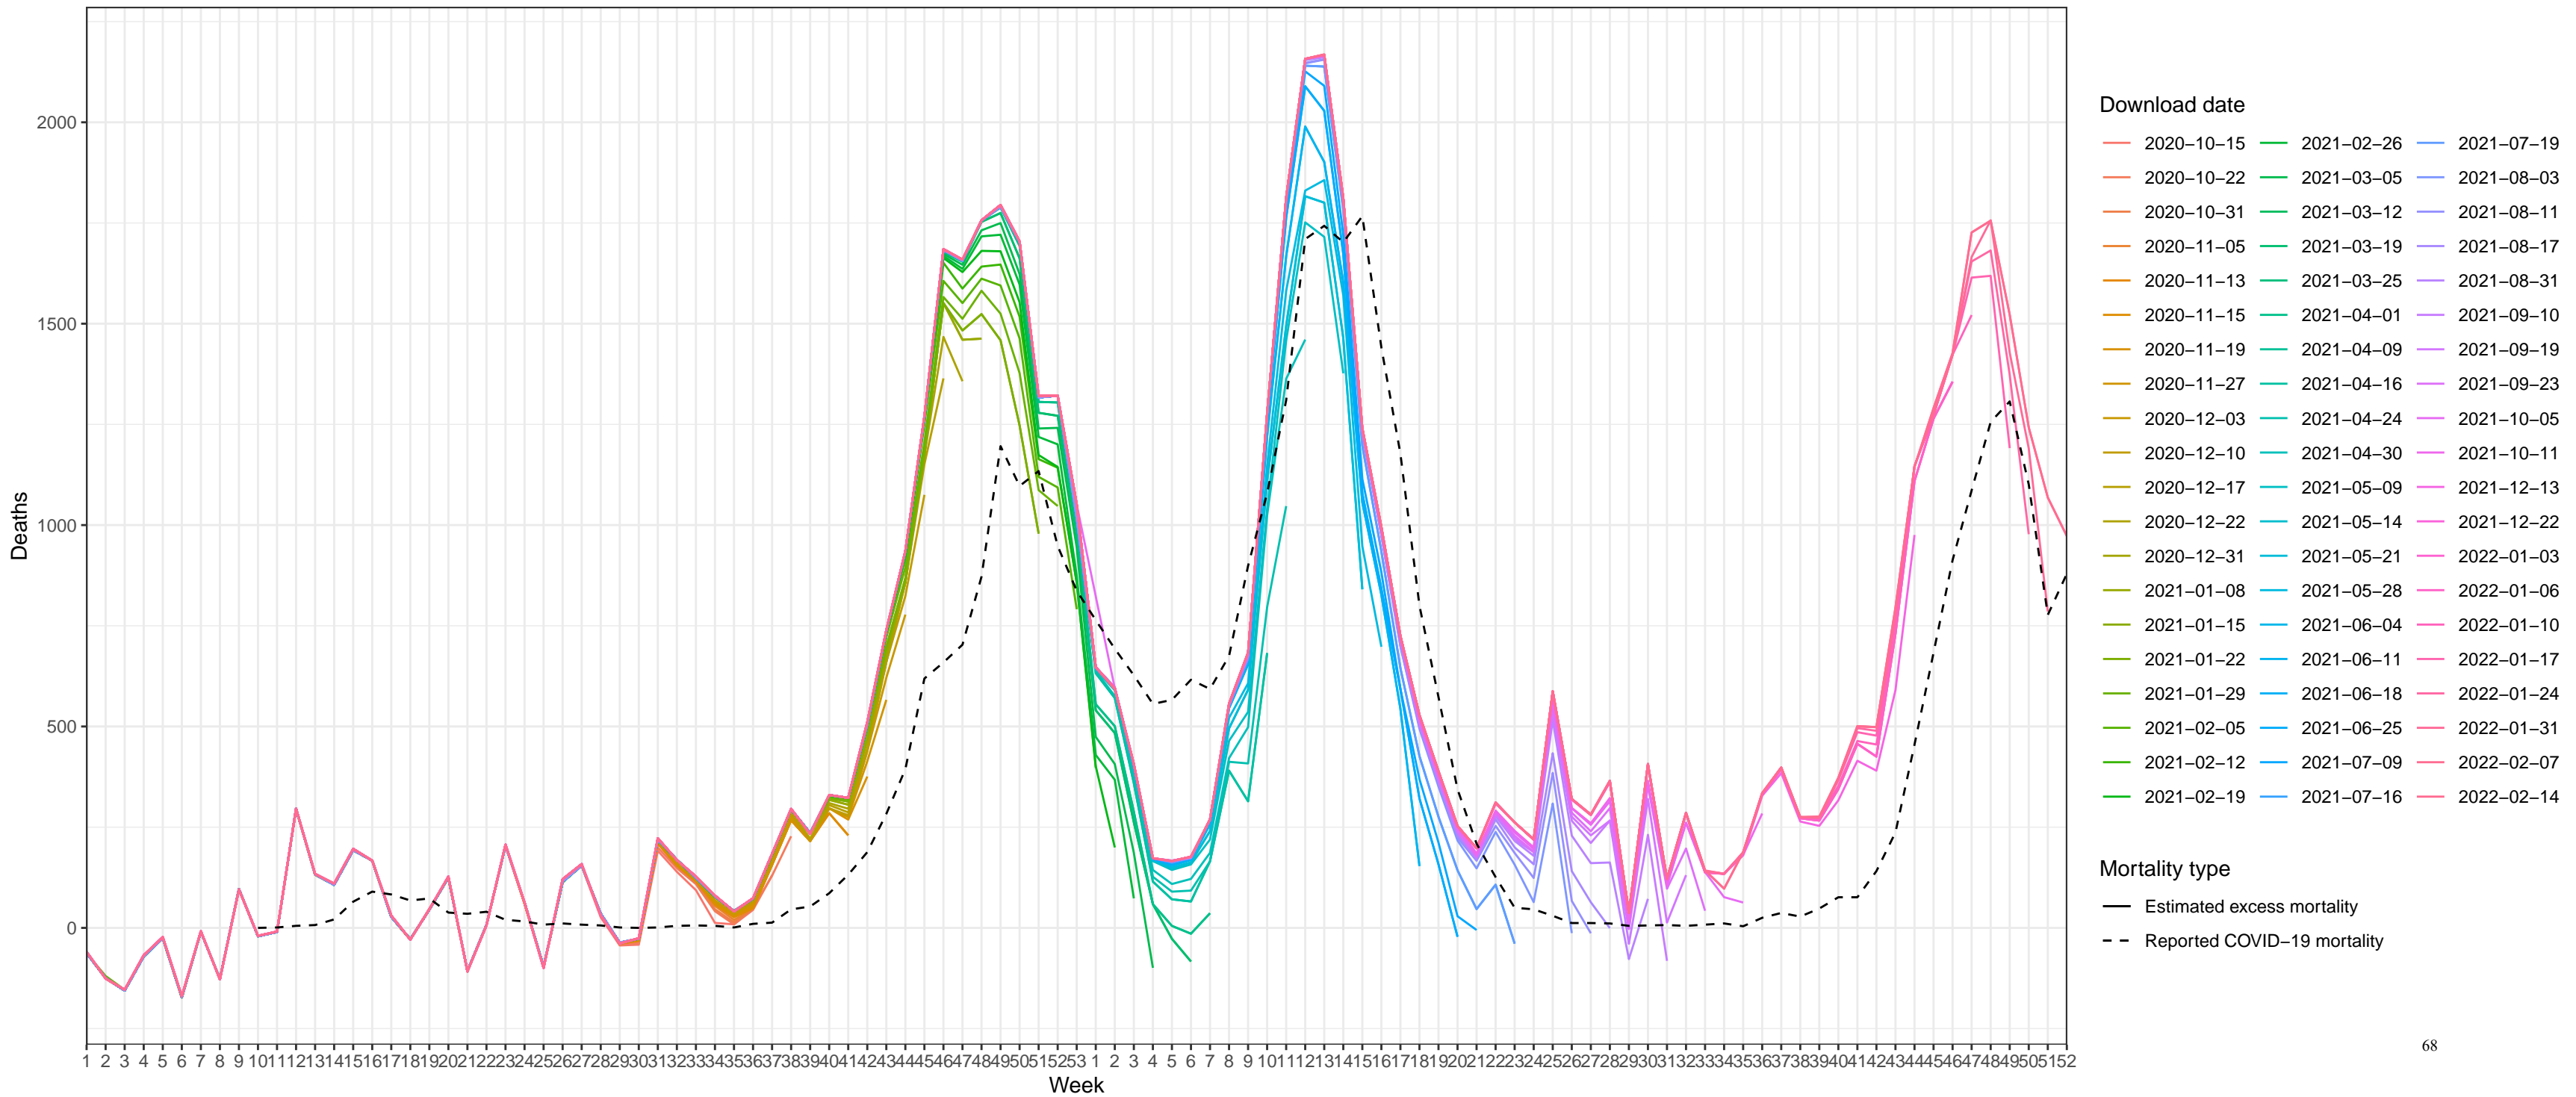

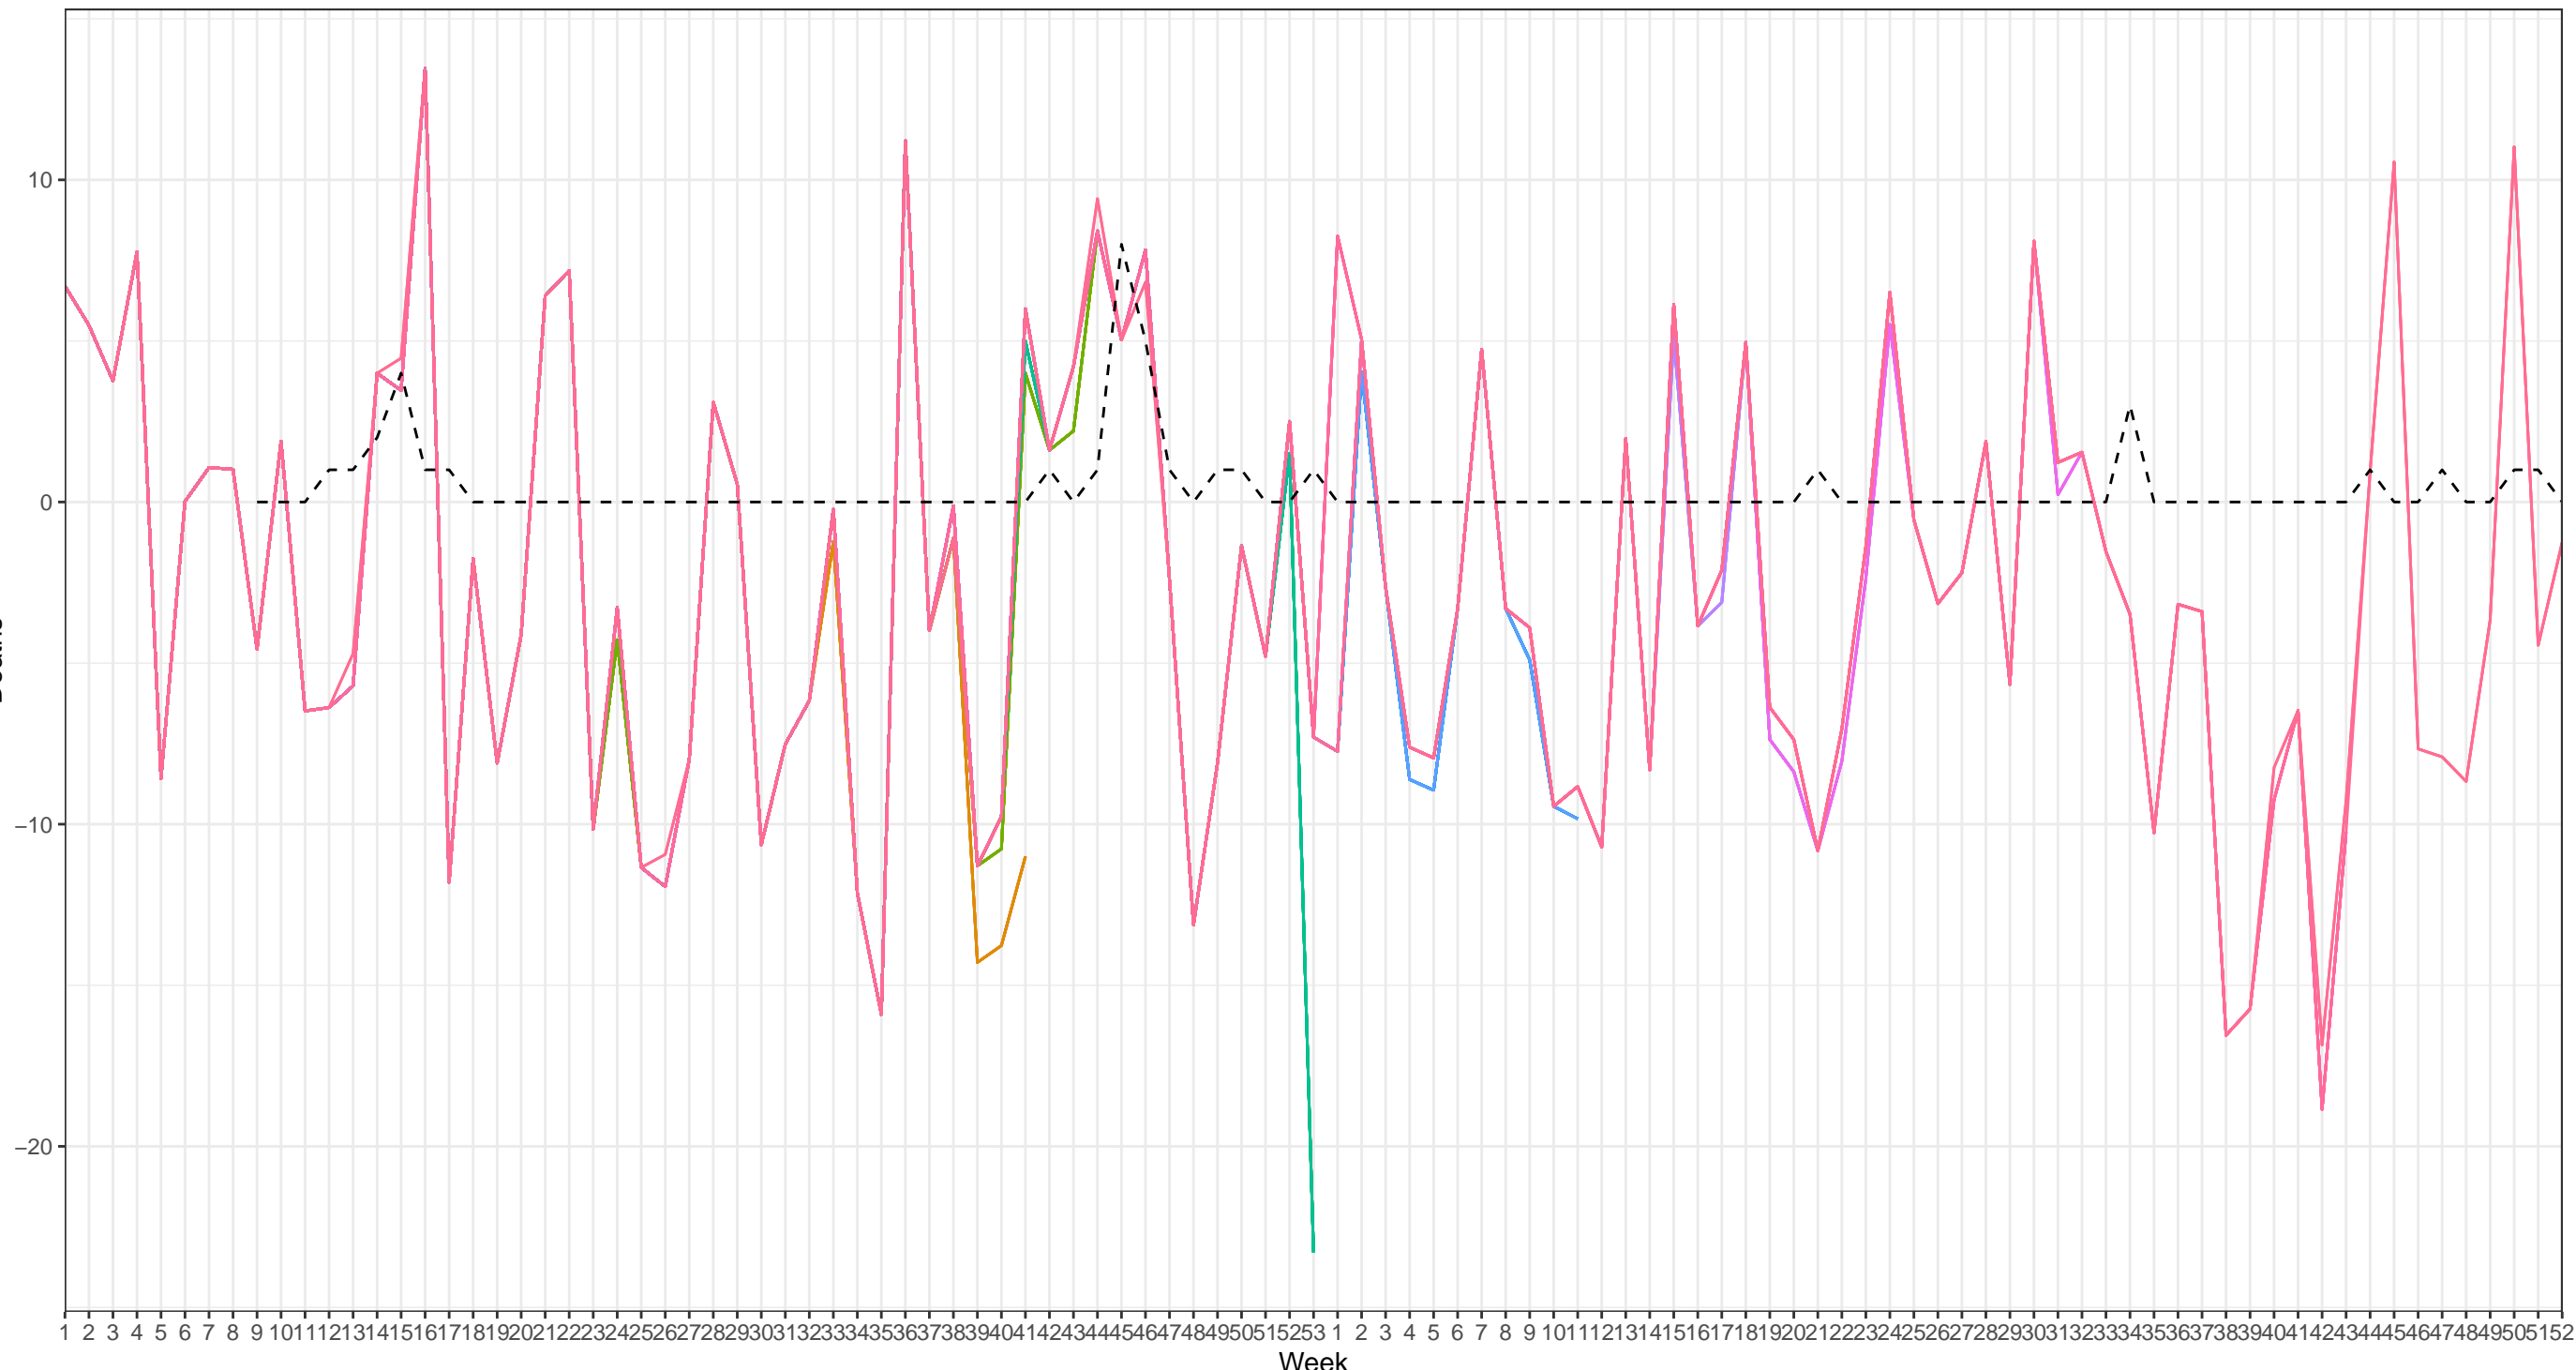

Download date

- 2020-10-15
- 2020-10-22
- 2020-10-31
- 2020-11-05
- 2020-11-13
- 2020-11-15
- 2020-11-19
- 2020-11-27
- 2020-12-03
- 2020-12-10
- 2020-12-17
- 2020-12-22
- 2020-12-31
- 2021-01-08
- 2021-01-15
- 2021-01-22
- 2021-01-29
- 2021-02-05
- 2021-02-12
- 2021-02-19
- 2021-02-26
- 2021-03-05
- 2021-03-12
- 2021-03-19
- 2021-03-25
- 2021-04-01
- 2021-04-09
- 2021-04-16
- 2021-04-24
- 2021-05-09
- 2021-05-14
- 2021-05-21
- 2021-05-28
- 2021-06-04
- 2021-06-11
- 2021-06-18
- 2021-06-25
- 2021-07-09
- 2021-07-16
- 2021-07-19
- 2021-08-03
- 2021-08-11
- 2021-08-17
- 2021-08-31
- 2021-09-10
- 2021-09-19
- 2021-09-23
- 2021-10-05
- 2021-10-11
- 2021-12-13
- 2021-12-22
- 2022-01-03
- 2022-01-06
- 2022-01-10
- 2022-01-17
- 2022-01-24
- 2022-01-31
- 2022-02-07
- 2022-02-14

Mortality type

- Estimated excess mortality
- Reported COVID-19 mortality

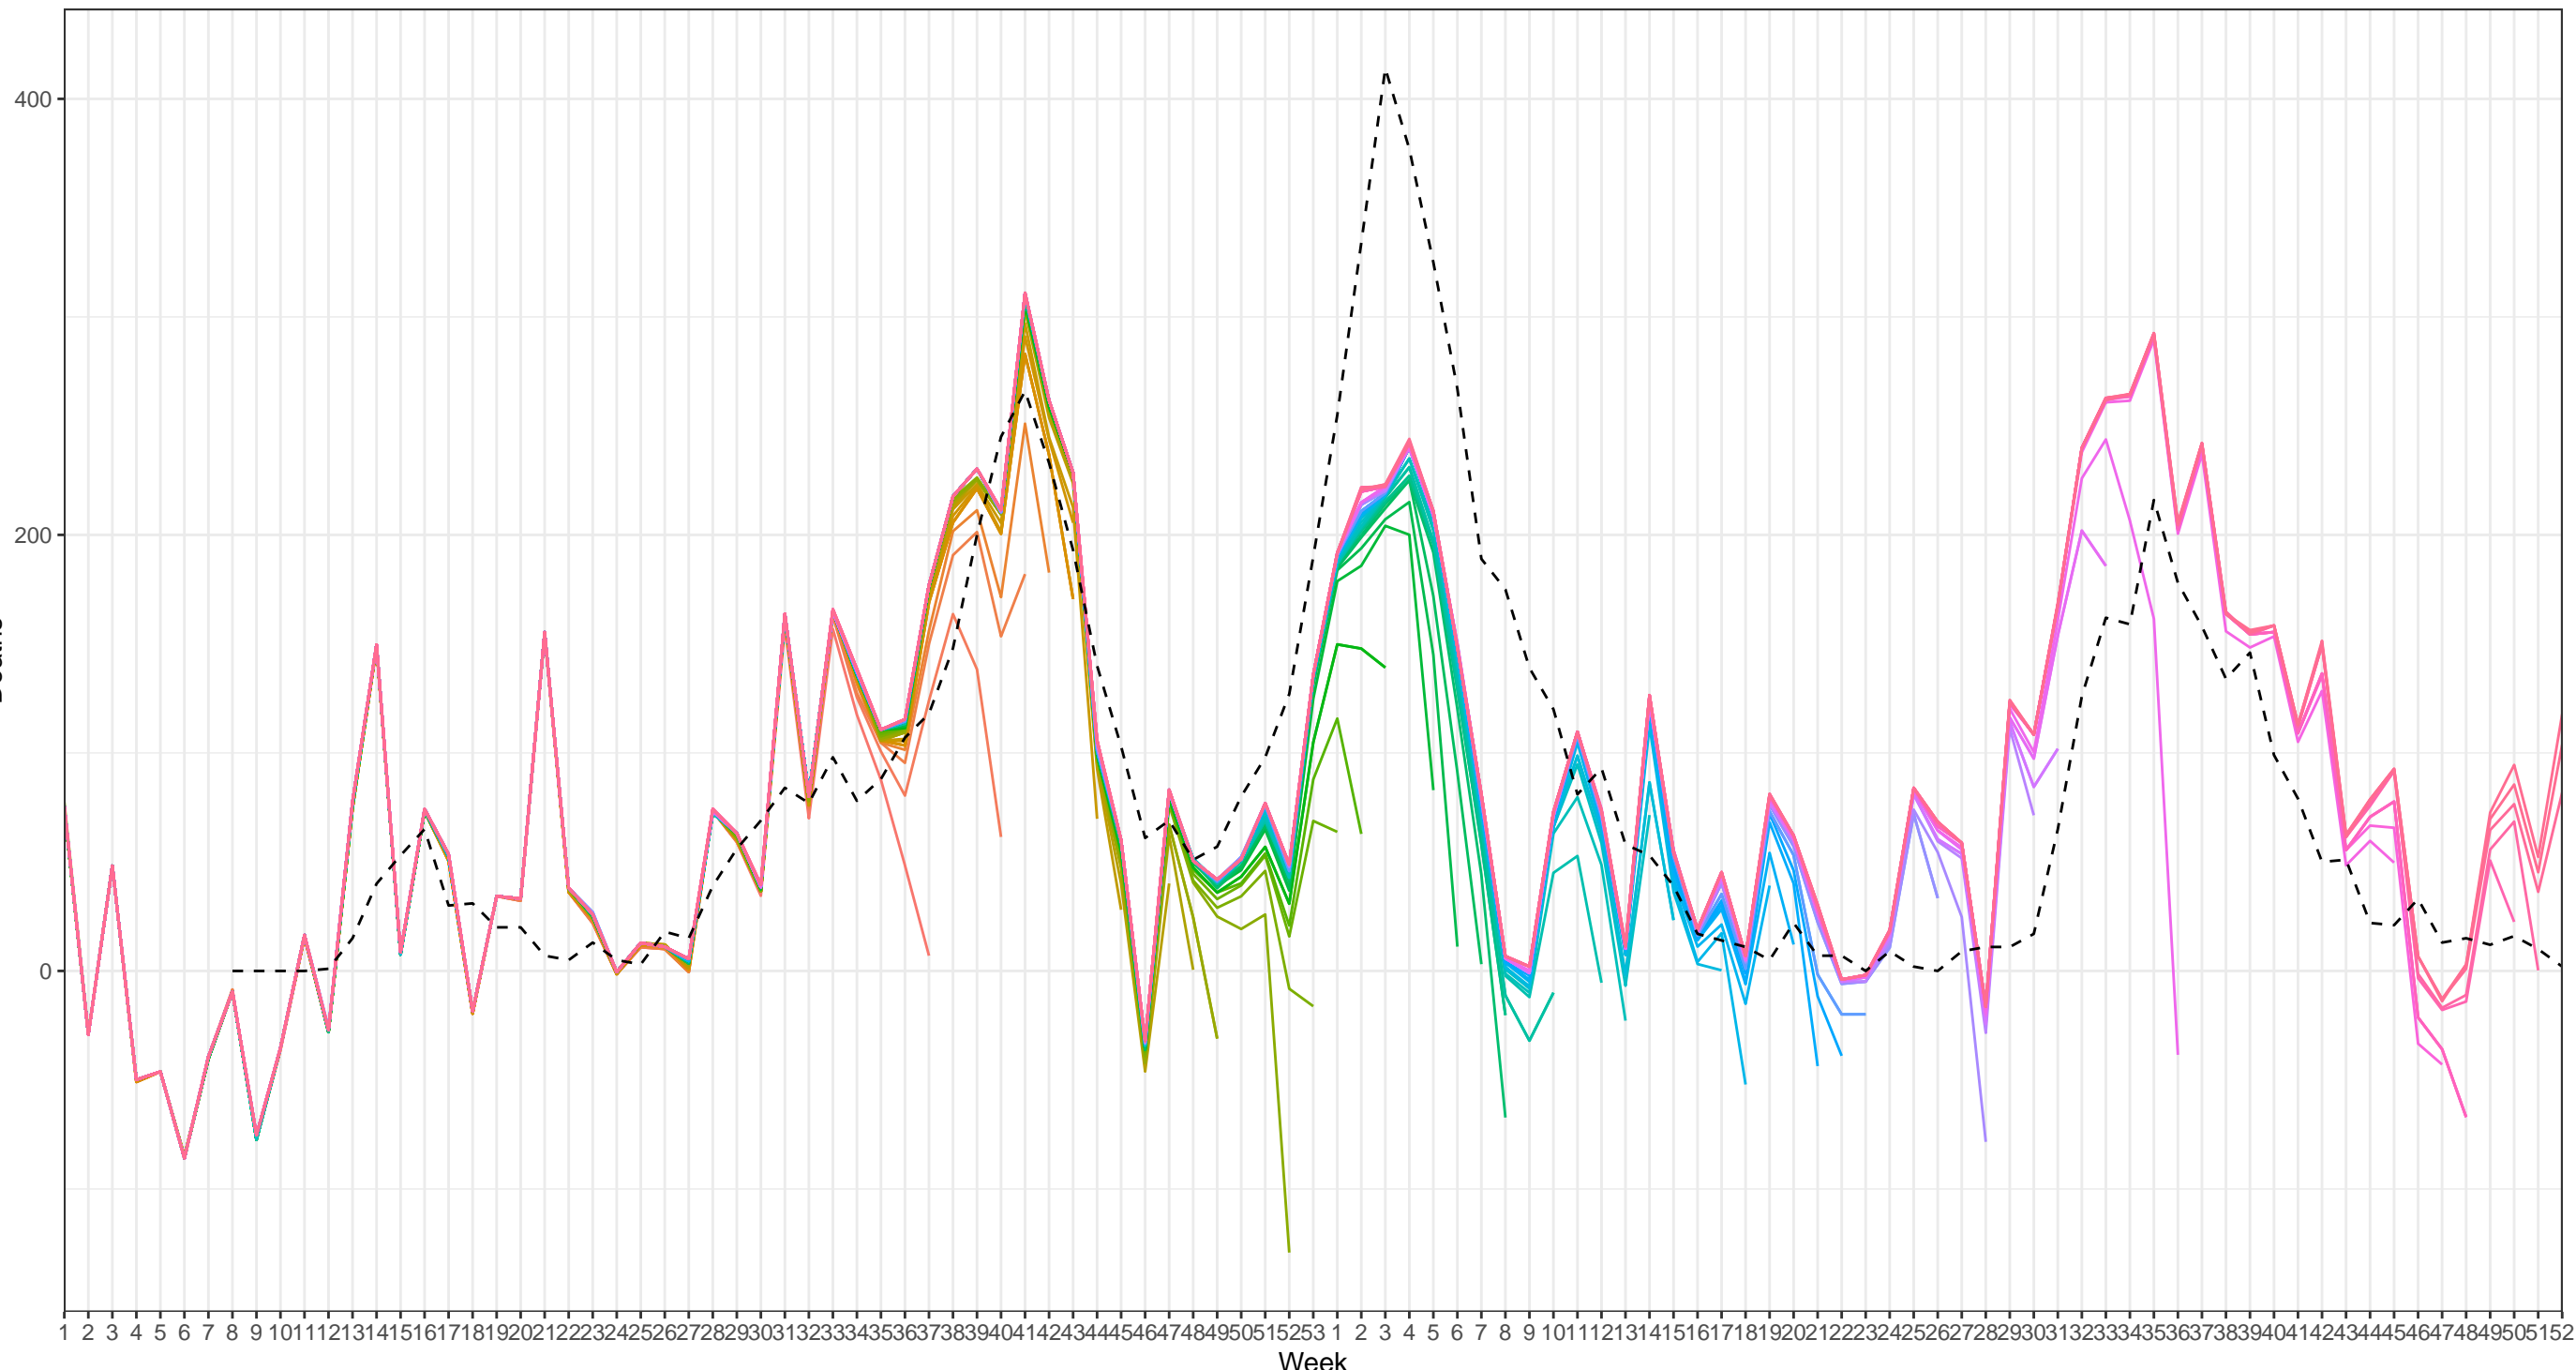

**Download date**

|            |            |            |
|------------|------------|------------|
| 2020-10-15 | 2021-02-26 | 2021-07-19 |
| 2020-10-22 | 2021-03-05 | 2021-08-03 |
| 2020-10-31 | 2021-03-12 | 2021-08-11 |
| 2020-11-05 | 2021-03-19 | 2021-08-17 |
| 2020-11-13 | 2021-03-25 | 2021-08-31 |
| 2020-11-15 | 2021-04-01 | 2021-09-10 |
| 2020-11-19 | 2021-04-09 | 2021-09-19 |
| 2020-11-27 | 2021-04-16 | 2021-09-23 |
| 2020-12-03 | 2021-04-24 | 2021-10-05 |
| 2020-12-10 | 2021-05-09 | 2021-10-11 |
| 2020-12-17 | 2021-05-14 | 2021-12-13 |
| 2020-12-22 | 2021-05-21 | 2021-12-22 |
| 2020-12-31 | 2021-05-28 | 2022-01-03 |
| 2021-01-08 | 2021-06-04 | 2022-01-06 |
| 2021-01-15 | 2021-06-11 | 2022-01-10 |
| 2021-01-22 | 2021-06-18 | 2022-01-17 |
| 2021-01-29 | 2021-06-25 | 2022-01-24 |
| 2021-02-05 | 2021-07-09 | 2022-01-31 |
| 2021-02-12 | 2021-07-16 | 2022-02-07 |
| 2021-02-19 |            | 2022-02-14 |

**Mortality type**

- Estimated excess mortality
- - Reported COVID-19 mortality

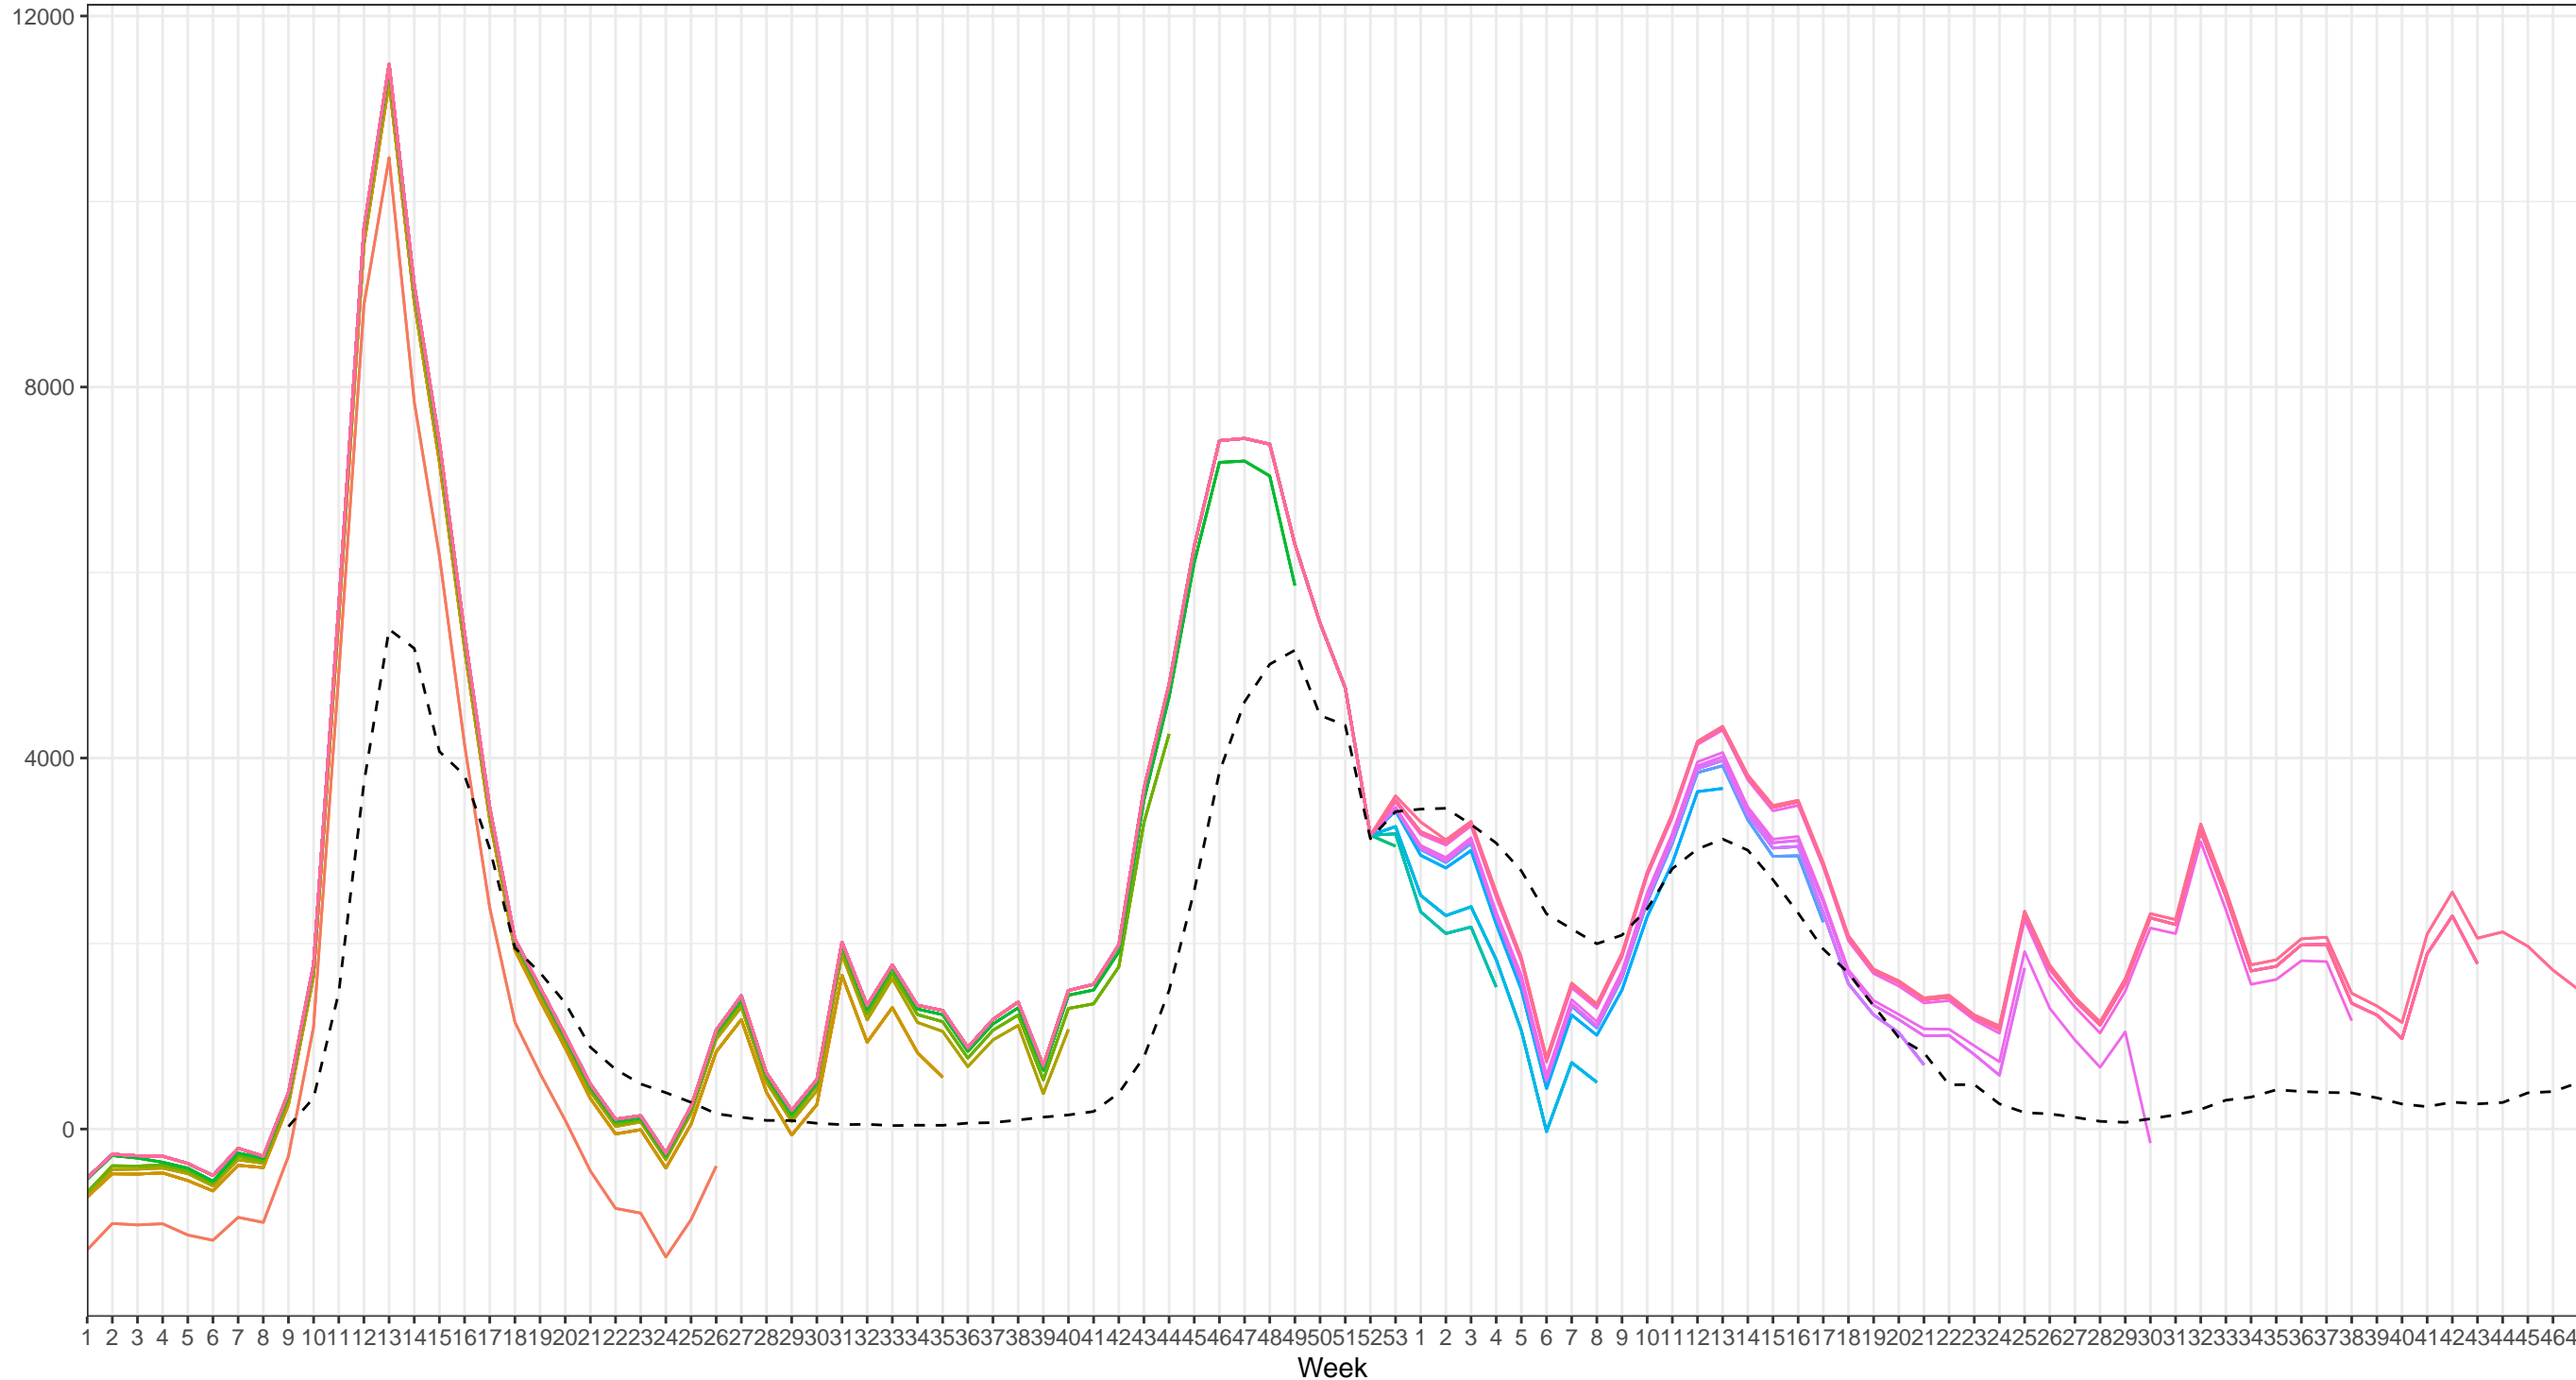

**Download date**

|            |            |            |
|------------|------------|------------|
| 2020-10-15 | 2021-02-26 | 2021-07-19 |
| 2020-10-22 | 2021-03-05 | 2021-08-03 |
| 2020-10-31 | 2021-03-12 | 2021-08-11 |
| 2020-11-05 | 2021-03-19 | 2021-08-17 |
| 2020-11-13 | 2021-03-25 | 2021-08-31 |
| 2020-11-15 | 2021-04-01 | 2021-09-10 |
| 2020-11-19 | 2021-04-09 | 2021-09-19 |
| 2020-11-27 | 2021-04-16 | 2021-09-23 |
| 2020-12-03 | 2021-04-24 | 2021-10-05 |
| 2020-12-10 | 2021-05-09 | 2021-10-11 |
| 2020-12-17 | 2021-05-14 | 2021-12-13 |
| 2020-12-22 | 2021-05-21 | 2021-12-22 |
| 2020-12-31 | 2021-05-28 | 2022-01-03 |
| 2021-01-08 | 2021-06-04 | 2022-01-06 |
| 2021-01-15 | 2021-06-11 | 2022-01-10 |
| 2021-01-22 | 2021-06-18 | 2022-01-17 |
| 2021-01-29 | 2021-06-25 | 2022-01-24 |
| 2021-02-05 | 2021-07-09 | 2022-01-31 |
| 2021-02-12 | 2021-07-16 | 2022-02-07 |
| 2021-02-19 |            | 2022-02-14 |

**Mortality type**

- Estimated excess mortality
- - Reported COVID-19 mortality



# South Korea

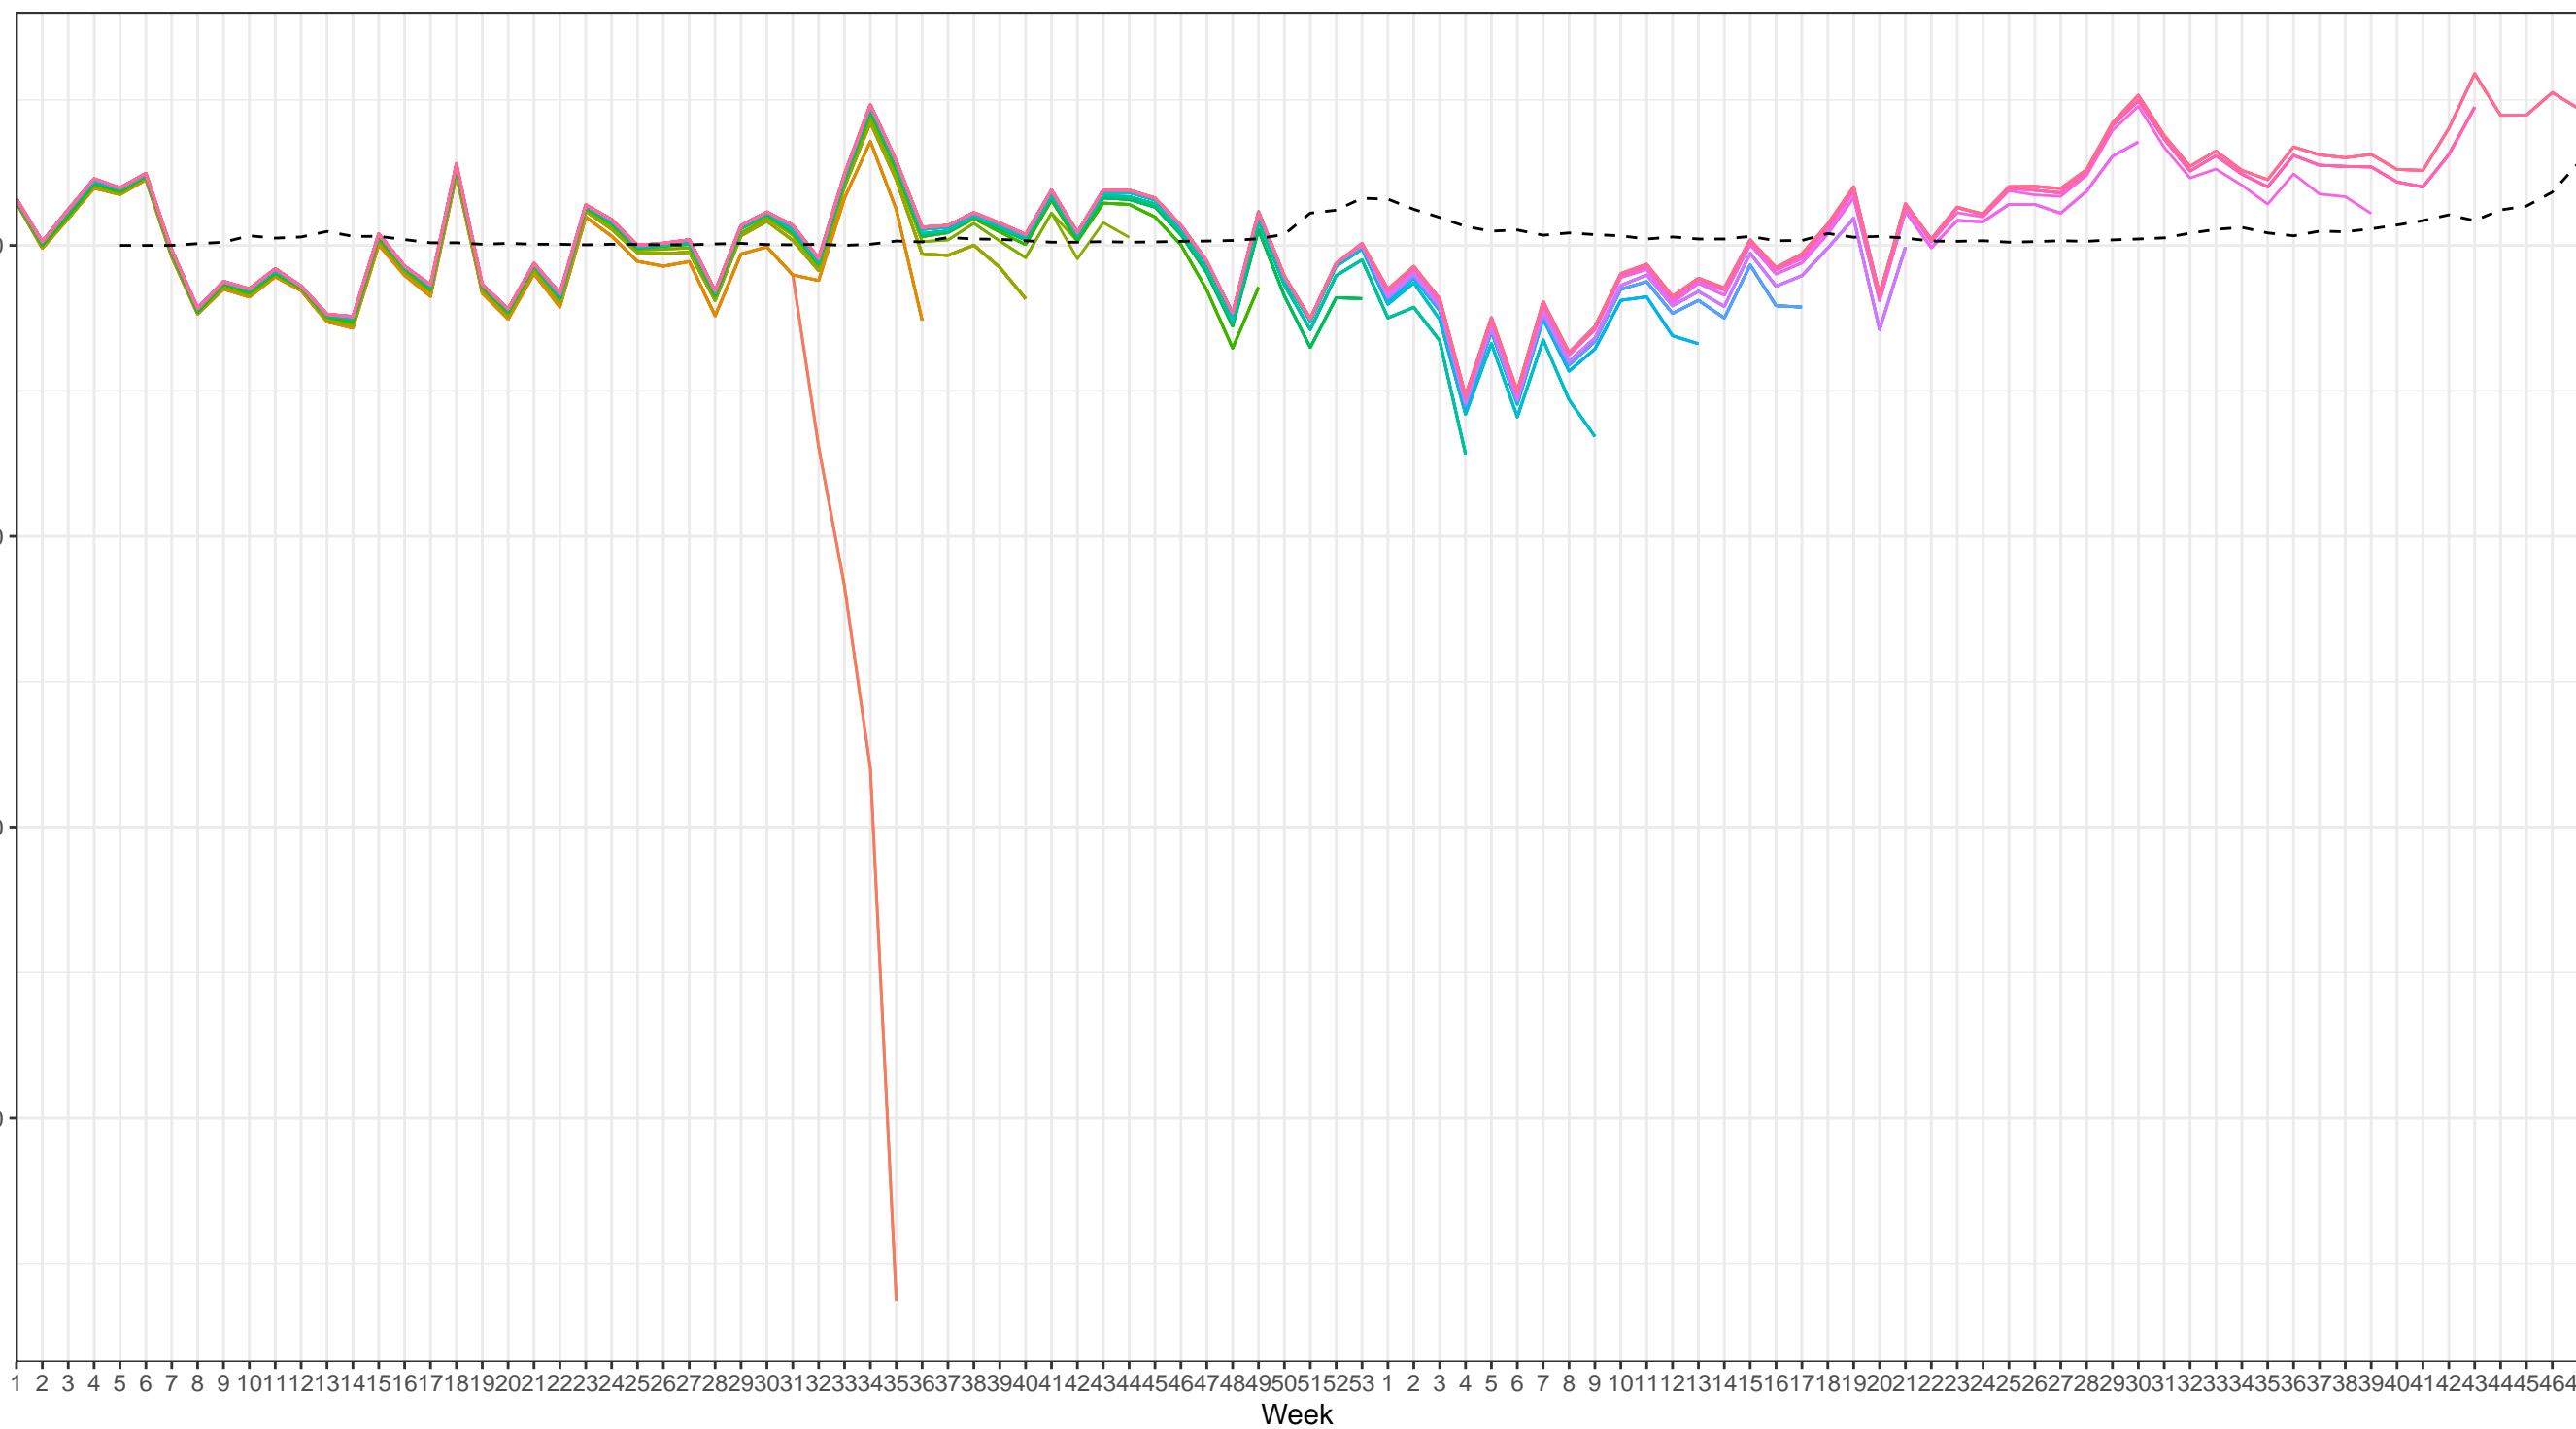

**Download date**

|            |            |            |
|------------|------------|------------|
| 2020-10-15 | 2021-02-26 | 2021-07-19 |
| 2020-10-22 | 2021-03-05 | 2021-08-03 |
| 2020-10-31 | 2021-03-12 | 2021-08-11 |
| 2020-11-05 | 2021-03-19 | 2021-08-17 |
| 2020-11-13 | 2021-03-25 | 2021-08-31 |
| 2020-11-15 | 2021-04-01 | 2021-09-10 |
| 2020-11-19 | 2021-04-09 | 2021-09-19 |
| 2020-11-27 | 2021-04-16 | 2021-09-23 |
| 2020-12-03 | 2021-04-24 | 2021-10-05 |
| 2020-12-10 | 2021-05-09 | 2021-10-11 |
| 2020-12-17 | 2021-05-14 | 2021-12-13 |
| 2020-12-22 | 2021-05-21 | 2021-12-22 |
| 2020-12-31 | 2021-05-28 | 2022-01-03 |
| 2021-01-08 | 2021-06-04 | 2022-01-06 |
| 2021-01-15 | 2021-06-11 | 2022-01-10 |
| 2021-01-22 | 2021-06-18 | 2022-01-17 |
| 2021-01-29 | 2021-06-25 | 2022-01-24 |
| 2021-02-05 | 2021-07-09 | 2022-01-31 |
| 2021-02-12 | 2021-07-16 | 2022-02-07 |
| 2021-02-19 |            | 2022-02-14 |

**Mortality type**

- Estimated excess mortality
- - Reported COVID-19 mortality

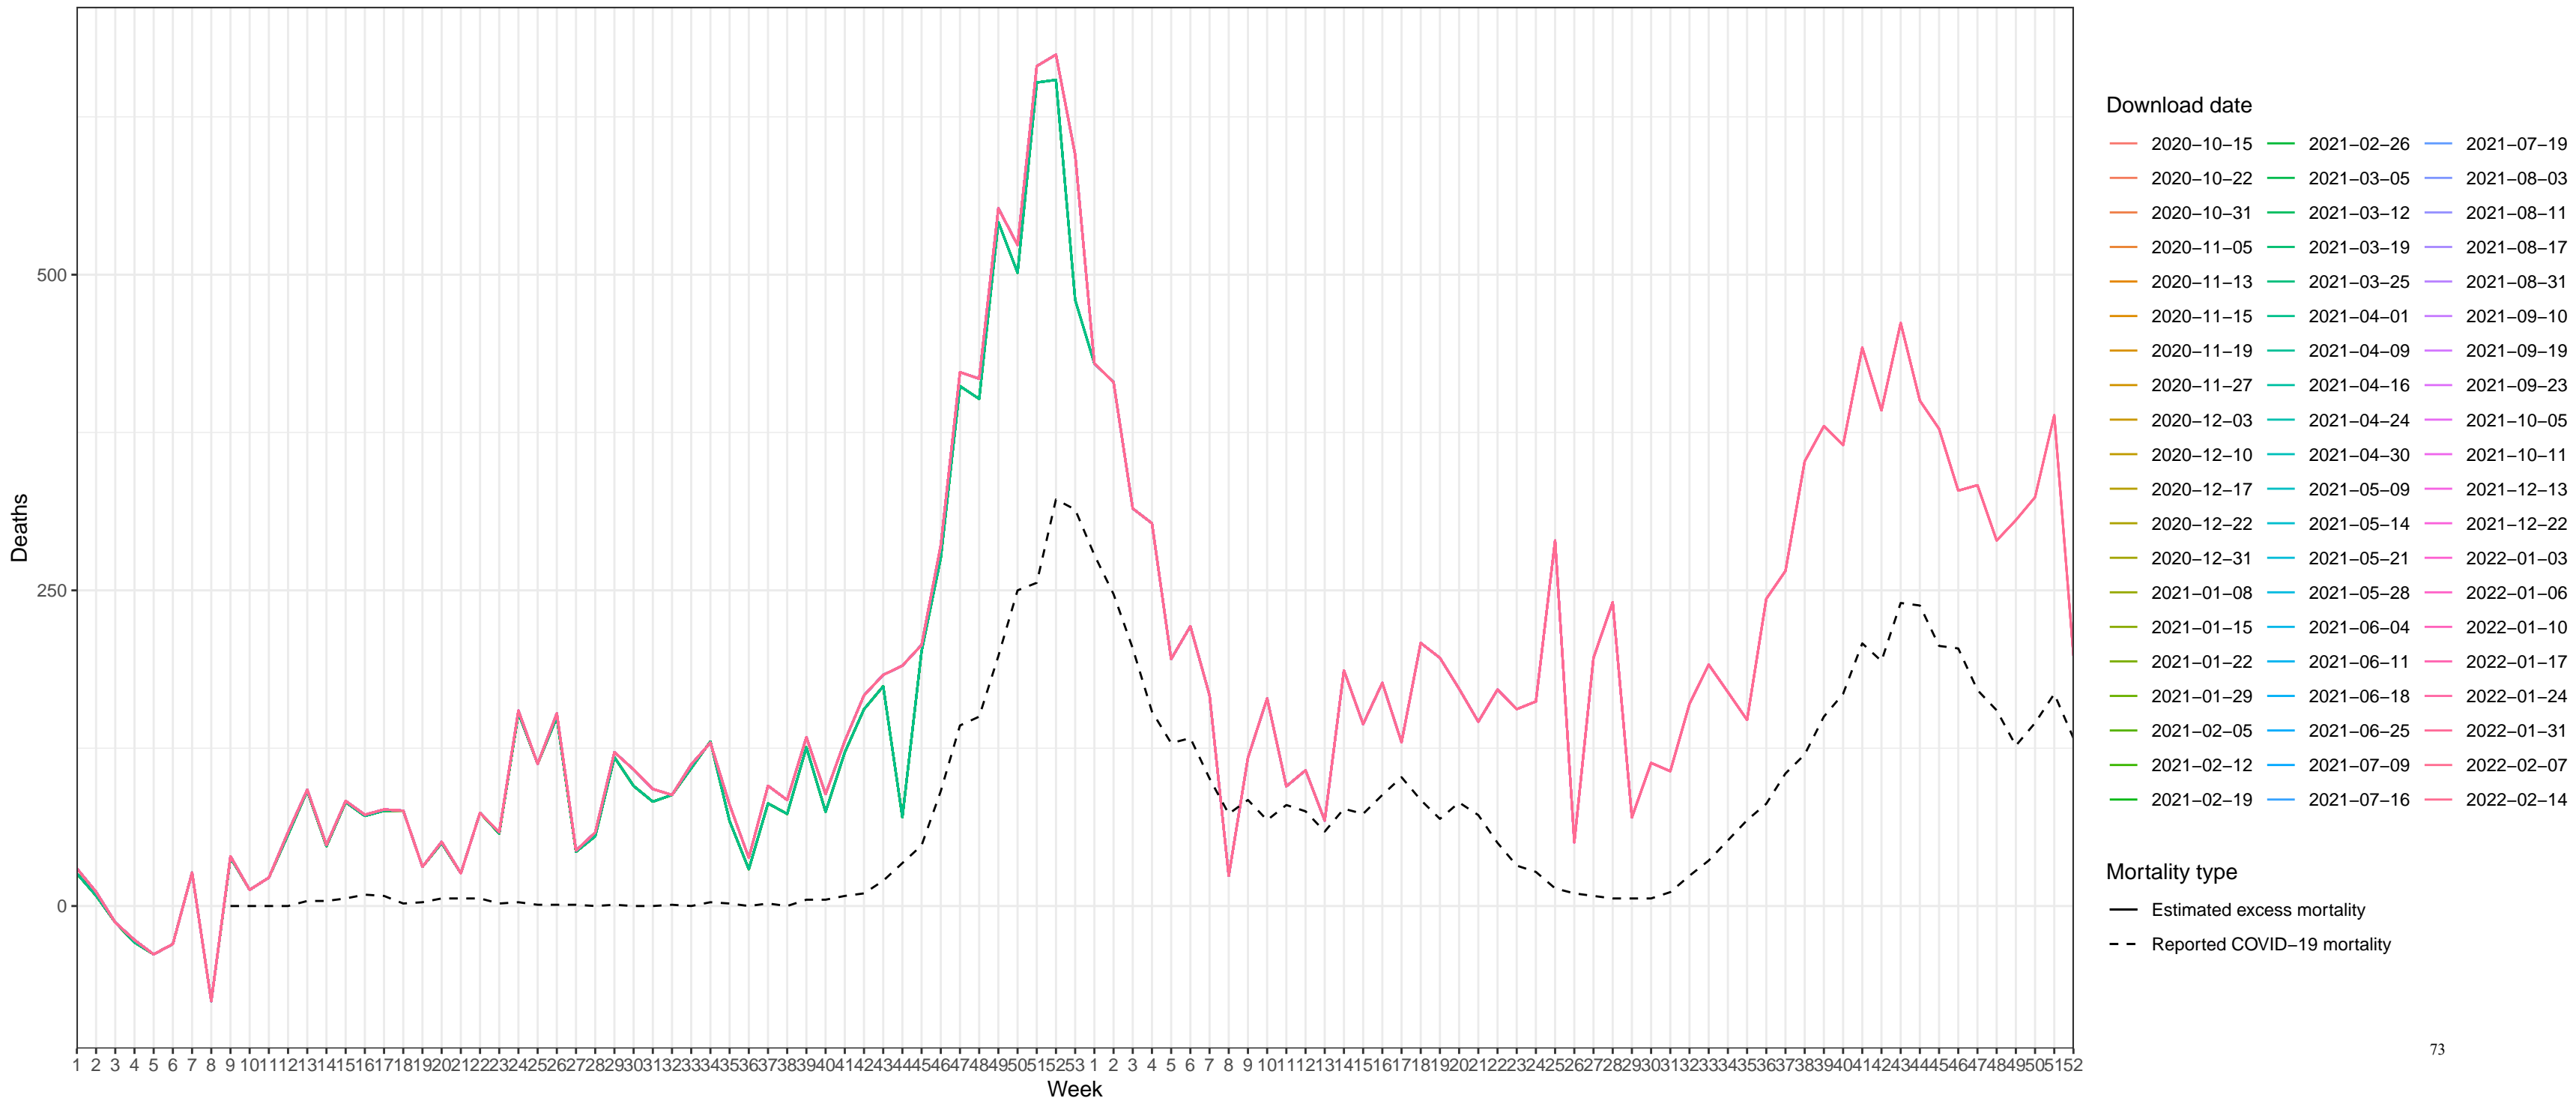

# Luxembourg

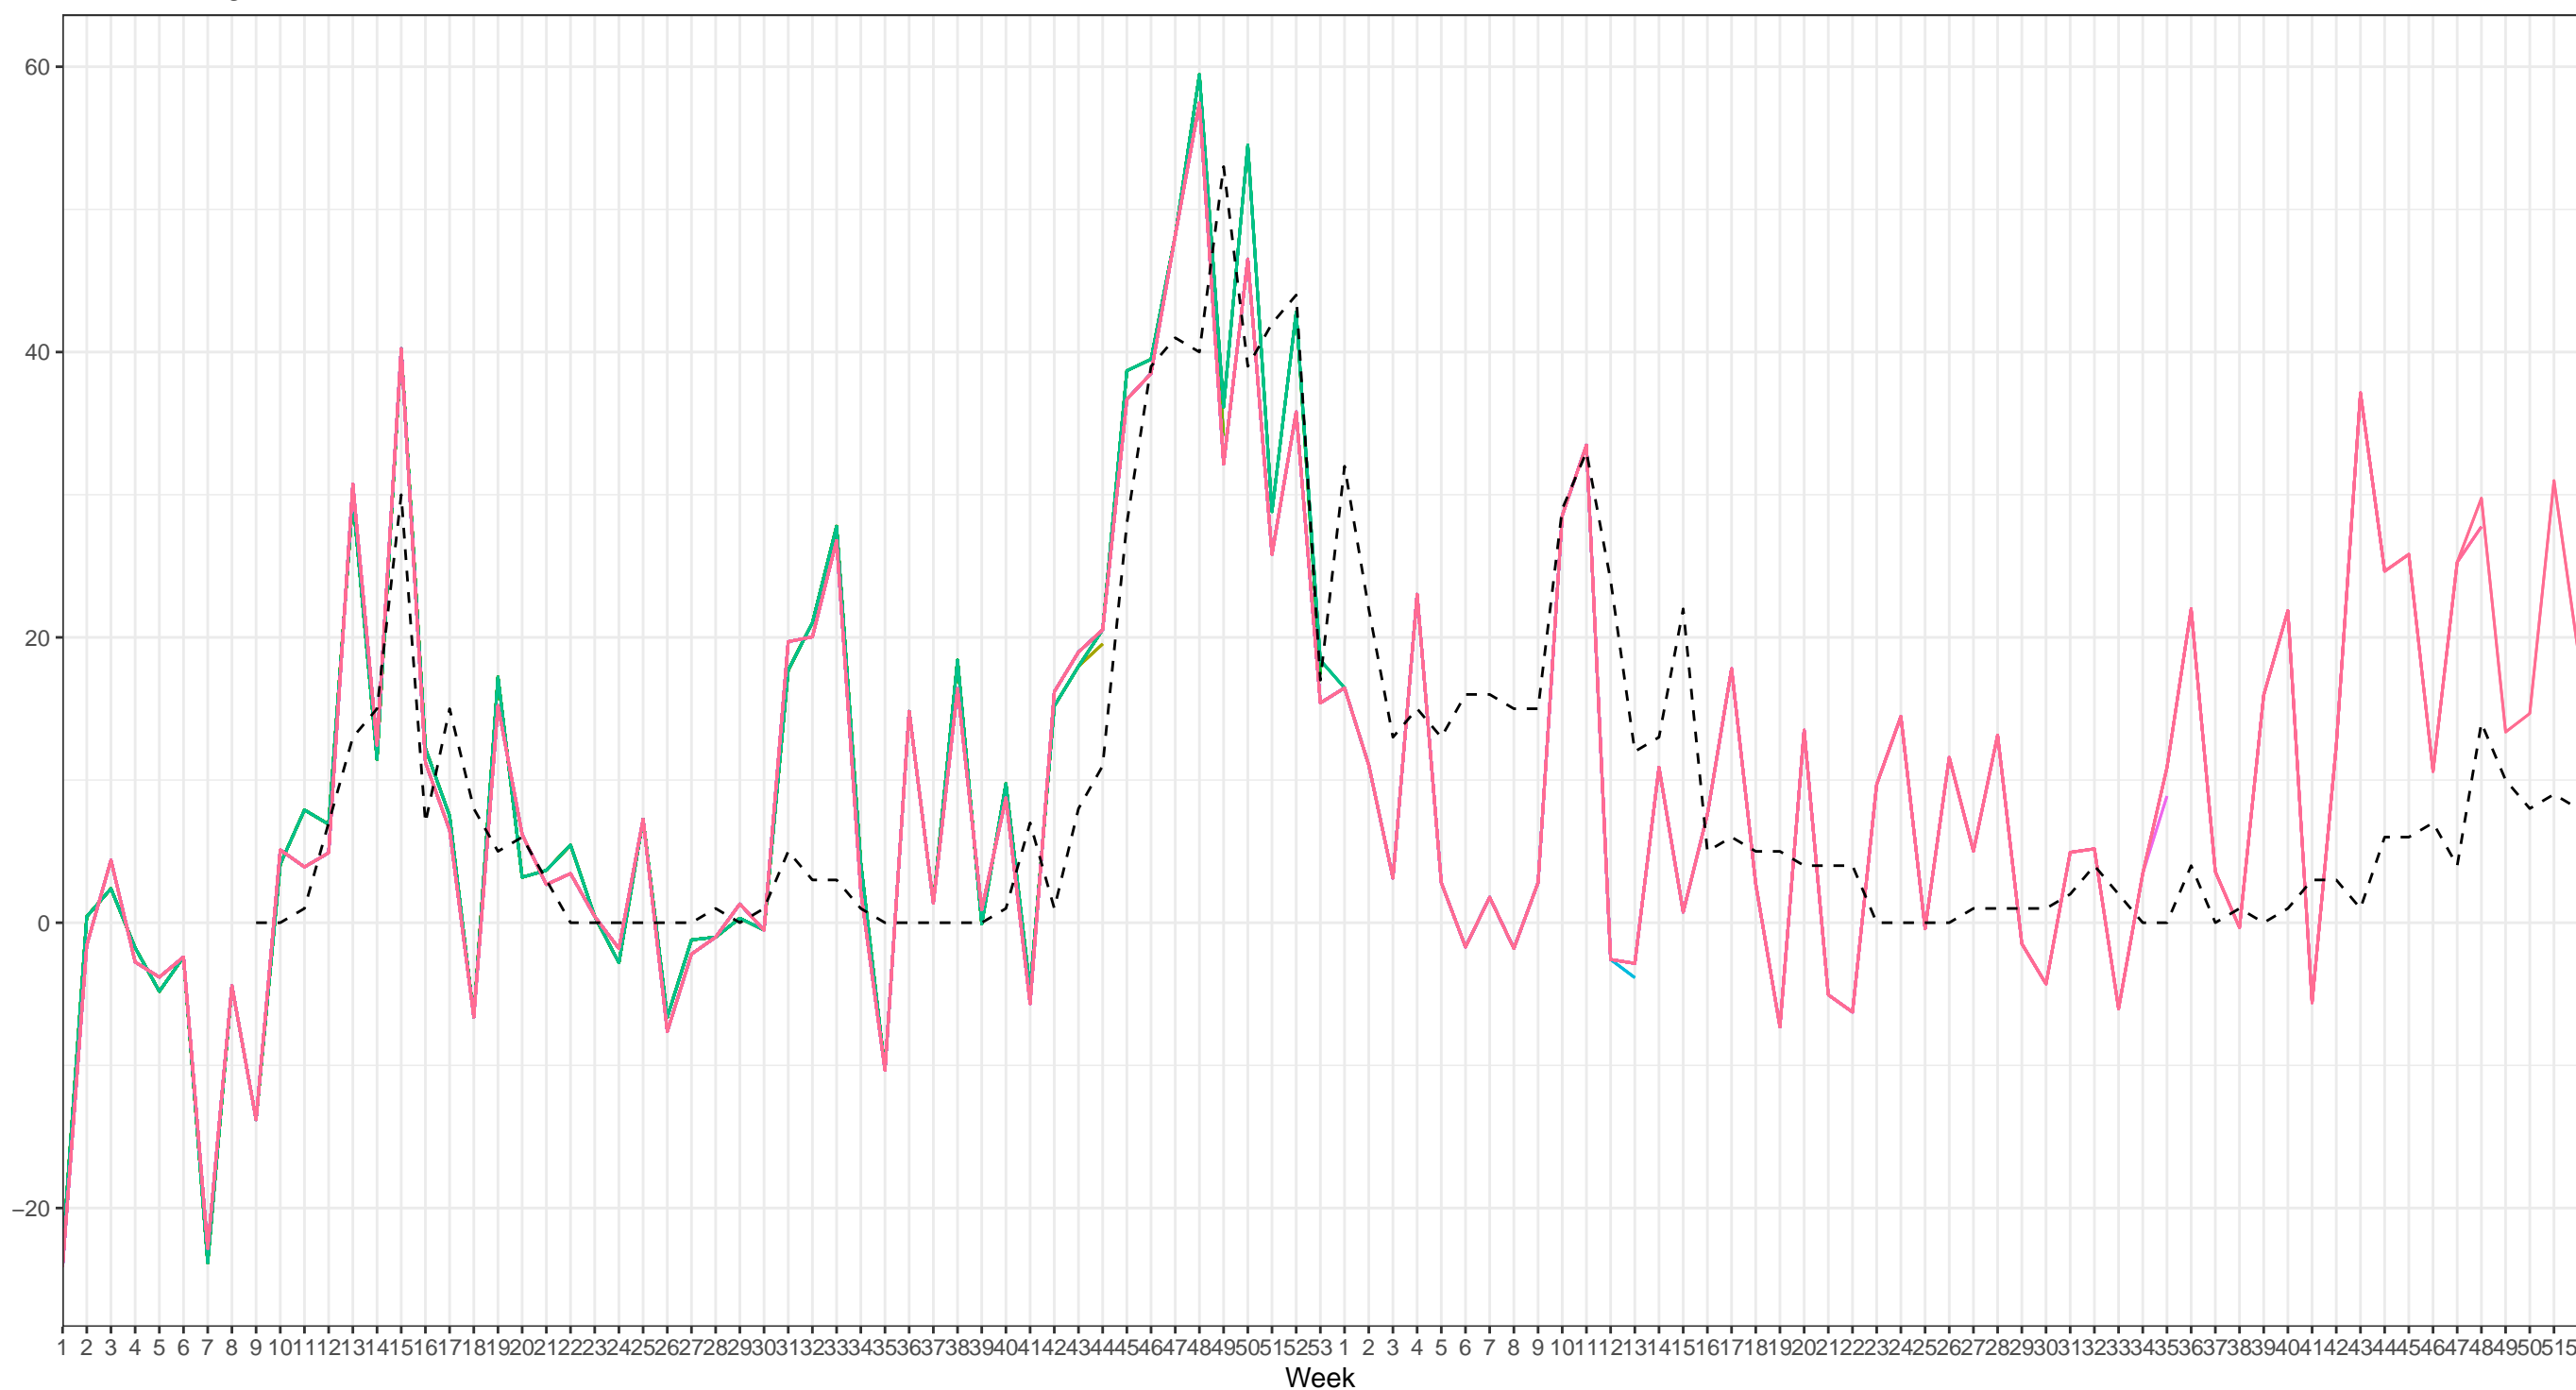

## Download date

- 2020-10-15
- 2020-10-22
- 2020-10-31
- 2020-11-05
- 2020-11-13
- 2020-11-15
- 2020-11-19
- 2020-11-27
- 2020-12-03
- 2020-12-10
- 2020-12-17
- 2020-12-22
- 2020-12-31
- 2021-01-08
- 2021-01-15
- 2021-01-22
- 2021-01-29
- 2021-02-05
- 2021-02-12
- 2021-02-19
- 2021-02-26
- 2021-03-05
- 2021-03-12
- 2021-03-19
- 2021-03-25
- 2021-04-01
- 2021-04-09
- 2021-04-16
- 2021-04-24
- 2021-05-09
- 2021-05-14
- 2021-05-21
- 2021-05-28
- 2021-06-04
- 2021-06-11
- 2021-06-18
- 2021-06-25
- 2021-07-09
- 2021-07-16
- 2021-07-19
- 2021-08-03
- 2021-08-11
- 2021-08-17
- 2021-08-31
- 2021-09-10
- 2021-09-19
- 2021-09-23
- 2021-10-05
- 2021-10-11
- 2021-12-13
- 2021-12-22
- 2022-01-03
- 2022-01-06
- 2022-01-10
- 2022-01-17
- 2022-01-24
- 2022-01-31
- 2022-02-07
- 2022-02-14

## Mortality type

- Estimated excess mortality
- - Reported COVID-19 mortality

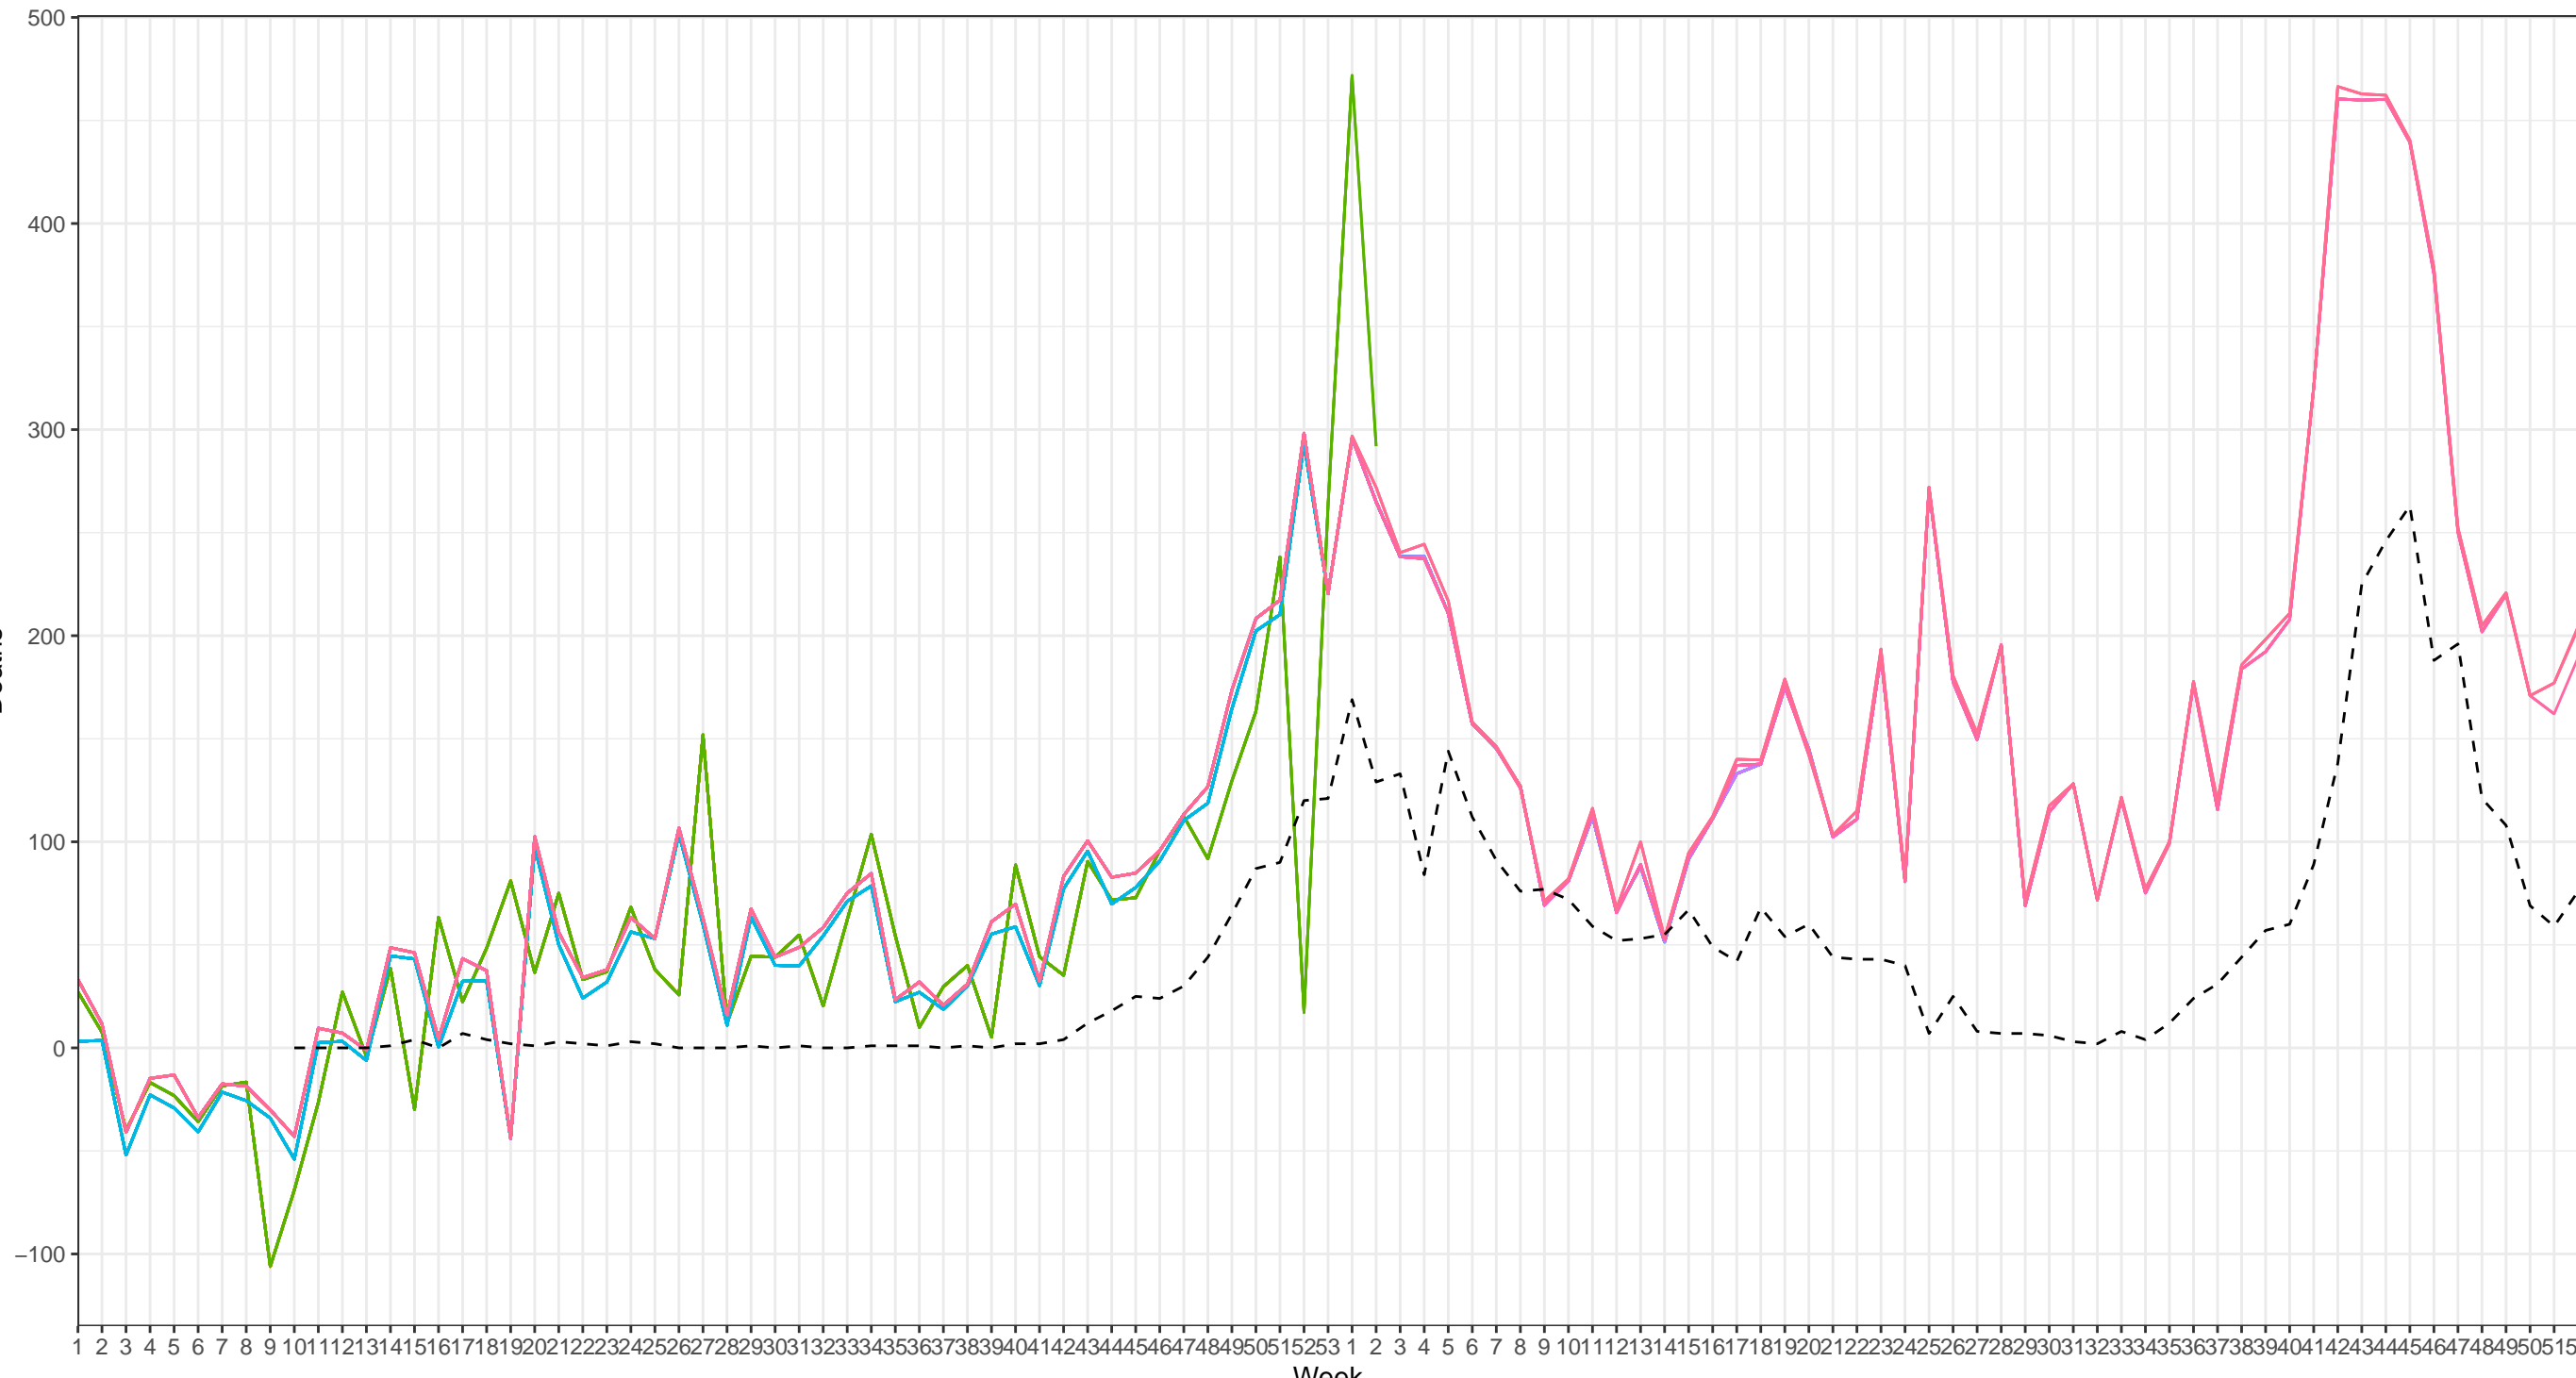

**Download date**

|            |            |            |
|------------|------------|------------|
| 2020-10-15 | 2021-02-26 | 2021-07-19 |
| 2020-10-22 | 2021-03-05 | 2021-08-03 |
| 2020-10-31 | 2021-03-12 | 2021-08-11 |
| 2020-11-05 | 2021-03-19 | 2021-08-17 |
| 2020-11-13 | 2021-03-25 | 2021-08-31 |
| 2020-11-15 | 2021-04-01 | 2021-09-10 |
| 2020-11-19 | 2021-04-09 | 2021-09-19 |
| 2020-11-27 | 2021-04-16 | 2021-09-23 |
| 2020-12-03 | 2021-04-24 | 2021-10-05 |
| 2020-12-10 | 2021-05-09 | 2021-10-11 |
| 2020-12-17 | 2021-05-14 | 2021-12-13 |
| 2020-12-22 | 2021-05-21 | 2021-12-22 |
| 2020-12-31 | 2021-05-28 | 2022-01-03 |
| 2021-01-08 | 2021-06-04 | 2022-01-06 |
| 2021-01-15 | 2021-06-11 | 2022-01-10 |
| 2021-01-22 | 2021-06-18 | 2022-01-17 |
| 2021-01-29 | 2021-06-25 | 2022-01-24 |
| 2021-02-05 | 2021-07-09 | 2022-01-31 |
| 2021-02-12 | 2021-07-16 | 2022-02-07 |
| 2021-02-19 |            | 2022-02-14 |

**Mortality type**

- Estimated excess mortality
- - Reported COVID-19 mortality

# Netherlands

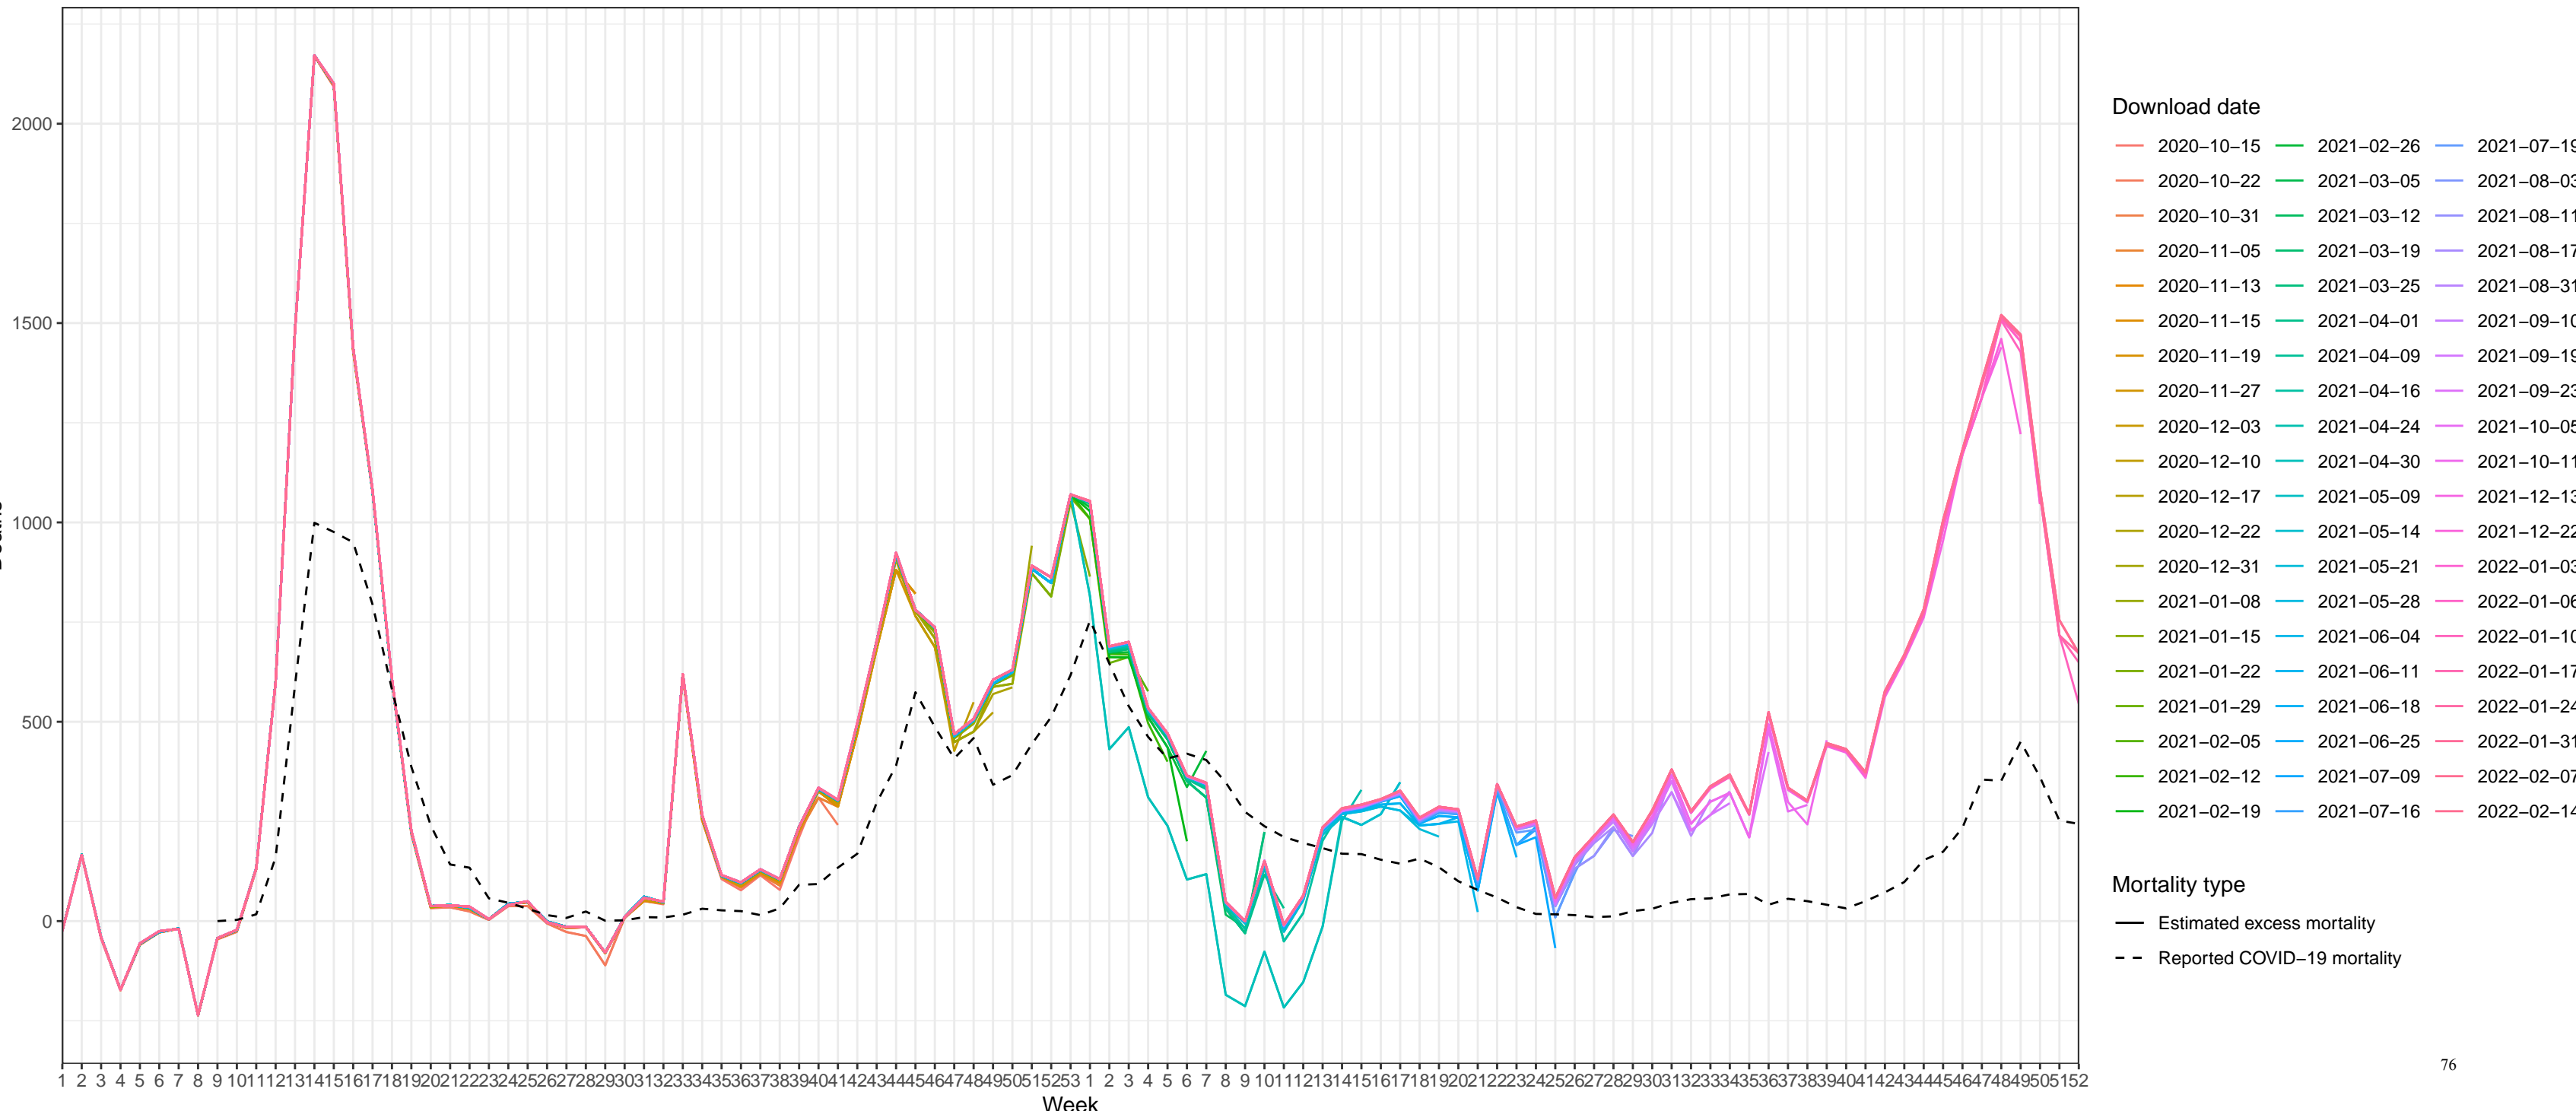

**Download date**

|            |            |            |
|------------|------------|------------|
| 2020-10-15 | 2021-02-26 | 2021-07-19 |
| 2020-10-22 | 2021-03-05 | 2021-08-03 |
| 2020-10-31 | 2021-03-12 | 2021-08-11 |
| 2020-11-05 | 2021-03-19 | 2021-08-17 |
| 2020-11-13 | 2021-03-25 | 2021-08-31 |
| 2020-11-15 | 2021-04-01 | 2021-09-10 |
| 2020-11-19 | 2021-04-09 | 2021-09-19 |
| 2020-11-27 | 2021-04-16 | 2021-09-23 |
| 2020-12-03 | 2021-04-24 | 2021-10-05 |
| 2020-12-10 | 2021-05-09 | 2021-10-11 |
| 2020-12-17 | 2021-05-14 | 2021-12-13 |
| 2020-12-22 | 2021-05-21 | 2021-12-22 |
| 2020-12-31 | 2021-05-28 | 2022-01-03 |
| 2021-01-08 | 2021-06-04 | 2022-01-06 |
| 2021-01-15 | 2021-06-11 | 2022-01-10 |
| 2021-01-22 | 2021-06-18 | 2022-01-17 |
| 2021-01-29 | 2021-06-25 | 2022-01-24 |
| 2021-02-05 | 2021-07-02 | 2022-01-31 |
| 2021-02-12 | 2021-07-09 | 2022-02-07 |
| 2021-02-19 | 2021-07-16 | 2022-02-14 |

**Mortality type**

- Estimated excess mortality
- - Reported COVID-19 mortality

# Norway

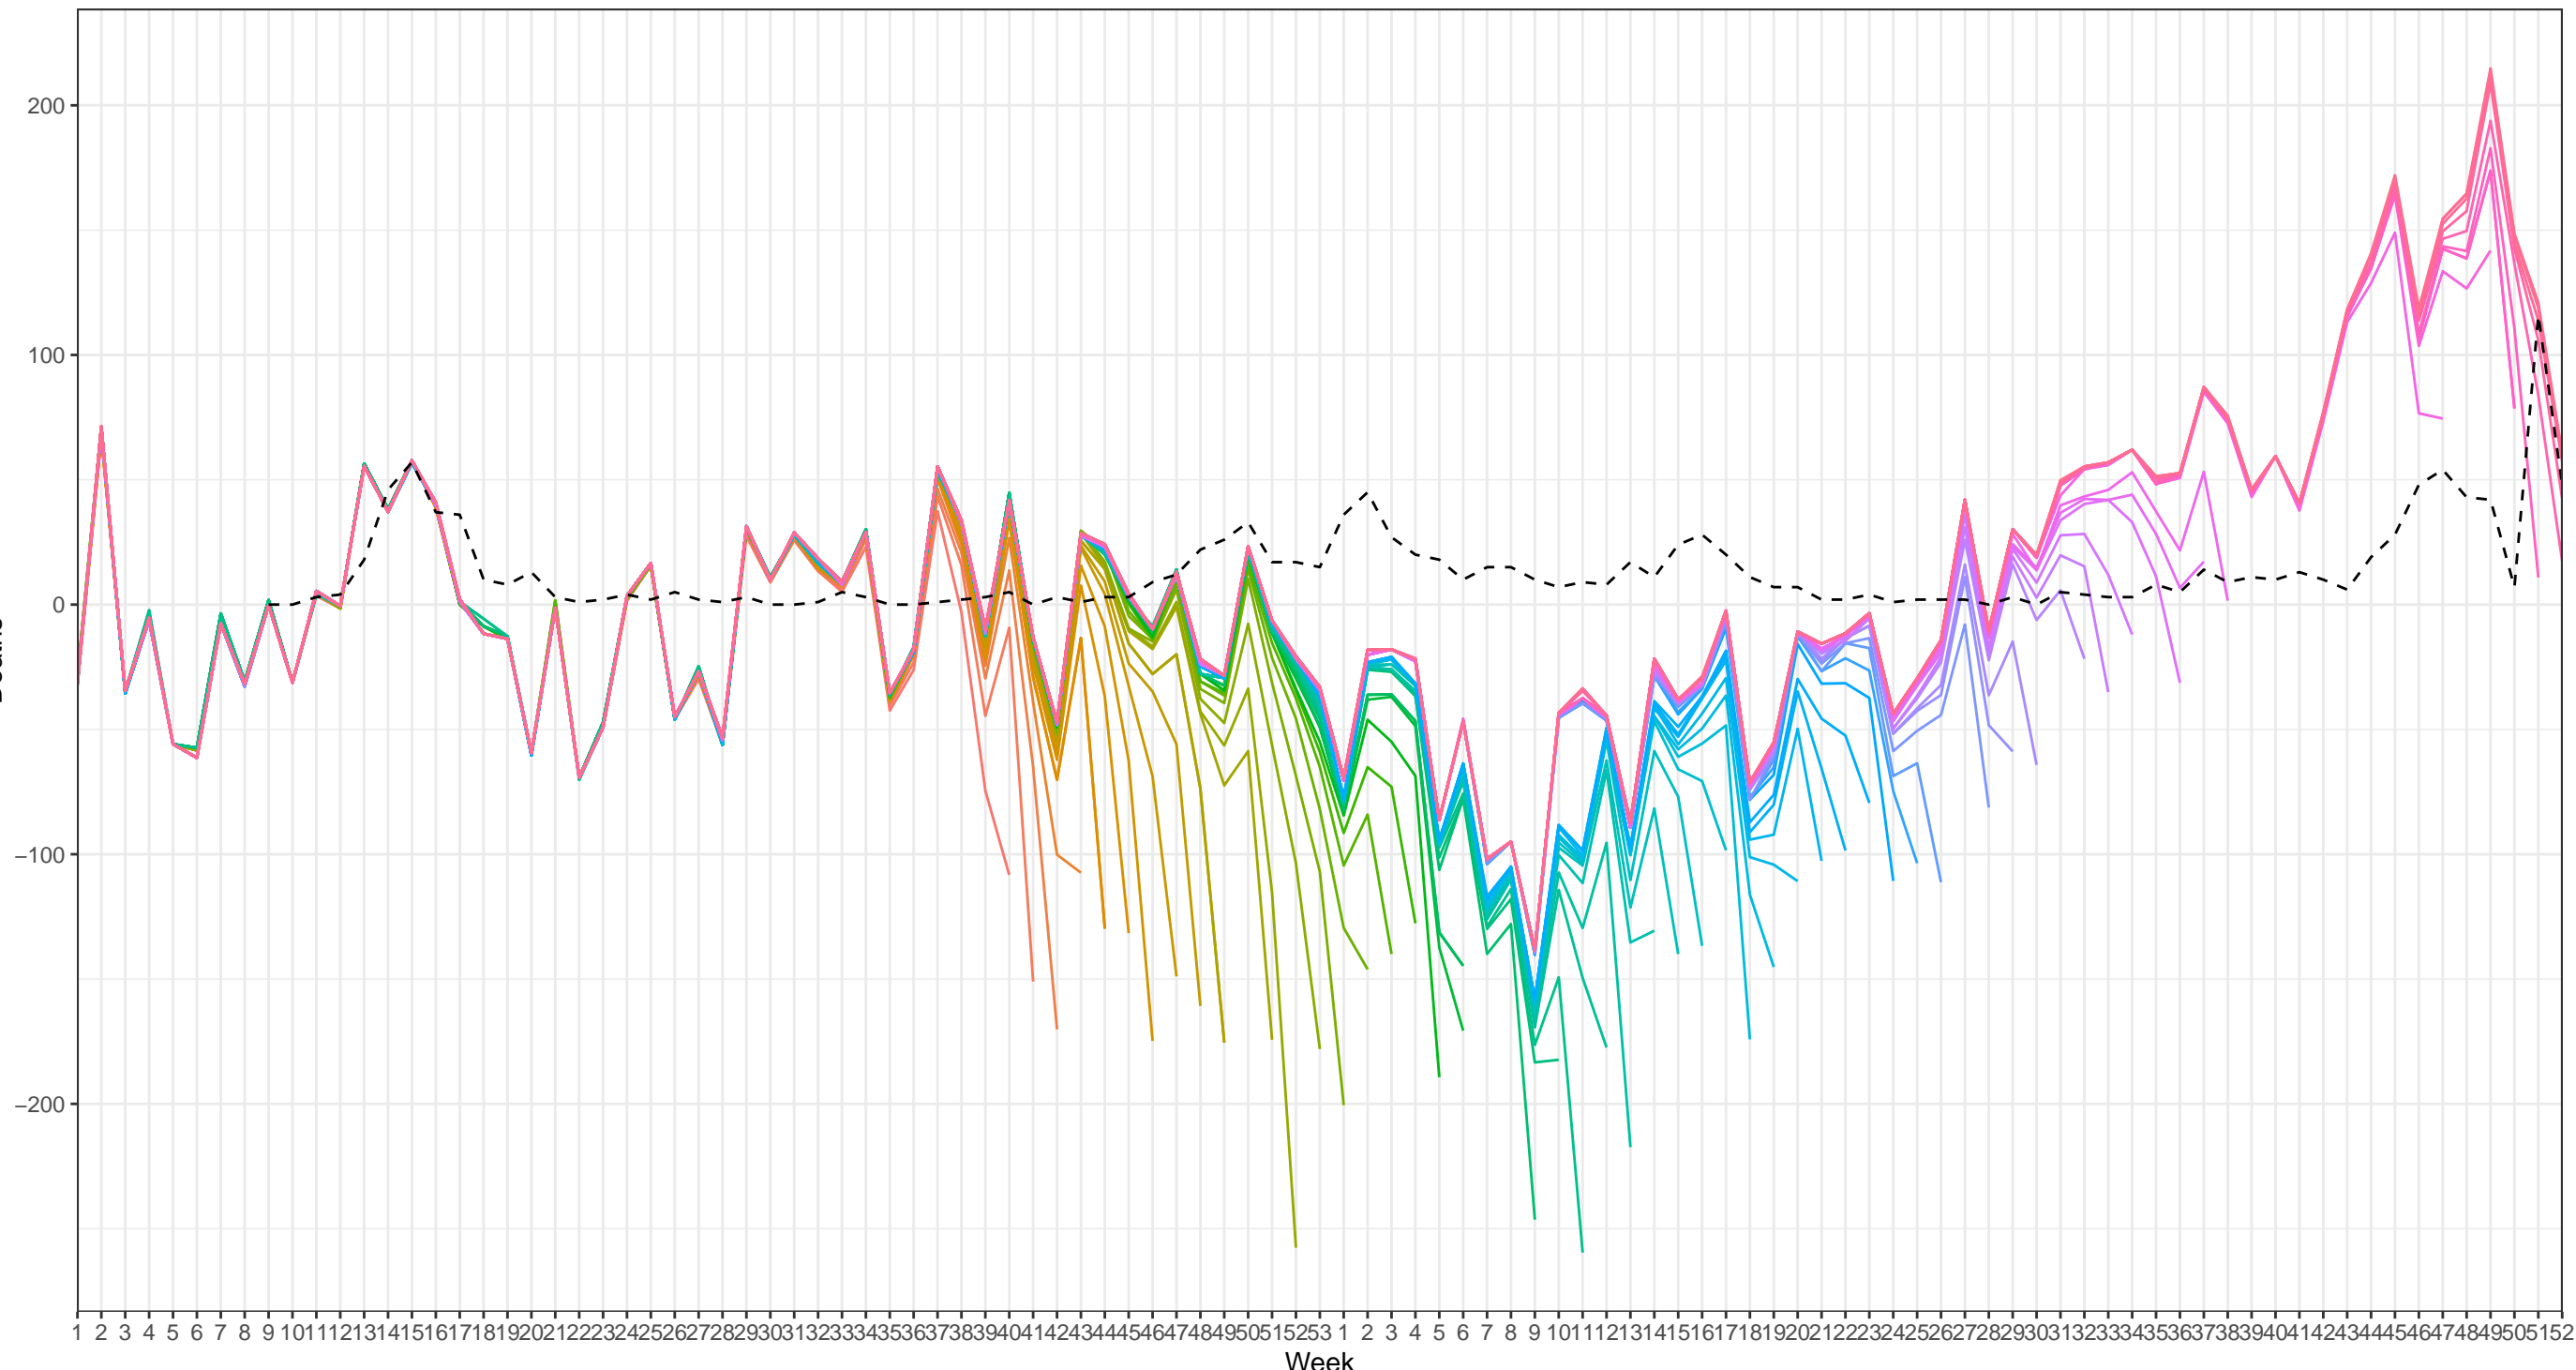

**Download date**

|            |            |            |
|------------|------------|------------|
| 2020-10-15 | 2021-02-26 | 2021-07-19 |
| 2020-10-22 | 2021-03-05 | 2021-08-03 |
| 2020-10-31 | 2021-03-12 | 2021-08-11 |
| 2020-11-05 | 2021-03-19 | 2021-08-17 |
| 2020-11-13 | 2021-03-25 | 2021-08-31 |
| 2020-11-15 | 2021-04-01 | 2021-09-10 |
| 2020-11-19 | 2021-04-09 | 2021-09-19 |
| 2020-11-27 | 2021-04-16 | 2021-09-23 |
| 2020-12-03 | 2021-04-24 | 2021-10-05 |
| 2020-12-10 | 2021-05-09 | 2021-10-11 |
| 2020-12-17 | 2021-05-14 | 2021-12-13 |
| 2020-12-22 | 2021-05-21 | 2021-12-22 |
| 2020-12-31 | 2021-05-28 | 2022-01-03 |
| 2021-01-08 | 2021-06-04 | 2022-01-06 |
| 2021-01-15 | 2021-06-11 | 2022-01-10 |
| 2021-01-22 | 2021-06-18 | 2022-01-17 |
| 2021-01-29 | 2021-06-25 | 2022-01-24 |
| 2021-02-05 | 2021-07-09 | 2022-01-31 |
| 2021-02-12 | 2021-07-16 | 2022-02-07 |
| 2021-02-19 |            | 2022-02-14 |

**Mortality type**

- Estimated excess mortality
- - Reported COVID-19 mortality

# New Zealand

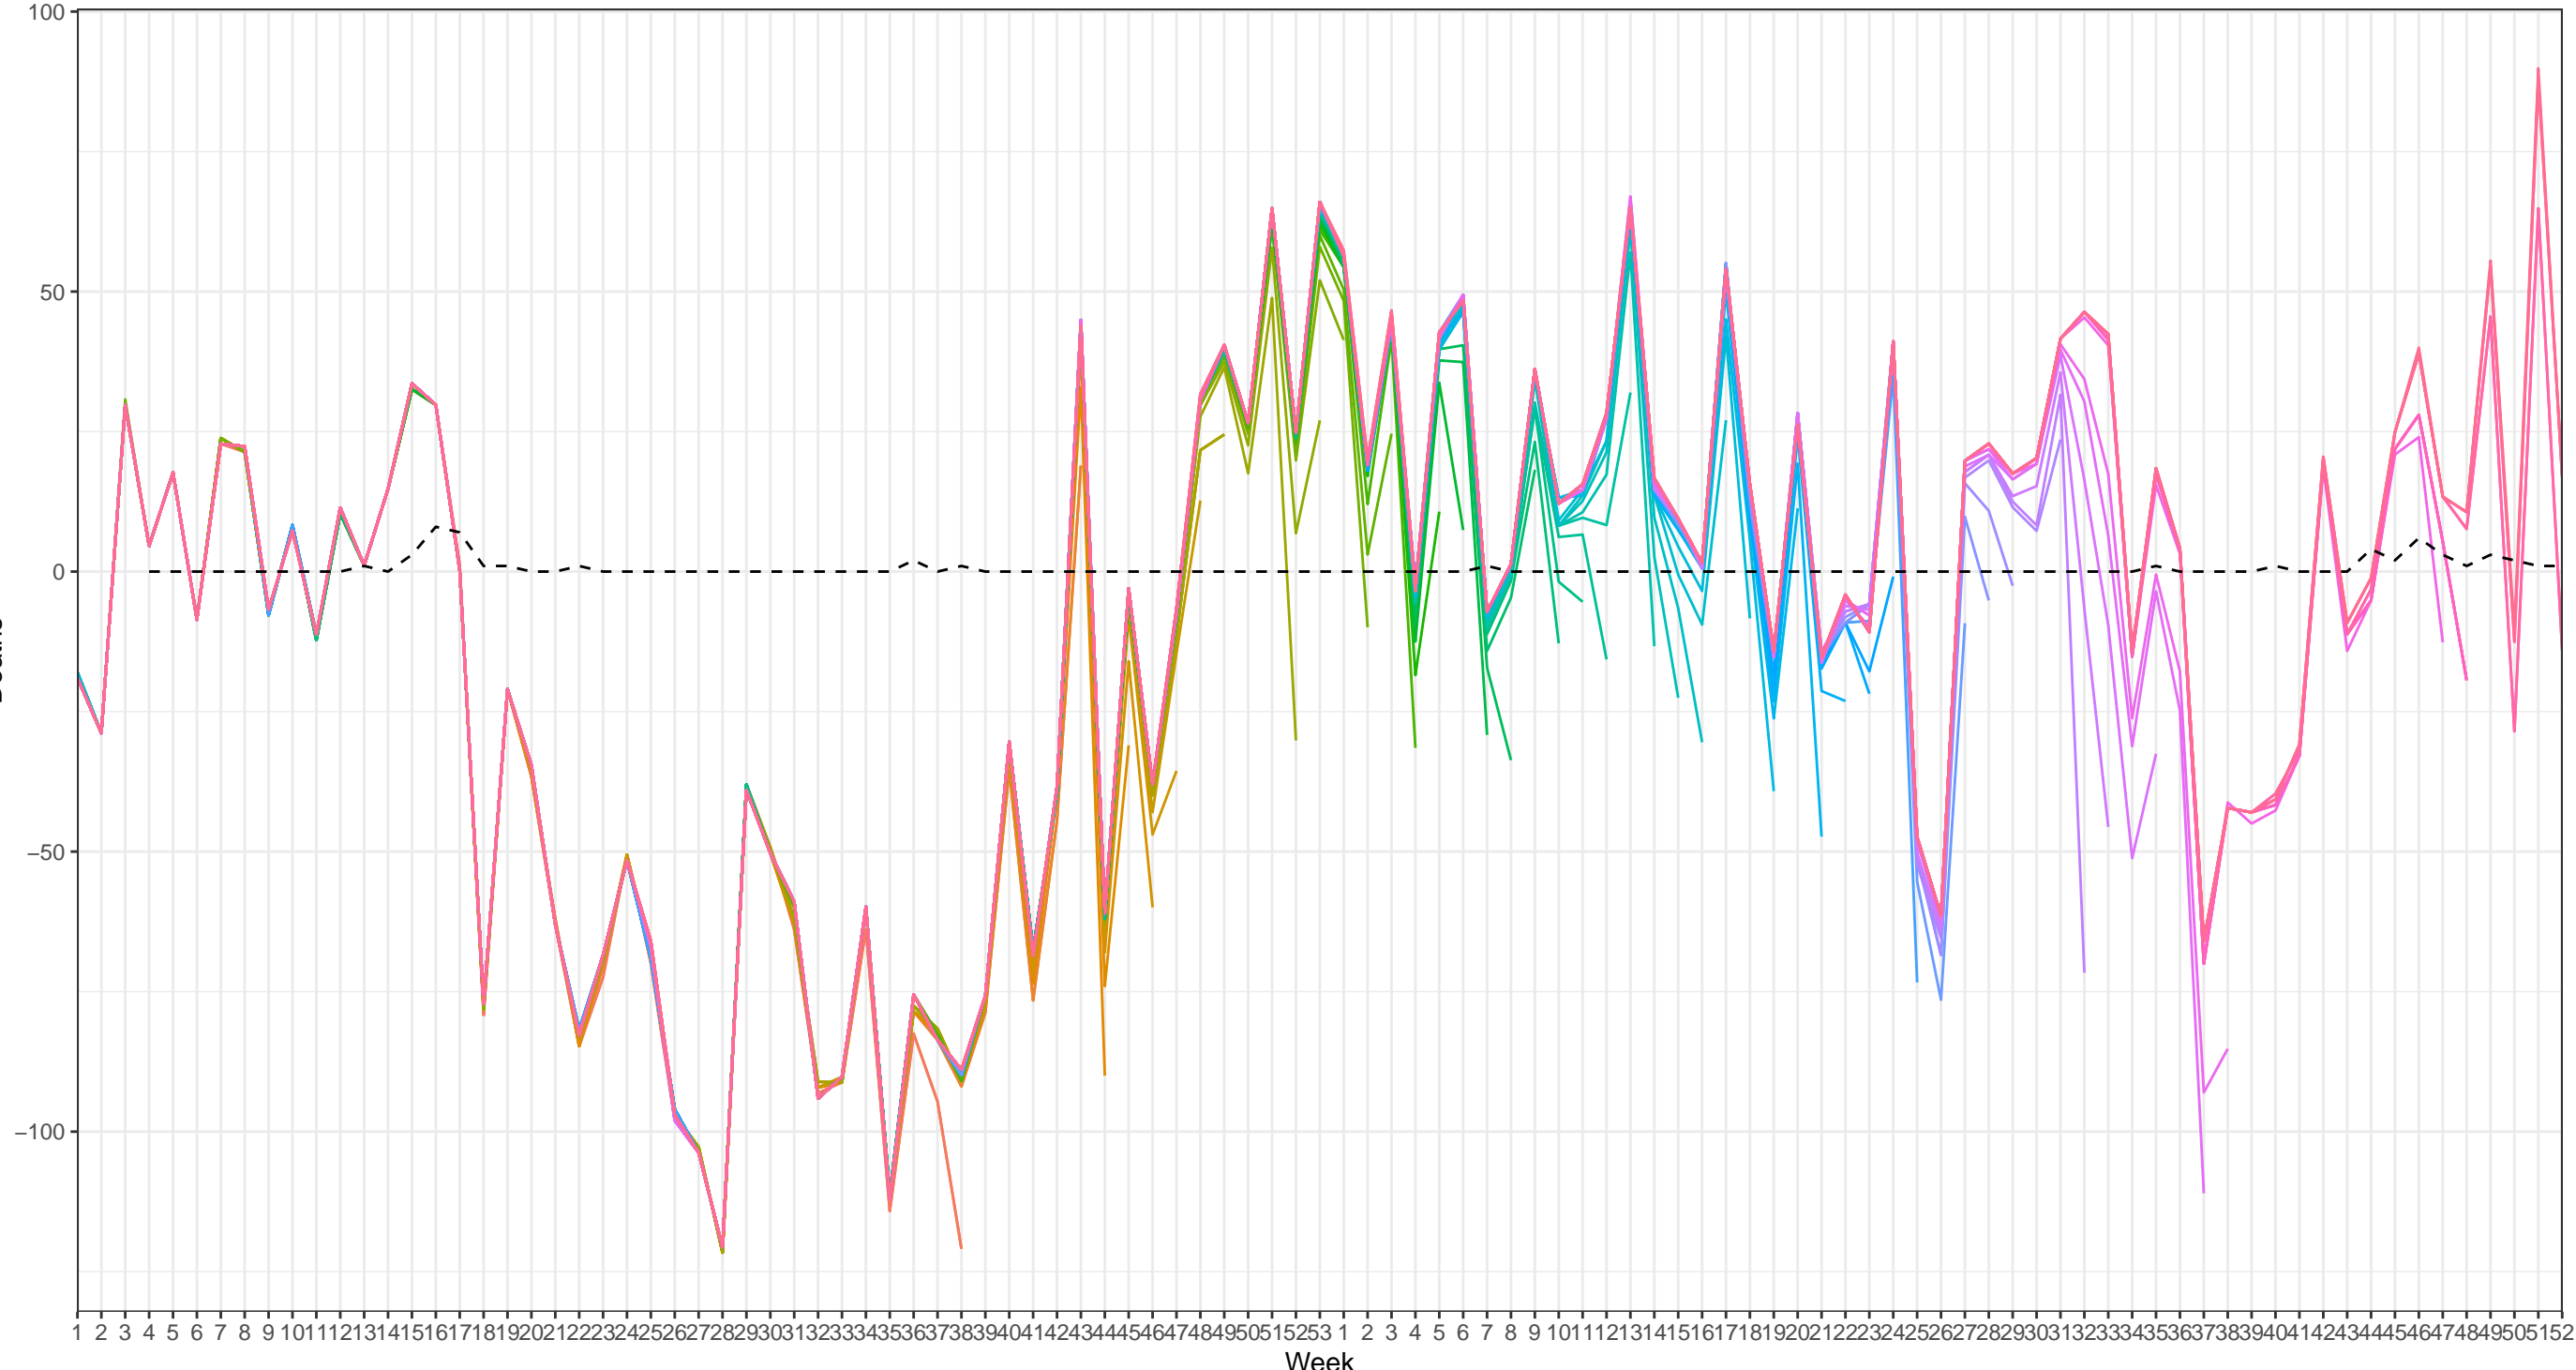

**Download date**

|            |            |            |
|------------|------------|------------|
| 2020-10-15 | 2021-03-12 | 2021-08-11 |
| 2020-10-22 | 2021-03-19 | 2021-08-17 |
| 2020-11-13 | 2021-03-25 | 2021-08-31 |
| 2020-11-15 | 2021-04-01 | 2021-09-10 |
| 2020-11-19 | 2021-04-09 | 2021-09-19 |
| 2020-11-27 | 2021-04-16 | 2021-09-23 |
| 2020-12-03 | 2021-04-24 | 2021-10-05 |
| 2020-12-10 | 2021-04-30 | 2021-10-11 |
| 2020-12-17 | 2021-05-09 | 2021-12-13 |
| 2020-12-31 | 2021-05-14 | 2021-12-22 |
| 2021-01-08 | 2021-05-21 | 2022-01-03 |
| 2021-01-15 | 2021-05-28 | 2022-01-06 |
| 2021-01-22 | 2021-06-04 | 2022-01-10 |
| 2021-01-29 | 2021-06-11 | 2022-01-17 |
| 2021-02-05 | 2021-06-18 | 2022-01-24 |
| 2021-02-12 | 2021-06-25 | 2022-01-31 |
| 2021-02-19 | 2021-07-09 | 2022-02-07 |
| 2021-02-26 | 2021-07-16 | 2022-02-14 |
| 2021-03-05 | 2021-07-19 |            |
|            | 2021-08-03 |            |

**Mortality type**

- Estimated excess mortality
- - Reported COVID-19 mortality

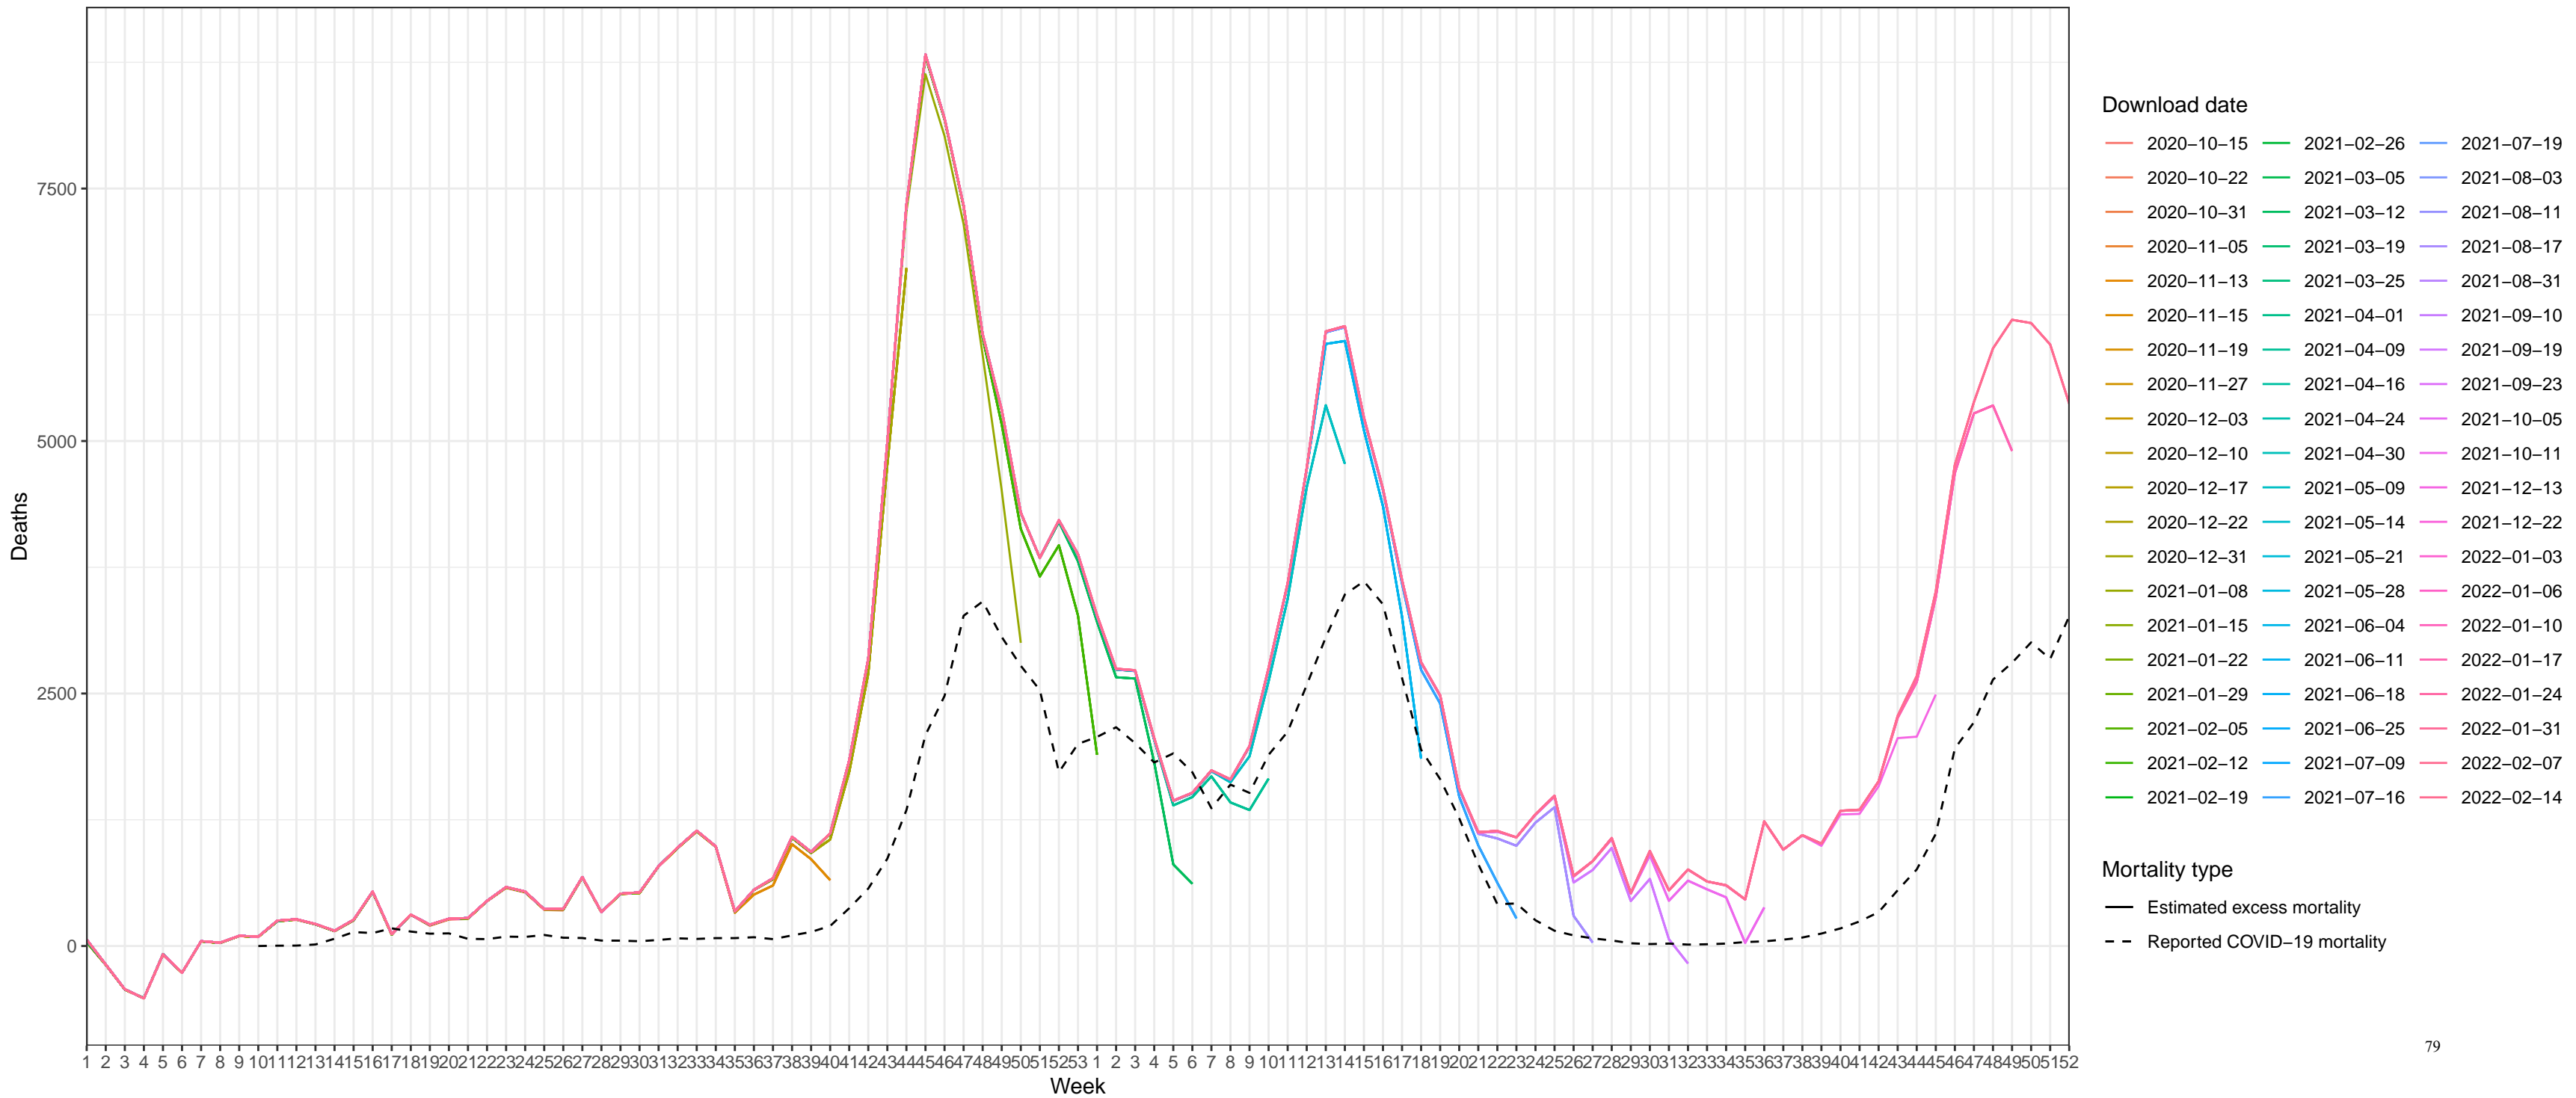



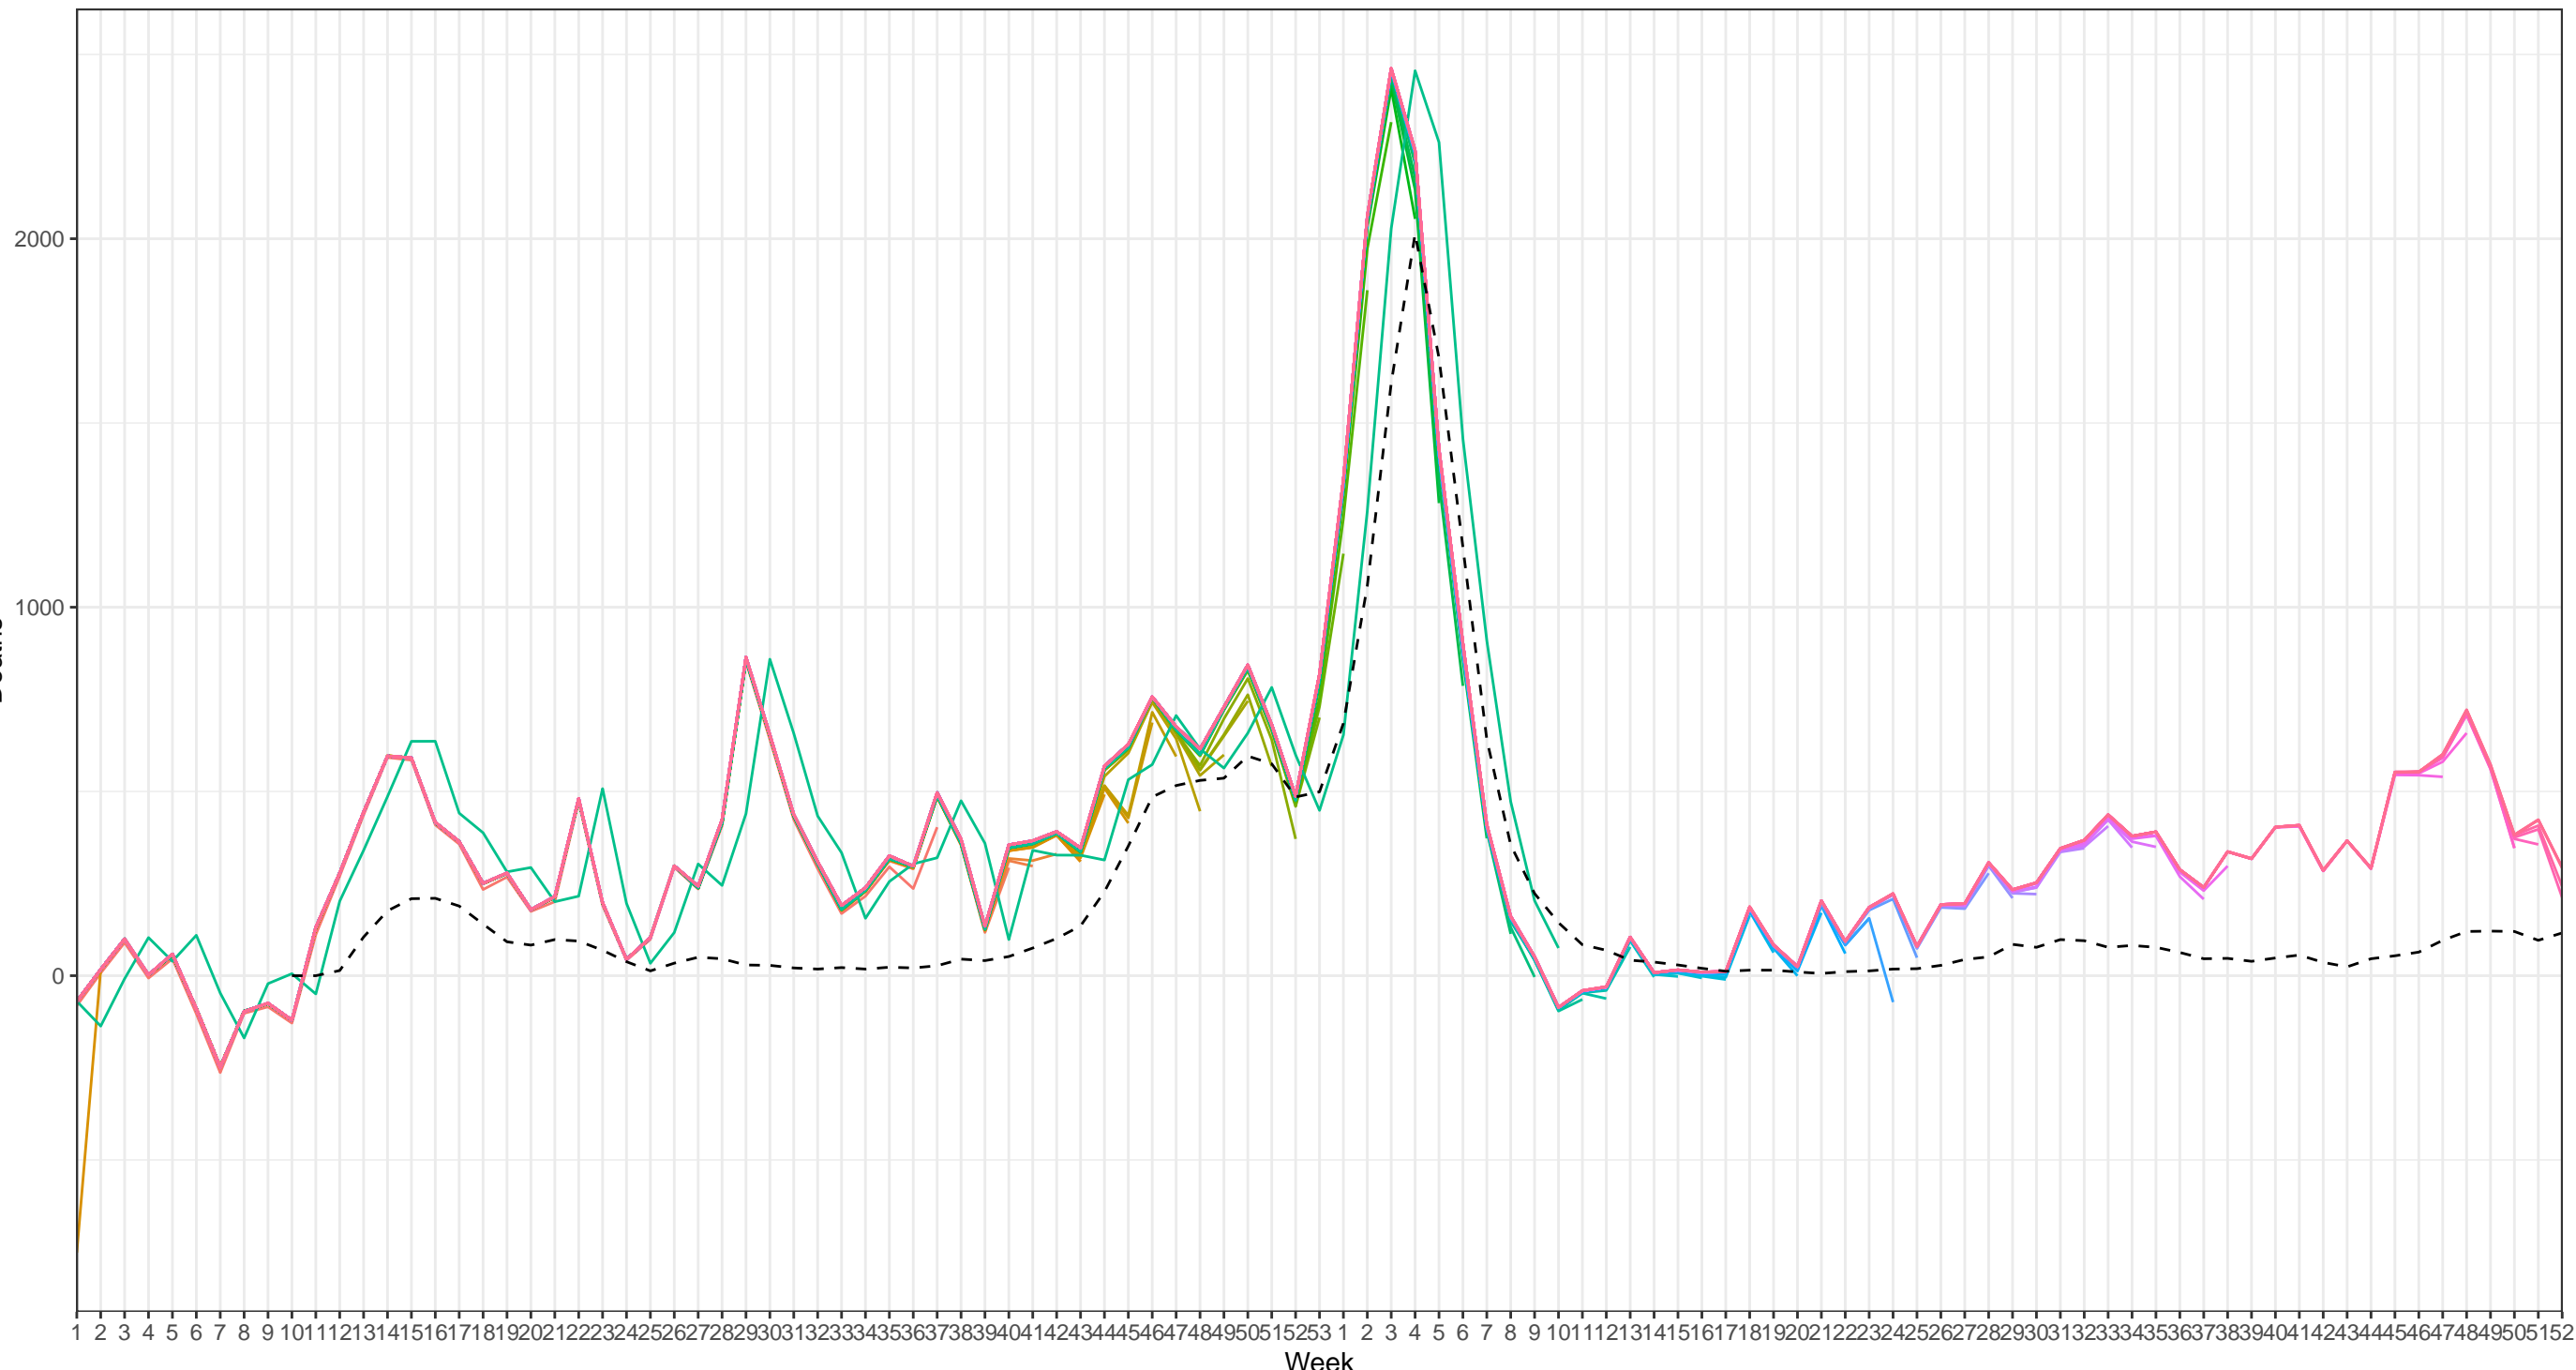

**Download date**

|            |            |            |
|------------|------------|------------|
| 2020-10-15 | 2021-02-26 | 2021-07-19 |
| 2020-10-22 | 2021-03-05 | 2021-08-03 |
| 2020-10-31 | 2021-03-12 | 2021-08-11 |
| 2020-11-05 | 2021-03-19 | 2021-08-17 |
| 2020-11-13 | 2021-03-25 | 2021-08-31 |
| 2020-11-15 | 2021-04-01 | 2021-09-10 |
| 2020-11-19 | 2021-04-09 | 2021-09-19 |
| 2020-11-27 | 2021-04-16 | 2021-09-23 |
| 2020-12-03 | 2021-04-24 | 2021-10-05 |
| 2020-12-10 | 2021-05-09 | 2021-10-11 |
| 2020-12-17 | 2021-05-14 | 2021-12-13 |
| 2020-12-22 | 2021-05-21 | 2021-12-22 |
| 2020-12-31 | 2021-05-28 | 2022-01-03 |
| 2021-01-08 | 2021-06-04 | 2022-01-06 |
| 2021-01-15 | 2021-06-11 | 2022-01-10 |
| 2021-01-22 | 2021-06-18 | 2022-01-17 |
| 2021-01-29 | 2021-06-25 | 2022-01-24 |
| 2021-02-05 | 2021-07-09 | 2022-01-31 |
| 2021-02-12 | 2021-07-16 | 2022-02-07 |
| 2021-02-19 |            | 2022-02-14 |

**Mortality type**

- Estimated excess mortality
- - Reported COVID-19 mortality

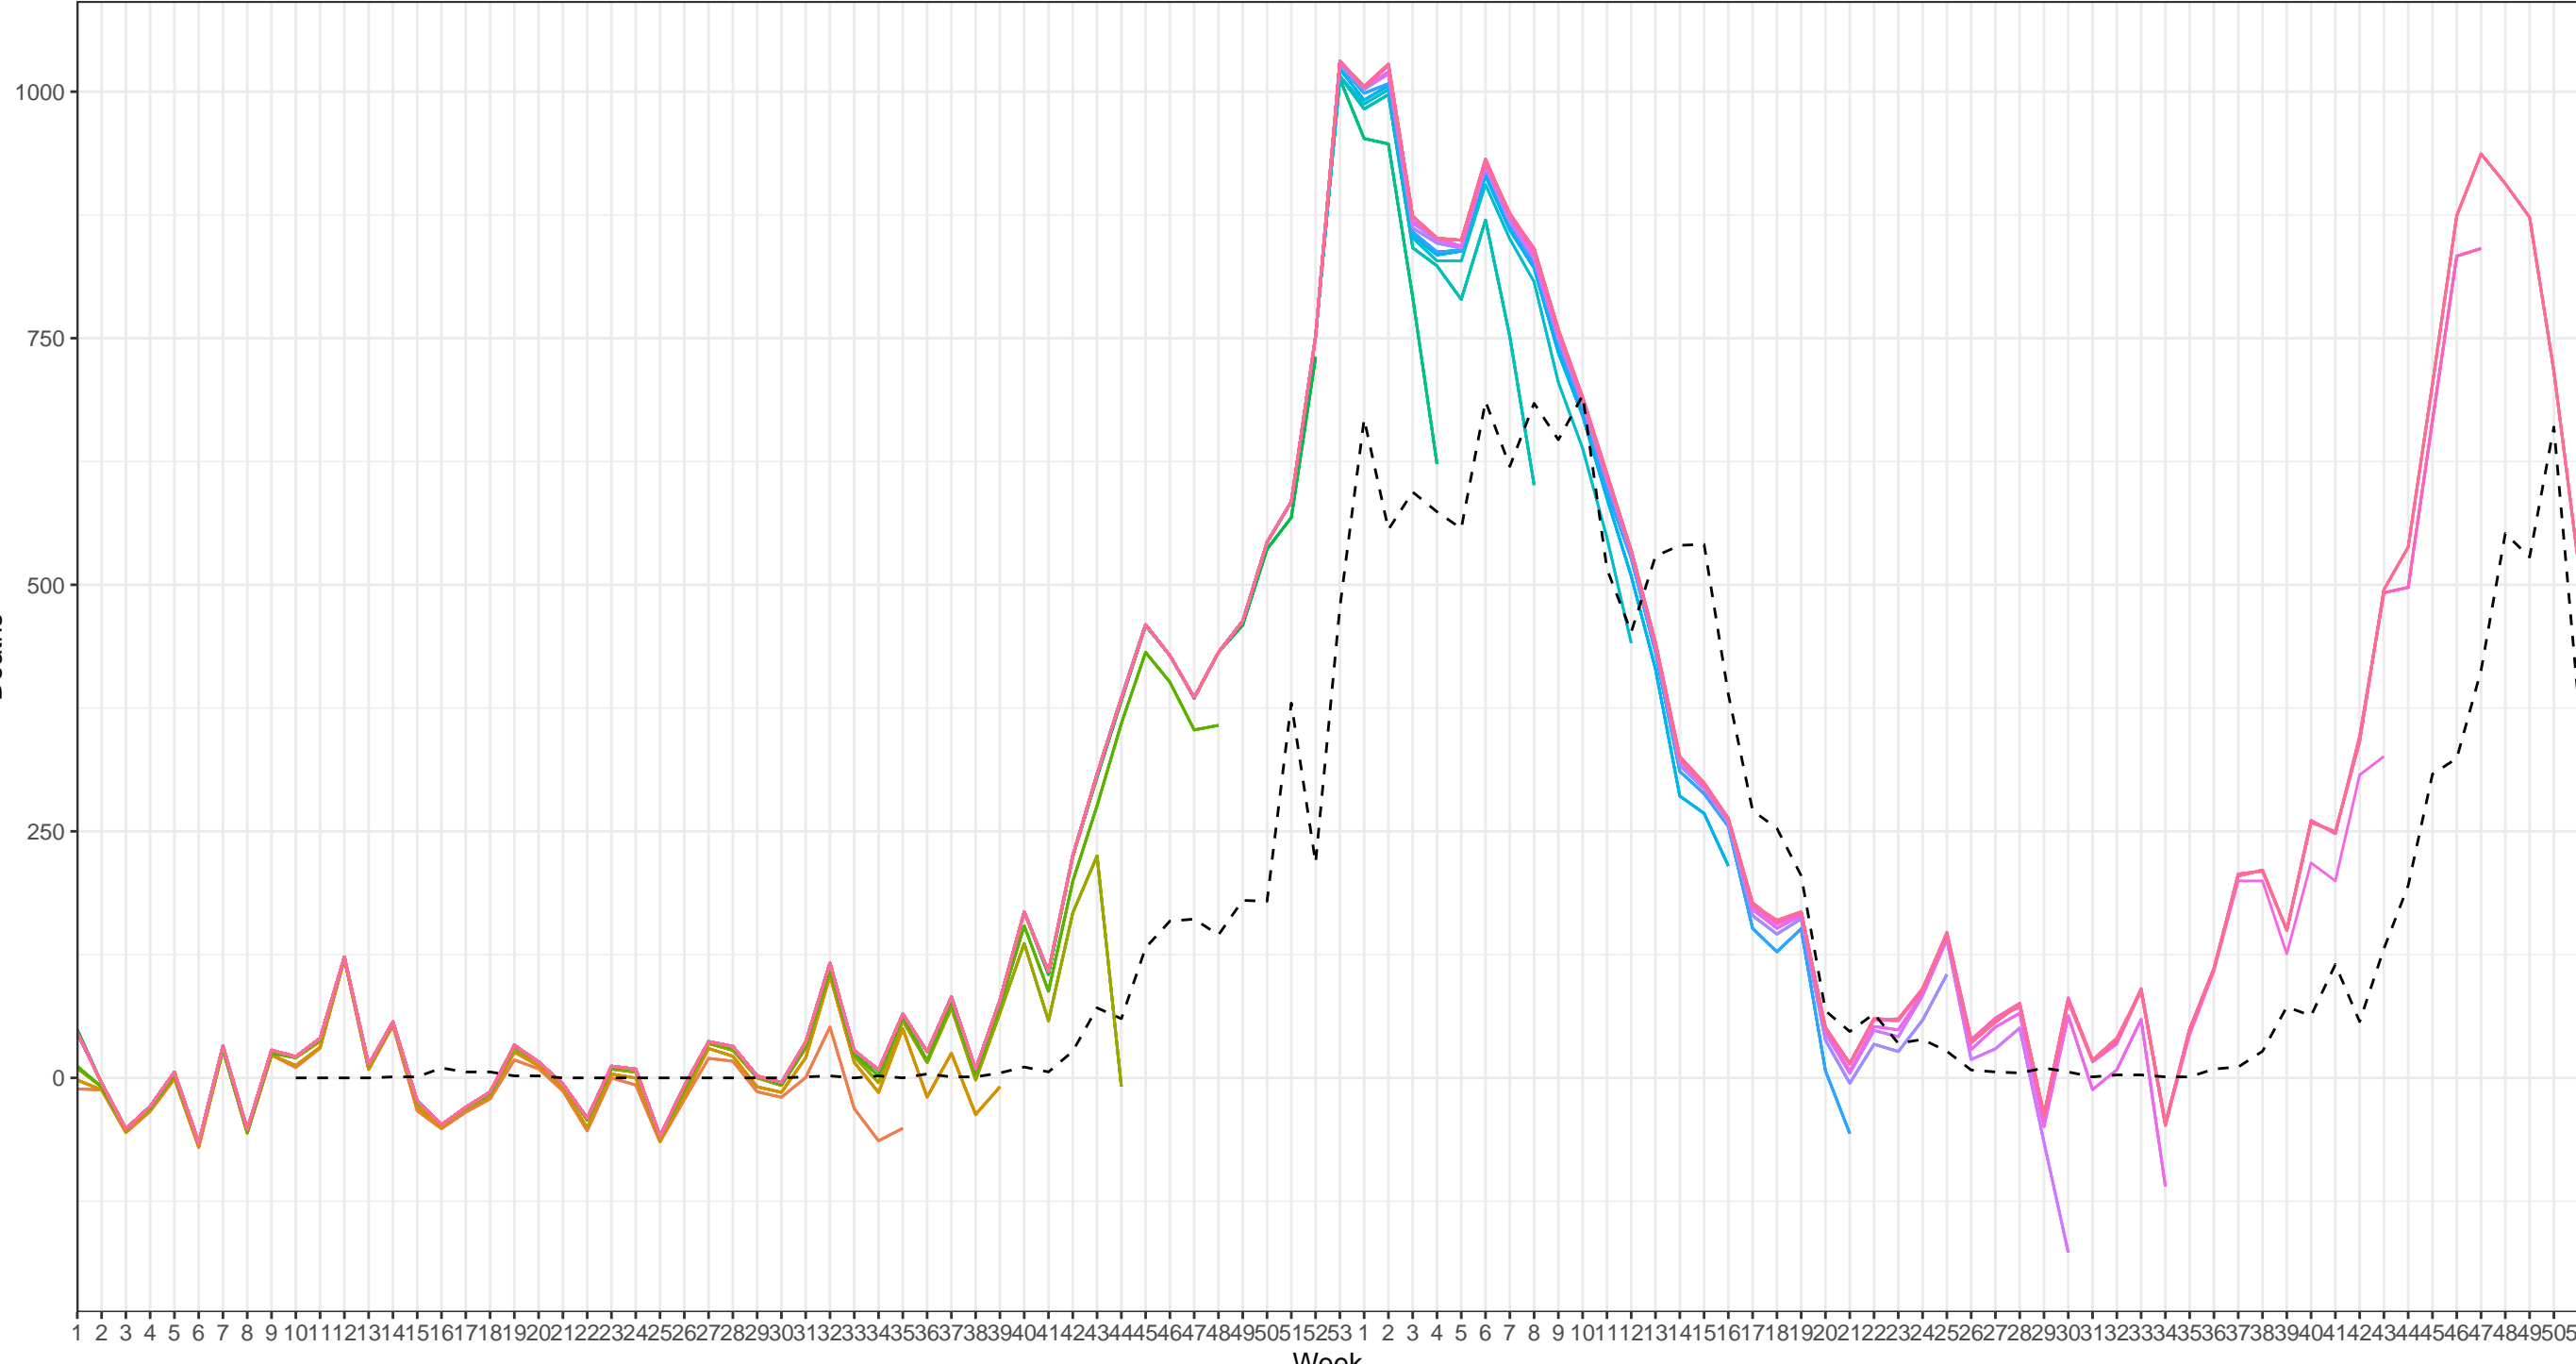

**Download date**

|            |            |            |
|------------|------------|------------|
| 2020-10-15 | 2021-02-26 | 2021-07-19 |
| 2020-10-22 | 2021-03-05 | 2021-08-03 |
| 2020-10-31 | 2021-03-12 | 2021-08-11 |
| 2020-11-05 | 2021-03-19 | 2021-08-17 |
| 2020-11-13 | 2021-03-25 | 2021-08-31 |
| 2020-11-15 | 2021-04-01 | 2021-09-10 |
| 2020-11-19 | 2021-04-09 | 2021-09-19 |
| 2020-11-27 | 2021-04-16 | 2021-09-23 |
| 2020-12-03 | 2021-04-24 | 2021-10-05 |
| 2020-12-10 | 2021-05-09 | 2021-10-11 |
| 2020-12-17 | 2021-05-14 | 2021-12-13 |
| 2020-12-22 | 2021-05-21 | 2021-12-22 |
| 2020-12-31 | 2021-05-28 | 2022-01-03 |
| 2021-01-08 | 2021-06-04 | 2022-01-06 |
| 2021-01-15 | 2021-06-11 | 2022-01-10 |
| 2021-01-22 | 2021-06-18 | 2022-01-17 |
| 2021-01-29 | 2021-06-25 | 2022-01-24 |
| 2021-02-05 | 2021-07-09 | 2022-01-31 |
| 2021-02-12 | 2021-07-16 | 2022-02-07 |
| 2021-02-19 |            | 2022-02-14 |

**Mortality type**

- Estimated excess mortality
- - Reported COVID-19 mortality

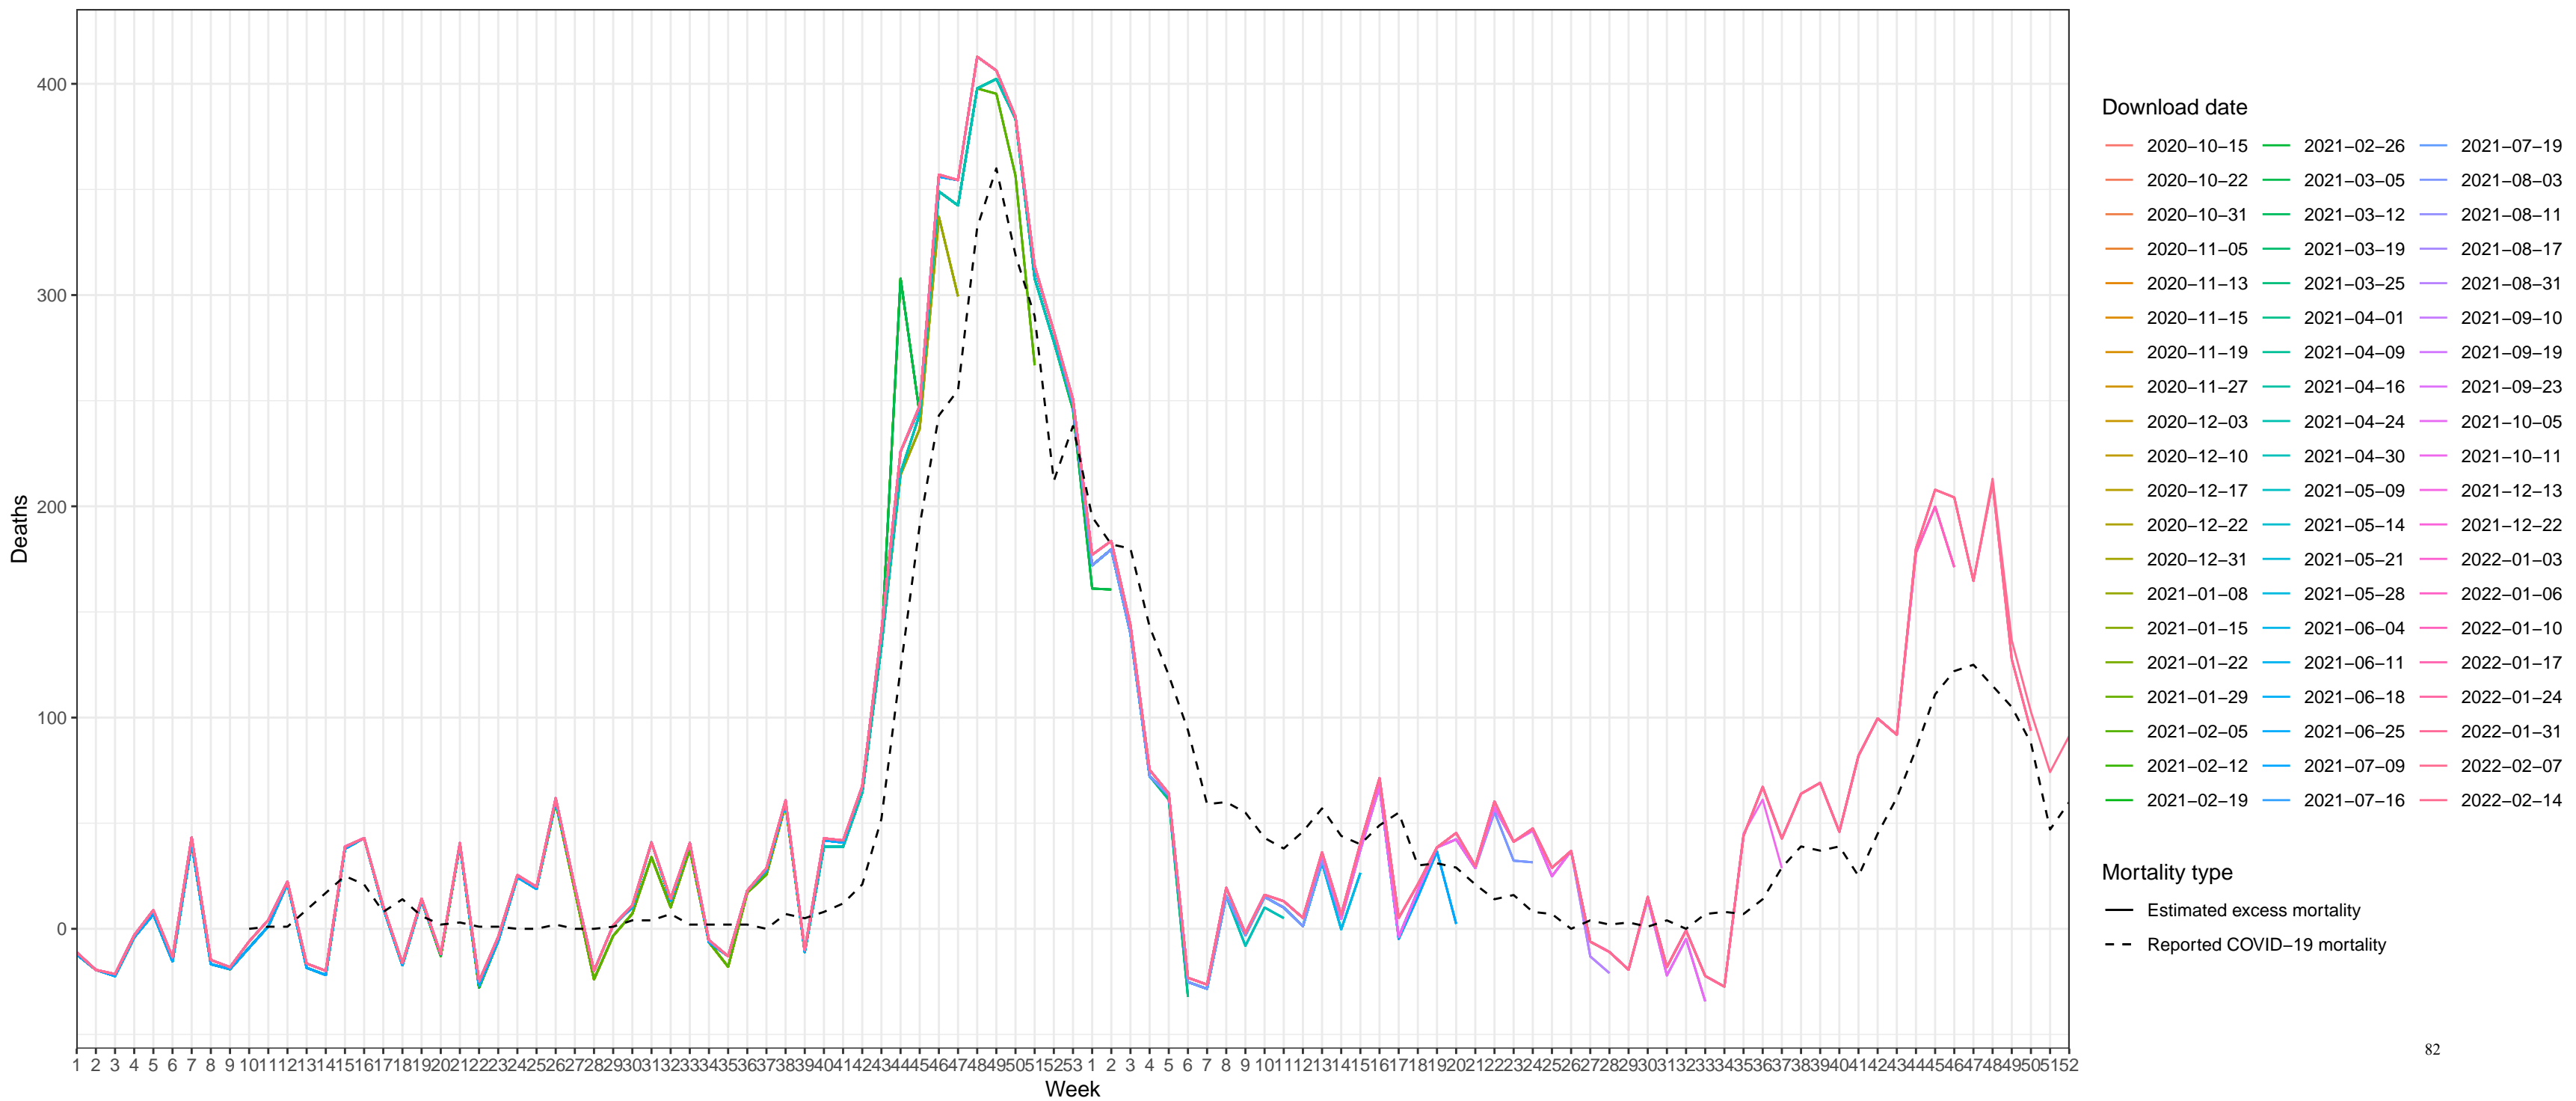

# Sweden

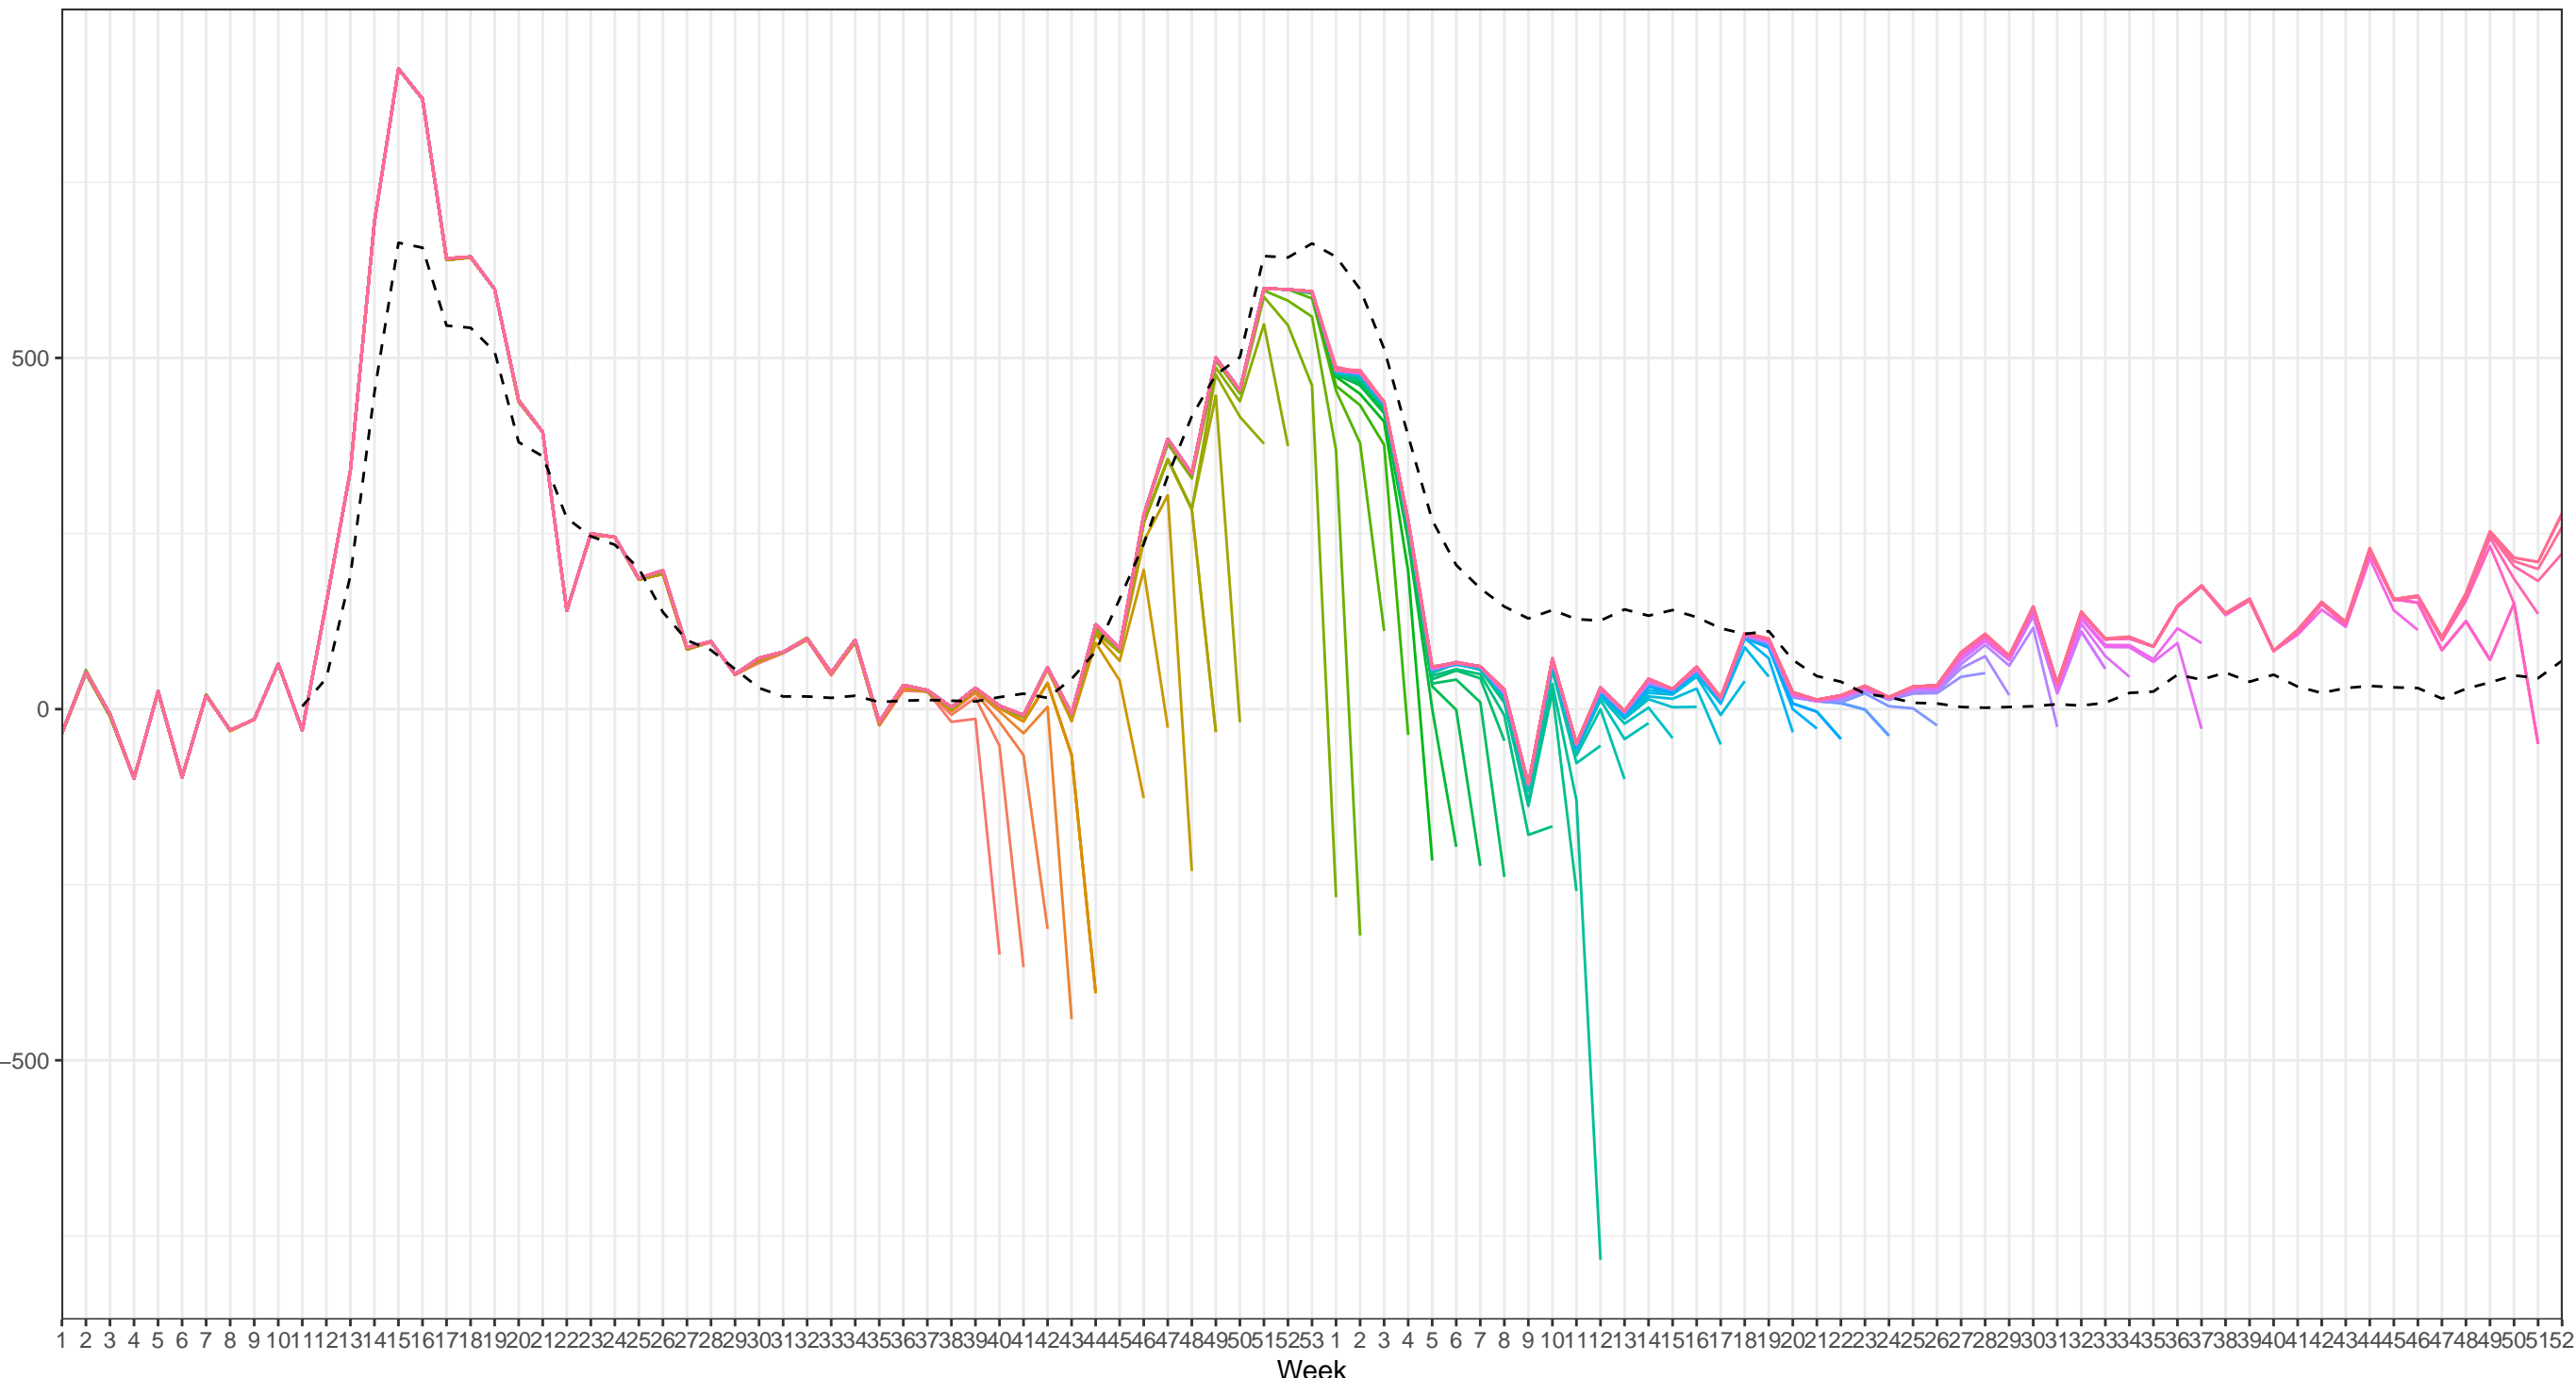

**Download date**

|            |            |            |
|------------|------------|------------|
| 2020-10-15 | 2021-02-26 | 2021-07-19 |
| 2020-10-22 | 2021-03-05 | 2021-08-03 |
| 2020-10-31 | 2021-03-12 | 2021-08-11 |
| 2020-11-05 | 2021-03-19 | 2021-08-17 |
| 2020-11-13 | 2021-03-25 | 2021-08-31 |
| 2020-11-15 | 2021-04-01 | 2021-09-10 |
| 2020-11-19 | 2021-04-09 | 2021-09-19 |
| 2020-11-27 | 2021-04-16 | 2021-09-23 |
| 2020-12-03 | 2021-04-24 | 2021-10-05 |
| 2020-12-10 | 2021-05-09 | 2021-10-11 |
| 2020-12-17 | 2021-05-14 | 2021-12-13 |
| 2020-12-22 | 2021-05-21 | 2021-12-22 |
| 2020-12-31 | 2021-05-28 | 2022-01-03 |
| 2021-01-08 | 2021-06-04 | 2022-01-06 |
| 2021-01-15 | 2021-06-11 | 2022-01-10 |
| 2021-01-22 | 2021-06-18 | 2022-01-17 |
| 2021-01-29 | 2021-06-25 | 2022-01-24 |
| 2021-02-05 | 2021-07-09 | 2022-01-31 |
| 2021-02-12 | 2021-07-16 | 2022-02-07 |
| 2021-02-19 |            | 2022-02-14 |

**Mortality type**

- Estimated excess mortality
- - Reported COVID-19 mortality

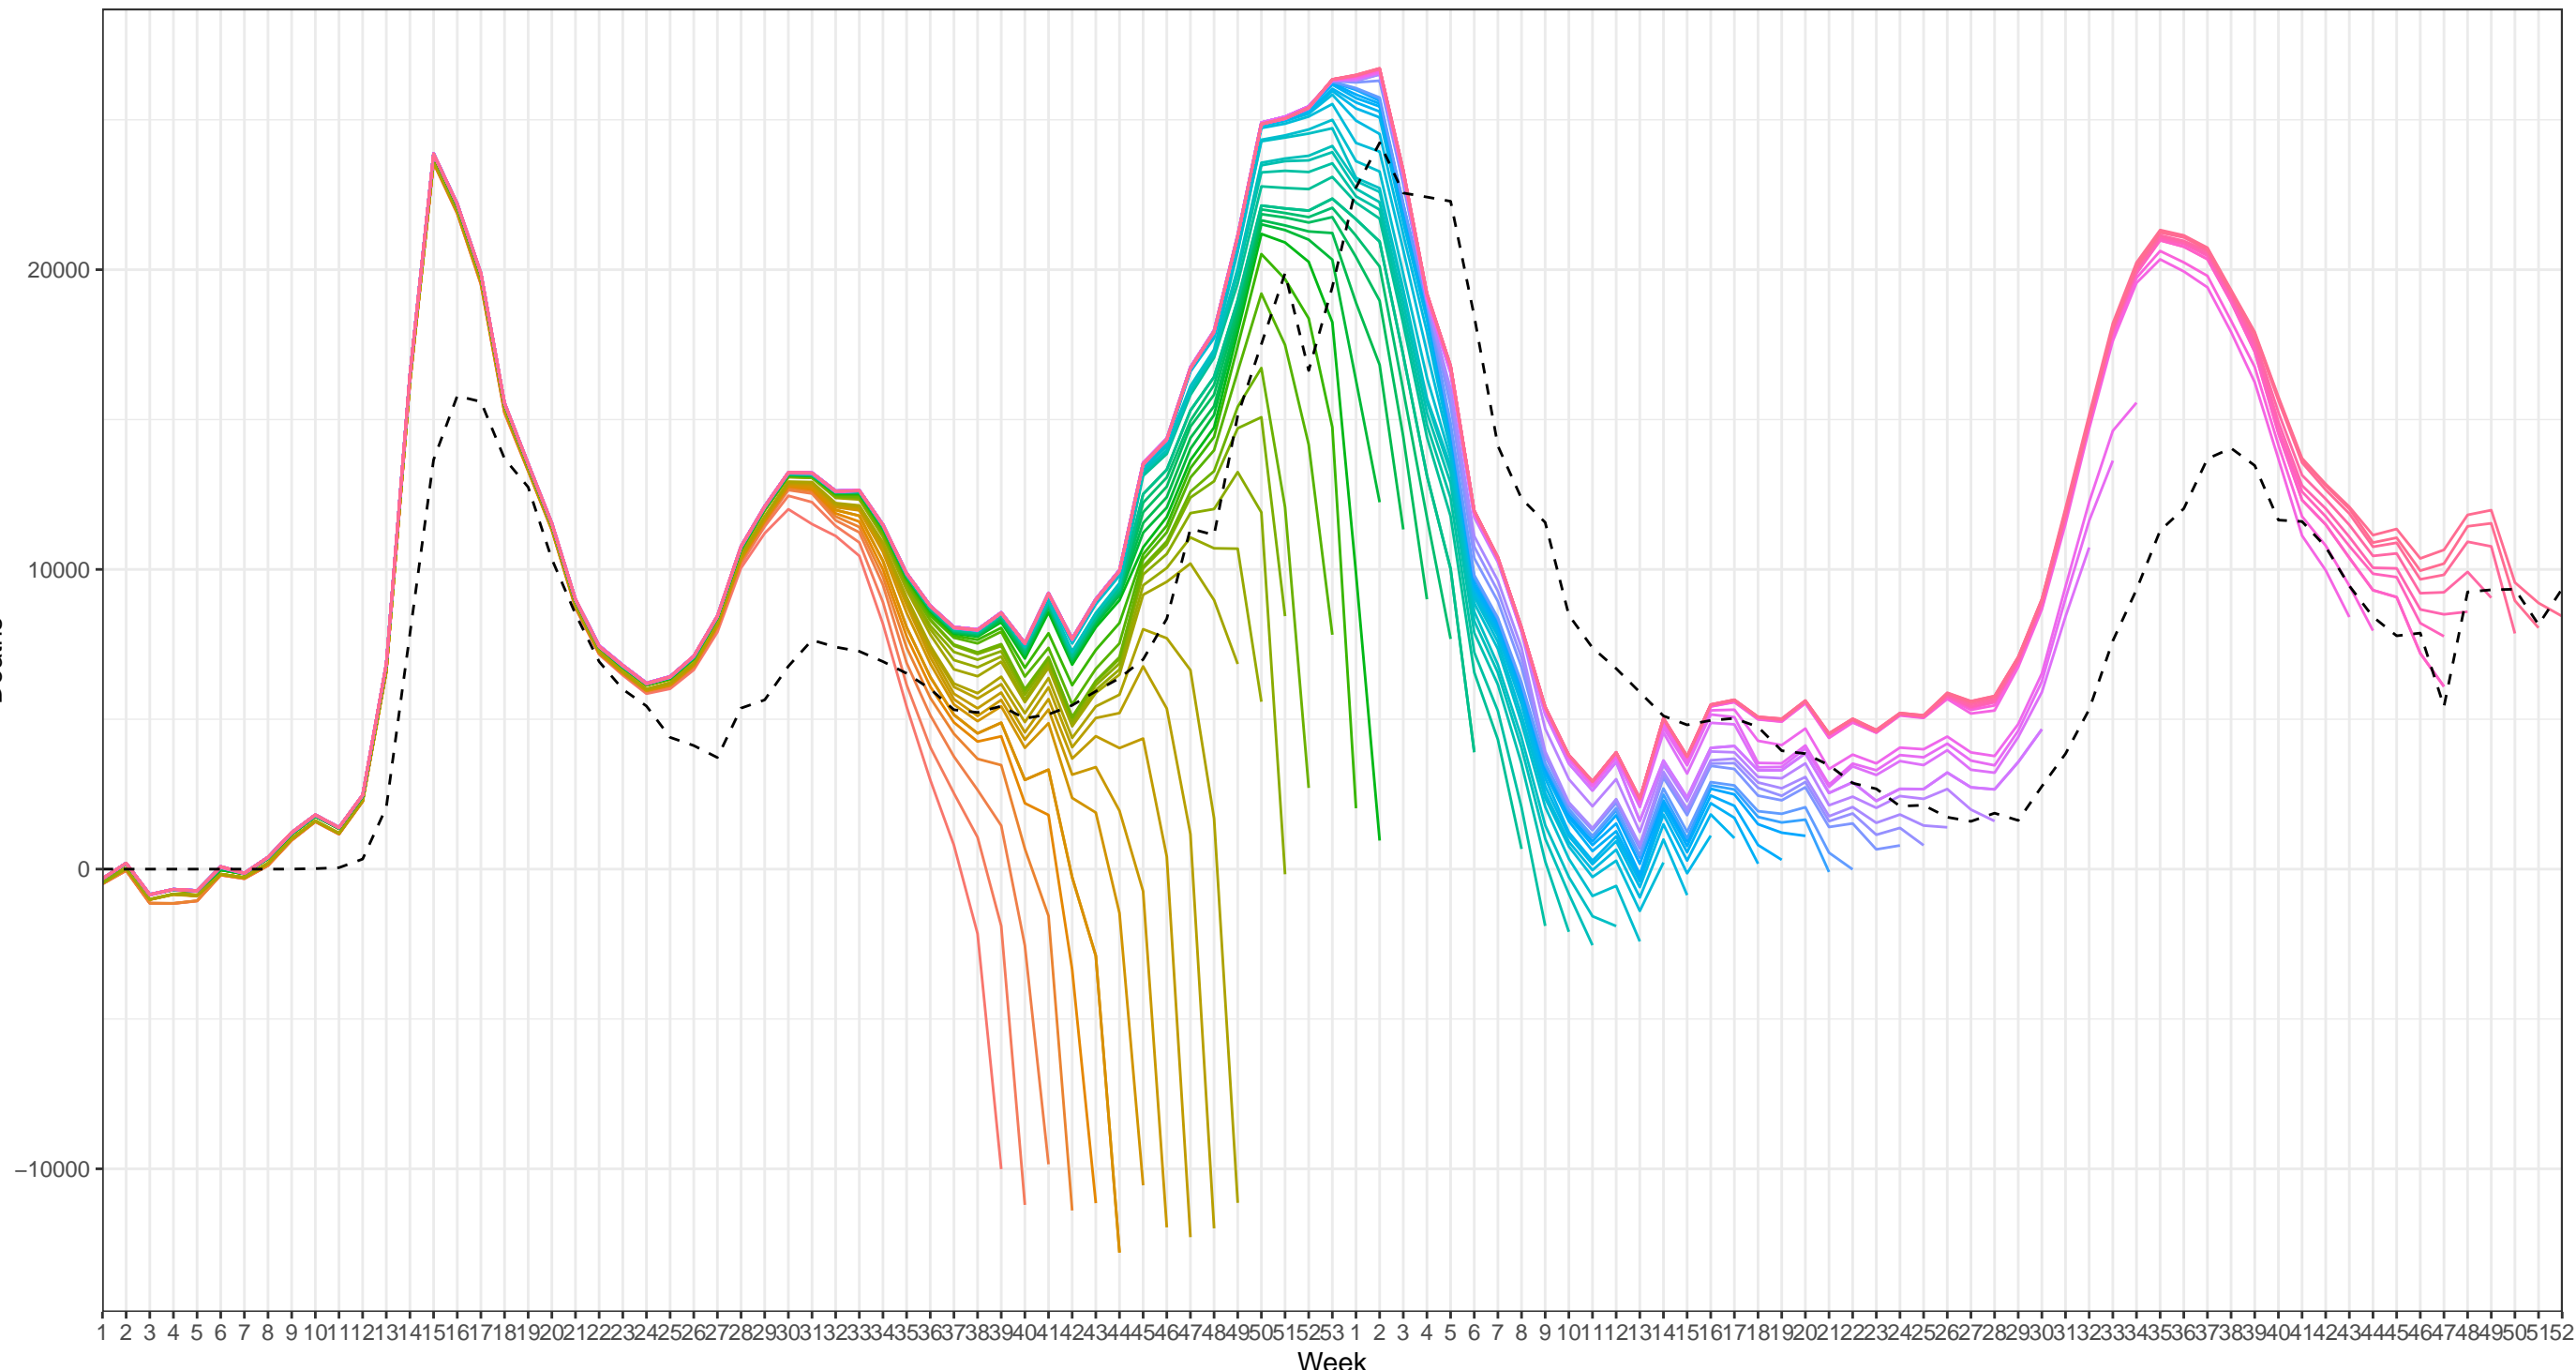

**Download date**

|            |            |            |
|------------|------------|------------|
| 2020-10-15 | 2021-02-26 | 2021-07-19 |
| 2020-10-22 | 2021-03-05 | 2021-08-03 |
| 2020-10-31 | 2021-03-12 | 2021-08-11 |
| 2020-11-05 | 2021-03-19 | 2021-08-17 |
| 2020-11-13 | 2021-03-25 | 2021-08-31 |
| 2020-11-15 | 2021-04-01 | 2021-09-10 |
| 2020-11-19 | 2021-04-09 | 2021-09-19 |
| 2020-11-27 | 2021-04-16 | 2021-09-23 |
| 2020-12-03 | 2021-04-24 | 2021-10-05 |
| 2020-12-10 | 2021-05-09 | 2021-10-11 |
| 2020-12-17 | 2021-05-14 | 2021-12-13 |
| 2020-12-22 | 2021-05-21 | 2021-12-22 |
| 2020-12-31 | 2021-05-28 | 2022-01-03 |
| 2021-01-08 | 2021-06-04 | 2022-01-06 |
| 2021-01-15 | 2021-06-11 | 2022-01-10 |
| 2021-01-22 | 2021-06-18 | 2022-01-17 |
| 2021-01-29 | 2021-07-09 | 2022-01-24 |
| 2021-02-05 | 2021-07-16 | 2022-01-31 |
| 2021-02-12 |            | 2022-02-07 |
| 2021-02-19 |            | 2022-02-14 |

**Mortality type**

- Estimated excess mortality
- - Reported COVID-19 mortality
